# Supplementary material for: Profiling the lncRNA-miRNA-mRNA ceRNA network to reveal potential crosstalk between inflammatory bowel disease and colorectal cancer
Source: PubMed Central journal article supplement (PMC6714963; doi:10.7717/peerj.7451), 2019-08-26

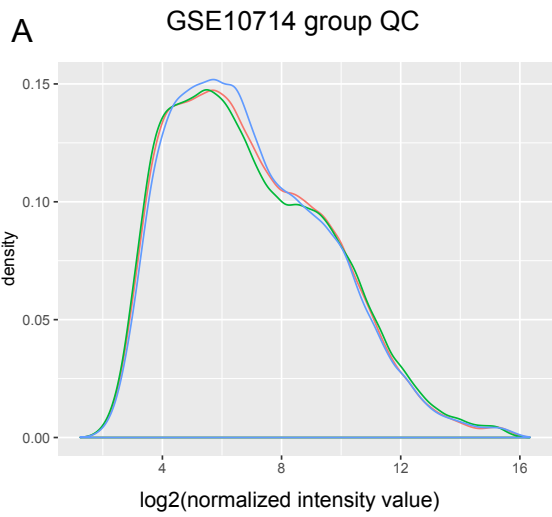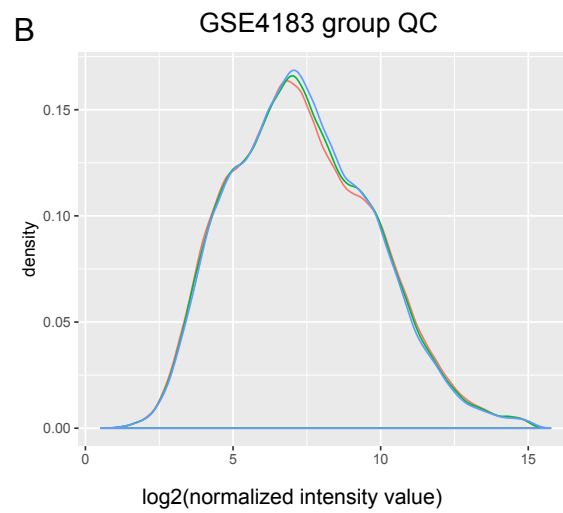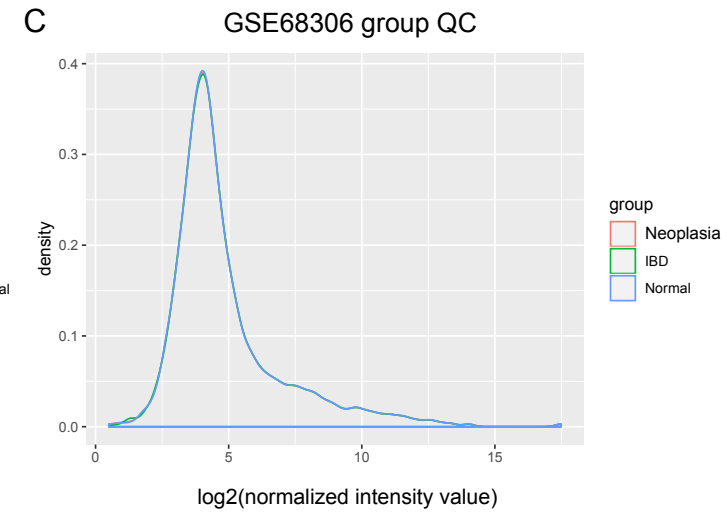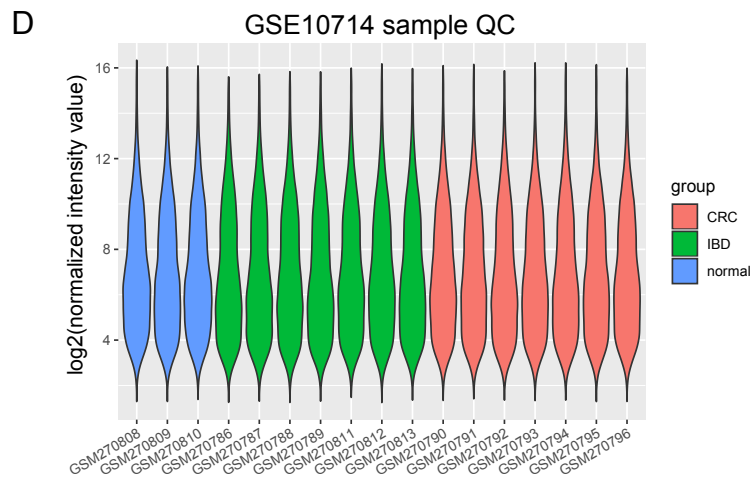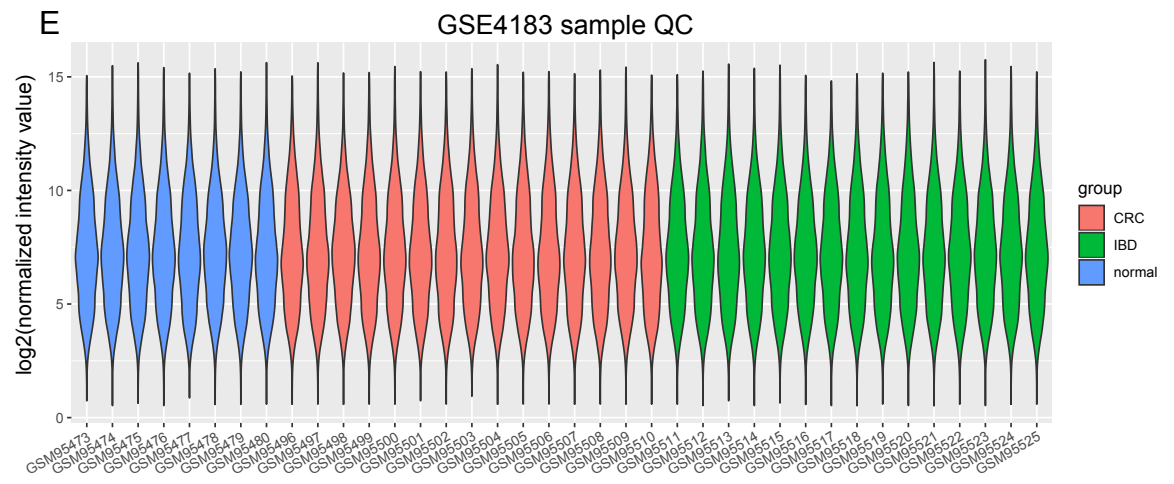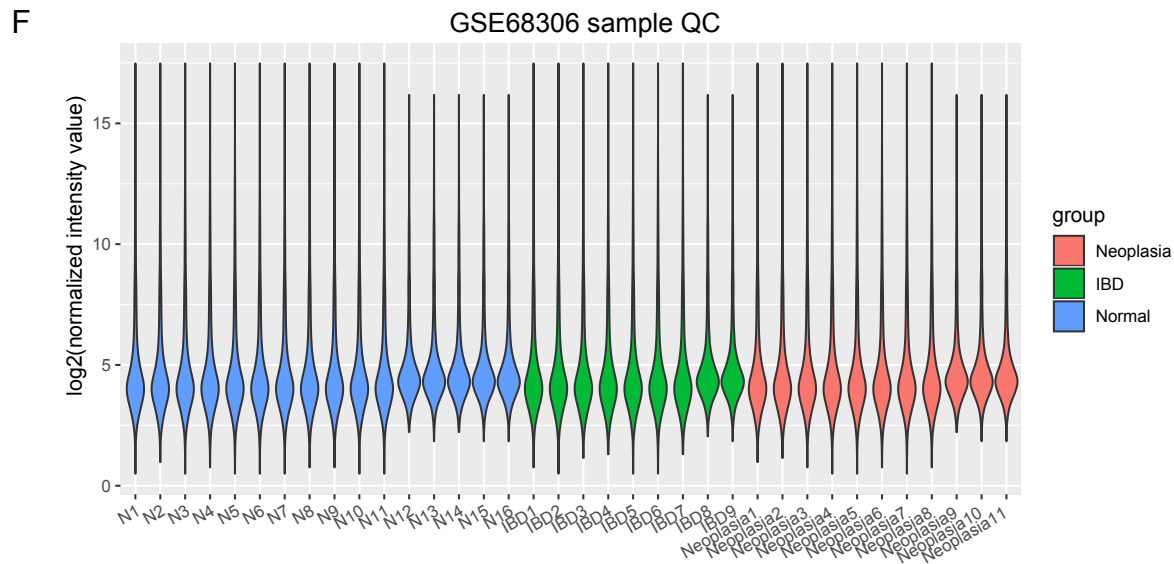

Supplement: peerj-07-7451-s014.pdf [file peerj-07-7451-s014.pdf]
