# Supplementary material for: Profiling the lncRNA-miRNA-mRNA ceRNA network to reveal potential crosstalk between inflammatory bowel disease and colorectal cancer
Source: PubMed Central journal article supplement (PMC6714963; doi:10.7717/peerj.7451), 2019-08-26

**A**

### GSE4183 DEG screening CRC vs Normal

The number of up gene is 1725  
The number of down gene is 441

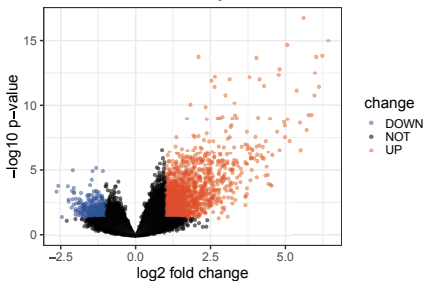**B**

### GSE10714 DEG screening CRC vs Normal

The number of up gene is 347  
The number of down gene is 78

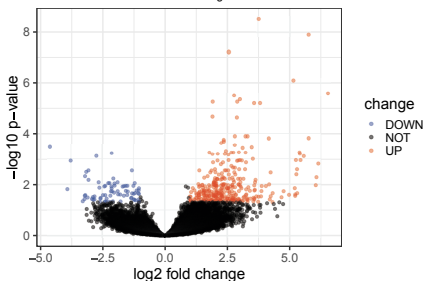**C**

### GSE68306 DE-miRNA screening CRC vs Normal

The number of up gene is 1  
The number of down gene is 3

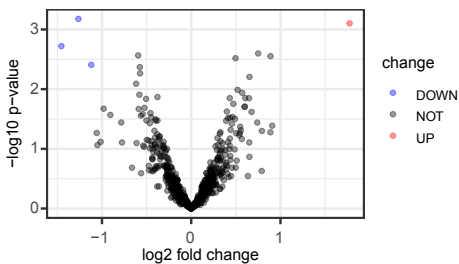

Supplement: peerj-07-7451-s015.pdf [file peerj-07-7451-s015.pdf]
