# Supplementary material for: Profiling the lncRNA-miRNA-mRNA ceRNA network to reveal potential crosstalk between inflammatory bowel disease and colorectal cancer
Source: PeerJ. 2019 Aug 26;7:e7451. doi: 10.7717/peerj.7451 (PMC6714963; doi:10.7717/peerj.7451)
Supplement: Table S1 [file peerj-07-7451-s001.xlsx]

## Sheet: Supplymentary Table 1 DEG_GSE10
Probe.Set.ID	Mean	log2(FC)	Pvalue	change	Gene.Symbol
226360_at	673.085	1.03024	0.0180618	UP	ZNRF3
226808_at	318.899	1.01741	0.0185406	UP	ZNF862
229700_at	355.408	1.39842	0.00247328	UP	ZNF738
227952_at	82.7682	-2.52454	0.00187717	DOWN	ZNF595
235121_at	85.022	-1.23972	0.0283524	DOWN	ZNF542P
232338_at	322.527	1.11654	0.0154074	UP	ZNF431
1567855_at	27.1561	1.96205	0.0431776	UP	ZNF29P
219540_at	807.829	-1.02867	0.0487363	DOWN	ZNF267
243456_at	44.9272	2.37244	0.00139757	UP	ZNF214
207417_s_at	136.441	1.24122	0.0218449	UP	ZNF177
235580_at	123.068	1.08729	0.0272352	UP	ZNF141
209049_s_at	3364.27	1.05945	0.00527075	UP	ZMYND8
210281_s_at	253.598	2.06074	0.00105882	UP	ZMYM2
210282_at	204.237	1.55229	0.00380508	UP	ZMYM2
233060_at	42.8137	-1.76312	0.00246665	DOWN	ZMIZ1
1557953_at	1699.88	1.08619	0.0260174	UP	ZKSCAN1
214900_at	149.975	1.69449	0.00303353	UP	ZKSCAN1
207197_at	18.1899	2.04156	0.0490101	UP	ZIC3
203603_s_at	421.974	-1.34851	0.00205665	DOWN	ZEB2
235593_at	175.843	-2.18028	0.00165483	DOWN	ZEB2
222451_s_at	1976.07	1.06858	3.72e-06	UP	ZDHHC9
235015_at	279.345	1.07802	6.87e-05	UP	ZDHHC9
208087_s_at	146.796	-1.37231	0.0098526	DOWN	ZBP1
242020_s_at	209.188	-1.95404	0.00738782	DOWN	ZBP1
219836_at	87.425	-2.40283	0.00966876	DOWN	ZBED2
235916_at	46.267	-1.62764	0.0270022	DOWN	YPEL4
213830_at	194.575	-1.70432	6.12e-07	DOWN	YME1L1
232574_at	16.3857	2.33299	0.0244404	UP	XYLT1
1555785_a_at	202.779	-1.73757	0.00295767	DOWN	XRN1
206484_s_at	134.64	2.66659	0.00330435	UP	XPNPEP2
237802_at	79.255	-1.45267	0.0153056	DOWN	XKR4
228794_at	33.1257	1.65404	0.0298939	UP	XIRP2
210301_at	948.843	-1.86344	0.000598636	DOWN	XDH
241994_at	6120.09	-1.78613	0.011441	DOWN	XDH
206366_x_at	163.666	-1.40799	0.013671	DOWN	XCL1
206796_at	159.455	-1.91564	0.0176244	DOWN	WISP1
229802_at	399.211	-1.73233	0.0212329	DOWN	WISP1
202664_at	1234.68	-1.2886	0.000308026	DOWN	WIPF1
212533_at	1388.27	1.01845	0.0322679	UP	WEE1
227174_at	550.785	3.32614	0.00263641	UP	WDR72
236741_at	102.231	3.72155	0.00714447	UP	WDR72
229597_s_at	270.228	-1.01234	0.00867406	DOWN	WDFY4
38964_r_at	1471.22	-1.22828	0.00193856	DOWN	WAS
200628_s_at	2610.04	-1.98728	0.000104559	DOWN	WARS
200629_at	4894.29	-1.8595	2.64e-05	DOWN	WARS
1568801_at	32.0423	2.29865	0.000262042	UP	VWA9
204787_at	783.422	-1.29047	0.00823262	DOWN	VSIG4
235710_at	31.0244	1.86723	0.00481646	UP	VPS53
220528_at	52.9743	-3.58216	5.48e-05	DOWN	VNN3
205922_at	410.914	-3.01024	1.27e-05	DOWN	VNN2
235751_s_at	69.1269	-2.1265	0.0213091	DOWN	VMO1
1554943_at	478.259	1.16336	0.0107083	UP	VIL1
1554945_x_at	425.233	1.04845	0.00787909	UP	VIL1
203868_s_at	1315.02	-1.47583	5.56e-05	DOWN	VCAM1
206219_s_at	389.293	-1.66157	0.000770856	DOWN	VAV1
226029_at	343.314	1.5745	0.0125985	UP	VANGL2
204929_s_at	541.806	-1.16748	0.00233318	DOWN	VAMP5
228675_at	151.111	-1.14426	0.0260546	DOWN	USP30-AS1
241755_at	214.986	1.24778	0.0143936	UP	UQCRC2
244795_at	54.4961	1.78865	0.0438143	UP	UQCC1
203234_at	961.894	-1.37147	0.00666535	DOWN	UPP1
214382_at	53.0255	2.64131	0.0102146	UP	UNC93A
226678_at	97.9223	-1.29747	0.0348084	DOWN	UNC13D
208998_at	3184.93	-1.02305	0.00884171	DOWN	UCP2
243519_at	152.562	1.29172	0.0189972	UP	UBE3C
226612_at	158.282	-1.4585	0.0176981	DOWN	UBE2QL1
1554814_at	33.1172	-1.91101	0.0114682	DOWN	UBE2O
218141_at	75.347	-2.14546	0.0118006	DOWN	UBE2O
201649_at	3341.75	-1.35332	0.000126765	DOWN	UBE2L6
217823_s_at	3069.86	-1.00995	0.000913611	DOWN	UBE2J1
222435_s_at	2377.66	-1.04641	0.0219729	DOWN	UBE2J1
204122_at	2318.89	-1.56815	3.56e-05	DOWN	TYROBP
204858_s_at	791.563	-2.23777	4.47e-05	DOWN	TYMP
217497_at	156.974	-2.15065	0.00202708	DOWN	TYMP
219969_at	50.6497	1.7715	0.0342366	UP	TXLNG
230690_at	75.1479	2.11419	0.00139822	UP	TUBB1
1557994_at	32.949	1.84805	0.0423789	UP	TTN
242477_at	327.055	-1.13532	0.0215465	DOWN	TTC39B
227610_at	501.408	-1.54424	0.000238825	DOWN	TSPAN11
210055_at	27.666	-1.80979	0.0091077	DOWN	TSHR
237745_at	130.007	1.15976	0.00129953	UP	TSC22D1-AS1
219282_s_at	383.909	-1.18863	0.00126415	DOWN	TRPV2
217590_s_at	1044.68	-1.36838	0.000605214	DOWN	TRPA1
1568592_at	1624.17	-1.22992	0.00429443	DOWN	TRIM69
1553079_at	395.006	-4.01517	1.75e-06	DOWN	TRIM40
206911_at	197.614	-1.14253	0.0423985	DOWN	TRIM25
213293_s_at	2529.69	-1.31175	5.24e-05	DOWN	TRIM22
214249_at	147.648	1.74116	0.000960463	UP	TRIM2
210177_at	1499.56	-1.48522	0.000518421	DOWN	TRIM15
210885_s_at	503.635	-1.44501	0.000882882	DOWN	TRIM15
36742_at	2219.76	-1.71991	0.00104556	DOWN	TRIM15
218145_at	523.125	1.09826	0.04349	UP	TRIB3
1567624_at	21.0844	2.01614	0.019781	UP	TREML5P
216191_s_at	230.141	-1.70809	0.000868252	DOWN	TRDV3
232121_at	23.534	1.65893	0.0243402	UP	TRDMT1
210915_x_at	2133.99	-1.24048	0.00594415	DOWN	TRBC1
211796_s_at	2074.32	-1.15581	0.0204236	DOWN	TRBC1
213193_x_at	2219.77	-1.0467	0.00810604	DOWN	TRBC1
217147_s_at	123.849	-1.44287	0.0208089	DOWN	TRAT1
202837_at	317.17	-1.52297	0.000654941	DOWN	TRAFD1
243196_s_at	283.097	-1.04736	0.00116344	DOWN	TRAFD1
205804_s_at	209.406	-1.25411	0.0189972	DOWN	TRAF3IP3
213888_s_at	465.333	-1.06833	0.043768	DOWN	TRAF3IP3
205599_at	185.279	-1.02601	0.0437395	DOWN	TRAF1
209671_x_at	1278.92	-1.09265	0.0340342	DOWN	TRAC
210342_s_at	36.6923	-2.74219	0.00336804	DOWN	TPO
231554_at	40.1373	1.53534	0.038826	UP	TPD52L3
225802_at	482.45	1.17848	0.000474634	UP	TOP1MT
206568_at	79.194	-1.04526	0.0408509	DOWN	TNP1
209904_at	75.4565	4.19113	0.000611998	UP	TNNC1
220655_at	1511.97	-5.82075	1.36e-06	DOWN	TNIP3
235735_at	186.317	-1.36172	0.0182278	DOWN	TNFSF8
207907_at	49.8826	-3.32135	0.000226798	DOWN	TNFSF14
223501_at	988.954	-1.73856	4.25e-05	DOWN	TNFSF13B
223502_s_at	1531.55	-2.20057	7.27e-07	DOWN	TNFSF13B
207536_s_at	187.23	-1.4508	0.0250889	DOWN	TNFRSF9
203508_at	1099.8	-1.15918	0.0107083	DOWN	TNFRSF1B
207643_s_at	2651.94	-1.31247	0.000249342	DOWN	TNFRSF1A
224553_s_at	144.842	-1.43271	0.00019944	DOWN	TNFRSF18
206641_at	1945.34	-1.99495	0.00320717	DOWN	TNFRSF17
204932_at	204.458	-1.14542	0.0200163	DOWN	TNFRSF11B
204933_s_at	293.279	-1.12862	0.00534903	DOWN	TNFRSF11B
211163_s_at	152.612	-2.14242	0.0126633	DOWN	TNFRSF10C
234644_x_at	209.812	-1.89384	0.00520128	DOWN	TNFRSF10C
223583_at	419.033	-1.10102	5.09e-05	DOWN	TNFAIP8L2
208296_x_at	1731.02	-1.49253	7.74e-06	DOWN	TNFAIP8
210260_s_at	2159.53	-1.41773	7.1e-05	DOWN	TNFAIP8
206025_s_at	1352.84	-3.65786	0.000310397	DOWN	TNFAIP6
206026_s_at	1019.89	-3.27933	0.000636978	DOWN	TNFAIP6
202643_s_at	1225.48	-1.54345	0.000622433	DOWN	TNFAIP3
202644_s_at	3228.29	-1.54118	5.48e-05	DOWN	TNFAIP3
202510_s_at	1517.93	-2.26373	0.00056086	DOWN	TNFAIP2
207113_s_at	224.536	-1.62307	0.000459653	DOWN	TNF
205102_at	1753.34	-1.42243	0.000320908	DOWN	TMPRSS2
211689_s_at	2304	-1.32823	0.0252545	DOWN	TMPRSS2
226553_at	7479.43	-1.43253	0.0038711	DOWN	TMPRSS2
238429_at	237.957	-1.65357	0.000337543	DOWN	TMEM71
229302_at	131.496	1.36554	0.0215487	UP	TMEM178A
220169_at	88.577	-1.3201	0.0138549	DOWN	TMEM156
235614_at	24.1505	1.47819	0.0173528	UP	TMEM151A
218999_at	905.856	-1.60468	0.000275783	DOWN	TMEM140
1554866_at	30.6965	1.72473	0.0118076	UP	TMEM135
223523_at	25.5368	-2.1597	0.00184413	DOWN	TMEM108
239831_at	292.454	1.43648	0.000203107	UP	TMEM106C
206242_at	643.65	1.16541	0.00723035	UP	TM4SF5
220832_at	89.1014	-3.93778	8.52e-07	DOWN	TLR8
229560_at	636.655	-2.69926	2.1e-07	DOWN	TLR8
221060_s_at	272.419	-1.13078	0.0117808	DOWN	TLR4
224341_x_at	383.764	-1.56766	0.00265299	DOWN	TLR4
232068_s_at	170.491	-1.40371	0.0164903	DOWN	TLR4
204924_at	831.842	-3.2199	8.97e-07	DOWN	TLR2
210176_at	422.722	-2.49014	4.12e-06	DOWN	TLR1
206472_s_at	293.214	-1.18182	0.00492309	DOWN	TLE3
206243_at	167.445	1.07534	0.0188329	UP	TIMP4
1552280_at	75.2233	-1.80082	0.0182949	DOWN	TIMD4
240070_at	127.114	-1.26156	0.00691009	DOWN	TIGIT
226117_at	1657.71	-2.16138	3.3e-07	DOWN	TIFA
235971_at	121.808	-1.37049	0.016254	DOWN	TIFA
222931_s_at	355.302	1.01955	0.00821631	UP	THNSL1
207571_x_at	572.164	-1.86394	4.4e-05	DOWN	THEMIS2
210785_s_at	628.928	-1.85901	1.76e-05	DOWN	THEMIS2
218500_at	432.651	1.05618	0.0218954	UP	THEM6
203887_s_at	506.486	-1.22533	0.0187882	DOWN	THBD
203888_at	275.927	-1.21367	0.0239123	DOWN	THBD
201042_at	1644	-1.3279	0.0122824	DOWN	TGM2
206715_at	284.771	-2.31037	9.98e-07	DOWN	TFEC
232383_at	121.51	-1.58744	0.000563716	DOWN	TFEC
221035_s_at	27.2918	-2.00811	0.0168847	DOWN	TEX14
218872_at	631.664	2.16167	0.00334646	UP	TESC
228285_at	51.672	-2.37977	0.000420009	DOWN	TDRD9
231104_at	20.6005	2.1745	0.0310814	UP	TDRD5
205943_at	986.159	-2.79387	0.00193117	DOWN	TDO2
206286_s_at	933.012	1.74302	0.00563791	UP	TDGF1
217143_s_at	345.912	-2.34669	0.00011908	DOWN	TCRDV2
221054_s_at	14.1289	2.33044	0.0120368	UP	TCL6
222146_s_at	827.525	-1.01179	0.0120473	DOWN	TCF4
228837_at	177.232	-1.02272	0.0151308	DOWN	TCF4
229706_at	155.217	1.51017	0.0186454	UP	TCERG1
220684_at	136.828	-1.14988	0.0168851	DOWN	TBX21
1570293_at	34.8172	1.62412	0.0364568	UP	TBL1X
227632_at	167.97	1.02267	0.00373939	UP	TBC1D24
209813_x_at	433.385	-1.76547	2.74e-05	DOWN	TARP
211144_x_at	476.341	-1.41665	0.00030615	DOWN	TARP
215806_x_at	437.915	-1.51571	0.00128851	DOWN	TARP
216920_s_at	464.574	-1.44679	0.000591966	DOWN	TARP
1553145_at	163.424	1.23365	0.0157166	UP	TAPT1-AS1
216373_at	14.8055	2.42375	0.0273702	UP	TAPT1
225973_at	1391.31	-1.52317	0.000422252	DOWN	TAP2
202307_s_at	4262.38	-1.75987	1.95e-05	DOWN	TAP1
229723_at	1978.97	-3.79786	9.16e-07	DOWN	TAGAP
234050_at	246.508	-2.53408	0.000982998	DOWN	TAGAP
242388_x_at	267.212	-3.1169	5.45e-08	DOWN	TAGAP
227884_at	350.735	1.04906	0.0353346	UP	TAF15
227891_s_at	551.77	1.10603	0.00685481	UP	TAF15
206552_s_at	345.063	3.83102	0.000320908	UP	TAC1
205342_s_at	268.418	1.52802	0.026124	UP	SULT1C2
205343_at	97.8616	2.13239	0.000260089	UP	SULT1C2
211470_s_at	341.975	1.45604	0.0272352	UP	SULT1C2
240200_at	39.0978	2.16996	0.00347534	UP	SULT1C2
223939_at	288.52	-1.44237	0.00886755	DOWN	SUCNR1
237784_at	82.953	1.60777	0.0245809	UP	SUB1
210190_at	58.9317	-3.39571	0.00011818	DOWN	STX11
235670_at	231.311	-2.29824	1.31e-05	DOWN	STX11
203767_s_at	953.579	-1.06403	0.0323883	DOWN	STS
203768_s_at	347.145	-1.21992	0.00686935	DOWN	STS
203770_s_at	44.3638	-2.91057	0.000390606	DOWN	STS
201060_x_at	3378	-2.04888	4.65e-06	DOWN	STOM
201061_s_at	5925.65	-1.47242	3.99e-05	DOWN	STOM
223883_s_at	69.7581	2.0465	0.0254008	UP	STK31
205214_at	317.068	-1.31856	0.0021417	DOWN	STK17B
217503_at	116.605	-1.17192	0.000320908	DOWN	STK17B
202693_s_at	1836.46	-1.1615	0.00187717	DOWN	STK17A
230587_at	18.8538	-2.07426	0.0144802	DOWN	STGC3
225987_at	845.761	-2.50503	9.94e-06	DOWN	STEAP4
206118_at	437.56	-1.39391	5.78e-06	DOWN	STAT4
208991_at	5126.36	-1.21133	0.000559085	DOWN	STAT3
208992_s_at	3041.66	-1.35844	0.000264101	DOWN	STAT3
200887_s_at	7677.46	-1.43743	9.21e-07	DOWN	STAT1
209969_s_at	1112.15	-2.14844	2.11e-05	DOWN	STAT1
AFFX-HUMISGF3A/M97935_3_at	4405.85	-1.37952	7.42e-05	DOWN	STAT1
AFFX-HUMISGF3A/M97935_5_at	124.81	-1.22028	0.0179114	DOWN	STAT1
AFFX-HUMISGF3A/M97935_MA_at	637.074	-1.8815	2.88e-05	DOWN	STAT1
AFFX-HUMISGF3A/M97935_MB_at	699.712	-2.09969	7.28e-06	DOWN	STAT1
220059_at	165.517	-1.46032	0.0490966	DOWN	STAP1
230261_at	233.892	-1.72785	2.67e-07	DOWN	ST8SIA4
230836_at	409.57	-1.47199	0.000177207	DOWN	ST8SIA4
242943_at	253.473	-1.65125	6.45e-06	DOWN	ST8SIA4
1555123_at	102.179	2.8367	0.00110597	UP	ST6GAL2
208322_s_at	145.834	-1.84395	0.0331402	DOWN	ST3GAL1
210497_x_at	33.1728	2.14119	0.0402189	UP	SSX2
213921_at	1916.1	-2.59332	0.0165344	DOWN	SST
201858_s_at	5324.3	-2.25829	2.91e-06	DOWN	SRGN
201859_at	10057.7	-1.46515	3.7e-05	DOWN	SRGN
1554473_at	177.109	1.54477	0.0137874	UP	SRGAP1
213577_at	1026.85	1.30281	0.0405827	UP	SQLE
224144_at	27.339	1.61242	0.0404676	UP	SPTBN4
213796_at	18.6668	3.80591	0.00092581	UP	SPRR1A
216980_s_at	43.3563	1.47914	0.0118076	UP	SPN
228325_at	246.503	-1.46949	0.0007929	DOWN	SPIDR
205312_at	107.892	-1.8345	0.00398631	DOWN	SPI1
212526_at	310.465	-1.12015	0.00759283	DOWN	SPG20
222753_s_at	2594.71	-1.01386	0.00541443	DOWN	SPCS3
200795_at	4327.71	-1.10012	0.00291902	DOWN	SPARCL1
235845_at	219.363	1.83995	0.0231016	UP	SP5
208392_x_at	287.7	-1.4866	0.000317255	DOWN	SP110
223980_s_at	552.567	-1.20872	0.00234973	DOWN	SP110
202935_s_at	4864.25	1.40099	0.000269902	UP	SOX9
1569638_at	16.3369	-2.47785	0.00457669	DOWN	SOX5
201417_at	5944.28	1.25675	0.000914394	UP	SOX4
201418_s_at	985.684	1.33708	0.000868925	UP	SOX4
213665_at	101.694	1.2531	0.0347551	UP	SOX4
213668_s_at	550.811	1.70021	0.000226568	UP	SOX4
1569111_at	72.9428	1.41773	0.0319057	UP	SOX13
204913_s_at	26.905	3.04335	0.00112961	UP	SOX11
209842_at	87.6464	-1.49139	0.0256998	DOWN	SOX10
228194_s_at	88.6139	-1.71028	0.0381442	DOWN	SORCS1
237285_at	21.9242	2.2387	0.0289121	UP	SORBS2
1566342_at	2460.46	-1.08657	0.0204207	DOWN	SOD2
206359_at	923.374	-4.37357	4.72e-06	DOWN	SOCS3
227697_at	2654.05	-3.28507	1.14e-09	DOWN	SOCS3
209999_x_at	101.367	-3.47964	2.36e-05	DOWN	SOCS1
210001_s_at	819.457	-2.94517	4.14e-08	DOWN	SOCS1
228869_at	548.273	-1.9529	0.000375341	DOWN	SNX20
218404_at	808.34	-1.88004	0.00116046	DOWN	SNX10
205104_at	229.055	-1.49903	0.0252545	DOWN	SNPH
229050_s_at	656.234	1.11074	0.0343803	UP	SNHG7
212921_at	249.951	1.05861	0.0252545	UP	SMYD2
1562512_at	16.2286	2.12919	0.0184704	UP	SMPDL3A
209420_s_at	1193.84	-1.19133	0.0182454	DOWN	SMPD1
216230_x_at	237.448	-1.20474	0.0204601	DOWN	SMPD1
214360_at	19.7764	1.81619	0.0384201	UP	SMARCA4
225282_at	879.158	-1.21021	0.000222287	DOWN	SMAP2
1565702_at	43.145	2.16959	0.0250723	UP	SMAD4
229835_s_at	1293.32	1.478	0.0332779	UP	SLMO2
226743_at	296.512	-1.53329	0.0119051	DOWN	SLFN11
1554332_a_at	255.383	1.88341	0.011441	UP	SLCO4A1-AS1
242587_at	67.0679	-1.74455	0.00181654	DOWN	SLC9A9
209921_at	749.938	-1.68722	0.0051425	DOWN	SLC7A11
217678_at	696.077	-1.80227	0.0063487	DOWN	SLC7A11
219820_at	28.5918	-1.96664	0.0233938	DOWN	SLC6A16
219795_at	2379.74	-2.94326	0.0163802	DOWN	SLC6A14
215960_at	24.5826	2.10665	0.00919493	UP	SLC5A4
219525_at	139.122	-1.09384	0.0179906	DOWN	SLC47A1
235763_at	324.436	2.4632	0.000926114	UP	SLC44A5
228918_at	238.683	-1.16297	0.0356338	DOWN	SLC43A2
231341_at	87.2622	3.07211	0.00056193	UP	SLC35D3
204204_at	711.378	-1.53892	5.08e-05	DOWN	SLC31A2
204430_s_at	322.387	-1.4854	0.00458313	DOWN	SLC2A5
202497_x_at	689.308	-1.9247	0.00180624	DOWN	SLC2A3
202498_s_at	233.052	-1.40965	0.0395602	DOWN	SLC2A3
202499_s_at	1043.74	-2.22266	0.00044026	DOWN	SLC2A3
216236_s_at	414.248	-1.40328	0.0190599	DOWN	SLC2A14
222088_s_at	452.622	-1.94757	0.000975407	DOWN	SLC2A14
244353_s_at	197.124	2.00263	2.7e-05	UP	SLC2A12
201801_s_at	268.548	1.03002	0.0480161	UP	SLC29A1
218978_s_at	89.0113	-1.72723	0.0300241	DOWN	SLC25A37
221920_s_at	606.122	-1.08146	0.0201886	DOWN	SLC25A37
226179_at	1143.98	-1.094	0.0088407	DOWN	SLC25A37
242335_at	234.859	-1.2377	0.00325873	DOWN	SLC25A37
237741_at	269.605	1.29812	0.0125771	UP	SLC25A36
231787_at	26.73	2.0268	0.0198774	UP	SLC25A27
243969_at	30.2477	-1.78039	0.0364568	DOWN	SLC24A4
231398_at	16.0633	1.99397	0.032068	UP	SLC22A7
243623_at	74.0788	2.58305	0.00370731	UP	SLC1A7
202800_at	248.346	-1.90974	0.00225132	DOWN	SLC1A3
230003_at	161.677	-1.00718	0.028015	DOWN	SLC16A7
241925_x_at	78.1344	-1.01112	0.0490874	DOWN	SLC16A7
219593_at	666.668	-1.40787	0.00182503	DOWN	SLC15A3
219385_at	458.46	-1.67926	0.0021159	DOWN	SLAMF8
219386_s_at	725.373	-2.21704	2.22e-06	DOWN	SLAMF8
219159_s_at	1015.02	-1.85386	0.000521984	DOWN	SLAMF7
222838_at	1922.92	-2.53419	2.97e-06	DOWN	SLAMF7
234306_s_at	329.108	-1.72072	0.00357137	DOWN	SLAMF7
1555626_a_at	94.3617	-1.92233	0.000788911	DOWN	SLAMF1
206181_at	466.636	-2.51972	1.46e-08	DOWN	SLAMF1
239427_at	198.383	-1.51269	0.00527961	DOWN	SLAMF1
203760_s_at	844.008	-1.29107	0.00589781	DOWN	SLA
203761_at	1237.83	-1.6114	4.72e-06	DOWN	SLA
205484_at	292.807	-1.14323	0.0479847	DOWN	SIT1
220485_s_at	140.53	-1.1812	0.0347624	DOWN	SIRPG
1554624_a_at	113.1	-1.77368	0.0399318	DOWN	SIRPB1
202897_at	777.88	-1.35591	0.0171263	DOWN	SIRPA
208078_s_at	582.565	-1.19265	0.0192559	DOWN	SIK1
207224_s_at	201.469	-1.16028	0.00914919	DOWN	SIGLEC7
220000_at	99.7998	-2.172	0.000303887	DOWN	SIGLEC5
1552806_a_at	72.1924	-1.451	0.00997997	DOWN	SIGLEC10
1552807_a_at	531.049	-1.59091	0.000217021	DOWN	SIGLEC10
44673_at	330.366	-1.03991	0.0300895	DOWN	SIGLEC1
223744_s_at	219.298	1.21012	0.0144808	UP	SIAE
232404_at	20.7431	1.90488	0.0311303	UP	SHROOM4
244825_at	78.1173	2.0448	0.0103881	UP	SHROOM4
213308_at	549.534	1.31821	0.000423735	UP	SHANK2
243681_at	107.432	1.36627	0.00908577	UP	SHANK2
201811_x_at	1418.66	-1.39353	0.00110597	DOWN	SH3BP5
226673_at	264.682	-1.5999	0.0047591	DOWN	SH2D3C
1553177_at	93.5206	-1.44595	0.00245594	DOWN	SH2D1B
210116_at	133.295	-1.2539	0.0153591	DOWN	SH2D1A
211210_x_at	57.691	-1.93445	0.0243486	DOWN	SH2D1A
228745_at	406.304	-1.0338	0.0103725	DOWN	SGTB
201739_at	3775.05	-1.71209	0.000226798	DOWN	SGK1
223672_at	60.7365	-1.70097	0.0144802	DOWN	SGIP1
218835_at	278.071	-1.7151	0.00187717	DOWN	SFTPA1
223678_s_at	18.4294	-2.46954	0.0253637	DOWN	SFTPA1
228979_at	15.2857	-2.57226	0.015275	DOWN	SFTA3
204052_s_at	36.4758	2.53467	0.00693651	UP	SFRP4
227210_at	280.117	-1.54359	0.00332688	DOWN	SFMBT2
210172_at	450.703	1.26143	0.00873296	UP	SF1
218720_x_at	346.266	1.12281	0.00333808	UP	SEZ6L2
205933_at	312.232	-1.06037	0.00180877	DOWN	SETBP1
218346_s_at	1199.81	1.14951	0.0213444	UP	SESN1
200986_at	1741.13	-1.635	0.000398478	DOWN	SERPING1
209723_at	1398.35	-1.50395	0.0259619	DOWN	SERPINB9
206034_at	498.69	-1.34092	0.00576993	DOWN	SERPINB8
211906_s_at	44.4169	-2.80836	0.00331922	DOWN	SERPINB4
209720_s_at	26.1572	-2.63072	0.00656048	DOWN	SERPINB3
1553499_s_at	53.5425	1.78014	0.00693651	UP	SERPINA9
222961_at	47.7185	1.94031	0.0165431	UP	SERINC2
203483_at	29.1576	2.17861	0.00250647	UP	SEMA4G
219259_at	365.297	-1.0804	0.00756014	DOWN	SEMA4A
209879_at	594.317	-1.41051	0.00516792	DOWN	SELPLG
204563_at	1087.86	-2.79387	7.42e-07	DOWN	SELL
212902_at	705.772	-1.12372	0.00695545	DOWN	SEC24A
202083_s_at	470.509	-1.65888	3.54e-05	DOWN	SEC14L1
223299_at	2986.01	-1.12574	0.00151514	DOWN	SEC11C
229912_at	132.339	-1.22481	0.0289012	DOWN	SDK1
218681_s_at	2162.78	-1.13576	0.00381479	DOWN	SDF2L1
235849_at	970.082	-1.32241	0.0273467	DOWN	SCARA5
223843_at	87.9127	-2.12295	0.000801153	DOWN	SCARA3
235210_s_at	151.975	2.03471	0.0182003	UP	SBSPON
204166_at	693.072	-1.66928	0.0134329	DOWN	SBNO2
215760_s_at	289.53	-1.08119	0.0124825	DOWN	SBNO2
204923_at	748.445	-1.11066	0.00690591	DOWN	SASH3
210790_s_at	201.434	-1.08605	0.0118438	DOWN	SAR1A
1555638_a_at	899.109	-2.04831	1.86e-05	DOWN	SAMSN1
220330_s_at	1521.13	-2.31513	7.76e-08	DOWN	SAMSN1
204502_at	523.785	-1.25188	0.00321035	DOWN	SAMHD1
234987_at	1860.64	-1.35034	0.000401323	DOWN	SAMHD1
235529_x_at	2747.48	-1.11571	0.00221206	DOWN	SAMHD1
235964_x_at	2353.26	-1.65759	0.00187717	DOWN	SAMHD1
226603_at	1458.62	-2.11062	2.88e-07	DOWN	SAMD9L
230036_at	626.919	-1.46794	0.000795625	DOWN	SAMD9L
235643_at	513.998	-1.61994	0.0007929	DOWN	SAMD9L
219691_at	792.622	-1.05285	0.0109247	DOWN	SAMD9
238673_at	1928.23	1.28529	0.000791829	UP	SAMD12
229661_at	51.1048	2.79932	0.000323191	UP	SALL4
207096_at	229.998	-1.8793	0.000410281	DOWN	SAA2-SAA4
208607_s_at	469.293	-2.21788	0.00299683	DOWN	SAA1
214456_x_at	783.801	-2.5491	0.0383625	DOWN	SAA1
227684_at	208.249	-1.07697	0.0485951	DOWN	S1PR2
203535_at	3988.01	-2.99726	2.24e-06	DOWN	S100A9
202917_s_at	10824.9	-2.80891	0.00130874	DOWN	S100A8
214370_at	158.334	-2.70411	0.0213272	DOWN	S100A8
205916_at	85.2649	-4.89493	1.49e-07	DOWN	S100A7
205863_at	880.073	-3.84159	6.81e-07	DOWN	S100A12
1552862_at	98.8657	1.1646	0.00607145	UP	RUSC1-AS1
204197_s_at	653.76	-1.3887	0.00177365	DOWN	RUNX3
204198_s_at	468.045	-1.66055	0.00182366	DOWN	RUNX3
1552568_at	24.6553	2.52842	0.0176981	UP	RTP3
206467_x_at	1111.54	-1.64987	0.0189972	DOWN	RTEL1-TNFRSF6B
237423_at	37.8296	2.7322	0.000320908	UP	RSPO4
213797_at	430.693	-1.78207	0.00322277	DOWN	RSAD2
242625_at	577.556	-2.20939	0.0230279	DOWN	RSAD2
221524_s_at	402.764	-1.08513	0.0239392	DOWN	RRAGD
229543_at	319.598	-2.57251	4.38e-06	DOWN	RP1-93H18.6
1569831_at	18.9959	2.04682	0.0393404	UP	RP11-586K2.1
216316_x_at	225.575	-1.77533	0.0143324	DOWN	RP11-548H18.2
1556103_at	202.337	1.00899	0.0343328	UP	RP11-480A16.1
238754_at	33.1979	1.60858	0.017649	UP	RP11-435O5.5
229613_at	237.349	2.71129	0.000611998	UP	RP11-401P9.4
1556314_a_at	261.83	-1.02033	0.0341175	DOWN	RP11-389C8.2
1562684_at	18.0053	2.03406	0.0477392	UP	RP11-342L8.2
239366_at	21.7965	1.92402	0.0429705	UP	RP11-301O19.1
243018_at	161.705	2.20192	0.0103725	UP	RP11-1L12.3
237115_at	90.6234	1.51182	0.0280063	UP	RP11-135A1.2
243023_at	114.535	1.22482	0.0236988	UP	RP11-127B20.2
230898_at	102.456	1.06057	0.010202	UP	RP11-108L7.15
1559348_a_at	26.0254	1.72172	0.0148885	UP	RP11-1008C21.2
205578_at	125.593	-1.31162	0.015704	DOWN	ROR2
218704_at	1228.04	1.42942	0.00552418	UP	RNF43
204669_s_at	202.255	-1.86616	0.00807081	DOWN	RNF24
210706_s_at	215.83	-1.12219	0.0469479	DOWN	RNF24
226542_at	479.433	-1.13904	0.0068788	DOWN	RNF24
232155_at	55.621	-2.10861	0.00994712	DOWN	RNF213
213038_at	1362.38	-1.3927	6.66e-06	DOWN	RNF19B
36564_at	1630.2	-1.27219	0.00330775	DOWN	RNF19B
228153_at	800.29	-2.17382	0.000140403	DOWN	RNF144B
204040_at	579.675	-1.12498	0.00298282	DOWN	RNF144A
227745_at	127.062	1.22488	0.00781588	UP	RNF139-AS1
219263_at	3259.81	1.17019	0.0144808	UP	RNF128
210056_at	295.531	-1.62392	0.00311474	DOWN	RND1
210991_s_at	202.618	-1.26221	0.034142	DOWN	RIMS3
204951_at	807.84	-2.8446	2.22e-06	DOWN	RHOH
1554539_a_at	389.971	-1.26933	0.0324011	DOWN	RHOF
202388_at	3713.91	-1.42737	4.27e-05	DOWN	RGS2
214362_at	22.99	1.49245	0.0320599	UP	RGS12
202988_s_at	301.741	-1.72393	0.00051518	DOWN	RGS1
216834_at	1323.41	-1.95719	9.93e-06	DOWN	RGS1
235816_s_at	65.2038	-2.07872	0.0299432	DOWN	RGL4
209568_s_at	1112.77	-1.42531	1.63e-06	DOWN	RGL1
212646_at	1811.57	-1.10088	0.005543	DOWN	RFTN1
204127_at	1070.05	1.19614	0.0365663	UP	RFC3
206617_s_at	37.4897	-1.67199	0.01558	DOWN	RENBP
226597_at	365.94	2.50715	0.000248979	UP	REEP6
212397_at	1322.07	-1.10266	0.0125986	DOWN	RDX
225763_at	472.552	-1.08243	0.00144696	DOWN	RCSD1
208370_s_at	3486.89	-1.28582	0.0179391	DOWN	RCAN1
215253_s_at	514.85	-1.37792	0.00264501	DOWN	RCAN1
219140_s_at	843.261	1.97128	0.0378384	UP	RBP4
231734_at	205.78	1.86815	0.00271112	UP	RBP2
207266_x_at	851.632	-1.30163	0.0200163	DOWN	RBMS1
209868_s_at	916.386	-1.07452	0.0461495	DOWN	RBMS1
215127_s_at	1572.85	-1.27173	0.0236625	DOWN	RBMS1
227223_at	1636.77	1.41086	0.00345988	UP	RBM39
223322_at	1274.75	-1.66369	1.02e-05	DOWN	RASSF5
221578_at	124.988	-1.53285	0.0148167	DOWN	RASSF4
226436_at	1012.05	-1.71626	0.00183529	DOWN	RASSF4
49306_at	367.948	-1.06237	0.0416493	DOWN	RASSF4
203185_at	775.697	-1.43103	0.000507564	DOWN	RASSF2
238755_at	293.101	2.75627	6.3e-05	UP	RASSF10
240862_at	66.1885	-1.64429	0.0317679	DOWN	RASGRP4
205590_at	599.059	-1.24438	0.0042136	DOWN	RASGRP1
206221_at	16.1831	2.85446	0.0300173	UP	RASA3
204070_at	4916.17	-2.22277	1.16e-06	DOWN	RARRES3
1553147_at	19.8638	2.05119	0.0162233	UP	RANBP3L
236880_at	69.5793	1.36081	0.0283524	UP	RAD52
207419_s_at	684.135	-1.31702	0.00522511	DOWN	RAC2
213603_s_at	4110.53	-1.24233	0.000624722	DOWN	RAC2
219210_s_at	236.134	-1.39566	0.00999842	DOWN	RAB8B
231399_at	186.794	1.21699	0.0474375	UP	RAB3IP
238853_at	569.42	1.28215	0.0215465	UP	RAB3IP
217762_s_at	1884.42	-1.75275	0.000693424	DOWN	RAB31
217763_s_at	2414.83	-1.17252	0.026952	DOWN	RAB31
217764_s_at	1896.76	-1.241	0.00269788	DOWN	RAB31
228390_at	256.507	-1.27601	0.0306862	DOWN	RAB30
204044_at	1086.09	1.00758	0.0280063	UP	QPRT
212262_at	345.812	-1.10623	0.0157166	DOWN	QKI
212263_at	609.945	-1.42347	0.0349704	DOWN	QKI
212636_at	855.541	-1.38535	0.000260926	DOWN	QKI
238746_at	147.295	1.22441	0.00450694	UP	PXMP4
215066_at	279.098	1.04103	0.0156976	UP	PTPRF
207238_s_at	1491.08	-2.27715	2.18e-07	DOWN	PTPRC
212587_s_at	2970.91	-1.95348	3.86e-05	DOWN	PTPRC
212588_at	2069.61	-2.18217	4.09e-06	DOWN	PTPRC
204852_s_at	388.243	-1.08698	0.00112526	DOWN	PTPN7
227944_at	301.368	1.10033	0.0191538	UP	PTPN3
206060_s_at	272.197	-1.0065	0.0241225	DOWN	PTPN22
236539_at	156.395	-1.12312	0.0390639	DOWN	PTPN22
1569552_at	66.997	1.3521	0.0307695	UP	PTPN18
204748_at	730.815	-1.7166	0.00693651	DOWN	PTGS2
205128_x_at	825.305	-1.26966	0.0301574	DOWN	PTGS1
215813_s_at	793.46	-1.3503	0.0284789	DOWN	PTGS1
238669_at	511.075	-1.25988	0.0258274	DOWN	PTGS1
228825_at	447.4	1.20026	1.52e-05	UP	PTGR1
219658_at	199.725	1.00773	0.0475005	UP	PTCD2
206278_at	186.249	-1.55745	0.00816923	DOWN	PTAFR
211661_x_at	363.055	-2.16048	0.000788911	DOWN	PTAFR
227184_at	1272.57	-1.77626	0.000379564	DOWN	PTAFR
219938_s_at	416.444	-1.49016	0.0126937	DOWN	PSTPIP2
205194_at	303.419	1.25105	0.0103511	UP	PSPH
238997_at	34.4749	3.66741	8.13e-06	UP	PSORS1C3
204279_at	5245.46	-1.46191	0.000801153	DOWN	PSMB9
220014_at	218.145	-1.33745	0.0142564	DOWN	PRR16
229376_at	491.903	1.75241	0.0240141	UP	PROX1
232629_at	825.887	-3.874	0.00187717	DOWN	PROK2
211917_s_at	55.9379	1.45378	0.0212727	UP	PRLR
216638_s_at	49.4847	1.34454	0.010011	UP	PRLR
207957_s_at	295.248	-1.52427	0.00166119	DOWN	PRKCB
209685_s_at	493.821	-1.70355	1.9e-05	DOWN	PRKCB
228795_at	96.2889	-2.11084	1.39e-05	DOWN	PRKCB
203680_at	1080.63	-1.46372	5.7e-05	DOWN	PRKAR2B
231224_x_at	65.535	1.54235	0.0151308	UP	PRKAG2
1553681_a_at	344.974	-1.12626	0.00145225	DOWN	PRF1
214617_at	595.04	-1.85269	8.98e-07	DOWN	PRF1
224909_s_at	496.671	-1.41298	0.0148167	DOWN	PREX1
224925_at	403.096	-1.38549	0.000921084	DOWN	PREX1
228224_at	65.2603	-2.15089	0.012606	DOWN	PRELP
217192_s_at	337.099	-1.36374	0.00558922	DOWN	PRDM1
228964_at	2074.2	-1.71445	3.23e-07	DOWN	PRDM1
233002_at	14.0569	-2.67194	0.00830208	DOWN	PPP4R4
1554364_at	27.139	-1.96184	0.0196539	DOWN	PPP2R5C
1562447_a_at	17.6478	1.99867	0.0314479	UP	PPP1R26-AS1
224927_at	1247.68	-1.18016	0.0177637	DOWN	PPP1R18
212750_at	304.992	-1.21773	0.0295916	DOWN	PPP1R16B
41577_at	439.594	-1.15522	0.016254	DOWN	PPP1R16B
235061_at	233.989	-1.12429	0.0238222	DOWN	PPM1K
203407_at	520.858	1.64497	0.00562825	UP	PPL
201489_at	3956.62	-1.04118	0.0431054	DOWN	PPIF
214375_at	350.626	1.2984	0.00831606	UP	PPFIBP1
211771_s_at	57.6536	-1.83279	0.000975407	DOWN	POU2F2
242866_x_at	111.797	-1.34693	0.0124825	DOWN	POU2F2
213695_at	350.672	1.44698	0.0367846	UP	PON3
205901_at	360.99	-2.03309	0.00023194	DOWN	PNOC
211766_s_at	460.543	2.5625	0.0180618	UP	PNLIPRP2
209640_at	174.592	-1.05085	0.013541	DOWN	PML
209848_s_at	92.6957	1.11552	0.0104887	UP	PMEL
213241_at	1164.3	-1.45307	0.000177207	DOWN	PLXNC1
215807_s_at	384.082	1.37282	0.0238484	UP	PLXNB1
210198_s_at	192.351	-1.77494	0.00202708	DOWN	PLP1
204519_s_at	982.192	1.76554	0.0202908	UP	PLLP
204436_at	758.363	-1.11763	0.00146901	DOWN	PLEKHO2
218223_s_at	543.393	-1.49987	0.00347534	DOWN	PLEKHO1
228171_s_at	336.247	1.31148	0.00247328	UP	PLEKHG4
209504_s_at	638.858	1.44182	0.0220545	UP	PLEKHB1
233943_x_at	72.0398	1.50698	0.0390639	UP	PLEKHA8
203470_s_at	2718.86	-3.62215	0.000221117	DOWN	PLEK
203471_s_at	3329.52	-4.15111	1.31e-07	DOWN	PLEK
204613_at	889.153	-1.21551	0.00363439	DOWN	PLCG2
230917_at	246.937	-1.48022	0.00351292	DOWN	PLCG2
210845_s_at	3504.84	-2.14336	3.13e-06	DOWN	PLAUR
211924_s_at	2549.41	-1.82247	0.000133785	DOWN	PLAUR
214866_at	662.283	-1.47949	0.000617981	DOWN	PLAUR
205479_s_at	2976.39	-2.43862	0.00532312	DOWN	PLAU
211668_s_at	1595.45	-2.34079	0.00713482	DOWN	PLAU
235746_s_at	112.129	1.51725	0.00429779	UP	PLA2R1
206214_at	1752.44	-2.18447	1.32e-05	DOWN	PLA2G7
220780_at	25.815	-2.19861	0.000877469	DOWN	PLA2G3
220423_at	70.1777	-3.56464	2.94e-07	DOWN	PLA2G2D
230673_at	59.802	-2.60392	0.00289061	DOWN	PKHD1L1
220548_at	19.9772	-1.64418	0.0144507	DOWN	PKDREJ
239303_at	205.028	1.08718	0.014645	UP	PIWIL2
201192_s_at	1260	-1.11053	0.000432908	DOWN	PITPNA
211205_x_at	57.5419	1.29276	0.0300954	UP	PIP5K1A
224739_at	2931.53	-1.35416	0.00173745	DOWN	PIM3
204269_at	977.828	-1.93679	1.12e-05	DOWN	PIM2
209193_at	732.199	-1.04238	0.0115138	DOWN	PIM1
219788_at	206.371	-1.88435	0.00143279	DOWN	PILRA
222218_s_at	521.615	-1.74914	0.000636978	DOWN	PILRA
227645_at	260.55	-1.93565	0.00193856	DOWN	PIK3R5
206369_s_at	56.9245	-2.90932	7.28e-06	DOWN	PIK3CG
206370_at	51.6439	-3.11752	2.28e-05	DOWN	PIK3CG
239294_at	549.907	-1.61429	1.36e-06	DOWN	PIK3CG
203879_at	567.357	-1.90575	1.93e-05	DOWN	PIK3CD
217620_s_at	200.203	1.00437	0.0365774	UP	PIK3CB
226459_at	2001	-1.81416	0.000407359	DOWN	PIK3AP1
229947_at	594.63	-3.75883	8.76e-05	DOWN	PI15
234939_s_at	24.6991	2.27596	0.0180618	UP	PHF12
232045_at	27.5784	-2.34638	0.0243167	DOWN	PHACTR1
218410_s_at	58.8925	1.55912	0.0382077	UP	PGP
230595_at	41.5153	-2.5483	0.0129795	DOWN	PGM5-AS1
202464_s_at	1718.73	-1.59726	0.00281685	DOWN	PFKFB3
205360_at	20.0389	2.10096	0.00651717	UP	PFDN4
218319_at	2201.36	-1.02194	0.00383208	DOWN	PELI1
1555490_s_at	244.489	1.50435	0.0226439	UP	PDZD3
215888_at	364.643	1.14779	0.0318333	UP	PDS5B
1554970_at	14.0719	2.12127	0.0257558	UP	PDILT
204200_s_at	100.953	-1.13583	0.0488226	DOWN	PDGFB
205593_s_at	2550.94	-1.54116	0.0386128	DOWN	PDE9A
205872_x_at	128.777	-3.51314	7.8e-08	DOWN	PDE4DIP
210305_at	68.3401	-1.80063	0.0405827	DOWN	PDE4DIP
203708_at	1630.91	-2.55296	4.09e-06	DOWN	PDE4B
211302_s_at	579.732	-2.30674	9.27e-05	DOWN	PDE4B
1557166_at	86.844	1.83874	0.00985817	UP	PDCD4
224399_at	29.2325	-2.14685	0.0250823	DOWN	PDCD1LG2
202465_at	909.292	-1.43575	0.0180251	DOWN	PCOLCE
213159_at	286.239	-1.3647	0.0138549	DOWN	PCNX
237179_at	215.036	1.43865	0.0091162	UP	PCMTD2
231043_at	83.6068	1.28537	0.00478053	UP	PCDP1
231726_at	116.897	1.34714	0.0144808	UP	PCDHB14
205534_at	186.714	-1.31002	0.00320717	DOWN	PCDH7
216254_at	36.841	-1.8237	0.0148885	DOWN	PARVB
223220_s_at	1658.61	-1.19317	0.02141	DOWN	PARP9
228128_x_at	370.974	-1.03681	0.0349482	DOWN	PAPPA
226435_at	526.617	-1.61733	0.00438528	DOWN	PAPLN
243092_at	103.772	1.05783	0.0367846	UP	PAN3-AS1
231018_at	43.0558	1.92173	0.0148346	UP	PALM3
229686_at	497.993	-1.30111	0.0132721	DOWN	P2RY8
208373_s_at	286.844	-1.77341	2.02e-06	DOWN	P2RY6
206637_at	988.821	-1.43809	0.00363316	DOWN	P2RY14
220005_at	642.625	-2.51863	2.1e-06	DOWN	P2RY13
230741_at	213.93	-1.94014	0.0104879	DOWN	P2RX7
210448_s_at	401.714	-1.27262	0.043768	DOWN	P2RX5
220256_s_at	100.608	-1.22653	0.017956	DOWN	OXCT2
1554008_at	65.7126	-1.71974	0.0469002	DOWN	OSMR
1554503_a_at	68.2953	-1.75321	0.00728352	DOWN	OSCAR
229768_at	287.974	1.90151	0.0270869	UP	OR51E1
208525_s_at	14.5717	2.37873	0.0281558	UP	OR2F1
206564_at	30.5294	-1.48148	0.0442049	DOWN	OPRL1
230271_at	76.8143	2.38355	0.0197179	UP	ONECUT2
233446_at	70.7427	2.31374	0.00484654	UP	ONECUT2
239911_at	69.0847	2.51005	0.00264059	UP	ONECUT2
213824_at	35.5439	-1.48336	0.0471781	DOWN	OLIG2
224525_s_at	86.5821	1.00273	0.043768	UP	OLA1
218730_s_at	46.2231	-2.41314	0.00247328	DOWN	OGN
222722_at	94.1697	-2.15352	0.000714765	DOWN	OGN
230926_s_at	68.6835	-1.10938	0.0166106	DOWN	ODF2L
205660_at	699.451	-1.84872	9.5e-05	DOWN	OASL
210797_s_at	739.502	-1.23006	0.0104879	DOWN	OASL
234173_s_at	33.4379	1.60338	0.038826	UP	NXF2
214250_at	130.888	1.65301	0.0215487	UP	NUMA1
231910_at	17.9357	1.98926	0.013541	UP	NUDT14
229838_at	303.586	-1.19696	0.00230487	DOWN	NUCB2
228547_at	86.1517	-1.57654	0.0164489	DOWN	NRXN1
235359_at	87.9464	-1.92571	0.0136548	DOWN	NRROS
206237_s_at	113.239	-2.79628	6.83e-08	DOWN	NRG1
206343_s_at	77.0517	-2.40837	0.00450732	DOWN	NRG1
209959_at	80.7091	-3.45607	2.67e-07	DOWN	NR4A3
201865_x_at	1400.09	-1.07803	0.0279577	DOWN	NR3C1
213479_at	640.503	-3.59524	4.47e-05	DOWN	NPTX2
221210_s_at	359.817	-1.11434	0.00256489	DOWN	NPL
223405_at	665.501	-1.06747	0.00116344	DOWN	NPL
215921_at	230.167	1.186	0.013541	UP	NPIPA5
228649_at	124.285	2.66108	0.000621113	UP	NOTUM
210037_s_at	1184.96	-3.26141	5.48e-08	DOWN	NOS2
1558738_at	190.817	1.03502	0.0314479	UP	NOL3
220066_at	121.445	-1.33851	0.00054789	DOWN	NOD2
206023_at	371.969	1.52612	0.0499203	UP	NMU
220384_at	21.3176	-3.06545	0.000801153	DOWN	NME8
237461_at	176.526	-1.60266	0.0204601	DOWN	NLRP7
207075_at	106.52	-2.06563	0.0109699	DOWN	NLRP3
210113_s_at	69.2377	-2.08988	0.0223647	DOWN	NLRP1
211824_x_at	63.7925	-1.56066	0.0339329	DOWN	NLRP1
226474_at	1563.09	-1.36888	0.00202708	DOWN	NLRC5
1552553_a_at	103.569	-1.47443	0.0037616	DOWN	NLRC4
211024_s_at	72.9598	3.19315	0.0179114	UP	NKX2-1
231235_at	157.445	1.59292	0.00119704	UP	NKTR
213915_at	342.406	-1.47574	0.00237449	DOWN	NKG7
229481_at	91.7631	2.73324	0.00267	UP	NKD1
232203_at	192.391	2.08079	0.00160954	UP	NKD1
203045_at	913.38	-1.10963	0.0230834	DOWN	NINJ1
228933_at	262.365	1.05309	0.0164489	UP	NHS
236953_s_at	115.247	1.25611	0.00630943	UP	NHLRC3
201502_s_at	8208.13	-1.23636	0.00360324	DOWN	NFKBIA
209239_at	1745.29	-1.04721	0.0103045	DOWN	NFKB1
1560527_at	32.5243	-1.62767	0.0436651	DOWN	NFE4
209930_s_at	66.2102	-2.0189	0.0324349	DOWN	NFE2
232593_at	180.222	-2.23019	0.00151591	DOWN	NEURL3
225006_x_at	2832.65	1.11765	0.013754	UP	NELFCD
225261_x_at	2532.83	1.15284	0.00665684	UP	NELFCD
225865_x_at	2850.53	1.0138	0.0194948	UP	NELFCD
237168_at	51.7659	1.35919	0.0279647	UP	NEK5
211089_s_at	397.53	1.16891	0.0281266	UP	NEK3
203961_at	1572.99	1.23243	0.00801979	UP	NEBL
203962_s_at	1290.71	1.15595	0.0157423	UP	NEBL
241782_at	119.434	1.55018	0.000120404	UP	NEBL
211583_x_at	35.1621	-1.82172	0.00803567	DOWN	NCR3
225344_at	9046.45	-1.38111	0.00175132	DOWN	NCOA7
209734_at	485.485	-1.28298	0.00125481	DOWN	NCKAP1L
238668_at	446.382	-1.33029	0.000231414	DOWN	NCKAP1L
205147_x_at	567.603	-1.49854	0.000175947	DOWN	NCF4
207677_s_at	589.087	-2.0061	2.16e-06	DOWN	NCF4
209949_at	1006.71	-2.11495	5.28e-05	DOWN	NCF2
204961_s_at	490.019	-1.8402	0.000416864	DOWN	NCF1
214084_x_at	544.623	-2.09732	4.47e-05	DOWN	NCF1
202906_s_at	1282.21	-1.35236	0.00775196	DOWN	NBN
228056_s_at	100.493	-1.80611	0.0278095	DOWN	NAPSB
1555167_s_at	1695.78	-2.2804	0.000283988	DOWN	NAMPT
217738_at	3560.91	-1.78345	3.42e-05	DOWN	NAMPT
217739_s_at	5270.41	-2.1533	1.33e-06	DOWN	NAMPT
243296_at	2892.24	-2.25196	0.000265311	DOWN	NAMPT
204860_s_at	254.587	-1.35999	0.00661766	DOWN	NAIP
219334_s_at	98.1759	-1.28402	0.00312727	DOWN	NABP1
222872_x_at	1078.42	-1.5228	0.000427243	DOWN	NABP1
233085_s_at	624.175	-1.57332	0.000473656	DOWN	NABP1
215105_at	40.8976	1.83515	0.0127011	UP	N4BP2L2-IT2
235547_at	212.857	1.21031	0.0341899	UP	N4BP2L2
204601_at	641.539	-1.86009	0.00309984	DOWN	N4BP1
32069_at	1780.35	-1.43566	0.011292	DOWN	N4BP1
221286_s_at	2913.08	-1.6297	0.0125215	DOWN	MZB1
223565_at	2495.55	-1.73318	0.0095883	DOWN	MZB1
219728_at	136.648	-1.53048	0.0219079	DOWN	MYOT
213733_at	861.929	-1.79162	0.000275783	DOWN	MYO1F
215795_at	19.8209	1.88377	0.0281468	UP	MYH7B
209596_at	2194.9	-1.2439	0.00484945	DOWN	MXRA5
228846_at	3865.49	-1.63116	0.00404985	DOWN	MXD1
204994_at	560.912	-1.15594	0.0367941	DOWN	MX2
222268_x_at	104.997	2.15814	0.0211483	UP	MUC5B
214303_x_at	149.378	3.54047	0.000636978	UP	MUC5AC
226622_at	4234.41	1.3234	0.0180016	UP	MUC20
230043_at	540.328	1.54013	0.0174305	UP	MUC20
231941_s_at	2385.72	1.60695	0.000834846	UP	MUC20
231814_at	1409.47	3.2099	0.0364482	UP	MUC12
205932_s_at	236.083	2.51851	0.00191329	UP	MSX1
204885_s_at	305.796	3.29393	2.9e-06	UP	MSLN
243010_at	151.373	1.20164	0.0399206	UP	MSI2
223343_at	1407.59	-1.12751	0.00249102	DOWN	MS4A7
223280_x_at	1844.32	-1.1511	4.27e-05	DOWN	MS4A6A
224356_x_at	1845.27	-1.16034	1.64e-06	DOWN	MS4A6A
1555728_a_at	676.101	-1.38434	7.74e-05	DOWN	MS4A4A
219607_s_at	1267.53	-1.34192	3.54e-05	DOWN	MS4A4A
238728_at	128.912	1.01416	0.0135286	UP	MRPS23
232498_at	89.276	1.39834	0.0310343	UP	MROH1
204438_at	1250.32	-1.49551	1.9e-05	DOWN	MRC1
207566_at	37.7729	-1.86984	0.0115765	DOWN	MR1
226818_at	2895.47	-1.53038	1.16e-05	DOWN	MPEG1
226841_at	2185.45	-1.53141	5e-07	DOWN	MPEG1
1563668_at	44.3713	1.74205	0.0111895	UP	MORN1
236967_at	13.8605	2.21438	0.0240541	UP	MNX1-AS1
204959_at	1399.24	-2.62725	5.96e-06	DOWN	MNDA
203936_s_at	2809.57	-2.33441	3.9e-06	DOWN	MMP9
207890_s_at	506.699	-1.25092	0.00937778	DOWN	MMP25
204574_s_at	66.3426	-1.56491	0.021873	DOWN	MMP19
204580_at	11371.6	-1.43791	0.0185406	DOWN	MMP12
203876_s_at	74.9177	1.92297	0.0360512	UP	MMP11
203878_s_at	469.981	1.76234	0.000970846	UP	MMP11
221163_s_at	197.493	1.7356	0.000122651	UP	MLXIPL
1554886_a_at	32.9282	1.95751	0.0220586	UP	MLXIP
210409_at	103.151	1.17847	0.00760493	UP	MLLT4-AS1
204783_at	183.128	2.28269	0.0031109	UP	MLF1
204784_s_at	468.084	2.098	0.0477972	UP	MLF1
231746_at	28.4286	-1.56319	0.0264733	DOWN	MIXL1
218810_at	1676.15	-1.85945	0.0031109	DOWN	MIR6732
231990_at	352.45	-1.27154	0.0259835	DOWN	MIR6125
239269_at	71.4343	-1.88289	0.0185058	DOWN	MIR612
232123_at	25.5862	2.31446	0.000521984	UP	MIR4697
232848_at	15.9225	2.03428	0.0256762	UP	MIR4500HG
229934_at	153.601	-2.23916	0.00194441	DOWN	mir-223
229437_at	210.215	-2.00399	1.86e-05	DOWN	MIR155
239130_at	121.237	1.34154	0.0479944	UP	MIR101-1
220863_at	27.959	-1.64345	0.0107916	DOWN	MIP
210694_s_at	288.604	1.0049	0.0109247	UP	MID1
206247_at	372.629	-1.18988	0.00492309	DOWN	MICB
227168_at	205.37	-1.70488	0.0428465	DOWN	MIAT
228658_at	333.514	-1.40313	0.0337999	DOWN	MIAT
1558167_a_at	202.769	1.1179	0.037164	UP	MGC16275
206522_at	201.153	-2.53987	0.00122673	DOWN	MGAM
212713_at	852.92	-1.37368	0.00244341	DOWN	MFAP4
222276_at	153.944	1.07242	0.0278095	UP	METTL2B
205619_s_at	232.304	-1.36251	0.0148346	DOWN	MEOX1
204069_at	441.927	-1.11954	0.00866132	DOWN	MEIS1
1554208_at	650.451	-1.12685	0.00931102	DOWN	MEI1
230011_at	490.165	-1.35694	0.00357405	DOWN	MEI1
226869_at	230.003	2.50749	0.0315286	UP	MEGF6
231529_at	20.5362	1.90352	0.0367846	UP	MEG3
1559942_at	106.2	-1.05674	0.0135286	DOWN	MDFIC
217599_s_at	72.135	-1.9099	0.0213444	DOWN	MDFIC
220122_at	376.141	-1.4319	0.00674099	DOWN	MCTP1
235740_at	280.827	-1.46199	2.97e-05	DOWN	MCTP1
200796_s_at	273.126	-1.19583	0.0239688	DOWN	MCL1
200798_x_at	4585.97	-1.5485	0.00165137	DOWN	MCL1
214056_at	634.472	-1.26198	0.0200032	DOWN	MCL1
208017_s_at	17.197	-2.95111	0.00322277	DOWN	MCF2
235568_at	307.313	-2.76804	0.00414109	DOWN	MCEMP1
242077_x_at	125.505	1.24612	0.00791797	UP	MB21D1
217231_s_at	38.678	-2.67559	0.00729174	DOWN	MAST1
232224_at	154.322	-1.75294	0.0223757	DOWN	MASP1
204936_at	55.7134	1.44217	0.0341578	UP	MAP4K2
205027_s_at	374.042	-1.78248	0.00143279	DOWN	MAP3K8
216765_at	60.1784	1.57312	0.0476661	UP	MAP2K5
209166_s_at	1556.34	-1.01118	0.0413657	DOWN	MAN2B1
242660_at	33.5195	2.43878	0.0339454	UP	MALRD1
222372_at	157.871	1.19932	0.0199289	UP	MAGI1
36711_at	3615.62	-1.37877	0.00336563	DOWN	MAFF
218559_s_at	1872.17	-1.35499	4.31e-06	DOWN	MAFB
222670_s_at	986.73	-1.46548	0.000117419	DOWN	MAFB
219188_s_at	840.914	1.52064	0.0101184	UP	MACROD1
1566764_at	241.744	2.024	0.0117536	UP	MACC1
1566766_a_at	359.535	1.47514	0.013603	UP	MACC1
232151_at	364.79	2.03732	9.5e-05	UP	MACC1
204447_at	473.068	1.37082	0.00931102	UP	LZTS3
1559880_at	14.0786	1.79016	0.029161	UP	LZTS1-AS1
203518_at	582.326	-1.08799	0.00299683	DOWN	LYST
236039_at	86.8402	-2.83784	0.000345612	DOWN	LYPD5
202625_at	1952.23	-1.27223	0.000518674	DOWN	LYN
202626_s_at	2199.25	-1.25479	0.00728423	DOWN	LYN
210754_s_at	2134.12	-1.1121	0.0164903	DOWN	LYN
206584_at	1496.78	-2.16699	5.18e-09	DOWN	LY96
231124_x_at	301.048	-1.60654	0.00268393	DOWN	LY9
207457_s_at	829.602	5.03118	6.3e-05	UP	LY6G6D
206276_at	78.3758	-2.50401	0.0118464	DOWN	LY6D
220665_at	20.8077	-2.08513	0.0499892	DOWN	LUZP4
229193_at	257.973	1.13388	0.0030131	UP	LUC7L3
233818_at	20.4994	2.17255	0.0070445	UP	LTN1
207339_s_at	916.989	-1.72648	7.27e-07	DOWN	LTB
206975_at	30.6582	-1.97127	0.0442049	DOWN	LTA
211582_x_at	1051.1	-1.24136	0.000133592	DOWN	LST1
214181_x_at	990.379	-1.15046	0.00187717	DOWN	LST1
214574_x_at	1216.23	-1.30481	9.06e-05	DOWN	LST1
215633_x_at	797.339	-1.08398	0.00926122	DOWN	LST1
203523_at	688.376	-1.16792	0.0091162	DOWN	LSP1
229584_at	171.489	-2.14847	7.57e-06	DOWN	LRRK2
235935_at	71.6673	1.44465	0.0104608	UP	LRRC73
220003_at	80.3589	1.86336	0.0173024	UP	LRRC36
236917_at	25.9096	2.52826	0.0216122	UP	LRRC34
203835_at	463.368	-1.03172	0.00662926	DOWN	LRRC32
204674_at	713.839	-1.52247	3.26e-05	DOWN	LRMP
35974_at	483.377	-1.62482	7.42e-06	DOWN	LRMP
242825_at	32.0576	1.87861	0.037164	UP	LPPR5
1570250_at	20.0356	2.39932	0.0163484	UP	LPPR1
212274_at	431.645	-1.26689	0.0298627	DOWN	LPIN1
204036_at	1275.11	-1.19495	0.005543	DOWN	LPAR1
1559777_at	298.924	-3.08275	0.00684303	DOWN	LOC731424
1569095_at	288.126	-2.56257	0.0174305	DOWN	LOC731424
241607_at	861.487	1.18023	0.0302304	UP	LOC730102
1553130_at	56.2035	1.77485	0.0317298	UP	LOC652276
1560251_at	16.0908	-2.26353	0.04349	DOWN	LOC645485
240890_at	460.492	-1.27061	0.0079867	DOWN	LOC643733
238717_at	325.058	1.85827	0.00074192	UP	LOC441528
1558689_a_at	27.8828	2.60265	0.00686935	UP	LOC441461
1552622_s_at	462.893	1.34597	0.00139757	UP	LOC441259
223911_at	45.3555	-1.91277	0.00450732	DOWN	LOC440330
1566830_at	26.4379	-2.11053	0.00759283	DOWN	LOC440028
222196_at	66.7784	1.93822	0.0109516	UP	LOC389906
1562829_at	27.0511	2.45231	0.000461272	UP	LOC339568
1570131_at	17.1723	2.4731	0.00328998	UP	LOC285847
1557474_at	64.2987	1.70097	0.0191032	UP	LOC284578
1561536_at	47.2564	1.39247	0.0356227	UP	LOC283435
1557207_s_at	367.165	1.29824	0.0292952	UP	LOC283177
238112_at	52.9354	2.51539	2.96e-06	UP	LOC283177
232370_at	55.9405	2.29767	0.00831606	UP	LOC254057
1557871_at	19.0529	2.54281	0.00908577	UP	LOC253573
1556898_at	33.983	2.29231	4.47e-06	UP	LOC200830
227868_at	240.561	-1.04093	0.0353346	DOWN	LOC154761
59433_at	175.958	1.00452	0.00985632	UP	LOC102725263
239360_at	34.8705	1.81383	0.0197179	UP	LOC102723886
240591_at	47.3666	-2.1771	0.0100954	DOWN	LOC102723645
235325_at	103.467	-1.71564	0.00260347	DOWN	LOC101930112
242414_at	1528.21	1.44743	0.00109838	UP	LOC101929880
1560673_at	13.0954	-1.92405	0.0322804	DOWN	LOC101929591
241337_at	20.219	-2.02669	0.00854583	DOWN	LOC101929465
215565_at	471.684	-1.65418	0.0202202	DOWN	LOC101929272
202237_at	3350.77	-1.3423	0.0227637	DOWN	LOC101928916
202238_s_at	1662.02	-1.37203	0.0281962	DOWN	LOC101928916
207777_s_at	208.339	-1.49036	0.000868925	DOWN	LOC101928789
1556917_a_at	22.5228	2.33348	0.0125422	UP	LOC101928651
205267_at	3466.02	-2.1757	0.000226825	DOWN	LOC101928620
1562589_at	37.0262	-1.77709	0.0471781	DOWN	LOC101928460
1561436_at	62.6619	1.51037	0.0390315	UP	LOC101927877
237074_at	13.6467	-2.26471	0.0150457	DOWN	LOC101927761
1559361_at	85.8359	2.09445	0.0242917	UP	LOC101927668
231278_at	46.3048	1.88601	0.00931102	UP	LOC101927503
206953_s_at	411.304	-1.43318	0.00429814	DOWN	LOC101927458
1562389_at	18.794	3.10436	0.00052929	UP	LOC101927359
1561033_at	16.1059	2.60664	0.0197179	UP	LOC101927211
215627_at	18.167	2.42326	0.0127011	UP	LOC101926913
233712_at	65.1272	1.93602	0.0031109	UP	LOC101060181
210956_at	29.047	1.81803	0.0184465	UP	LOC100996758
228245_s_at	500.418	-1.21003	0.0276759	DOWN	LOC100509445
236553_at	185.307	1.13912	0.0455207	UP	LOC100507520
1556190_s_at	58.8293	-1.7061	0.0386288	DOWN	LOC100507516
238716_at	178.62	1.44502	0.0105476	UP	LOC100506990
214741_at	332.364	-1.11754	0.041015	DOWN	LOC100506639
81737_at	130.157	1.44399	0.00692979	UP	LOC100505915
216828_at	35.7561	2.20288	0.00163036	UP	LOC100505874
217320_at	1710.71	-3.44079	0.0034363	DOWN	LOC100293211
1563071_at	42.6195	-1.72885	0.0391295	DOWN	LOC100289061
1553474_at	13.3129	-2.31201	0.0374808	DOWN	LOC100288966
235060_at	405.368	1.35221	0.0281534	UP	LOC100190986
235167_at	150.672	1.08359	0.041015	UP	LOC100190986
244029_at	273.42	-1.08021	0.0488873	DOWN	LOC100131043
215078_at	310.96	-3.55467	0.000346623	DOWN	LOC100129518
215223_s_at	4601.2	-2.49	1.86e-05	DOWN	LOC100129518
216841_s_at	2106.37	-2.61358	3.72e-06	DOWN	LOC100129518
221477_s_at	1529.09	-1.37537	0.00198552	DOWN	LOC100129518
1569872_a_at	227.403	1.18998	0.0334626	UP	LMF1
220420_at	48.5569	-1.23372	0.0269432	DOWN	LMAN1L
200704_at	10790.9	-1.02589	0.00731876	DOWN	LITAF
200706_s_at	3916.53	-1.60282	0.000445881	DOWN	LITAF
1561400_at	14.289	2.04012	0.0405827	UP	LINC01180
231942_at	33.9765	-1.74942	0.0277951	DOWN	LINC01128
242222_at	126.761	1.83378	0.0123505	UP	LINC01106
236360_at	18.9945	-2.28607	0.0345419	DOWN	LINC00982
1560119_at	91.4724	2.97361	5.25e-07	UP	LINC00937
1558881_at	30.794	-2.01409	0.0262826	DOWN	LINC00924
1553658_at	47.5733	1.54009	0.0168294	UP	LINC00896
237699_at	44.4948	1.43907	0.0243679	UP	LINC00427
1556206_at	22.0209	-2.14116	0.0233938	DOWN	LINC00408
218600_at	110.008	-1.28419	0.0128626	DOWN	LIMD2
210152_at	292.765	-1.41343	0.00722909	DOWN	LILRB4
210225_x_at	583.886	-2.16546	0.000332078	DOWN	LILRB3
210784_x_at	578.629	-2.25221	0.000459653	DOWN	LILRB3
211133_x_at	600.888	-1.88983	0.000636338	DOWN	LILRB3
211135_x_at	563.333	-2.32484	0.000272771	DOWN	LILRB3
207697_x_at	537.162	-2.23009	0.000154385	DOWN	LILRB2
210146_x_at	390.96	-3.1509	2.72e-08	DOWN	LILRB2
207104_x_at	414.906	-1.77893	0.00481646	DOWN	LILRB1
211336_x_at	508.286	-1.38842	0.00527961	DOWN	LILRB1
208594_x_at	214.573	-1.33751	0.041015	DOWN	LILRA6
1555643_s_at	100.407	-2.40736	0.00285817	DOWN	LILRA5
215838_at	119.43	-1.42399	0.0386128	DOWN	LILRA5
206881_s_at	103.434	-3.7268	3.93e-06	DOWN	LILRA3
211101_x_at	140.484	-2.28629	0.000232632	DOWN	LILRA2
1559986_at	12.4947	3.41335	0.00256878	UP	LIFR-AS1
225575_at	430.95	-1.30643	0.014645	DOWN	LIFR
210393_at	226.169	2.56653	0.0278821	UP	LGR5
213880_at	1143.16	3.08689	0.000320908	UP	LGR5
206400_at	39.987	2.31481	0.0274457	UP	LGALS7
228762_at	1302.96	1.25786	0.0100499	UP	LFNG
229927_at	376.916	3.67824	0.00376391	UP	LEMD1
205269_at	1282.72	-2.60159	1.07e-05	DOWN	LCP2
205270_s_at	1389.33	-2.69975	1.36e-06	DOWN	LCP2
244251_at	207.845	-2.21189	1e-06	DOWN	LCP2
244598_at	207.234	-1.61971	0.000320908	DOWN	LCP2
208885_at	2061.81	-1.69619	2.96e-06	DOWN	LCP1
1569532_a_at	1340.2	5.1947	0.00198552	UP	LCN15
207930_at	57.4455	1.93514	0.0328944	UP	LCN1
204890_s_at	353.916	-1.02217	0.00722668	DOWN	LCK
204891_s_at	715.719	-1.20561	0.00122591	DOWN	LCK
207710_at	20.7615	-2.43778	0.00486976	DOWN	LCE2B
207734_at	550.54	-1.71949	0.000803768	DOWN	LAX1
221581_s_at	648.467	-1.17299	0.00505355	DOWN	LAT2
201720_s_at	2128.18	-1.2638	0.00370592	DOWN	LAPTM5
201721_s_at	7958.99	-1.08015	0.00027845	DOWN	LAPTM5
217933_s_at	6556.64	-1.28727	0.00044026	DOWN	LAP3
219463_at	95.6362	-2.10943	0.00631902	DOWN	LAMP5
205569_at	825.035	-2.01302	0.00167903	DOWN	LAMP3
213519_s_at	283.679	-1.05929	0.00334355	DOWN	LAMA2
216840_s_at	258.76	-1.39109	0.00965108	DOWN	LAMA2
208071_s_at	160.454	-1.84304	0.0037616	DOWN	LAIR1
210644_s_at	570.245	-1.34243	5.78e-06	DOWN	LAIR1
206486_at	149.152	-1.89826	0.00141504	DOWN	LAG3
210663_s_at	580.269	-2.06515	0.0351252	DOWN	KYNU
217388_s_at	1016.98	-2.38706	0.000440258	DOWN	KYNU
234635_at	78.6075	1.57302	0.0449739	UP	KRTAP4-1
231849_at	123.763	3.32306	2.83e-05	UP	KRT80
1562629_a_at	73.1144	2.85892	0.0383198	UP	KRT40
207787_at	21.1864	-1.96058	0.0217997	DOWN	KRT33B
205900_at	71.2266	-1.38568	0.0300954	DOWN	KRT1
217075_x_at	14.709	1.72976	0.0492083	UP	KMT2B
205306_x_at	246.028	-2.17601	2.58e-08	DOWN	KMO
211138_s_at	256.595	-2.14741	1.13e-06	DOWN	KMO
244264_at	44.1505	1.60818	0.0321494	UP	KLRG2
214470_at	1136.72	-1.29056	0.0042136	DOWN	KLRB1
205470_s_at	409.872	1.93708	0.00934252	UP	KLK11
1560396_at	249.973	-1.69777	0.00462304	DOWN	KLHL6
228167_at	491.933	-1.6071	0.000217771	DOWN	KLHL6
226001_at	765.488	-1.2963	0.00301766	DOWN	KLHL5
227565_at	282.962	-1.04939	0.0224734	DOWN	KLHL5
232297_at	232.589	-1.07675	0.0141955	DOWN	KLHL5
241682_at	415.161	1.28098	0.00302641	UP	KLHL23
236285_at	174.763	-1.14299	0.0326706	DOWN	KLHDC7B
208467_at	37.3061	-2.03855	0.0111786	DOWN	KLF12
205051_s_at	835.132	-1.3971	0.00450732	DOWN	KIT
211397_x_at	28.085	-1.87775	0.0298939	DOWN	KIR2DL2
207682_s_at	28.6863	-2.50525	0.00521045	DOWN	KIF25
215018_at	26.716	2.28859	0.0232809	UP	KIAA1731
215680_at	16.1792	1.89285	0.0479944	UP	KIAA1654
238885_at	149.416	1.11016	0.0369035	UP	KIAA1549
1554852_a_at	132.77	1.52117	0.00879025	UP	KIAA1257
230028_at	469.838	1.08719	0.0329661	UP	KIAA0907
206478_at	327.822	-1.58506	0.0258747	DOWN	KIAA0125
220377_at	137.345	-2.06093	0.0341899	DOWN	KIAA0125
205902_at	87.7034	-3.24701	5.86e-09	DOWN	KCNN3
205903_s_at	212.345	-2.25285	0.00386979	DOWN	KCNN3
222857_s_at	191.761	1.40609	0.00541443	UP	KCNMB4
206765_at	1543.64	-1.20688	0.0146049	DOWN	KCNJ2
210119_at	349.216	-3.60706	0.000455135	DOWN	KCNJ15
211806_s_at	224.564	-2.03042	0.00820115	DOWN	KCNJ15
228581_at	65.3922	-2.24508	0.00167245	DOWN	KCNJ10
1552742_at	87.0777	1.59217	0.0436651	UP	KCNH8
236407_at	22.2298	-2.02231	0.0145428	DOWN	KCNE1
213832_at	626.396	-1.64436	0.00554971	DOWN	KCND3
207103_at	17.455	-1.61754	0.0342304	DOWN	KCND2
207237_at	56.8117	-1.6778	0.0206631	DOWN	KCNA3
217511_at	122.581	1.09512	0.0206358	UP	KAZALD1
219213_at	324.967	-1.02635	0.0341505	DOWN	JAM2
229127_at	176.249	-1.04861	0.0037616	DOWN	JAM2
227677_at	826.533	-1.52575	0.00175583	DOWN	JAK3
205841_at	280.21	-2.03517	9.52e-06	DOWN	JAK2
205842_s_at	473.275	-1.18792	0.000487429	DOWN	JAK2
203710_at	409.288	-1.1144	0.00244628	DOWN	ITPR1
211323_s_at	107.878	-1.24445	0.0446299	DOWN	ITPR1
1563524_a_at	39.4671	2.8274	1.36e-05	UP	ITPK1-AS1
202746_at	1034.39	-1.00511	0.038826	DOWN	ITM2A
211339_s_at	288.856	-1.22794	0.00171444	DOWN	ITK
1553243_at	214.736	-1.51776	0.00110372	DOWN	ITIH5
219064_at	622.248	-1.23004	0.00126218	DOWN	ITIH5
205422_s_at	38.8533	3.16639	0.00462049	UP	ITGBL1
231993_at	44.4311	2.38981	0.0198774	UP	ITGBL1
205718_at	357.783	-1.37726	0.0317907	DOWN	ITGB7
1555349_a_at	923.563	-2.15435	5.3e-07	DOWN	ITGB2
202803_s_at	1689.35	-1.90338	1.36e-06	DOWN	ITGB2
236988_x_at	61.7988	-2.09626	0.0477952	DOWN	ITGB2
210184_at	272.884	-2.30563	0.00182366	DOWN	ITGAX
1554240_a_at	483.136	-1.14488	0.0320124	DOWN	ITGAL
235666_at	502.297	-1.08271	0.0044242	DOWN	ITGA8
205884_at	119.501	-1.0557	0.0499892	DOWN	ITGA4
205885_s_at	154.992	-1.15646	0.0107556	DOWN	ITGA4
204698_at	3940.23	-2.03916	6.56e-05	DOWN	ISG20
33304_at	2709.83	-1.75702	0.000264381	DOWN	ISG20
210239_at	53.8007	2.42417	0.00690591	UP	IRX5
229638_at	63.7517	2.14484	0.0052294	UP	IRX3
240287_at	163.877	-3.26258	0.00204815	DOWN	IRG1
208436_s_at	1146.12	-1.13773	0.0144808	DOWN	IRF7
204562_at	805.005	-1.67714	0.00130148	DOWN	IRF4
216986_s_at	53.015	-1.50645	0.00873296	DOWN	IRF4
224572_s_at	2219.47	1.36266	0.000151171	UP	IRF2BP2
202531_at	3287.24	-2.08902	6.45e-08	DOWN	IRF1
238725_at	2497.98	-2.14716	4.92e-07	DOWN	IRF1
213817_at	247.102	-2.0338	2.22e-05	DOWN	IRAK3
220034_at	166.363	-2.17148	1.86e-05	DOWN	IRAK3
223165_s_at	2285.89	1.08354	0.010281	UP	IP6K2
207252_at	36.4908	1.7148	0.0410451	UP	INE1
205798_at	3164.53	-1.51289	0.0133572	DOWN	IL7R
226218_at	2391.53	-2.14171	0.00038201	DOWN	IL7R
226333_at	1019.37	-1.17687	0.026269	DOWN	IL6R
230966_at	185.797	-2.56622	3.21e-05	DOWN	IL4I1
205291_at	519.658	-1.66565	0.00014872	DOWN	IL2RB
206341_at	180.78	-1.87345	6.3e-05	DOWN	IL2RA
211269_s_at	221.704	-1.41595	0.00599237	DOWN	IL2RA
222062_at	326.093	-1.01067	0.00595006	DOWN	IL27RA
221111_at	56.0694	-2.04771	0.0216122	DOWN	IL26
237493_at	52.6952	-1.58828	0.0362056	DOWN	IL22RA2
221165_s_at	131.445	-1.5378	0.0399578	DOWN	IL22
222974_at	163.174	-3.71491	0.000274534	DOWN	IL22
221658_s_at	156.692	-2.58271	0.000411593	DOWN	IL21R
237753_at	202.96	-1.50461	0.00139757	DOWN	IL21R
212657_s_at	4065.28	-3.33628	0.00051518	DOWN	IL1RN
212659_s_at	736.265	-2.02546	0.0362038	DOWN	IL1RN
216243_s_at	532.975	-2.28409	0.0391408	DOWN	IL1RN
202948_at	2354.2	-1.56129	1.32e-05	DOWN	IL1R1
205067_at	4691.2	-3.33991	2.94e-09	DOWN	IL1B
39402_at	3960.11	-3.08537	1.11e-08	DOWN	IL1B
210118_s_at	279.015	-3.4823	0.000360526	DOWN	IL1A
207072_at	249.258	-2.41115	2.92e-06	DOWN	IL18RAP
206618_at	203.938	-1.53687	0.000194832	DOWN	IL18R1
222868_s_at	601.61	-1.27393	1.03e-05	DOWN	IL18BP
224283_x_at	141.354	-1.21515	0.00105229	DOWN	IL18BP
206295_at	1526.72	-1.20749	0.00965016	DOWN	IL18
216876_s_at	187.162	-2.67347	0.0424778	DOWN	IL17A
209827_s_at	580.358	-1.08909	0.0134329	DOWN	IL16
205992_s_at	597.531	-1.24586	0.00230889	DOWN	IL15
217371_s_at	194.916	-1.27693	1.88e-05	DOWN	IL15
1552584_at	310.738	-1.47434	0.000107019	DOWN	IL12RB1
204912_at	1113.54	-1.78776	2.14e-05	DOWN	IL10RA
227030_at	456.824	-1.34643	0.0056633	DOWN	IKZF3
205038_at	163.045	-1.84873	0.00175782	DOWN	IKZF1
205039_s_at	420.156	-1.05228	0.0256739	DOWN	IKZF1
227344_at	420.678	-1.71755	9.45e-05	DOWN	IKZF1
227346_at	833.725	-1.70183	3.54e-05	DOWN	IKZF1
206420_at	1017.71	-2.40366	2.68e-06	DOWN	IGSF6
241068_at	214.078	-2.34984	8.51e-05	DOWN	IGSF6
215777_at	826.174	-3.432	5.45e-08	DOWN	IGLV4-60
216430_x_at	624.174	-2.18524	0.00114348	DOWN	IGLV1-44
216573_at	283.719	-1.5171	0.016776	DOWN	IGLV1-44
217227_x_at	4505.11	-1.85291	0.0479847	DOWN	IGLV1-44
217258_x_at	3467.05	-2.34906	0.00694075	DOWN	IGLV1-44
217235_x_at	13088.3	-1.90077	0.00261263	DOWN	IGLL5
217148_x_at	23453.6	-1.76508	0.00335862	DOWN	IGLC1
233969_at	83.438	-4.31396	3.08e-07	DOWN	IGLC1
211655_at	300.073	-2.15387	0.000226185	DOWN	IGLC1
217138_x_at	332.429	-1.35541	0.0144102	DOWN	IGLC1
217378_x_at	21027.3	-2.13442	0.000423735	DOWN	IGKV1OR2-108
216401_x_at	13157.9	-1.61378	0.0198774	DOWN	IGKV1-37
211645_x_at	18628.6	-1.88898	0.00169681	DOWN	IGKV1-17
211835_at	149.653	-3.04482	0.000131202	DOWN	IGKC
214768_x_at	12735.1	-2.08539	0.0279458	DOWN	IGKC
215217_at	310.326	-1.11936	0.0187246	DOWN	IGKC
216207_x_at	21269	-1.37992	0.0375205	DOWN	IGKC
216517_at	633.261	-2.47587	0.0257558	DOWN	IGKC
211643_x_at	11179	-1.93008	0.00521045	DOWN	IGK
211644_x_at	24777.7	-1.31451	0.0289624	DOWN	IGK
214836_x_at	20741	-1.32108	0.0059117	DOWN	IGK
216576_x_at	13608.8	-1.55741	0.0250823	DOWN	IGK
216829_at	612.46	-2.46805	4.25e-05	DOWN	IGK
217145_at	340.785	-2.31952	0.00150418	DOWN	IGK
217157_x_at	7826.58	-3.03106	3.54e-08	DOWN	IGK
211908_x_at	1821.91	-1.46021	0.0103045	DOWN	IGK
211642_at	508.934	-3.15234	0.0268961	DOWN	IGHV3-73
209374_s_at	19789.4	-2.5579	2.67e-07	DOWN	IGHM
212827_at	657.562	-1.46911	0.00450732	DOWN	IGHM
211640_x_at	1832.01	-2.83688	0.0292694	DOWN	IGHG1
217369_at	246.72	-1.07127	0.0159636	DOWN	IGHG1
213674_x_at	253.684	-3.09706	0.0251181	DOWN	IGHD
222285_at	30.9114	-2.17899	0.00573252	DOWN	IGHD
214916_x_at	9684.91	-2.5942	0.00316019	DOWN	IGHA1
211650_x_at	2855.84	-1.49262	0.0433944	DOWN	IGH
211868_x_at	3515.77	-2.2972	0.00017304	DOWN	IGH
217236_x_at	576.723	-1.16207	0.0260546	DOWN	IGH
219690_at	561.528	-1.11858	0.0091162	DOWN	IGFLR1
1557395_at	14.2109	1.97753	0.0492067	UP	IGFBP7-AS1
205302_at	72.5024	2.51979	0.0256739	UP	IGFBP1
203628_at	1360.58	1.5412	0.00023194	UP	IGF1R
209540_at	318.53	-1.18591	0.00554971	DOWN	IGF1
210354_at	228.808	-3.13574	0.00136526	DOWN	IFNG
203595_s_at	864.751	-1.0179	0.0132976	DOWN	IFIT5
204747_at	1179.86	-2.13512	0.00144392	DOWN	IFIT3
229450_at	2225.23	-1.86864	0.0104095	DOWN	IFIT3
217502_at	443.366	-1.78655	0.0112108	DOWN	IFIT2
226757_at	1124.08	-2.0232	0.00224263	DOWN	IFIT2
219209_at	992.513	-1.17221	0.0143372	DOWN	IFIH1
204439_at	122.578	-2.25058	0.0124923	DOWN	IFI44L
201422_at	9226.8	-1.68509	5.96e-06	DOWN	IFI30
206332_s_at	2943.95	-1.05688	0.0128746	DOWN	IFI16
208965_s_at	1147.56	-1.05138	0.0293462	DOWN	IFI16
208966_x_at	3247.45	-1.37163	0.000629774	DOWN	IFI16
226552_at	334.814	1.0958	0.015275	UP	IER5L
210029_at	3741.3	-5.2927	4.24e-12	DOWN	IDO1
210439_at	113.148	-3.00012	5.66e-06	DOWN	ICOS
202637_s_at	1312.86	-2.42788	2.28e-05	DOWN	ICAM1
202638_s_at	1167.26	-2.42697	2.43e-05	DOWN	ICAM1
226879_at	458.885	-1.06578	0.00365142	DOWN	HVCN1
117_at	271.339	-1.61252	0.00592685	DOWN	HSPA6
213418_at	452.739	-1.98317	0.00350328	DOWN	HSPA6
202557_at	1106.01	-1.07189	4.27e-05	DOWN	HSPA13
202558_s_at	779.127	-1.32396	0.000101794	DOWN	HSPA13
232275_s_at	25.4422	2.07712	0.0356195	UP	HS6ST3
225263_at	944.121	-1.16639	0.00086607	DOWN	HS6ST1
227361_at	516.905	-1.90386	0.000184212	DOWN	HS3ST3B1
205579_at	454.946	-1.34372	0.00243089	DOWN	HRH1
221122_at	667.617	-1.73187	0.0178629	DOWN	HRASLS2
219403_s_at	964.622	-1.35817	0.00155829	DOWN	HPSE
222881_at	271.429	-1.25494	0.0245751	DOWN	HPSE
207397_s_at	90.9269	3.90509	0.00848295	UP	HOXD13
207398_at	56.9808	3.44618	0.000320908	UP	HOXD13
236681_at	300.216	3.65437	0.00110205	UP	HOXD13
229400_at	354.006	2.45791	0.00117828	UP	HOXD10
238847_at	46.0257	2.50763	0.0305065	UP	HOXD10
229667_s_at	229.766	1.55576	0.0197179	UP	HOXB8
205365_at	98.6733	1.45411	0.0117754	UP	HOXB6
228904_at	1515.87	1.06703	0.0386128	UP	HOXB3
1564070_s_at	202.824	1.388	0.0178986	UP	HOTTIP
224348_s_at	39.6759	3.26231	0.00411327	UP	HOTS
214438_at	324.267	-1.45132	0.00192617	DOWN	HLX
221978_at	683.729	-1.27996	0.0177876	DOWN	HLA-F
200905_x_at	19527.2	-1.08398	0.000253394	DOWN	HLA-E
217456_x_at	6375.64	-1.11486	0.00108916	DOWN	HLA-E
209728_at	120.647	-1.68084	0.0475005	DOWN	HLA-DRB4
204670_x_at	15614.6	-1.34879	1.2e-08	DOWN	HLA-DRB1
208306_x_at	20038.4	-1.07576	4.25e-05	DOWN	HLA-DRB1
208894_at	20507.8	-1.53655	1.11e-06	DOWN	HLA-DRA
210982_s_at	14947.2	-1.5705	2.9e-06	DOWN	HLA-DRA
209312_x_at	21227.4	-1.3045	4.72e-06	DOWN	HLA-DQB1
211656_x_at	2432.92	-1.2913	0.0267622	DOWN	HLA-DQB1
212998_x_at	4913.58	-1.61014	5.45e-06	DOWN	HLA-DQB1
212999_x_at	1197.9	-1.88856	0.0103045	DOWN	HLA-DQB1
215193_x_at	18228.5	-1.4162	3.73e-05	DOWN	HLA-DQB1
211654_x_at	4776.9	-1.77108	0.000686979	DOWN	HLA-DQB1
212671_s_at	6092.6	-1.51251	0.000624064	DOWN	HLA-DQA1
211991_s_at	8501.66	-1.48003	7.31e-08	DOWN	HLA-DPA1
213537_at	974.812	-1.87795	0.000612212	DOWN	HLA-DPA1
205671_s_at	327.777	-1.82714	0.00139757	DOWN	HLA-DOB
206313_at	88.2703	-1.51022	0.0246632	DOWN	HLA-DOA
217001_x_at	90.4108	1.83209	0.000126039	UP	HLA-DOA
226878_at	672.419	-1.46984	2.33e-06	DOWN	HLA-DOA
203932_at	4085.58	-1.85846	1.42e-09	DOWN	HLA-DMB
217478_s_at	3001.41	-1.80506	3.67e-10	DOWN	HLA-DMA
205936_s_at	101.019	-3.82521	1.6e-06	DOWN	HK3
202934_at	6431.19	-1.37961	0.00334646	DOWN	HK2
235122_at	242.32	-1.20541	0.0488465	DOWN	HIVEP3
200989_at	10026.8	-1.14704	0.000205814	DOWN	HIF1A
209960_at	162.653	-1.30556	0.0399229	DOWN	HGF
217168_s_at	8964.94	-1.05457	0.000226798	DOWN	HERPUD1
228230_at	270.685	-1.23834	0.0209866	DOWN	HELZ2
220085_at	482.186	1.36	0.0179565	UP	HELLS
206082_at	1105.1	-1.07836	0.0243679	DOWN	HCP5
202957_at	2568.44	-1.49548	0.000480996	DOWN	HCLS1
208018_s_at	1615.21	-2.20833	9.32e-07	DOWN	HCK
205220_at	4330.66	-4.18638	2.96e-05	DOWN	HCAR3
209116_x_at	9186.33	1.83743	0.0126747	UP	HBB
211696_x_at	11864	1.63077	0.0254537	UP	HBB
217232_x_at	8935.74	1.74809	0.0163606	UP	HBB
204018_x_at	12056.7	1.66553	0.0165775	UP	HBA1
209458_x_at	13073.6	1.72166	0.0116686	UP	HBA1
211699_x_at	9540.81	1.89197	0.00722769	UP	HBA1
211745_x_at	14669.2	1.68139	0.0129935	UP	HBA1
214414_x_at	15763	1.36327	0.0310817	UP	HBA1
217414_x_at	9196.91	1.73514	0.01145	UP	HBA1
235458_at	349.425	-1.46176	0.000169083	DOWN	HAVCR2
207052_at	123.199	1.87688	0.0126193	UP	HAVCR1
227262_at	463.193	-1.49328	0.00368601	DOWN	HAPLN3
230204_at	578.728	-1.23428	0.0348656	DOWN	HAPLN1
238275_at	24.8923	1.55931	0.0280299	UP	HAP1
208886_at	3241.14	1.06822	0.0262434	UP	H1F0
224646_x_at	2535.16	4.39907	0.00414109	UP	H19
224997_x_at	529.188	2.92819	0.0391361	UP	H19
205488_at	1010.91	-1.5638	7.53e-05	DOWN	GZMA
202947_s_at	991.578	-1.04577	0.0103583	DOWN	GYPC
227829_at	179.48	1.08644	0.0176891	UP	GYLTL1B
220506_at	42.2911	2.42355	0.00838325	UP	GUCY1B2
205274_at	36.4648	1.5025	0.0349022	UP	GTPBP1
1569058_at	17.1336	2.05519	0.0265284	UP	GTF3C3
238880_at	762.386	1.17116	0.0332816	UP	GTF3A
1557289_s_at	102.687	1.97622	0.0321494	UP	GTF2IRD2
218412_s_at	947.569	1.18571	0.00146901	UP	GTF2IRD1
235867_at	180.452	-1.05452	0.0281558	DOWN	GSTM3
206326_at	42.5653	2.1976	0.0222484	UP	GRP
216255_s_at	28.2832	3.1477	7.31e-05	UP	GRM8
207299_s_at	17.7372	2.34633	0.0235251	UP	GRM1
233220_at	132.905	-4.19171	1.53e-09	DOWN	GRIN3A
243907_at	59.9233	1.29943	0.0178994	UP	GREB1L
1570186_at	19.9366	2.03939	0.0380128	UP	GRASPOS
205240_at	520.411	1.09937	0.0452335	UP	GPSM2
230002_at	963.037	1.44932	0.00264501	UP	GPSM2
206747_at	570.501	1.05467	0.0337779	UP	GPRIN2
221297_at	109.206	-1.8035	0.0231016	DOWN	GPRC5D
1553723_at	94.1174	-2.29623	0.00056193	DOWN	GPR97
220404_at	204.189	-1.57481	0.00438817	DOWN	GPR97
234303_s_at	38.1466	-1.94813	0.0204601	DOWN	GPR85
223767_at	302.378	-3.38141	5.52e-07	DOWN	GPR84
1553317_s_at	82.7972	-2.07522	0.00370604	DOWN	GPR82
214467_at	489.803	-2.40532	9.75e-07	DOWN	GPR65
205419_at	485.164	-1.53708	0.0103725	DOWN	GPR183
1556019_at	36.8465	-1.95095	0.00828031	DOWN	GPR180
210279_at	282.591	-1.76756	1.77e-05	DOWN	GPR18
207651_at	210.314	-1.75835	0.0207815	DOWN	GPR171
223887_at	92.2724	-2.32086	0.00100518	DOWN	GPR132
1569542_at	170.045	1.33827	0.0329861	UP	GPR125
1554018_at	192.54	-1.69014	0.000154385	DOWN	GPNMB
201141_at	4757.69	-1.32074	0.00166119	DOWN	GPNMB
209167_at	350.851	-1.04541	0.0303969	DOWN	GPM6B
1563034_at	15.9251	1.77255	0.0397049	UP	GPD1
224826_at	939.984	-1.10868	0.0197282	DOWN	GPCPD1
227059_at	586.089	-1.29374	0.00158403	DOWN	GPC6
228068_at	41.6993	2.50331	0.0189807	UP	GOLGA7B
37145_at	375.216	-2.25081	7.1e-05	DOWN	GNLY
222109_at	83.5296	1.58393	0.0166229	UP	GNL3L
206896_s_at	404.002	-1.41702	0.0021159	DOWN	GNG7
205184_at	173.314	1.85025	0.0279647	UP	GNG4
224964_s_at	922.727	-1.40451	0.00037499	DOWN	GNG2
225710_at	1294.82	-1.15599	0.00113781	DOWN	GNB4
206356_s_at	39.3863	1.54903	0.0322804	UP	GNAL
204220_at	1173.14	-1.27972	0.000457243	DOWN	GMFG
229770_at	136.847	-1.59717	0.0451886	DOWN	GLT1D1
1564706_s_at	24.8164	2.36454	0.0151318	UP	GLS2
206662_at	9786.01	-1.42445	0.000317255	DOWN	GLRX
209276_s_at	5309.26	-1.41933	0.000433332	DOWN	GLRX
207462_at	28.0905	1.89359	0.043154	UP	GLRA2
225706_at	1184.18	-1.31319	0.00275358	DOWN	GLCCI1
227525_at	1399.45	-1.57136	4.41e-05	DOWN	GLCCI1
213713_s_at	770.507	1.12563	0.00223107	UP	GLB1L2
215966_x_at	396.541	-1.99899	0.00671692	DOWN	GK3P
207387_s_at	646.13	-2.00546	0.000505435	DOWN	GK
214681_at	810.763	-1.98277	0.000140965	DOWN	GK
215977_x_at	449.011	-2.30912	0.000274534	DOWN	GK
217167_x_at	380.096	-2.21332	0.000151072	DOWN	GK
201667_at	3317.71	-1.21573	0.000657717	DOWN	GJA1
235306_at	736.631	-1.51489	6.11e-05	DOWN	GIMAP8
228071_at	773.174	-1.25292	1.45e-05	DOWN	GIMAP7
219777_at	775.883	-1.53692	6.71e-07	DOWN	GIMAP6
229367_s_at	498.085	-1.39465	1.22e-07	DOWN	GIMAP6
219243_at	921.126	-1.34194	0.00137237	DOWN	GIMAP4
218805_at	1043.27	-1.29789	1.86e-05	DOWN	GIMAP1-GIMAP5
1552315_at	232.896	-1.02204	0.000178588	DOWN	GIMAP1
1552316_a_at	413.547	-1.03801	0.00289061	DOWN	GIMAP1
1552318_at	133.155	-1.49278	0.0220586	DOWN	GIMAP1
211545_at	15.9451	2.19584	0.0324164	UP	GHRHR
228376_at	589.662	-1.11447	0.00257265	DOWN	GGTA1P
213343_s_at	186.334	1.73169	0.0254995	UP	GDPD5
221577_x_at	1518.7	1.71601	0.00718561	UP	GDF15
204224_s_at	2813.02	-1.42433	0.000217021	DOWN	GCH1
203765_at	1172.1	-1.05142	0.0153591	DOWN	GCA
229625_at	632.53	-3.67466	3.54e-08	DOWN	GBP5
238581_at	515.701	-4.26032	6.98e-05	DOWN	GBP5
235175_at	551.237	-2.20459	5.2e-07	DOWN	GBP4
235574_at	161.787	-2.52259	0.00051518	DOWN	GBP4
202748_at	2167.31	-1.87638	2.4e-07	DOWN	GBP2
242907_at	1352.07	-1.27369	0.00882545	DOWN	GBP2
202269_x_at	4706.6	-2.4022	3.08e-07	DOWN	GBP1
202270_at	3449.7	-3.20416	3.37e-09	DOWN	GBP1
231577_s_at	6893.38	-2.68227	9.73e-08	DOWN	GBP1
231578_at	151.412	-3.26593	5.87e-05	DOWN	GBP1
236118_at	466.96	1.19835	0.0138401	UP	GATA6-AS1
205848_at	110.413	2.08284	0.0266241	UP	GAS2
244822_at	114.382	1.39746	0.0196245	UP	GART
1552474_a_at	100.215	-1.2159	0.0358164	DOWN	GAMT
217787_s_at	508.12	-1.11525	0.00781588	DOWN	GALNT2
223991_s_at	510.388	-1.14788	0.00112961	DOWN	GALNT2
205670_at	169.194	1.63103	0.0479296	UP	GAL3ST1
207574_s_at	1210.68	-1.85626	0.000657717	DOWN	GADD45B
209304_x_at	706.048	-1.95349	0.00311301	DOWN	GADD45B
209305_s_at	411.869	-1.56837	0.00576993	DOWN	GADD45B
213560_at	81.1865	-1.97586	0.0405827	DOWN	GADD45B
242344_at	161.451	1.68115	0.0269388	UP	GABRB2
205890_s_at	3952.64	-3.00356	1.41e-07	DOWN	GABBR1
228410_at	176.81	-1.34147	0.0433944	DOWN	GAB3
213524_s_at	2434.41	-2.30055	0.000220854	DOWN	G0S2
219764_at	96.4907	-1.5757	0.0492314	DOWN	FZD10
205285_s_at	277.113	-1.53759	0.00636375	DOWN	FYB
211794_at	315.319	-2.64741	0.000151072	DOWN	FYB
211795_s_at	661.031	-2.31925	1.66e-06	DOWN	FYB
227266_s_at	875.81	-2.02933	4.09e-07	DOWN	FYB
226145_s_at	259.571	1.56805	0.0153591	UP	FRAS1
230422_at	740.353	-1.66202	4.86e-05	DOWN	FPR3
210772_at	365.193	-3.28666	0.00356303	DOWN	FPR2
210773_s_at	225.295	-2.83834	0.0245751	DOWN	FPR2
205119_s_at	2056.83	-2.77341	1.9e-05	DOWN	FPR1
206307_s_at	143.951	2.52834	0.0365436	UP	FOXD1
40284_at	1176.84	1.29586	0.0381549	UP	FOXA2
218880_at	733.417	-1.25082	0.0024846	DOWN	FOSL2
209189_at	2379.19	-1.40802	0.0474137	DOWN	FOS
229865_at	378.602	-1.30848	0.016776	DOWN	FNDC3B
1569688_at	185.035	2.29154	0.00016727	UP	FMO5
205666_at	114.408	-2.31882	0.00899117	DOWN	FMO1
219316_s_at	365.204	-1.26337	0.0318077	DOWN	FLVCR2
222866_s_at	359.094	-1.0677	0.0149576	DOWN	FLVCR2
1557895_at	133.234	1.12039	0.00859475	UP	FLJ35934
235291_s_at	202.392	-1.01362	0.0397818	DOWN	FLJ32255
243077_at	206.973	1.14858	0.00506725	UP	FLJ16734
204236_at	450.193	-1.67678	5.47e-05	DOWN	FLI1
210786_s_at	171.177	-1.02236	0.0147028	DOWN	FLI1
219117_s_at	9083.92	-1.11653	0.00785838	DOWN	FKBP11
219118_at	3154.34	-1.27199	0.00556123	DOWN	FKBP11
208438_s_at	536.394	-1.84787	0.00163036	DOWN	FGR
204834_at	2378.73	-1.7096	5.22e-08	DOWN	FGL2
227265_at	3716.57	-1.736	1.24e-06	DOWN	FGL2
1554741_s_at	229.078	-1.32915	0.0167526	DOWN	FGF7
231382_at	88.0698	2.07237	0.0203973	UP	FGF18
221385_s_at	55.1063	-2.25108	0.0214652	DOWN	FFAR3
221345_at	315.298	-4.14845	0.000702054	DOWN	FFAR2
233972_s_at	17.0551	2.05136	0.0251647	UP	FEZF2
203562_at	410.532	-1.00769	0.0281917	DOWN	FEZ1
224404_s_at	331.783	-1.59603	0.0159295	DOWN	FCRL5
224405_at	129.632	-1.5624	0.00258575	DOWN	FCRL5
224406_s_at	428.594	-2.09736	0.00556123	DOWN	FCRL5
231647_s_at	307.642	-2.14916	0.00193856	DOWN	FCRL5
235982_at	28.8569	-1.9564	0.0164594	DOWN	FCRL1
205866_at	169.077	-1.58327	0.0148958	DOWN	FCN3
205237_at	480.276	-2.18606	0.000320908	DOWN	FCN1
204007_at	3064.62	-3.55559	4.34e-05	DOWN	FCGR3B
204006_s_at	710.393	-2.07864	0.00585947	DOWN	FCGR3A
210992_x_at	489.896	-2.60774	0.00609429	DOWN	FCGR2C
211395_x_at	766.44	-1.91646	0.00181188	DOWN	FCGR2C
210889_s_at	563.044	-2.0391	0.00435014	DOWN	FCGR2B
203561_at	1378.71	-2.40198	0.000185418	DOWN	FCGR2A
214511_x_at	568.118	-2.06033	1.39e-05	DOWN	FCGR1B
216950_s_at	551.848	-2.13598	4.28e-06	DOWN	FCGR1A
1554899_s_at	1997.14	-2.00281	5.3e-07	DOWN	FCER1G
204232_at	3396.38	-1.74532	4.72e-06	DOWN	FCER1G
207674_at	51.4823	-2.32717	0.00258029	DOWN	FCAR
218751_s_at	326.94	-1.19883	0.0328624	DOWN	FBXW7
231769_at	1019.96	-2.04425	3.54e-08	DOWN	FBXO6
203886_s_at	71.479	-2.61045	0.0120327	DOWN	FBLN2
232063_x_at	275.653	1.07322	0.0121988	UP	FARSB
1554337_at	31.2257	1.89496	0.0198894	UP	FARP2
227996_at	406.052	1.70061	0.000393615	UP	FARP1
232968_at	210.505	1.17542	0.0204601	UP	FANK1
234049_at	18.4901	2.23772	0.0223647	UP	FAM86B3P
238460_at	56.2733	-2.0195	0.0241382	DOWN	FAM83A
227002_at	382.086	-1.04598	0.0323553	DOWN	FAM78A
227654_at	242.808	-1.22743	0.0213272	DOWN	FAM65C
206707_x_at	237.232	-1.98563	0.0016716	DOWN	FAM65B
209829_at	277.745	-2.56223	6.37e-05	DOWN	FAM65B
208092_s_at	361.752	-2.09668	3.95e-07	DOWN	FAM49A
209683_at	202.584	-1.97855	4.25e-05	DOWN	FAM49A
230276_at	140.208	-1.66147	0.0038711	DOWN	FAM49A
220306_at	538.181	-1.32473	0.0176602	DOWN	FAM46C
226811_at	3565.25	-1.61866	0.00674303	DOWN	FAM46C
228362_s_at	86.6928	-2.44216	0.00384761	DOWN	FAM26F
229390_at	2466.83	-3.05554	1.33e-08	DOWN	FAM26F
229391_s_at	1270.51	-2.72668	3.18e-08	DOWN	FAM26F
229915_at	41.2185	-2.2142	0.0107916	DOWN	FAM26F
226722_at	741.563	-1.19336	0.0138401	DOWN	FAM20C
226804_at	52.4309	-2.77019	0.00730428	DOWN	FAM20A
236321_at	273.764	1.32382	0.0445105	UP	FAM200B
230923_at	64.4588	-2.14906	0.0367202	DOWN	FAM19A1
1556373_a_at	535.144	1.13751	0.0356227	UP	FAM185A
242762_s_at	26.3466	2.51014	0.0021562	UP	FAM171B
217966_s_at	627.051	-1.50892	0.00430305	DOWN	FAM129A
217967_s_at	1164.73	-1.53893	0.000922555	DOWN	FAM129A
223058_at	2194.65	-1.05154	0.0482937	DOWN	FAM107B
230147_at	442.628	-1.42965	0.0446408	DOWN	F2RL2
214734_at	1912.02	1.43172	0.0103444	UP	EXPH5
204503_at	379.129	1.4597	0.00193409	UP	EVPL
217838_s_at	618.906	-1.02542	0.00541443	DOWN	EVL
211742_s_at	1833.5	-1.83438	2.88e-07	DOWN	EVI2B
204774_at	856.207	-1.62399	1.65e-06	DOWN	EVI2A
1555256_at	25.277	1.89651	0.0140876	UP	EVC2
1554576_a_at	256.532	2.55652	0.0215487	UP	ETV4
211603_s_at	177.73	2.11408	0.0224487	UP	ETV4
1555355_a_at	255.266	-1.12945	0.00264619	DOWN	ETS1
219017_at	2597.02	-1.78945	0.000801153	DOWN	ETNK1
222262_s_at	943.006	-1.79033	0.00112273	DOWN	ETNK1
224453_s_at	239.153	-1.67795	0.00220934	DOWN	ETNK1
205225_at	94.8383	-1.11416	0.0187246	DOWN	ESR1
222139_at	84.5724	-1.85305	0.00703708	DOWN	ERV3-2
224657_at	2458.56	-1.31559	0.0149526	DOWN	ERRFI1
220012_at	125.601	-1.83165	0.0176735	DOWN	ERO1LB
231944_at	176.597	-1.00452	0.00112728	DOWN	ERO1LB
218498_s_at	854.088	-1.11025	0.0296083	DOWN	ERO1L
230368_at	107.678	1.41242	0.0243362	UP	ERF
226213_at	9554.03	1.04438	0.0116996	UP	ERBB3
1570371_a_at	91.6923	2.0932	0.0139744	UP	EPT1
203463_s_at	153.217	-1.7606	0.00368153	DOWN	EPN2
220153_at	261.304	-1.023	0.0148958	DOWN	ENTPD7
230430_at	110.507	2.4036	0.000188459	UP	ENTPD2
207691_x_at	628.814	-1.36219	0.00177365	DOWN	ENTPD1
209474_s_at	470.986	-1.59129	0.00123206	DOWN	ENTPD1
236737_at	32.8279	-1.80223	0.00141504	DOWN	ENTHD2
238980_x_at	51.5779	1.3933	0.00181839	UP	ENTHD2
1552394_a_at	17.0034	-2.16245	0.0475113	DOWN	ENTHD1
209392_at	2135.84	-1.35658	0.000421835	DOWN	ENPP2
210839_s_at	1000.47	-1.47208	4.25e-05	DOWN	ENPP2
207610_s_at	446.207	-2.48419	4.62e-05	DOWN	EMR2
207111_at	235.52	-1.87012	0.00415737	DOWN	EMR1
203729_at	1755.99	-1.18481	0.0354537	DOWN	EMP3
204797_s_at	318.792	-1.30937	0.0283863	DOWN	EML1
238709_at	85.8502	1.33315	0.0352903	UP	ELP2
210868_s_at	791.193	-1.13159	0.0214652	DOWN	ELOVL6
204513_s_at	325.675	-1.01303	0.00139314	DOWN	ELMO1
214446_at	182.356	-1.95281	0.0131718	DOWN	ELL2
226099_at	1780.97	-1.71221	0.000320908	DOWN	ELL2
201766_at	56.173	1.72955	0.043154	UP	ELAC2
230570_at	683.303	1.8587	0.0074835	UP	EIF3H
236700_at	279.492	1.52019	0.0042136	UP	EIF3C
242898_at	137.872	1.68111	0.000411593	UP	EIF2AK2
209037_s_at	485.737	-1.13023	0.0258276	DOWN	EHD1
222221_x_at	576.094	-1.03768	0.0280081	DOWN	EHD1
206115_at	296.056	-1.55594	0.00187717	DOWN	EGR3
205249_at	266.41	-1.74816	0.000159568	DOWN	EGR2
210132_at	504.895	1.28023	0.0076941	UP	EFNA3
1564630_at	111.592	1.23604	0.0380661	UP	EDN1
208142_at	20.8897	-1.92046	0.0375724	DOWN	EDDM3A
220048_at	338.815	1.08941	0.0353346	UP	EDAR
231320_at	78.6537	1.51228	0.0303615	UP	EBP
219424_at	128.683	-2.11454	0.000260089	DOWN	EBI3
219551_at	935.097	-1.38245	0.00296572	DOWN	EAF2
218660_at	771.457	-1.21808	0.0107231	DOWN	DYSF
217270_s_at	99.2153	1.36699	0.0174305	UP	DYRK1B
208892_s_at	2025.8	-1.16428	0.0189419	DOWN	DUSP6
209457_at	1112.87	-1.60115	0.0157229	DOWN	DUSP5
219144_at	144.692	-1.12667	0.0257366	DOWN	DUSP26
201041_s_at	5081.15	-1.45558	0.00222547	DOWN	DUSP1
216918_s_at	35.3316	1.32033	0.0212727	UP	DST
218854_at	1070.38	-1.81463	0.000186083	DOWN	DSE
218627_at	1110.75	-1.21359	0.00485529	DOWN	DRAM1
204646_at	1065.93	-1.88904	0.000109454	DOWN	DPYD
213068_at	145.765	-1.55986	0.0181556	DOWN	DPT
219452_at	140.496	-1.79945	0.0421121	DOWN	DPEP2
205983_at	537.448	3.3858	0.00187717	UP	DPEP1
223553_s_at	535.189	-1.75972	0.000222914	DOWN	DOK3
225502_at	776.256	-1.55283	9e-05	DOWN	DOCK8
232843_s_at	431.46	-1.2785	0.00341923	DOWN	DOCK8
205003_at	583.705	-1.65832	0.000258705	DOWN	DOCK4
213160_at	478.226	-1.48734	9.6e-05	DOWN	DOCK2
219279_at	425.697	-1.81093	1.36e-07	DOWN	DOCK10
213871_s_at	58.4275	-1.71785	0.00931102	DOWN	DNPH1
220139_at	29.3203	1.84419	0.0345247	UP	DNMT3L
215116_s_at	162.511	1.35477	0.0378902	UP	DNM1
205554_s_at	3384.91	-1.56631	0.000648257	DOWN	DNASE1L3
241854_at	110.112	1.56096	8.79e-05	UP	DNASE1
1554462_a_at	1568.43	-1.22622	0.0019657	DOWN	DNAJB9
202842_s_at	3446.35	-1.42778	2.99e-08	DOWN	DNAJB9
202843_at	538.725	-1.34341	1.05e-06	DOWN	DNAJB9
215173_at	23.7834	-1.8668	0.0337051	DOWN	DNAAF1
1554880_at	84.6721	1.23905	0.0323006	UP	DKFZP434K028
231416_at	20.3317	1.68392	0.0370189	UP	DHDH
227415_at	1088.71	1.39641	0.00263641	UP	DGKH
235952_at	327.371	1.94015	7.49e-06	UP	DGKH
240145_at	173.098	1.16568	0.0177912	UP	DGKH
214024_s_at	42.5892	1.38168	0.0336204	UP	DGCR6L
1558348_at	193.265	1.21454	0.00876461	UP	DET1
229721_x_at	1682.36	-1.83751	0.00155829	DOWN	DERL3
236415_at	26.9057	2.07462	0.00770545	UP	DENND5B
212561_at	670.176	-1.05472	0.0480903	DOWN	DENND5A
238524_at	208.508	-1.10283	0.0031109	DOWN	DENND2D
207356_at	1166.16	-6.19464	3.3e-07	DOWN	DEFB4A
228152_s_at	791.717	-1.46919	0.00215823	DOWN	DDX60L
218986_s_at	2198.92	-1.32306	0.0241382	DOWN	DDX60
225442_at	877.762	-1.13731	0.0123879	DOWN	DDR2
219116_s_at	175.727	1.06421	0.0280063	UP	DCUN1D2
211896_s_at	4877.98	-1.21852	0.02808	DOWN	DCN
222234_s_at	98.9531	1.45955	0.0472057	UP	DBNDD1
219290_x_at	903.145	-1.63589	0.00165137	DOWN	DAPP1
222859_s_at	528.912	-2.35523	6.37e-05	DOWN	DAPP1
229290_at	65.1264	1.90959	0.0019657	UP	DAPL1
205471_s_at	805.226	1.26363	0.0164682	UP	DACH1
205472_s_at	313.466	1.58334	0.00204815	UP	DACH1
212793_at	378.323	-1.08757	0.000671038	DOWN	DAAM2
209606_at	1368.11	-1.96629	5.62e-06	DOWN	CYTIP
219183_s_at	524.7	-1.32982	0.0264218	DOWN	CYTH4
208367_x_at	65.1391	2.49087	0.016776	UP	CYP3A4
244407_at	105.321	1.77921	0.00027525	UP	CYP39A1
216720_at	21.524	2.44978	0.04102	UP	CYP2U1
223385_at	755.068	1.46171	0.000264424	UP	CYP2S1
221903_s_at	779.703	-1.33296	4.16e-05	DOWN	CYLD
203922_s_at	417.291	-1.74221	7.57e-05	DOWN	CYBB
203923_s_at	921.209	-1.4758	0.000591307	DOWN	CYBB
206974_at	352.738	-1.43821	4.43e-05	DOWN	CXCR6
211469_s_at	218.281	-1.74227	6.66e-06	DOWN	CXCR6
217028_at	1929.92	-1.25443	0.0191032	DOWN	CXCR4
207008_at	532.257	-2.32039	0.000163957	DOWN	CXCR2
207094_at	236.503	-2.94023	0.0224734	DOWN	CXCR1
203915_at	2664.35	-4.47725	1.25e-08	DOWN	CXCL9
206336_at	872.325	-3.5251	3.59e-05	DOWN	CXCL6
207850_at	2831.08	-2.65164	0.00694063	DOWN	CXCL3
209774_x_at	3557.44	-2.39183	0.00838325	DOWN	CXCL2
205242_at	1806	-3.28302	0.041386	DOWN	CXCL13
209687_at	1401.08	-1.68028	0.00188778	DOWN	CXCL12
210163_at	833.903	-3.70045	0.000104559	DOWN	CXCL11
211122_s_at	1095.95	-3.98163	0.000126039	DOWN	CXCL11
204533_at	3545.42	-4.27575	9.32e-14	DOWN	CXCL10
204470_at	5279.45	-2.86852	0.000834846	DOWN	CXCL1
202087_s_at	2416.65	-1.30654	0.000689466	DOWN	CTSL
205653_at	328.624	-1.71024	0.00844389	DOWN	CTSG
201487_at	6447.11	-1.17747	0.00133397	DOWN	CTSC
225646_at	3259.31	-1.51022	1.9e-05	DOWN	CTSC
225647_s_at	3996.96	-1.44121	0.000351057	DOWN	CTSC
231234_at	569.024	-1.21506	0.00414109	DOWN	CTSC
231794_at	130.887	-1.12343	0.011871	DOWN	CTLA4
236341_at	193.604	-2.72086	5.09e-05	DOWN	CTLA4
235835_at	22.159	-2.17157	0.00539514	DOWN	CTD-2619J13.17
243754_at	116.573	-1.46977	0.0353933	DOWN	CTA-384D8.35
243780_at	312.072	-1.40225	0.0356227	DOWN	CTA-250D10.23
204971_at	700.215	-1.45069	0.000500024	DOWN	CSTA
210140_at	672.911	-1.44892	0.000207448	DOWN	CST7
206994_at	368.47	2.34785	0.000142791	UP	CST4
208555_x_at	217.38	1.75028	0.00453467	UP	CST2
206224_at	692.748	6.15323	2.21e-06	UP	CST1
225557_at	635.649	-1.33538	0.0041657	DOWN	CSRNP1
242041_at	122.526	1.01514	0.0241215	UP	CSPP1
1553297_a_at	896.423	-1.88228	0.00123206	DOWN	CSF3R
203591_s_at	468.027	-2.80073	0.00193695	DOWN	CSF3R
207442_at	102.97	-3.59125	1.63e-06	DOWN	CSF3
205159_at	2325.58	-2.99892	2.78e-08	DOWN	CSF2RB
210340_s_at	119.802	-1.4021	0.0209866	DOWN	CSF2RA
210229_s_at	79.1419	-3.70298	0.00260339	DOWN	CSF2
203104_at	1234.83	-1.18312	0.000263039	DOWN	CSF1R
206914_at	92.0167	-2.2084	0.00225132	DOWN	CRTAM
238021_s_at	359.237	2.95964	5.32e-07	UP	CRNDE
238022_at	132.146	2.78014	6.08e-05	UP	CRNDE
237502_at	250.584	1.37133	0.00262801	UP	CRLS1
221541_at	2280.45	-1.31295	0.000207448	DOWN	CRISPLD2
239049_at	355.821	1.05174	0.0302514	UP	CRIPT
235720_at	69.7163	1.48848	0.017956	UP	CRIP3
1568987_at	89.5317	1.15784	0.0230678	UP	CRHR1-IT1
211897_s_at	22.8727	-2.27004	0.0161811	DOWN	CRHR1
207630_s_at	598.787	-1.39612	0.0001291	DOWN	CREM
209967_s_at	505.664	-1.40965	0.00671079	DOWN	CREM
214508_x_at	422.107	-1.45355	0.000657717	DOWN	CREM
218358_at	5058.79	-1.21984	0.00191821	DOWN	CRELD2
205544_s_at	255.78	-2.49234	0.0351767	DOWN	CR2
217552_x_at	102.017	-2.25106	0.000155062	DOWN	CR1
244313_at	325.885	-2.12177	1.32e-07	DOWN	CR1
227860_at	217.564	-2.18734	0.00263315	DOWN	CPXM1
208146_s_at	1234.52	-1.21255	1.88e-05	DOWN	CPVL
227189_at	673.428	-1.28154	0.00227369	DOWN	CPNE5
224831_at	668.087	-1.27008	0.00299683	DOWN	CPEB4
204846_at	224.783	-1.59996	0.00451854	DOWN	CP
206848_at	712.415	1.18655	0.0132976	UP	COX20
221059_s_at	3392.96	-1.01695	0.00348934	DOWN	COTL1
224583_at	2723.24	-1.07083	0.013754	DOWN	COTL1
209083_at	1607.36	-1.15159	0.00481646	DOWN	CORO1A
205713_s_at	17.2303	2.33499	0.0204701	UP	COMP
221019_s_at	426.266	-1.11403	0.00356703	DOWN	COLEC12
230867_at	20.7668	-3.57439	7.33e-05	DOWN	COL6A6
217404_s_at	22.8652	3.24915	0.0116996	UP	COL2A1
229168_at	144.523	-1.29506	0.0239592	DOWN	COL23A1
204320_at	255.374	2.62869	0.000106151	UP	COL11A1
37892_at	236.886	2.63486	0.000598636	UP	COL11A1
215145_s_at	143.153	2.78528	0.0206358	UP	CNTNAP2
229967_at	294.24	-2.10395	0.00254657	DOWN	CMTM2
229121_at	373.79	-1.96768	0.00118299	DOWN	CMKLR1
208792_s_at	1461.11	-1.31415	0.0453187	DOWN	CLU
222043_at	266.546	-2.25223	4.3e-05	DOWN	CLU
226834_at	547.167	-1.30587	4.98e-05	DOWN	CLMP
226425_at	197.441	-1.18775	0.0079576	DOWN	CLIP4
227742_at	930.894	-1.846	0.000689466	DOWN	CLIC6
213317_at	5324.16	-1.14788	0.0298783	DOWN	CLIC5
217628_at	521.766	-1.52627	0.00191473	DOWN	CLIC5
243917_at	224.153	-1.90744	0.0092349	DOWN	CLIC5
219529_at	252.453	1.38768	0.0148013	UP	CLIC3
213415_at	559.363	-1.39481	5.93e-08	DOWN	CLIC2
244413_at	152.303	-1.57321	8.97e-05	DOWN	CLECL1
1554406_a_at	183.249	-1.30086	0.00254657	DOWN	CLEC7A
1555214_a_at	37.5101	-3.17757	9.49e-07	DOWN	CLEC7A
1555756_a_at	296.193	-2.17633	9.98e-07	DOWN	CLEC7A
221698_s_at	1059.56	-2.37499	4.37e-06	DOWN	CLEC7A
222934_s_at	523.05	-3.0628	0.00044026	DOWN	CLEC4E
1552772_at	229.589	-3.01937	0.00336804	DOWN	CLEC4D
1552773_at	144.811	-1.82583	0.0233761	DOWN	CLEC4D
219947_at	720.215	-2.81545	1.45e-06	DOWN	CLEC4A
221724_s_at	438.214	-2.06192	5.47e-05	DOWN	CLEC4A
233500_x_at	91.8211	-1.58967	0.00337255	DOWN	CLEC2D
235522_at	109.574	-1.62864	0.0148885	DOWN	CLEC2D
209732_at	2504.16	-1.88413	4.85e-07	DOWN	CLEC2B
1552398_a_at	152.857	-1.60726	0.00901137	DOWN	CLEC12A
206682_at	456.96	-1.04811	0.034535	DOWN	CLEC10A
1552535_at	31.1955	2.19943	0.00462398	UP	CLDN19
214135_at	140.067	-1.01838	0.0335149	DOWN	CLDN18
216412_x_at	1582.4	-1.9795	0.000705648	DOWN	CKAP2
216984_x_at	22013.8	-1.67352	0.017789	DOWN	CKAP2
234884_x_at	2768.68	-1.9119	0.00529098	DOWN	CKAP2
205101_at	309.068	-1.87307	1.56e-06	DOWN	CIITA
203044_at	1747.78	-1.17523	0.00480088	DOWN	CHSY1
203921_at	604.483	-1.56871	0.000230502	DOWN	CHST2
243478_at	20.5562	-2.44179	0.00711285	DOWN	CHST2
203066_at	1119.59	-1.3161	0.00779976	DOWN	CHST15
219634_at	272.346	-1.97803	0.00177365	DOWN	CHST11
226368_at	416.856	-1.34551	0.00414109	DOWN	CHST11
226372_at	638.457	-1.70547	1.26e-05	DOWN	CHST11
209763_at	304.782	-2.07647	0.0132976	DOWN	CHRDL1
204591_at	250.166	-1.43977	0.013568	DOWN	CHL1
213060_s_at	360.425	-2.6484	0.000207152	DOWN	CHI3L2
209395_at	2780.11	-2.8193	0.00129953	DOWN	CHI3L1
209396_s_at	2491.96	-2.89846	0.00320325	DOWN	CHI3L1
228560_at	451.436	1.32194	0.00632769	UP	CHDH
229954_at	529.02	1.02497	0.0407414	UP	CHDH
217250_s_at	36.815	2.04505	0.0138934	UP	CHD5
206380_s_at	136.773	-3.40555	9.31e-09	DOWN	CFP
208485_x_at	1109.9	-1.07937	0.00554971	DOWN	CFLAR
209508_x_at	961.856	-1.08079	0.00470143	DOWN	CFLAR
209939_x_at	2797.26	-1.08225	0.0116366	DOWN	CFLAR
210563_x_at	2186.08	-1.20583	0.00462049	DOWN	CFLAR
211862_x_at	1202.5	-1.02346	0.00212658	DOWN	CFLAR
215388_s_at	1349.8	-1.23191	0.00175377	DOWN	CFH
202357_s_at	2635.49	-1.45503	0.000275783	DOWN	CFB
228007_at	275.199	-1.00179	0.0104719	DOWN	CEP85L
244033_at	220.985	-1.26387	0.00116492	DOWN	CEP128
207331_at	26.6343	2.07044	0.0324164	UP	CENPF
207828_s_at	869.109	1.09387	0.0293587	UP	CENPF
205165_at	61.912	1.89997	0.0372469	UP	CELSR3
40020_at	296.346	2.18443	4.47e-05	UP	CELSR3
207412_x_at	55.3139	3.8157	8.51e-05	UP	CELP
1553970_s_at	87.823	4.11639	2.86e-07	UP	CEL
205910_s_at	89.4637	3.6507	1.19e-05	UP	CEL
233695_s_at	30.1334	-1.46866	0.0368367	DOWN	CECR2
219505_at	1798.45	-1.63358	3.39e-05	DOWN	CECR1
213006_at	155.404	-1.66	0.000657717	DOWN	CEBPD
210789_x_at	175.77	-1.74083	0.000866218	DOWN	CEACAM3
206576_s_at	5977.53	-2.11022	5.15e-05	DOWN	CEACAM1
209498_at	16874.8	-1.17093	0.0249861	DOWN	CEACAM1
211883_x_at	6909.16	-1.75666	0.000384667	DOWN	CEACAM1
211889_x_at	6566.94	-1.8672	0.000122824	DOWN	CEACAM1
208279_s_at	37.0542	1.55782	0.00923986	UP	CDRT1
207039_at	119.639	2.12114	0.00864959	UP	CDKN2A
202284_s_at	3819.44	-1.49302	0.00205293	DOWN	CDKN1A
235226_at	165.87	1.1805	0.0350704	UP	CDK19
206866_at	37.4406	2.30855	0.0454083	UP	CDH4
206898_at	143.94	-1.77756	0.023837	DOWN	CDH19
230060_at	275.825	1.25234	0.0462622	UP	CDCA7
234605_at	187.358	1.57962	0.0151659	UP	CDC14B
233317_at	107.164	1.67384	0.0408509	UP	CD9
205685_at	283.303	-1.2872	0.000617981	DOWN	CD86
205686_s_at	211.288	-1.76509	0.00714915	DOWN	CD86
210895_s_at	569.481	-1.60801	8.51e-05	DOWN	CD86
204440_at	616.098	-1.04879	0.0301393	DOWN	CD83
1554519_at	184.028	-1.99025	0.00706929	DOWN	CD80
207176_s_at	173.18	-1.05512	0.00842954	DOWN	CD80
205297_s_at	278.409	-1.13973	0.0426329	DOWN	CD79B
1567628_at	2255.69	-1.5263	0.00436686	DOWN	CD74
209619_at	21209.4	-1.05285	0.00323106	DOWN	CD74
215925_s_at	136.955	-1.67725	0.00293892	DOWN	CD72
209795_at	585.07	-3.23239	1.36e-10	DOWN	CD69
203507_at	255.468	-1.32757	0.00256245	DOWN	CD68
1555950_a_at	7247.78	-1.35217	0.0167142	DOWN	CD55
201925_s_at	4564.25	-1.99631	0.000415028	DOWN	CD55
201926_s_at	6299.78	-1.54804	0.0101184	DOWN	CD55
203416_at	3729.98	-1.66331	7.74e-06	DOWN	CD53
204661_at	1302.69	-1.29968	0.00836098	DOWN	CD52
34210_at	1380.67	-1.34902	0.00212193	DOWN	CD52
204118_at	2093.95	-1.81279	5.58e-06	DOWN	CD48
237759_at	114.975	-2.48591	0.000116941	DOWN	CD48
205153_s_at	482.785	-1.73513	7.1e-05	DOWN	CD40
215346_at	535.137	-1.61494	7.29e-06	DOWN	CD40
35150_at	750.788	-1.41787	0.00019997	DOWN	CD40
203547_at	780.909	-1.17203	0.000692302	DOWN	CD4
206804_at	287.374	-1.24246	0.0233938	DOWN	CD3G
213539_at	1750.27	-1.13811	0.0031696	DOWN	CD3D
205692_s_at	692.627	-2.25441	8.02e-07	DOWN	CD38
204192_at	606.01	-1.5093	0.0281558	DOWN	CD37
206488_s_at	436.977	-1.22281	0.000116941	DOWN	CD36
209555_s_at	488.758	-1.31164	0.0226399	DOWN	CD36
206120_at	91.0281	-1.98615	0.00057237	DOWN	CD33
1553043_a_at	494.549	-1.68012	0.0141955	DOWN	CD300LF
207270_x_at	134.761	-1.16646	0.00573252	DOWN	CD300C
209933_s_at	988.959	-1.7726	1.12e-05	DOWN	CD300A
217078_s_at	166.46	-2.26601	0.000617981	DOWN	CD300A
206545_at	133.988	-1.19941	0.00671538	DOWN	CD28
223834_at	295.11	-2.52632	2.43e-05	DOWN	CD274
227458_at	1522.25	-4.30489	2.66e-14	DOWN	CD274
206150_at	977.027	-1.42917	0.00437205	DOWN	CD27
210031_at	342.931	-1.2572	0.00328605	DOWN	CD247
207277_at	678.279	-1.44388	0.000702713	DOWN	CD209
205831_at	1431.94	-1.19365	0.00182927	DOWN	CD2
206749_at	42.6237	-1.54528	0.0386457	DOWN	CD1B
206398_s_at	262.101	-1.53214	0.0115283	DOWN	CD19
206206_at	338.418	-1.46951	0.00130446	DOWN	CD180
203645_s_at	1390.91	-1.49447	3.27e-05	DOWN	CD163
215049_x_at	1319.77	-1.48609	0.000152294	DOWN	CD163
216233_at	34.3155	-2.84162	1.88e-05	DOWN	CD163
201743_at	3718.56	-1.26379	0.000834846	DOWN	CD14
1554283_at	110.308	-1.04971	0.0495904	DOWN	CCRN4L
211434_s_at	1039.45	-1.04089	0.0240141	DOWN	CCRL2
206337_at	419.647	-1.49389	0.0279577	DOWN	CCR7
206991_s_at	720.522	-1.54206	6.9e-07	DOWN	CCR5
206978_at	536.728	-1.99477	2.45e-06	DOWN	CCR2
207794_at	51.7955	-2.3578	0.0038711	DOWN	CCR2
205098_at	1006.05	-2.10824	0.000126765	DOWN	CCR1
205099_s_at	698.367	-1.95826	0.00178092	DOWN	CCR1
227280_s_at	2036.36	-1.20927	0.00930932	DOWN	CCNYL1
228810_at	592.839	-1.19333	0.00595023	DOWN	CCNYL1
214038_at	1215.77	-2.29517	0.000441511	DOWN	CCL8
1555759_a_at	648.625	-1.10522	0.0313097	DOWN	CCL5
204103_at	1426.21	-2.65148	4.09e-06	DOWN	CCL4
205114_s_at	1225.62	-2.33631	0.000205814	DOWN	CCL3
216598_s_at	2514.8	-1.25079	0.0418797	DOWN	CCL2
210072_at	1436.59	-2.55391	0.0213272	DOWN	CCL19
209924_at	2686.13	-3.56194	0.000130657	DOWN	CCL18
32128_at	2448.65	-2.90427	0.000878616	DOWN	CCL18
226756_at	1258.3	-1.5954	0.000539797	DOWN	CCDC71L
227883_at	29.3825	-3.11015	0.00336563	DOWN	CCDC71L
229521_at	1256.39	-1.41981	0.00818762	DOWN	CCDC71L
1553102_a_at	337.802	-1.69705	0.0148086	DOWN	CCDC69
212886_at	379.105	-1.31097	0.0106007	DOWN	CCDC69
228994_at	119.191	2.26013	0.000521022	UP	CCDC24
1553894_at	88.9133	1.97788	0.00017739	UP	CCDC122
222890_at	145.27	1.0858	0.00140366	UP	CCDC113
1570650_at	27.177	-1.57871	0.0348656	DOWN	CCBL1
205379_at	475.871	-1.10474	0.0398217	DOWN	CBR3
238549_at	1468.97	1.09901	0.0118559	UP	CBFA2T2
1554786_at	119.116	-1.6624	0.0471421	DOWN	CASS4
210577_at	43.5516	-1.68095	0.0225886	DOWN	CASR
207500_at	2312.54	-2.40951	9.6e-05	DOWN	CASP5
205467_at	708.236	-1.38358	0.00023622	DOWN	CASP10
206011_at	2854.35	-1.72396	0.000137749	DOWN	CASP1
209970_x_at	6682.96	-1.55201	0.000110588	DOWN	CASP1
211366_x_at	6241.47	-1.61619	0.000111696	DOWN	CASP1
211367_s_at	3085.74	-1.86208	0.000109797	DOWN	CASP1
211368_s_at	5511.03	-1.7283	0.000158535	DOWN	CASP1
220247_at	28.8965	2.18096	0.0164903	UP	CASC5
1552703_s_at	3012.34	-1.81137	1.18e-05	DOWN	CARD16
1552701_a_at	3848.99	-1.55544	2.94e-07	DOWN	CARD16
221040_at	122.901	1.58944	0.038826	UP	CAPN10
1568604_a_at	282.979	1.47949	0.0041113	UP	CADPS
239884_at	67.2154	1.67618	0.0153546	UP	CADPS
240433_x_at	14.8694	-3.58954	2.34e-06	DOWN	CADM2
207050_at	35.3685	1.8184	0.0222484	UP	CACNA2D1
227623_at	227.93	-1.25614	0.00124226	DOWN	CACNA2D1
207998_s_at	108.984	1.26808	0.0454083	UP	CACNA1D
210108_at	157.888	1.32874	0.0052294	UP	CACNA1D
221003_s_at	55.7676	2.19784	0.00270623	UP	CAB39L
225914_s_at	298.506	1.17592	0.0168962	UP	CAB39L
225915_at	245.83	1.72478	0.00501054	UP	CAB39L
1552755_at	24.1722	-1.7782	0.0387948	DOWN	C9orf66
1553642_at	46.0599	1.45964	0.0446299	UP	C9orf163
218541_s_at	1743.7	-1.84669	0.0125744	DOWN	C8orf4
238635_at	231.869	1.46453	0.00437917	UP	C5orf28
239529_at	139.459	-1.51442	0.0185149	DOWN	C5orf20
220088_at	367.892	-1.33208	0.0153546	DOWN	C5AR1
227856_at	631.009	-1.13928	4.62e-05	DOWN	C4orf32
209906_at	801.904	-1.64181	0.000411593	DOWN	C3AR1
1568658_at	216.986	-1.02893	0.00984188	DOWN	C2orf74
231126_at	116.206	1.25918	0.0356227	UP	C2orf70
1552740_at	34.9744	2.54011	0.00375248	UP	C2orf15
206839_at	91.018	-1.32578	0.0143936	DOWN	C22orf31
1558334_a_at	50.9744	-2.51535	2.4e-07	DOWN	C22orf15
226109_at	843.499	-1.28462	1.58e-05	DOWN	C21orf91
1554954_at	29.1229	1.69497	0.0143372	UP	C21orf90
1553850_at	85.1737	1.91138	0.00484945	UP	C21orf88
238541_at	116.841	1.89929	0.000106583	UP	C21orf58
1559028_at	138.201	1.12087	0.0216122	UP	C21orf15
208747_s_at	6427.34	-1.27377	7.18e-05	DOWN	C1S
212067_s_at	3261.54	-1.01552	0.000834846	DOWN	C1R
225353_s_at	5555.24	-1.04714	0.0030131	DOWN	C1QC
202953_at	3905.06	-1.56599	4.81e-08	DOWN	C1QB
218232_at	3864.46	-1.60577	1.46e-08	DOWN	C1QA
236498_s_at	36.7276	1.55649	0.0215183	UP	C1orf86
237098_at	13.8943	2.33292	0.0107799	UP	C1orf21
228532_at	443.182	-1.30547	0.000715155	DOWN	C1orf162
1560554_a_at	26.9029	2.09782	0.0230323	UP	C1orf145
1559584_a_at	396.284	-1.66677	0.000335612	DOWN	C16orf54
1569064_at	34.5228	1.78079	0.0321494	UP	C15orf62
1564150_a_at	20.1167	-2.17563	0.0183668	DOWN	C12orf79
227099_s_at	2901.41	-1.1793	0.0148167	DOWN	C11orf96
1557180_at	15.2272	2.81243	0.00262801	UP	C11orf87
238805_at	361.448	1.07918	0.0191101	UP	C11orf52
228828_at	77.7119	-1.57527	0.0307695	DOWN	BZRAP1-AS1
228434_at	172.048	1.39826	0.000531877	UP	BTNL9
229985_at	115.776	2.21205	0.00541443	UP	BTNL9
204821_at	937.322	-1.15235	0.0007826	DOWN	BTN3A3
209846_s_at	1561.29	-1.15216	8.84e-05	DOWN	BTN3A2
212613_at	1049.04	-1.25728	0.000868925	DOWN	BTN3A2
209770_at	1423.68	-1.07413	0.00370731	DOWN	BTN3A1
236226_at	138.467	-1.09907	0.0327948	DOWN	BTLA
205504_at	293.086	-1.23411	0.0164489	DOWN	BTK
1552566_at	35.8226	2.52363	0.0205403	UP	BTBD16
237736_at	52.461	1.68433	0.0173473	UP	BSND
216521_s_at	443.66	1.03597	0.0213346	UP	BRCC3
214727_at	128.516	1.48078	0.0325507	UP	BRCA2
229975_at	56.8447	3.36519	0.000347541	UP	BMPR1B
242579_at	99.0841	2.87297	1.93e-05	UP	BMPR1B
211518_s_at	265.59	1.59781	0.0495409	UP	BMP4
232105_at	75.0096	2.57216	0.01451	UP	BLACAT1
210538_s_at	2680.81	-2.34931	9.31e-09	DOWN	BIRC3
230499_at	568.787	-1.63267	0.0001897	DOWN	BIRC3
219191_s_at	623.841	-1.11683	0.000320908	DOWN	BIN2
203140_at	1720.8	-1.8824	0.00112738	DOWN	BCL6
215990_s_at	187.535	-2.18034	0.00975989	DOWN	BCL6
228758_at	502.66	-2.49206	0.014736	DOWN	BCL6
204908_s_at	1950.05	-1.28686	0.00107846	DOWN	BCL3
205681_at	2523.09	-3.38897	6.9e-08	DOWN	BCL2A1
205433_at	95.022	-1.85068	0.0257366	DOWN	BCHE
230854_at	24.205	1.94127	0.0274858	UP	BCAR4
1561806_at	24.349	-2.78305	8.79e-05	DOWN	BC028670
223632_s_at	90.3636	1.83857	0.0204236	UP	BC005081
228439_at	1299.59	-1.8782	0.000275783	DOWN	BATF2
202391_at	3310.54	-1.384	0.00676887	DOWN	BASP1
203304_at	899.971	1.56119	0.000240809	UP	BAMBI
205293_x_at	35.4333	2.10461	0.0321369	UP	BAIAP2
204194_at	1199.49	-1.43735	0.000207152	DOWN	BACH1
238987_at	190.91	-1.11949	0.0447927	DOWN	B4GALT1
222695_s_at	43.1002	1.67309	0.0457906	UP	AXIN2
222696_at	1450.94	1.64187	0.00304244	UP	AXIN2
224176_s_at	184.175	1.65656	0.0314479	UP	AXIN2
212062_at	2483.82	1.14416	0.0267622	UP	ATP9A
216129_at	282.438	1.84336	3.54e-05	UP	ATP9A
220416_at	129.143	-1.05406	0.00387383	DOWN	ATP8B4
216873_s_at	237.858	-1.12833	0.00478053	DOWN	ATP8B2
1552532_a_at	28.9933	2.81262	0.000480996	UP	ATP6V1C2
201089_at	2699.05	-1.11563	0.00222192	DOWN	ATP6V1B2
1553151_at	95.2372	-1.62452	0.0260546	DOWN	ATP6V0D2
205095_s_at	180.175	1.04747	0.0374077	UP	ATP6V0A1
230453_s_at	35.0551	-1.40747	0.0204601	DOWN	ATP2A3
218874_s_at	167.315	1.21017	0.00962476	UP	ATAT1
228510_at	145.997	1.15099	0.00850528	UP	ATAT1
218857_s_at	1784.72	-1.12541	0.0450326	DOWN	ASRGL1
227014_at	494.155	-1.40668	0.00130874	DOWN	ASPHD2
227015_at	292.874	-1.01352	0.0336182	DOWN	ASPHD2
231712_at	23.2271	2.19401	0.0167613	UP	ASCL5
207607_at	29.491	4.70709	5.91e-07	UP	ASCL2
229215_at	1575.77	2.77794	1.18e-05	UP	ASCL2
205673_s_at	191.465	1.18156	0.0282783	UP	ASB9
210147_at	159.693	-2.05195	2.89e-05	DOWN	ART3
203388_at	723.784	-1.15307	0.0259579	DOWN	ARRB2
210828_s_at	53.8413	1.6684	0.00414109	UP	ARNT
242727_at	237.023	-1.62348	0.00135533	DOWN	ARL5B
1562270_at	68.7508	1.7417	0.0230678	UP	ARHGEF7
1559706_at	84.6372	1.84588	0.0165519	UP	ARHGEF28
224451_x_at	864.289	-1.18709	0.00372146	DOWN	ARHGAP9
226906_s_at	215.544	-1.41153	0.00119583	DOWN	ARHGAP9
232543_x_at	582.528	-1.04504	0.0258274	DOWN	ARHGAP9
232567_at	164.191	1.31567	0.0475394	UP	ARHGAP8
226219_at	796.265	-1.67715	2.15e-05	DOWN	ARHGAP30
204882_at	378.487	-1.53676	2.87e-06	DOWN	ARHGAP25
38149_at	490.228	-1.57955	9.93e-06	DOWN	ARHGAP25
218870_at	629.917	-1.60279	0.00026408	DOWN	ARHGAP15
228477_at	2400.46	1.12571	0.000960463	UP	ARGLU1
202211_at	2525.12	-1.01521	0.00830257	DOWN	ARFGAP3
205568_at	1302.58	-3.97526	0.000455135	DOWN	AQP9
1557236_at	214.689	-1.68067	4.25e-05	DOWN	APOL6
219716_at	1329.7	-1.347	5.62e-06	DOWN	APOL6
241869_at	140.701	-1.19389	0.0352219	DOWN	APOL6
1555600_s_at	183.335	-1.30935	0.012041	DOWN	APOL4
221087_s_at	712.736	-1.14935	0.00202485	DOWN	APOL3
221653_x_at	654.761	-1.02498	0.0233761	DOWN	APOL2
209546_s_at	1393.36	-2.19114	0.000293571	DOWN	APOL1
203381_s_at	1499.4	-1.42922	3.58e-05	DOWN	APOE
203382_s_at	1201.58	-1.56374	9.78e-06	DOWN	APOE
201525_at	382.134	1.06787	0.0190686	UP	APOD
204205_at	738.923	-1.58134	0.000222287	DOWN	APOBEC3G
210873_x_at	355.701	-2.429	0.0145428	DOWN	APOBEC3A
230925_at	979.512	-1.36116	6.2e-05	DOWN	APBB1IP
211712_s_at	87.3756	1.90789	0.00508894	UP	ANXA9
201012_at	5639.35	-1.47809	0.00864959	DOWN	ANXA1
226641_at	568.326	-1.69254	1.52e-05	DOWN	ANKRD44
228471_at	182.697	-1.59179	0.0311303	DOWN	ANKRD44
1556183_at	351.368	-1.3498	0.0100499	DOWN	ANKRD36BP2
1569040_s_at	444.141	-1.89749	0.00730428	DOWN	ANKRD36BP2
238439_at	2956.63	-1.47384	0.0152531	DOWN	ANKRD22
239196_at	1214.18	-1.23629	0.0371914	DOWN	ANKRD22
226663_at	812.892	1.04513	0.00666535	UP	ANKRD10-IT1
202920_at	331.737	-1.32887	0.0230374	DOWN	ANK2
213004_at	382.676	-1.0897	0.0491585	DOWN	ANGPTL2
228840_at	36.6236	-1.96751	0.00486288	DOWN	AMOTL1
228094_at	996.161	-1.32692	0.0036617	DOWN	AMICA1
215783_s_at	163.336	-1.45488	0.00179979	DOWN	ALPL
204174_at	2211.3	-1.27629	0.014645	DOWN	ALOX5AP
231202_at	115.828	-1.45391	0.0302456	DOWN	ALDH1L2
215118_s_at	1907.38	-1.62457	0.0435826	DOWN	AL928768.3
211453_s_at	19.3168	1.62399	0.0497788	UP	AKT2
226156_at	420.145	1.03339	0.0390228	UP	AKT2
1555220_a_at	20.7988	2.35835	0.0146398	UP	AKR1E2
223145_s_at	1377.34	-1.0169	0.018092	DOWN	AKIRIN2
215741_x_at	72.6433	1.47217	0.0368452	UP	AKAP8L
215336_at	273.758	1.06865	0.0207506	UP	AKAP11
215345_x_at	34.2721	-2.11944	0.00246665	DOWN	AK291611
237166_at	38.0892	1.76895	0.0333579	UP	AK056098
1560109_s_at	28.8029	-2.36303	0.0106007	DOWN	AK055458
206513_at	506.743	-2.30398	1.22e-05	DOWN	AIM2
209901_x_at	1804.18	-1.80383	1.42e-09	DOWN	AIF1
213095_x_at	1742.95	-1.76944	3.77e-10	DOWN	AIF1
215051_x_at	2224.52	-1.56927	2.06e-06	DOWN	AIF1
219841_at	13.7267	2.47619	0.0213444	UP	AICDA
229354_at	245.361	-1.15087	0.0453104	DOWN	AHRR
215672_s_at	608.909	-1.19307	0.0493498	DOWN	AHCYL2
219693_at	166.119	-1.83745	0.0354633	DOWN	AGPAT4
1554618_at	45.9175	1.44736	0.0354847	UP	AGFG2
206170_at	198.214	-1.21072	0.000602597	DOWN	ADRB2
205013_s_at	328.85	-1.32972	0.00383644	DOWN	ADORA2A
202912_at	7196.29	-2.15924	6.5e-06	DOWN	ADM
238939_at	121.258	1.17429	0.0341505	UP	ADD1
203741_s_at	517.936	-1.31217	0.00140366	DOWN	ADCY7
220434_at	41.2312	1.88648	0.0279647	UP	ADCK4
1570351_at	64.2665	1.58275	0.018604	UP	ADAMTS6
222162_s_at	618.702	-1.23878	0.0264924	DOWN	ADAMTS1
206134_at	13693.8	-1.58769	0.000872381	DOWN	ADAMDEC1
205180_s_at	272.636	-1.51584	0.00542821	DOWN	ADAM8
205997_at	697.292	-1.03756	0.00636375	DOWN	ADAM28
204639_at	452.755	-1.24181	0.0479847	DOWN	ADA
229725_at	57.1197	1.49045	0.0205403	UP	ACSL6
201963_at	2114.86	-2.29411	0.00843327	DOWN	ACSL1
207275_s_at	1256.15	-2.15913	0.0163484	DOWN	ACSL1
237030_at	141.894	-1.44684	0.0420367	DOWN	ACPP
204638_at	2127.69	-1.73506	0.000117878	DOWN	ACP5
208335_s_at	384.284	-1.38942	0.0117808	DOWN	ACKR1
205213_at	184.683	-1.70358	0.0333516	DOWN	ACAP1
238804_at	381.265	1.20379	0.00185906	UP	AC024560.2
228132_at	277.964	1.08986	0.0182454	UP	ABLIM2
223395_at	991.09	-1.85375	2.9e-05	DOWN	ABI3BP
232478_at	44.2054	2.00056	0.0289012	UP	AB074162
1553462_at	17.3811	2.20026	0.0091162	UP	---
1555129_at	48.6115	1.24466	0.0410451	UP	---
1556008_a_at	110.337	1.0249	0.0265707	UP	---
1556760_a_at	20.6113	-2.21977	0.00202708	DOWN	---
1556800_a_at	65.9758	1.78075	0.0170796	UP	---
1557270_at	634.364	1.48642	0.000504137	UP	---
1557555_at	169.949	1.10487	0.0183633	UP	---
1557676_at	29.8222	1.4795	0.0474294	UP	---
1558299_at	137.13	-2.72255	0.0153591	DOWN	---
1558445_at	136.377	1.2781	0.0215429	UP	---
1558806_at	12.4469	2.53988	0.0100215	UP	---
1559410_at	1001.77	1.71629	0.00029512	UP	---
1559724_at	41.0211	1.63211	0.000911711	UP	---
1559911_at	35.8267	1.50528	0.0378902	UP	---
1559915_at	17.1599	1.86731	0.0210843	UP	---
1561067_at	28.6197	1.82001	0.0108581	UP	---
1561778_at	28.085	-2.64016	0.000421294	DOWN	---
1561861_a_at	18.9631	3.43247	8.19e-05	UP	---
1562230_at	82.9249	1.41232	0.00384761	UP	---
1562260_at	16.7938	2.61109	0.0180307	UP	---
1562358_at	17.7747	-2.17301	0.00521045	DOWN	---
1562669_at	125.92	1.40698	0.041015	UP	---
1563299_at	21.4803	1.92514	0.0365663	UP	---
1563473_at	228.124	-1.11191	0.0298009	DOWN	---
1564626_at	15.3675	-1.59677	0.0495409	DOWN	---
1564690_at	15.8222	3.22937	0.000137113	UP	---
1566428_at	14.1735	-2.27247	0.0204207	DOWN	---
1566698_at	40.318	2.58486	0.000825666	UP	---
1566863_at	20.4323	1.94744	0.0126937	UP	---
1566887_x_at	1379.19	1.00244	0.015573	UP	---
1566978_at	17.2409	-1.76005	0.0227273	DOWN	---
1567986_at	17.3746	2.19732	0.025073	UP	---
1568616_a_at	112.421	-1.2751	0.0455207	DOWN	---
1568846_at	29.4678	2.58151	0.00682853	UP	---
1568883_at	46.3646	1.87841	0.0431389	UP	---
1569344_a_at	107.128	1.44101	0.0267582	UP	---
1569500_at	93.3735	1.95254	0.00234973	UP	---
1569523_a_at	20.59	2.35302	0.0155108	UP	---
1569942_at	13.4243	1.92627	0.0236988	UP	---
1570221_at	18.7648	1.82396	0.0348656	UP	---
204782_at	36.9696	1.67275	0.0303653	UP	---
214912_at	44.4101	2.4487	0.00184407	UP	---
215353_at	66.374	-1.5427	0.0356227	DOWN	---
215853_at	26.3317	2.47438	0.000222287	UP	---
216445_at	21.7348	2.03005	0.0345746	UP	---
216538_at	198.542	1.04324	0.0479847	UP	---
216637_at	23.7454	2.02169	0.0206387	UP	---
216708_x_at	145.152	-1.4269	0.0453104	DOWN	---
216782_at	120.871	-3.0686	0.0220586	DOWN	---
217283_at	27.0707	-1.96952	0.00774159	DOWN	---
217615_at	37.1906	1.7482	0.0306862	UP	---
221138_s_at	55.7521	1.42231	0.0268961	UP	---
222326_at	225.94	-2.05172	0.00480088	DOWN	---
222368_at	644.313	1.58141	0.00711285	UP	---
224067_at	31.8137	1.49179	0.0432601	UP	---
224487_at	24.645	1.54673	0.042779	UP	---
227826_s_at	298.68	-2.23315	0.0399518	DOWN	---
228742_at	244.144	1.12363	0.0255735	UP	---
228907_at	239.031	1.3758	3.96e-05	UP	---
229373_at	126.417	-2.50088	0.000617981	DOWN	---
229489_at	22.7684	1.44658	0.0490874	UP	---
229575_at	245.57	1.05341	0.0112953	UP	---
229728_at	170.182	1.01339	0.048728	UP	---
229937_x_at	666.106	-2.43895	9.19e-07	DOWN	---
229951_x_at	61.3155	-1.25674	0.0280063	DOWN	---
229968_at	401.637	-1.56891	0.000118088	DOWN	---
229987_at	173.408	1.14933	0.0237163	UP	---
230406_at	654.679	-1.75062	0.0248746	DOWN	---
230461_s_at	567.683	1.45051	0.0340498	UP	---
[truncated: 180 more rows]
