# Supplementary material for: Profiling the lncRNA-miRNA-mRNA ceRNA network to reveal potential crosstalk between inflammatory bowel disease and colorectal cancer
Source: PeerJ. 2019 Aug 26;7:e7451. doi: 10.7717/peerj.7451 (PMC6714963; doi:10.7717/peerj.7451)
Supplement: Table S2 [file peerj-07-7451-s002.xlsx]

## Sheet: Supplymentary Table 2 DEG_GSE10
Probe.Set.ID	Mean	logFC	Pvalue	change	Gene.Symbol
1552309_a_at	239.261	1.24376	0.0440336	UP	NEXN
1552398_a_at	152.857	2.73003	0.000375883	UP	CLEC12A
1552531_a_at	43.0969	2.66284	0.00804263	UP	NLRP11
1552535_at	31.1955	-2.39296	0.0301457	DOWN	CLDN19
1552542_s_at	80.3405	2.56021	0.00069244	UP	TAGAP
1552584_at	310.738	1.80795	0.00054186	UP	IL12RB1
1552648_a_at	302.904	1.46942	0.000357504	UP	TNFRSF10A
1552701_a_at	3848.99	1.31869	0.00371463	UP	CARD16
1552703_s_at	3012.34	1.69494	0.00606589	UP	CARD16
1552769_at	82.6222	-1.60863	0.0448387	DOWN	ZNF625
1552772_at	229.589	3.46785	0.0182369	UP	CLEC4D
1552857_a_at	23.1812	-3.07476	0.0199192	DOWN	HTR6
1553041_at	22.3486	-2.2318	0.0348505	DOWN	HTR3C
1553044_at	52.1859	2.29622	0.0320071	UP	GJA10
1553055_a_at	42.6162	3.01938	0.0154018	UP	SLFN5
1553079_at	395.006	2.82078	0.0420178	UP	TRIM40
1553213_a_at	12.9208	-2.71405	0.0342194	DOWN	KRT78
1553297_a_at	896.423	2.55947	0.000926552	UP	CSF3R
1553388_at	18.8197	-2.78106	0.017777	DOWN	FAM26D
1553420_at	153.878	-2.30525	0.0324948	DOWN	SATB2-AS1
1553423_a_at	43.8759	3.49484	0.0100099	UP	SLFN13
1553544_at	16.273	-2.60127	0.00593868	DOWN	GPR101
1553589_a_at	6513.34	2.38949	0.00184068	UP	PDZK1IP1
1553658_at	47.5733	-1.8468	0.0376111	DOWN	LINC00896
1553681_a_at	344.974	1.07239	0.0486251	UP	PRF1
1553723_at	94.1174	3.7772	1.57e-05	UP	GPR97
1553871_at	107.864	-1.8259	0.0130554	DOWN	CSNK1G2-AS1
1553893_at	58.1891	-2.54399	0.0187341	DOWN	CCDC105
1553991_s_at	336.391	-1.14747	0.00219428	DOWN	LOC101928274
1554008_at	65.7126	3.06014	0.00449108	UP	OSMR
1554110_at	91.6493	2.30191	0.000358095	UP	CDCP1
1554160_a_at	114.388	3.11474	4.8e-07	UP	ZNF446
1554268_at	81.876	-1.24336	0.0436627	DOWN	MORN1
1554283_at	110.308	2.02652	0.00144161	UP	CCRN4L
1554337_at	31.2257	-2.39513	0.0279827	DOWN	FARP2
1554396_at	112.344	2.18133	0.000629206	UP	UEVLD
1554406_a_at	183.249	1.40745	0.0256903	UP	CLEC7A
1554624_a_at	113.1	2.49823	0.030107	UP	SIRPB1
1554809_at	175.682	-1.60515	0.0114625	DOWN	LOC389199
1554976_a_at	9.90253	-3.05185	0.0455004	DOWN	LINC00051
1554997_a_at	188.679	2.59828	0.000613866	UP	PTGS2
1555058_a_at	1053.04	1.40859	0.000495514	UP	LPGAT1
1555088_x_at	77.524	2.33138	0.0204914	UP	STAT5B
1555129_at	48.6115	-2.2159	0.00171807	DOWN	---
1555148_a_at	14.3087	-2.47652	0.00785398	DOWN	M1AP
1555167_s_at	1695.78	2.54249	0.00456646	UP	NAMPT
1555175_a_at	683.799	-1.49695	0.0489794	DOWN	PBLD
1555214_a_at	37.5101	3.36447	0.000359133	UP	CLEC7A
1555247_a_at	89.2562	2.01497	0.030107	UP	RAPGEF6
1555349_a_at	923.563	1.7456	0.00818499	UP	ITGB2
1555355_a_at	255.266	1.12821	0.0470713	UP	ETS1
1555471_a_at	71.5823	-2.57426	0.0321424	DOWN	FMN2
1555564_a_at	550.366	3.32677	0.00750685	UP	CFI
1555579_s_at	522.244	1.32504	0.011181	UP	PTPRM
1555600_s_at	183.335	1.51526	0.0423469	UP	APOL4
1555613_a_at	139.853	1.86104	0.012975	UP	ZAP70
1555638_a_at	899.109	1.75735	0.0177066	UP	SAMSN1
1555643_s_at	100.407	2.70592	0.0203449	UP	LILRA5
1555705_a_at	358.433	1.20813	0.0348149	UP	CMTM3
1555756_a_at	296.193	2.30567	0.00023214	UP	CLEC7A
1555762_s_at	510.034	1.39854	0.0038785	UP	RBM15
1555785_a_at	202.779	1.79759	0.0388537	UP	XRN1
1555790_a_at	2392.55	-1.22854	0.0357974	DOWN	TMEM192
1555847_a_at	503.24	1.17155	0.0292876	UP	LOC284454
1555896_a_at	433.981	1.70761	0.007755	UP	ADAM15
1555950_a_at	7247.78	2.57535	0.00010528	UP	CD55
1555997_s_at	83.4972	2.09021	0.027546	UP	IGFBP5
1556078_at	360.943	-1.65665	0.0119128	DOWN	---
1556107_at	84.4589	2.74266	0.038085	UP	---
1556190_s_at	58.8293	3.00409	0.00373052	UP	LOC100507516
1556332_at	187.442	1.86014	0.0147941	UP	---
1556374_s_at	22.572	-1.99634	0.0260146	DOWN	BC039357
1556608_a_at	36.7364	3.46483	0.0241436	UP	EHD4
1556898_at	33.983	-2.15187	0.00243863	DOWN	LOC200830
1556903_at	56.1027	-1.51757	0.0324948	DOWN	LOC101928335
1557078_at	72.8817	2.46418	0.0172356	UP	SLFN5
1557135_at	75.5052	1.55539	0.0257812	UP	AC002310.12
1557180_at	15.2272	-2.83498	0.0336227	DOWN	C11orf87
1557206_at	15.4557	-3.03379	0.00749956	DOWN	C17orf104
1557474_at	64.2987	-2.62339	0.0036122	DOWN	LOC284578
1557479_at	24.9605	-2.69717	0.0108649	DOWN	---
1557602_at	14.7872	-3.0872	0.00103051	DOWN	LINC00870
1557689_at	177.374	1.56395	0.0324948	UP	---
1557871_at	19.0529	-2.7688	0.0436714	DOWN	LOC253573
1557938_s_at	503.011	1.51773	0.0131289	UP	PTRF
1557994_at	32.949	-2.81741	0.0126846	DOWN	TTN
1558075_at	61.1237	-1.71865	0.030107	DOWN	---
1558168_at	17.4686	-2.98213	0.00574052	DOWN	H1FX-AS1
1558212_at	80.6637	-2.188	0.016852	DOWN	LOC101930048
1558334_a_at	50.9744	2.54923	0.000254347	UP	C22orf15
1558343_at	34.9867	-2.47808	0.00989073	DOWN	---
1558397_at	283.287	3.67419	1.37e-06	UP	PECAM1
1558401_at	71.7495	1.2551	0.0469287	UP	ARIH1
1558549_s_at	348.259	3.65207	0.0493813	UP	VNN1
1558611_at	22.274	-3.03033	0.00821719	DOWN	CRHR1-IT1
1558643_s_at	86.1349	-1.34143	0.049025	DOWN	EDIL3
1558689_a_at	27.8828	-2.7982	0.0421977	DOWN	LOC441461
1558732_at	143.787	1.79936	0.0317772	UP	MAP4K4
1558821_s_at	68.5301	1.97315	0.0497237	UP	AC083843.1
1558836_at	273.829	3.3244	0.0011033	UP	---
1558837_a_at	467.416	1.89566	0.00477882	UP	---
1559028_at	138.201	-1.35379	0.0465029	DOWN	C21orf15
1559031_at	31.9161	2.18637	0.0365409	UP	EXOSC10
1559037_a_at	30.5595	2.85198	0.0380927	UP	---
1559302_at	67.0076	1.82853	0.0218445	UP	KIAA1467
1559309_at	40.8794	2.26914	0.00751157	UP	MCFD2
1559352_a_at	89.9842	2.18178	0.00659595	UP	MAFG-AS1
1559391_s_at	432.321	3.59955	0.000100038	UP	---
1559452_a_at	71.3806	2.45506	0.00484516	UP	---
1559459_at	24.705	-2.86275	0.019207	DOWN	LOC613266
1559724_at	41.0211	-1.8961	0.00477882	DOWN	---
1559876_at	78.1627	1.90626	0.0118632	UP	---
1559890_a_at	14.5733	-2.6833	0.0331222	DOWN	ABI1
1560178_at	28.1813	-2.31359	0.0455281	DOWN	---
1560396_at	249.973	1.7872	0.044636	UP	KLHL6
1560469_at	169.177	-2.01355	0.0441796	DOWN	NR5A2
1560522_at	16.0263	-3.14667	0.020529	DOWN	DLGAP1-AS3
1560552_a_at	25.2533	3.63074	0.00477882	UP	---
1560724_at	38.4492	2.26188	0.04446	UP	TOR1AIP1
1560742_at	53.8654	-1.78367	0.0138189	DOWN	---
1560905_at	36.3542	-2.19995	0.0354814	DOWN	---
1560916_a_at	287.988	1.39141	0.00232756	UP	DPY19L1
1561033_at	16.1059	-3.74612	0.00649513	DOWN	LOC101927211
1561436_at	62.6619	-2.17929	0.0203449	DOWN	LOC101927877
1561481_at	57.9566	-1.85729	0.0457404	DOWN	LOC101928435
1561534_at	16.4287	-2.8387	0.02241	DOWN	---
1561829_at	28.8298	1.94968	0.032795	UP	---
1562576_at	30.5434	2.05199	0.0348149	UP	---
1562582_at	12.0562	3.07229	0.049392	UP	AK054988
1563068_at	28.049	-2.202	0.0439385	DOWN	---
1563217_at	35.1239	2.54763	0.000950063	UP	---
1563379_at	22.806	-2.34479	0.0224529	DOWN	---
1563455_at	96.946	1.95083	0.0120743	UP	SIK3
1563502_at	62.6823	2.4237	0.00773245	UP	ZDHHC2
1563511_at	47.6529	1.88049	0.0405162	UP	DKFZp451B082
1563524_a_at	39.4671	-2.6352	0.00526908	DOWN	ITPK1-AS1
1563643_at	13.9577	-3.08729	0.0493813	DOWN	---
1564309_at	9.7047	-3.25514	0.0433741	DOWN	LINC00486
1564338_at	29.5106	2.39616	0.0387186	UP	LOC101927257
1564413_at	48.8514	-1.73445	0.0250745	DOWN	LINC01356
1564595_at	23.3448	-2.59402	0.0427291	DOWN	LINC01103
1564690_at	15.8222	-2.7873	0.026545	DOWN	---
1564787_at	55.7491	-2.31729	0.017777	DOWN	ELMOD1
1565776_at	43.4342	2.3449	0.0193339	UP	---
1565832_at	89.7315	2.37899	3.29e-05	UP	---
1566047_at	34.5049	-2.2699	0.0427541	DOWN	---
1566124_a_at	33.7291	-2.35403	0.0453457	DOWN	FABP6
1566183_at	45.4392	2.39447	0.00742027	UP	---
1566207_at	138.919	1.40394	0.0139708	UP	TCEA1
1566702_at	20.962	-2.18524	0.0387186	DOWN	---
1566863_at	20.4323	-2.31173	0.0286316	DOWN	---
1567107_s_at	656.99	1.28403	0.0219389	UP	TPM4
1567389_at	18.9465	-3.23566	0.0139158	DOWN	---
1568592_at	1624.17	1.41641	0.0207105	UP	TRIM69
1568675_at	23.3243	-2.30666	0.0106309	DOWN	CHRNA10
1568751_at	9.84213	3.38701	0.0352087	UP	RGS13
1568801_at	32.0423	-2.04215	0.0329867	DOWN	VWA9
1568949_at	100.22	2.41613	0.000337657	UP	PITPNC1
1569080_at	40.7431	-2.06635	0.0128049	DOWN	RNF165
1569219_at	46.4224	-2.34944	0.0337375	DOWN	---
1569450_at	16.9928	2.90942	0.0325081	UP	CAPZA2
1569538_at	99.5059	3.40444	3.71e-08	UP	---
1569688_at	185.035	-2.09139	0.0248694	DOWN	FMO5
1569806_at	66.1415	-1.61704	0.045096	DOWN	---
1569841_x_at	31.1896	2.15351	0.0414113	UP	LOC101927798
1570107_at	93.1852	-1.49508	0.0127282	DOWN	---
1570165_at	139.307	1.9333	0.0288624	UP	---
1570250_at	20.0356	-2.88011	0.0329867	DOWN	LPPR1
1570279_at	25.2473	-2.83984	0.00573584	DOWN	ABCA1
1570331_at	45.3138	2.76085	0.00674156	UP	---
1570336_at	54.6857	-2.34061	0.00292424	DOWN	BDH1
200599_s_at	17928.4	1.1334	0.000179193	UP	HSP90B1
200600_at	3406.79	1.48072	0.00702654	UP	MSN
200603_at	6300.67	1.0134	0.00555584	UP	PRKAR1A
200628_s_at	2610.04	2.3006	0.0012336	UP	WARS
200629_at	4894.29	2.54412	1.19e-05	UP	WARS
200665_s_at	6359.18	1.94941	0.000397303	UP	SPARC
200697_at	2867.56	1.03314	0.0454903	UP	HK1
200706_s_at	3916.53	1.41654	0.0487093	UP	LITAF
200743_s_at	4307.9	1.008	0.0326331	UP	TPP1
200755_s_at	1062.49	1.58876	0.000189667	UP	CALU
200771_at	2960.4	1.41484	0.000959567	UP	LAMC1
200788_s_at	4165.57	1.31272	0.00612485	UP	PEA15
200797_s_at	11675.1	1.30607	0.00240499	UP	MCL1
200798_x_at	4585.97	1.82166	0.00828431	UP	MCL1
200821_at	1340.84	1.26574	0.0466378	UP	LAMP2
200859_x_at	1955.78	1.43041	0.0260466	UP	FLNA
200887_s_at	7677.46	1.77993	5.2e-06	UP	STAT1
200919_at	3083.36	1.13357	0.0185344	UP	PHC2
200986_at	1741.13	1.70807	0.0115638	UP	SERPING1
200989_at	10026.8	1.43029	0.000651452	UP	HIF1A
201012_at	5639.35	1.82735	0.0187733	UP	ANXA1
201041_s_at	5081.15	1.54603	0.0265865	UP	DUSP1
201042_at	1644	2.24199	0.000556588	UP	TGM2
201060_x_at	3378	2.96037	3.49e-07	UP	STOM
201061_s_at	5925.65	2.16348	2.9e-06	UP	STOM
201063_at	3353.71	1.28286	0.00212781	UP	RCN1
201069_at	4184.46	1.31195	0.00563767	UP	MMP2
201089_at	2699.05	1.3315	0.00913225	UP	ATP6V1B2
201163_s_at	10397.4	1.31605	0.0209854	UP	IGFBP7
201169_s_at	286.709	2.38618	0.0134915	UP	BHLHE40
201170_s_at	2805.08	1.58804	0.0305013	UP	BHLHE40
201185_at	1234.06	1.33298	0.0293227	UP	HTRA1
201192_s_at	1260	1.17642	0.0106318	UP	PITPNA
201195_s_at	793.955	2.11964	0.00869725	UP	SLC7A5
201215_at	2837.73	1.23822	0.0213184	UP	PLS3
201289_at	1152	3.27172	0.000109563	UP	CYR61
201315_x_at	14456.6	1.95306	0.00069244	UP	IFITM2
201330_at	2896.9	1.31852	0.0346218	UP	RARS
201389_at	826.036	2.30744	0.00292424	UP	ITGA5
201422_at	9226.8	1.64632	0.00243695	UP	IFI30
201430_s_at	146.739	1.98011	0.0436627	UP	DPYSL3
201438_at	6850.91	2.60582	7.73e-06	UP	COL6A3
201473_at	2242.26	1.19639	0.038085	UP	JUNB
201525_at	382.134	-1.27184	0.0472182	DOWN	APOD
201564_s_at	209.463	2.69657	0.00211786	UP	FSCN1
201578_at	986.987	1.13283	0.0179833	UP	PODXL
201631_s_at	7217.21	1.94507	0.000950063	UP	IER3
201645_at	1631.94	3.52663	0.00580157	UP	TNC
201649_at	3341.75	1.88307	4.83e-05	UP	UBE2L6
201666_at	14223.6	2.76457	4.81e-07	UP	TIMP1
201667_at	3317.71	1.46553	0.0030544	UP	GJA1
201693_s_at	477.44	1.55549	0.0120421	UP	EGR1
201694_s_at	1942.6	2.63062	7.44e-06	UP	EGR1
201744_s_at	8678.25	1.42954	0.0108649	UP	LUM
201761_at	2702.21	1.57722	0.00573074	UP	MTHFD2
201792_at	823.231	1.93505	0.00237994	UP	AEBP1
201809_s_at	647.204	2.26449	0.000572309	UP	ENG
201811_x_at	1418.66	1.30287	0.0483219	UP	SH3BP5
201818_at	1206.86	2.56514	2.75e-07	UP	LPCAT1
201853_s_at	1950.27	2.08853	0.000950063	UP	CDC25B
201858_s_at	5324.3	2.25911	0.00112521	UP	SRGN
201859_at	10057.7	1.79977	0.000186696	UP	SRGN
201925_s_at	4564.25	3.55771	3.38e-07	UP	CD55
201926_s_at	6299.78	2.86841	6.1e-05	UP	CD55
201939_at	793.454	1.20588	0.00796819	UP	PLK2
201959_s_at	1367.14	1.32129	0.00423888	UP	MYCBP2
201963_at	2114.86	2.81947	0.0194126	UP	ACSL1
202007_at	1460.29	1.49184	0.00191534	UP	NID1
202018_s_at	202.078	4.82739	0.00477882	UP	LTF
202067_s_at	321.826	2.18803	0.0134586	UP	LDLR
202081_at	5176.9	1.52593	0.000325716	UP	IER2
202083_s_at	470.509	1.63251	0.00582735	UP	SEC14L1
202088_at	1980.4	1.35632	0.000479469	UP	SLC39A6
202089_s_at	587.616	1.20103	0.0487093	UP	SLC39A6
202112_at	1198.43	2.28469	0.000161019	UP	VWF
202122_s_at	2089.39	1.32531	0.0159022	UP	PLIN3
202124_s_at	2229.23	-1.2021	0.0329068	DOWN	TRAK2
202132_at	212.196	1.37465	0.00979756	UP	WWTR1
202157_s_at	2918.16	1.05519	0.0291731	UP	CELF2
202196_s_at	484.855	1.24086	0.0432071	UP	DKK3
202202_s_at	1125.67	1.3096	0.00636535	UP	LAMA4
202207_at	1024.17	1.71023	0.0204914	UP	ARL4C
202208_s_at	306.332	1.95377	0.0161437	UP	ARL4C
202211_at	2525.12	1.44074	0.00419849	UP	ARFGAP3
202237_at	3350.77	3.23331	5.97e-07	UP	LOC101928916
202238_s_at	1662.02	3.20693	3.49e-06	UP	LOC101928916
202241_at	6654.05	1.32964	0.0195341	UP	TRIB1
202269_x_at	4706.6	2.69087	2.7e-05	UP	GBP1
202270_at	3449.7	3.67652	3.38e-07	UP	GBP1
202286_s_at	363.985	1.99346	0.017934	UP	TACSTD2
202307_s_at	4262.38	2.1441	0.000133565	UP	TAP1
202310_s_at	7397.61	2.10996	0.00331536	UP	COL1A1
202311_s_at	719.292	2.3081	0.00282467	UP	COL1A1
202351_at	4589.39	1.21912	0.000512327	UP	ITGAV
202357_s_at	2635.49	3.38815	2.64e-13	UP	CFB
202369_s_at	1714.69	1.18238	0.00758584	UP	TRAM2
202376_at	881.881	3.78487	0.0139158	UP	SERPINA3
202381_at	4789.39	1.08911	0.0187733	UP	ADAM9
202388_at	3713.91	1.26946	0.0178575	UP	RGS2
202391_at	3310.54	1.75114	0.0124974	UP	BASP1
202403_s_at	13655.7	1.44444	0.0123279	UP	COL1A2
202404_s_at	7627.83	2.45576	8.53e-05	UP	COL1A2
202422_s_at	391.517	1.65343	0.0179767	UP	ACSL4
202450_s_at	3478.08	1.81234	0.0071766	UP	CTSK
202464_s_at	1718.73	3.0049	2.9e-06	UP	PFKFB3
202465_at	909.292	2.55054	0.000486212	UP	PCOLCE
202478_at	1076.24	2.69176	0.00145615	UP	TRIB2
202497_x_at	689.308	2.98977	0.000141212	UP	SLC2A3
202498_s_at	233.052	2.37573	0.00503574	UP	SLC2A3
202499_s_at	1043.74	3.90758	5.97e-07	UP	SLC2A3
202510_s_at	1517.93	2.79085	0.00192856	UP	TNFAIP2
202531_at	3287.24	2.05722	0.000151222	UP	IRF1
202557_at	1106.01	1.13578	0.00245246	UP	HSPA13
202558_s_at	779.127	1.09779	0.0436627	UP	HSPA13
202613_at	522.22	1.54935	0.0165239	UP	CTPS1
202625_at	1952.23	1.61007	0.00121656	UP	LYN
202626_s_at	2199.25	1.7689	0.00391066	UP	LYN
202627_s_at	228.262	2.4549	0.00513492	UP	SERPINE1
202628_s_at	264.738	3.56918	0.031844	UP	SERPINE1
202637_s_at	1312.86	3.02157	9.85e-05	UP	ICAM1
202638_s_at	1167.26	3.26093	1.86e-05	UP	ICAM1
202643_s_at	1225.48	1.59162	0.0170258	UP	TNFAIP3
202644_s_at	3228.29	1.6815	0.00191534	UP	TNFAIP3
202651_at	1807.5	1.65569	0.000169261	UP	LPGAT1
202659_at	4043.81	1.20063	0.0190618	UP	PSMB10
202664_at	1234.68	1.21942	0.0250876	UP	WIPF1
202679_at	937.538	1.00618	0.0148899	UP	NPC1
202743_at	853.945	1.11505	0.0483219	UP	PIK3R3
202748_at	2167.31	2.30347	1.8e-06	UP	GBP2
202766_s_at	1359.83	2.13143	0.000689351	UP	FBN1
202803_s_at	1689.35	1.75422	0.00251644	UP	ITGB2
202804_at	1335.72	1.44541	0.0136421	UP	ABCC1
202834_at	1268.8	2.40296	0.000714955	UP	AGT
202837_at	317.17	1.41953	0.0396973	UP	TRAFD1
202842_s_at	3446.35	1.21317	0.00126022	UP	DNAJB9
202843_at	538.725	1.46777	0.000130147	UP	DNAJB9
202859_x_at	7602.84	6.90532	3.85e-14	UP	CXCL8
202877_s_at	448.543	1.41781	0.0121122	UP	CD93
202878_s_at	1637.98	1.67694	0.00316535	UP	CD93
202887_s_at	2860.98	1.71736	0.0079867	UP	DDIT4
202906_s_at	1282.21	1.81553	0.0076341	UP	NBN
202912_at	7196.29	2.87836	5.15e-06	UP	ADM
202917_s_at	10824.9	5.95867	7.44e-09	UP	S100A8
202928_s_at	93.3057	2.53484	0.0011945	UP	PHF1
202948_at	2354.2	1.21157	0.0360739	UP	IL1R1
202957_at	2568.44	1.40601	0.0323333	UP	HCLS1
202963_at	1176.17	1.03834	0.0368955	UP	RFX5
202988_s_at	301.741	1.8151	0.012703	UP	RGS1
202998_s_at	1817.92	2.23723	0.000449268	UP	LOXL2
203010_at	554.334	1.20906	0.0276729	UP	STAT5A
203044_at	1747.78	1.86148	0.000382193	UP	CHSY1
203063_at	406.678	1.35499	0.00935614	UP	PPM1F
203065_s_at	702.416	1.78425	0.0318025	UP	CAV1
203066_at	1119.59	1.70752	0.0111005	UP	CHST15
203140_at	1720.8	3.08956	1.92e-05	UP	BCL6
203174_s_at	519.145	-1.08786	0.00280479	DOWN	ARFRP1
203203_s_at	622.256	1.21504	0.0360739	UP	KRR1
203256_at	554.553	6.23482	1.52e-06	UP	CDH3
203324_s_at	699.738	1.78129	0.0109169	UP	CAV2
203424_s_at	136.68	2.86797	0.000108096	UP	IGFBP5
203439_s_at	78.7669	2.7284	0.00740906	UP	STC2
203454_s_at	2011.06	1.10176	0.00316535	UP	ATOX1
203470_s_at	2718.86	3.89985	0.00578977	UP	PLEK
203471_s_at	3329.52	4.06325	0.000254347	UP	PLEK
203477_at	2340.05	1.93214	0.0265304	UP	COL15A1
203499_at	864.504	2.28684	0.0101938	UP	EPHA2
203508_at	1099.8	1.47777	0.0173573	UP	TNFRSF1B
203510_at	3235.59	1.34051	0.00851185	UP	MET
203518_at	582.326	1.12889	0.0381442	UP	LYST
203528_at	815.554	1.26395	0.0262795	UP	SEMA4D
203535_at	3988.01	4.83075	2.34e-09	UP	S100A9
203548_s_at	180.253	2.45572	0.00987661	UP	LPL
203549_s_at	256.017	1.58132	0.0496224	UP	LPL
203561_at	1378.71	2.39603	0.0120421	UP	FCGR2A
203591_s_at	468.027	4.78101	2.19e-05	UP	CSF3R
203595_s_at	864.751	1.31782	0.0181368	UP	IFIT5
203651_at	709.304	1.14692	0.045096	UP	ZFYVE16
203691_at	11084.4	4.32762	0.000203021	UP	PI3
203708_at	1630.91	3.17446	2.03e-05	UP	PDE4B
203710_at	409.288	1.6221	0.000697962	UP	ITPR1
203748_x_at	916.301	1.87474	0.0125758	UP	RBMS1
203760_s_at	844.008	1.61642	0.012525	UP	SLA
203761_at	1237.83	1.80027	0.000239289	UP	SLA
203767_s_at	953.579	1.54293	0.0174086	UP	STS
203771_s_at	219.001	1.73984	0.0122886	UP	BLVRA
203817_at	480.003	1.76229	0.0348475	UP	GUCY1B3
203821_at	1115.11	2.73099	0.00221578	UP	HBEGF
203835_at	463.368	1.41799	0.00501377	UP	LRRC32
203854_at	1289.03	2.84435	0.000110889	UP	CFI
203865_s_at	171.376	1.49346	0.0255251	UP	ADARB1
203879_at	567.357	1.89147	0.0037467	UP	PIK3CD
203887_s_at	506.486	2.44583	5.76e-05	UP	THBD
203888_at	275.927	2.0928	0.00145615	UP	THBD
203910_at	501.576	1.31245	0.0481055	UP	ARHGAP29
203915_at	2664.35	4.4623	3.87e-05	UP	CXCL9
203921_at	604.483	1.95016	0.000791854	UP	CHST2
203925_at	970.912	1.19232	0.0488657	UP	GCLM
203932_at	4085.58	1.15054	0.0204273	UP	HLA-DMB
203936_s_at	2809.57	2.64252	0.000154931	UP	MMP9
203957_at	405.118	1.11237	0.0460076	UP	E2F6
203971_at	1209.79	1.08669	0.00507815	UP	SLC31A1
203973_s_at	4374.24	1.36986	0.0125874	UP	CEBPD
203989_x_at	679.951	2.40644	0.000141471	UP	F2R
204006_s_at	710.393	3.12866	0.00120841	UP	FCGR3A
204007_at	3064.62	5.65212	3.38e-07	UP	FCGR3B
204014_at	166.56	2.13169	0.034906	UP	DUSP4
204015_s_at	214.453	1.68985	0.0393269	UP	DUSP4
204070_at	4916.17	1.5939	0.0327944	UP	RARRES3
204083_s_at	1832.22	2.12171	0.00818499	UP	TPM2
204103_at	1426.21	2.67591	0.00119417	UP	CCL4
204163_at	578.816	1.10044	0.0293227	UP	EMILIN1
204164_at	288.49	1.33781	0.0499358	UP	SIPA1
204166_at	693.072	2.65585	0.00167057	UP	SBNO2
204194_at	1199.49	1.37048	0.0191122	UP	BACH1
204197_s_at	653.76	1.43481	0.0292831	UP	RUNX3
204198_s_at	468.045	1.83294	0.0171831	UP	RUNX3
204200_s_at	100.953	1.77697	0.0162109	UP	PDGFB
204220_at	1173.14	1.2324	0.0260146	UP	GMFG
204224_s_at	2813.02	1.38226	0.0168486	UP	GCH1
204236_at	450.193	1.6023	0.0101511	UP	FLI1
204269_at	977.828	1.91549	0.00288371	UP	PIM2
204279_at	5245.46	1.79342	0.00281653	UP	PSMB9
204281_at	377.929	1.60752	0.0112562	UP	TEAD4
204316_at	212.001	-1.07126	0.0356326	DOWN	RGS10
204339_s_at	53.8757	2.41421	0.0318164	UP	RGS4
204423_at	360.969	1.07428	0.00477882	UP	MKLN1
204436_at	758.363	1.13767	0.029998	UP	PLEKHO2
204439_at	122.578	3.09294	0.0106123	UP	IFI44L
204441_s_at	396.342	1.0439	0.0422011	UP	POLA2
204457_s_at	240.957	3.8349	0.0280335	UP	GAS1
204470_at	5279.45	5.21259	6.35e-07	UP	CXCL1
204472_at	905.916	1.7551	0.0134756	UP	GEM
204475_at	5738.27	5.30191	0.000127664	UP	MMP1
204489_s_at	1323.78	1.54819	0.0347653	UP	CD44
204490_s_at	1495.7	1.75673	0.0362747	UP	CD44
204502_at	523.785	1.36517	0.0271547	UP	SAMHD1
204533_at	3545.42	4.24999	5.45e-08	UP	CXCL10
204544_at	585.276	1.23004	0.00628536	UP	HPS5
204563_at	1087.86	2.97361	0.000160097	UP	SELL
204580_at	11371.6	3.51285	2.13e-07	UP	MMP12
204597_x_at	277.163	2.94835	0.00206901	UP	STC1
204609_at	16.3135	-3.13526	0.0285145	DOWN	CCDC85B
204619_s_at	544.813	1.21823	0.0257879	UP	VCAN
204620_s_at	2842.12	1.69273	0.00101565	UP	VCAN
204621_s_at	389.423	1.43864	0.047316	UP	NR4A2
204669_s_at	202.255	3.03516	0.000618639	UP	RNF24
204677_at	405.837	1.46271	0.0250871	UP	CDH5
204698_at	3940.23	2.15358	0.00335424	UP	ISG20
204702_s_at	693.762	1.39945	0.0390528	UP	NFE2L3
204747_at	1179.86	2.91702	0.0010149	UP	IFIT3
204748_at	730.815	4.02357	3.24e-08	UP	PTGS2
204821_at	937.322	1.47879	0.00145615	UP	BTN3A3
204855_at	1733.9	2.91599	0.0205469	UP	SERPINB5
204858_s_at	791.563	2.41856	0.00192856	UP	TYMP
204863_s_at	700.646	1.0756	0.0354643	UP	IL6ST
204879_at	334.053	2.50559	0.0139614	UP	PDPN
204882_at	378.487	1.57633	0.000768643	UP	ARHGAP25
204891_s_at	715.719	1.18901	0.0346369	UP	LCK
204904_at	227.409	1.96744	0.0280894	UP	GJA4
204912_at	1113.54	1.50047	0.0228496	UP	IL10RA
204924_at	831.842	3.13371	0.000879818	UP	TLR2
204932_at	204.458	1.55349	0.0188348	UP	TNFRSF11B
204933_s_at	293.279	1.51122	0.00573584	UP	TNFRSF11B
204944_at	317.895	1.52591	0.000921315	UP	PTPRG
204951_at	807.84	2.18353	0.0228276	UP	RHOH
204958_at	234.165	1.60873	0.0245262	UP	PLK3
204959_at	1399.24	3.16975	5.88e-05	UP	MNDA
204970_s_at	223.203	1.72942	0.00945818	UP	MAFG
204971_at	700.215	1.62189	0.00647609	UP	CSTA
204976_s_at	748.023	1.4861	0.013316	UP	AMMECR1
204994_at	560.912	1.74104	0.0145568	UP	MX2
205003_at	583.705	1.78895	0.00632992	UP	DOCK4
205027_s_at	374.042	2.61598	0.000326125	UP	MAP3K8
205032_at	1153.94	1.92161	0.0343147	UP	ITGA2
205038_at	163.045	1.81005	0.0439776	UP	IKZF1
205044_at	95.5898	4.45293	7.16e-05	UP	GABRP
205067_at	4691.2	5.5291	9.78e-16	UP	IL1B
205098_at	1006.05	1.82438	0.0346783	UP	CCR1
205101_at	309.068	1.80514	0.00144449	UP	CIITA
205108_s_at	76.9185	-1.23375	0.0158404	DOWN	APOB
205114_s_at	1225.62	2.09442	0.0320827	UP	CCL3
205119_s_at	2056.83	4.46494	6e-08	UP	FPR1
205153_s_at	482.785	1.79283	0.00484516	UP	CD40
205157_s_at	70.8103	2.47191	0.0353859	UP	JUP
205159_at	2325.58	2.73592	0.000375883	UP	CSF2RB
205193_at	610.22	1.83324	2.9e-06	UP	MAFF
205207_at	435.822	3.93799	0.0177066	UP	IL6
205213_at	184.683	2.37927	0.0258086	UP	ACAP1
205220_at	4330.66	9.94443	2.49e-16	UP	HCAR3
205234_at	147.701	2.25945	0.0136672	UP	SLC16A4
205237_at	480.276	2.78548	0.000731598	UP	FCN1
205249_at	266.41	2.71581	5.2e-06	UP	EGR2
205267_at	3466.02	2.00033	0.0273326	UP	LOC101928620
205269_at	1282.72	2.59554	0.00247418	UP	LCP2
205270_s_at	1389.33	2.31624	0.00640761	UP	LCP2
205298_s_at	410.952	1.12017	0.032831	UP	BTN2A2
205303_at	115.324	2.52802	0.0193339	UP	KCNJ8
205306_x_at	246.028	1.58758	0.00849802	UP	KMO
205326_at	440.666	1.1692	0.0414997	UP	RAMP3
205349_at	459.045	2.01863	0.0131487	UP	GNA15
205352_at	264.994	1.77383	0.0288944	UP	SERPINI1
205379_at	475.871	1.77874	0.00824963	UP	CBR3
205418_at	172.359	2.52464	0.0290925	UP	FES
205467_at	708.236	1.23147	0.0358381	UP	CASP10
205476_at	6908.37	3.47633	0.00828515	UP	CCL20
205477_s_at	22.9504	-2.32334	0.00994131	DOWN	AMBP
205479_s_at	2976.39	3.42974	0.00281653	UP	PLAU
205487_s_at	14.1137	-2.02358	0.0471475	DOWN	VGLL1
205499_at	267.523	2.62122	0.000189667	UP	SRPX2
205513_at	1058.72	4.21817	0.0158626	UP	TCN1
205517_at	32.9579	-2.05303	0.0292453	DOWN	GATA4
205534_at	186.714	1.86992	0.00141415	UP	PCDH7
205568_at	1302.58	6.09053	2.93e-05	UP	AQP9
205569_at	825.035	2.5587	0.00332602	UP	LAMP3
205572_at	214.177	1.94741	0.0440981	UP	ANGPT2
205579_at	454.946	1.63788	0.00784916	UP	HRH1
205599_at	185.279	1.81582	0.00332522	UP	TRAF1
205619_s_at	232.304	2.71449	3.87e-05	UP	MEOX1
205654_at	1089.86	3.47182	0.0187357	UP	C4BPA
205656_at	443.545	1.8767	0.00331766	UP	PCDH17
205660_at	699.451	1.65683	0.0233865	UP	OASL
205665_at	90.3599	2.08804	0.025756	UP	TSPAN9
205680_at	1133.66	5.28234	0.000148523	UP	MMP10
205681_at	2523.09	4.81628	2.8e-09	UP	BCL2A1
205686_s_at	211.288	1.94334	0.0423469	UP	CD86
205692_s_at	692.627	2.12938	0.00130757	UP	CD38
205815_at	8866.11	7.12309	2.01e-05	UP	REG3A
205828_at	7802.34	7.24677	3.18e-07	UP	MMP3
205842_s_at	473.275	1.22495	0.0148899	UP	JAK2
205844_at	1329.52	3.61596	0.0225974	UP	VNN1
205863_at	880.073	5.55545	3.66e-08	UP	S100A12
205872_x_at	128.777	2.45076	0.0181368	UP	PDE4DIP
205882_x_at	4411.16	-1.06255	0.0204914	DOWN	ADD3
205886_at	14501.4	6.76925	0.00023214	UP	REG1B
205890_s_at	3952.64	4.1255	2.71e-08	UP	GABBR1
205902_at	87.7034	4.4596	7.45e-09	UP	KCNN3
205916_at	85.2649	4.80535	0.00032385	UP	S100A7
205922_at	410.914	3.87313	2.98e-05	UP	VNN2
205936_s_at	101.019	3.83018	0.000879818	UP	HK3
205943_at	986.159	4.24483	0.000235975	UP	TDO2
205990_s_at	1508.72	1.62152	0.0270903	UP	WNT5A
206001_at	192.2	-1.62831	0.0464169	DOWN	NPY
206011_at	2854.35	1.70539	0.0112844	UP	CASP1
206025_s_at	1352.84	5.07654	0.000149155	UP	TNFAIP6
206026_s_at	1019.89	4.60359	0.000275498	UP	TNFAIP6
206034_at	498.69	1.62531	0.0167934	UP	SERPINB8
206049_at	314.002	1.54413	0.0253504	UP	SELP
206092_x_at	317.8	2.24296	0.00282467	UP	RTEL1
206115_at	296.056	3.02922	5.97e-07	UP	EGR3
206118_at	437.56	1.32481	0.00350403	UP	STAT4
206172_at	371.771	2.64824	0.0103996	UP	IL13RA2
206181_at	466.636	1.79058	0.00993476	UP	SLAMF1
206211_at	176.948	3.56292	0.0453457	UP	SELE
206214_at	1752.44	1.87967	0.0153421	UP	PLA2G7
206219_s_at	389.293	1.52745	0.0466737	UP	VAV1
206222_at	98.3725	3.55839	0.000732647	UP	TNFRSF10C
206237_s_at	113.239	2.08158	0.009495	UP	NRG1
206336_at	872.325	4.62477	4.89e-05	UP	CXCL6
206343_s_at	77.0517	3.63204	0.00120841	UP	NRG1
206359_at	923.374	4.79599	0.000347	UP	SOCS3
206369_s_at	56.9245	2.46546	0.0139158	UP	PIK3CG
206375_s_at	94.0225	-2.7399	0.0405814	DOWN	HSPB3
206380_s_at	136.773	3.38265	3.87e-05	UP	CFP
206421_s_at	100.466	4.04114	0.0410468	UP	SERPINB7
206443_at	17.234	-2.4551	0.0423469	DOWN	RORB
206467_x_at	1111.54	3.68534	3.35e-06	UP	RTEL1-TNFRSF6B
206481_s_at	362.777	1.54374	0.0148099	UP	LDB2
206484_s_at	134.64	-3.08181	0.0159022	DOWN	XPNPEP2
206486_at	149.152	1.84047	0.0425413	UP	LAG3
206503_x_at	238.513	2.36111	0.00557387	UP	PML
206508_at	117.803	2.25932	0.00762775	UP	CD70
206513_at	506.743	1.90587	0.0209465	UP	AIM2
206522_at	201.153	2.7305	0.017328	UP	MGAM
206564_at	30.5294	2.12662	0.0346296	UP	OPRL1
206571_s_at	788.385	1.30183	0.0143229	UP	MAP4K4
206574_s_at	356.372	3.1112	6.76e-05	UP	PTP4A3
206584_at	1496.78	1.6374	0.00332084	UP	LY96
206618_at	203.938	2.14821	8.79e-05	UP	IL18R1
206622_at	21.8234	-1.95835	0.0489794	DOWN	TRH
206623_at	192.234	-2.45806	0.0188558	DOWN	PDE6A
206628_at	757.415	1.31072	0.0326137	UP	SLC5A1
206631_at	503.6	1.20986	0.0441796	UP	PTGER2
206662_at	9786.01	1.30051	0.0335884	UP	GLRX
206683_at	393.765	1.28941	0.0325081	UP	ZNF165
206707_x_at	237.232	2.71878	0.0012192	UP	FAM65B
206749_at	42.6237	2.5332	0.0092252	UP	CD1B
206796_at	159.455	4.45219	2.16e-06	UP	WISP1
206827_s_at	25.3126	-1.76008	0.0114909	DOWN	TRPV6
206881_s_at	103.434	4.04772	0.000426452	UP	LILRA3
206932_at	546.252	1.45086	0.0262502	UP	CH25H
206953_s_at	411.304	1.69151	0.0171192	UP	LOC101927458
206963_s_at	49.3978	-2.84584	0.0423624	DOWN	NAT8
206991_s_at	720.522	1.55351	0.000426452	UP	CCR5
207008_at	532.257	4.21849	3.71e-08	UP	CXCR2
207030_s_at	947.876	2.02549	0.00947086	UP	CSRP2
207052_at	123.199	-2.98568	0.00130342	DOWN	HAVCR1
207072_at	249.258	2.03536	0.0103996	UP	IL18RAP
207096_at	229.998	2.31622	0.00157852	UP	SAA2-SAA4
207173_x_at	2176.02	1.54445	0.0195457	UP	CDH11
207216_at	72.6947	1.91487	0.0358548	UP	TNFSF8
207238_s_at	1491.08	1.57665	0.0264033	UP	PTPRC
207264_at	139.209	3.10108	8.97e-06	UP	KDELR3
207266_x_at	851.632	1.9748	0.00582317	UP	RBMS1
207299_s_at	17.7372	-3.07722	0.0219389	DOWN	GRM1
207339_s_at	916.989	1.57673	0.00206454	UP	LTB
207351_s_at	190.698	1.17854	0.0405814	UP	SH2D2A
207356_at	1166.16	6.94868	3.02e-05	UP	DEFB4A
207385_at	17.0923	-2.716	0.0234716	DOWN	TFDP3
207442_at	102.97	2.83932	0.0153211	UP	CSF3
207462_at	28.0905	-2.60855	0.0315426	DOWN	GLRA2
207474_at	62.5875	2.76288	0.00088963	UP	SNRK
207500_at	2312.54	2.16506	0.0230054	UP	CASP5
207513_s_at	1100.04	1.217	0.00243863	UP	ZNF189
207526_s_at	95.6841	3.28286	0.00818759	UP	IL1RL1
207529_at	7265.96	6.18579	0.00103164	UP	DEFA5
207536_s_at	187.23	2.19646	0.00866989	UP	TNFRSF9
207545_s_at	536.202	1.22358	0.034224	UP	LOC101928143
207571_x_at	572.164	1.98051	0.00243863	UP	THEMIS2
207574_s_at	1210.68	1.92251	0.016898	UP	GADD45B
207590_s_at	62.3163	2.23596	0.00944327	UP	CENPI
207600_at	16.6446	-2.4009	0.0240663	DOWN	KCNC3
207610_s_at	446.207	2.9635	0.0004243	UP	EMR2
207630_s_at	598.787	1.51346	0.00375689	UP	CREM
207665_at	46.2017	-1.98973	0.0306501	DOWN	ADAM21
207674_at	51.4823	4.28635	3.28e-05	UP	FCAR
207691_x_at	628.814	1.31253	0.0487093	UP	ENTPD1
207697_x_at	537.162	2.41314	0.00439303	UP	LILRB2
207727_s_at	1022.06	-1.07615	0.0190618	DOWN	MUTYH
207740_s_at	156.97	2.15074	0.0421227	UP	NUP62
207766_at	25.5448	-2.59797	0.0469088	DOWN	CDKL1
207814_at	4709.19	6.14665	0.000999791	UP	DEFA6
207836_s_at	564.734	1.95798	1.91e-05	UP	RBPMS
207847_s_at	6890.6	1.6146	0.0336937	UP	MUC1
207850_at	2831.08	5.26117	4.91e-06	UP	CXCL3
207907_at	49.8826	3.53524	0.00785525	UP	TNFSF14
207930_at	57.4455	-2.59076	0.0318164	DOWN	LCN1
207957_s_at	295.248	1.60514	0.0245839	UP	PRKCB
207978_s_at	79.4507	2.43615	0.022612	UP	NR4A3
208012_x_at	1561.78	1.00083	0.032795	UP	SP110
208018_s_at	1615.21	1.63826	0.0233787	UP	HCK
208025_s_at	414.499	-1.17251	0.0272691	DOWN	HMGA2
208078_s_at	582.565	2.19714	0.000308486	UP	SIK1
208087_s_at	146.796	2.66601	3.24e-05	UP	ZBP1
208092_s_at	361.752	1.44821	0.0320071	UP	FAM49A
208095_s_at	2496.51	1.18164	0.0397688	UP	SRP72
208103_s_at	401.55	1.30265	0.0323795	UP	ANP32E
208131_s_at	356.652	1.71315	0.0290308	UP	PTGIS
208133_at	25.968	-2.62529	0.0145174	DOWN	---
208152_s_at	2104.97	1.93848	0.00871659	UP	DDX21
208209_s_at	1092.14	4.42968	0.000438171	UP	C4BPB
208211_s_at	43.3844	-1.81721	0.0448482	DOWN	ALK
208250_s_at	14060.8	4.36064	0.000343741	UP	DMBT1
208292_at	30.6903	2.16831	0.030743	UP	BMP10
208296_x_at	1731.02	1.2178	0.0203971	UP	TNFAIP8
208322_s_at	145.834	3.08952	0.00425257	UP	ST3GAL1
208367_x_at	65.1391	-3.3436	0.0152294	DOWN	CYP3A4
208392_x_at	287.7	1.66863	0.00465007	UP	SP110
208438_s_at	536.394	2.90014	9.85e-05	UP	FGR
208451_s_at	1144.71	1.78609	0.00243695	UP	C4A
208457_at	26.066	-2.83405	0.0387186	DOWN	GABRD
208607_s_at	469.293	3.29714	0.000625409	UP	SAA1
208636_at	5664.23	1.16599	0.00659595	UP	ACTN1
208637_x_at	1629.49	1.4377	0.0233009	UP	ACTN1
208649_s_at	3546.01	1.04219	0.0137129	UP	VCP
208658_at	2281.84	1.65263	0.000177132	UP	PDIA4
208677_s_at	5726.68	-1.48497	0.00243863	DOWN	BSG
208743_s_at	4886.04	1.25639	0.0422011	UP	YWHAB
208747_s_at	6427.34	1.46476	0.00103668	UP	C1S
208782_at	4945.35	1.57826	0.0216244	UP	FSTL1
208788_at	2531.74	2.14936	0.0144642	UP	ELOVL5
208789_at	1040.62	1.50545	0.0100904	UP	PTRF
208792_s_at	1461.11	1.83913	0.0342194	UP	CLU
208850_s_at	774.411	1.99735	0.020589	UP	THY1
208851_s_at	756.889	2.07994	0.00316535	UP	THY1
208885_at	2061.81	1.18671	0.0497588	UP	LCP1
208891_at	3655.91	1.40158	0.0455004	UP	DUSP6
208892_s_at	2025.8	1.83996	0.00310456	UP	DUSP6
208893_s_at	810.303	1.93631	0.0110964	UP	DUSP6
208942_s_at	6732.39	1.06406	0.0362747	UP	SEC62
208962_s_at	232.781	3.32806	9.19e-06	UP	FADS1
208964_s_at	541.583	1.47104	0.0321424	UP	FADS1
208965_s_at	1147.56	1.36981	0.0376111	UP	IFI16
208966_x_at	3247.45	1.44789	0.0137397	UP	IFI16
208981_at	1481.08	1.42201	0.00439075	UP	PECAM1
208982_at	2302.47	2.01014	0.00177144	UP	PECAM1
208983_s_at	691.166	1.7016	0.0155227	UP	PECAM1
208991_at	5126.36	1.54824	0.0011033	UP	STAT3
208992_s_at	3041.66	1.32725	0.0174528	UP	STAT3
209016_s_at	159.482	2.35751	0.0164468	UP	KRT7
209035_at	1414.31	1.0209	0.0016642	UP	MDK
209037_s_at	485.737	1.42893	0.0416928	UP	EHD1
209050_s_at	2150.43	1.52804	0.0165087	UP	RALGDS
209071_s_at	3961.92	2.11096	0.00185895	UP	RGS5
209081_s_at	802.942	1.80543	0.00247418	UP	COL18A1
209082_s_at	754.97	2.0842	0.000153908	UP	COL18A1
209083_at	1607.36	1.26856	0.0324948	UP	CORO1A
209086_x_at	325.984	1.52391	0.00871536	UP	MCAM
209087_x_at	896.178	2.23926	1.75e-05	UP	MCAM
209189_at	2379.19	2.55096	0.00245246	UP	FOS
209191_at	1253.87	1.45622	0.0121122	UP	TUBB6
209210_s_at	1343.49	1.37981	0.0179943	UP	FERMT2
209250_at	1956.35	1.5446	0.00500297	UP	DEGS1
209295_at	1566.57	1.01349	0.0408695	UP	TNFRSF10B
209305_s_at	411.869	1.71555	0.0386287	UP	GADD45B
209308_s_at	636.556	1.54384	0.0131036	UP	BNIP2
209321_s_at	499.392	1.25286	0.0405107	UP	ADCY3
209324_s_at	114.57	3.35427	0.0457404	UP	RGS16
209325_s_at	187.806	1.99638	0.0228983	UP	RGS16
209392_at	2135.84	1.26838	0.0318164	UP	ENPP2
209395_at	2780.11	6.06521	4.54e-09	UP	CHI3L1
209396_s_at	2491.96	5.81429	5.8e-07	UP	CHI3L1
209424_s_at	777.171	-1.31316	0.0380949	DOWN	AMACR
209451_at	1501.78	1.55078	0.000257511	UP	TANK
209473_at	1066.03	1.47578	0.00750685	UP	ENTPD1
209474_s_at	470.986	1.60832	0.0288944	UP	ENTPD1
209539_at	688.527	1.1527	0.00459334	UP	ARHGEF6
209546_s_at	1393.36	3.85313	3.35e-07	UP	APOL1
209596_at	2194.9	1.41479	0.0254336	UP	MXRA5
209606_at	1368.11	1.65922	0.0134756	UP	CYTIP
209626_s_at	439.533	1.05287	0.0397552	UP	OSBPL3
209636_at	176.12	1.68704	0.0373428	UP	NFKB2
209640_at	174.592	1.45599	0.0104256	UP	PML
209683_at	202.584	1.71949	0.0217729	UP	FAM49A
209685_s_at	493.821	1.5367	0.0113186	UP	PRKCB
209710_at	330.818	1.08862	0.0225974	UP	GATA2
209721_s_at	323.715	1.34574	0.00981661	UP	IFFO1
209728_at	120.647	2.40048	0.0324948	UP	HLA-DRB4
209732_at	2504.16	1.56586	0.00588758	UP	CLEC2B
209752_at	19544.6	6.66895	0.000226854	UP	REG1A
209763_at	304.782	2.49917	0.0337909	UP	CHRDL1
209770_at	1423.68	1.4158	0.00459334	UP	BTN3A1
209774_x_at	3557.44	4.656	1.27e-05	UP	CXCL2
209790_s_at	4186.21	-1.13247	0.0434526	DOWN	CASP6
209795_at	585.07	2.52603	0.000539184	UP	CD69
209797_at	822.101	1.02334	0.0147769	UP	CNPY2
209803_s_at	3246.89	1.92187	0.0114909	UP	PHLDA2
209807_s_at	45.6923	2.34134	0.049392	UP	NFIX
209821_at	207.012	2.03431	0.0384399	UP	IL33
209826_at	365.097	-1.09843	0.0423812	DOWN	EGFL8
209829_at	277.745	2.23115	0.0255092	UP	FAM65B
209834_at	140.813	2.64663	0.00558761	UP	CHST3
209835_x_at	2053.95	1.56017	0.032213	UP	CD44
209839_at	90.9828	2.21398	0.000592191	UP	DNM3
209846_s_at	1561.29	1.44511	0.000289065	UP	BTN3A2
209901_x_at	1804.18	1.0115	0.0438046	UP	AIF1
209921_at	749.938	2.97079	5.41e-05	UP	SLC7A11
209930_s_at	66.2102	2.97069	0.0176623	UP	NFE2
209933_s_at	988.959	1.30784	0.0490569	UP	CD300A
209939_x_at	2797.26	1.22358	0.0472748	UP	CFLAR
209949_at	1006.71	2.36956	0.0012564	UP	NCF2
209955_s_at	293.965	3.65187	0.0474956	UP	FAP
209959_at	80.7091	3.65636	0.000110929	UP	NR4A3
209967_s_at	505.664	1.91388	0.00587142	UP	CREM
209969_s_at	1112.15	3.06159	3.35e-06	UP	STAT1
209970_x_at	6682.96	1.75357	0.00186443	UP	CASP1
209999_x_at	101.367	3.54709	0.00316535	UP	SOCS1
210001_s_at	819.457	3.18077	1.39e-05	UP	SOCS1
210029_at	3741.3	5.35574	2.76e-07	UP	IDO1
210037_s_at	1184.96	3.60801	9.19e-06	UP	NOS2
210056_at	295.531	2.80103	3.87e-05	UP	RND1
210109_at	145.214	2.82381	0.000189667	UP	SND1-IT1
210116_at	133.295	1.53842	0.0339706	UP	SH2D1A
210118_s_at	279.015	4.57793	0.00053811	UP	IL1A
210119_at	349.216	5.58624	2.92e-05	UP	KCNJ15
210146_x_at	390.96	3.02515	0.000145002	UP	LILRB2
210147_at	159.693	3.7773	2.8e-09	UP	ART3
210163_at	833.903	5.42896	1.19e-05	UP	CXCL11
210164_at	1327.06	4.05844	0.0142403	UP	GZMB
210165_at	18.957	-2.90865	2.83e-05	DOWN	DNASE1
210176_at	422.722	1.93647	0.024867	UP	TLR1
210177_at	1499.56	1.47349	0.0214555	UP	TRIM15
210184_at	272.884	3.95576	1.91e-05	UP	ITGAX
210190_at	58.9317	3.83242	0.00261167	UP	STX11
210225_x_at	583.886	2.21281	0.0132136	UP	LILRB3
210260_s_at	2159.53	1.35144	0.0117517	UP	TNFAIP8
210354_at	228.808	4.44271	0.000613883	UP	IFNG
210409_at	103.151	-1.31746	0.0364864	DOWN	MLLT4-AS1
210423_s_at	268.166	2.11415	0.0450632	UP	SLC11A1
210439_at	113.148	3.78015	3.24e-05	UP	ICOS
210448_s_at	401.714	1.71655	0.0436627	UP	P2RX5
210511_s_at	346.29	5.89508	5.76e-05	UP	INHBA
210538_s_at	2680.81	2.49377	6.13e-06	UP	BIRC3
210605_s_at	456.261	2.48064	0.00368354	UP	MFGE8
210619_s_at	314.768	1.98573	0.0139158	UP	HYAL1
210663_s_at	580.269	3.08493	0.0147769	UP	KYNU
210681_s_at	1214.26	1.27113	0.0208393	UP	MIR6125
210705_s_at	410.393	1.29549	0.0317672	UP	TRIM5
210706_s_at	215.83	1.68167	0.021032	UP	RNF24
210754_s_at	2134.12	1.60226	0.00793102	UP	LYN
210764_s_at	738.357	2.90677	0.000470557	UP	CYR61
210772_at	365.193	4.17714	0.00695219	UP	FPR2
210785_s_at	628.928	2.05667	0.000702922	UP	THEMIS2
210841_s_at	133.882	1.73505	0.00945818	UP	NRP2
210845_s_at	3504.84	2.56271	4.02e-05	UP	PLAUR
210869_s_at	589.681	2.48455	6.04e-06	UP	MCAM
210957_s_at	16.4023	-2.7706	0.0387186	DOWN	AFF2
211000_s_at	479.047	1.16976	0.0145102	UP	IL6ST
211001_at	53.7499	2.00053	0.0369775	UP	TRIM29
211003_x_at	126.657	3.12558	0.00283956	UP	TGM2
211012_s_at	514.89	1.75732	0.0204273	UP	PML
211062_s_at	87.021	3.27728	0.0168945	UP	CPZ
211111_at	28.488	-2.08204	0.0346369	DOWN	HGC6.3
211122_s_at	1095.95	5.58167	4.35e-05	UP	CXCL11
211132_at	23.964	-2.24658	0.0457404	DOWN	INTS3
211138_s_at	256.595	1.75506	0.0101272	UP	KMO
211148_s_at	151.665	1.71943	0.032213	UP	ANGPT2
211160_x_at	933.47	1.82779	0.00526908	UP	ACTN1
211211_x_at	39.258	2.58608	0.0280894	UP	SH2D1A
211226_at	29.0483	2.64986	0.0214555	UP	GALR2
211256_x_at	380.273	1.10386	0.0440901	UP	BTN2A1
211269_s_at	221.704	1.51646	0.0460828	UP	IL2RA
211275_s_at	3613.71	1.05462	0.0218661	UP	GYG1
211302_s_at	579.732	2.75237	0.000714955	UP	PDE4B
211339_s_at	288.856	1.49299	0.00619667	UP	ITK
211340_s_at	1023.44	1.39341	0.00931457	UP	MCAM
211366_x_at	6241.47	1.69864	0.00501377	UP	CASP1
211367_s_at	3085.74	1.7988	0.0126846	UP	CASP1
211368_s_at	5511.03	1.94315	0.00259356	UP	CASP1
211506_s_at	1981.3	6.33722	2.76e-06	UP	CXCL8
211564_s_at	171.275	2.66174	5.41e-05	UP	PDLIM4
211571_s_at	676.02	1.44611	0.0346314	UP	VCAN
211661_x_at	363.055	2.25771	0.0172356	UP	PTAFR
211663_x_at	767.919	1.99734	0.000359774	UP	PTGDS
211668_s_at	1595.45	3.46797	0.00192856	UP	PLAU
211716_x_at	2439.81	1.22635	0.013527	UP	ARHGDIA
211748_x_at	3085.64	2.25826	0.00118426	UP	PTGDS
211766_s_at	460.543	-3.64018	0.0101938	DOWN	PNLIPRP2
211795_s_at	661.031	1.7067	0.029624	UP	FYB
211806_s_at	224.564	2.36445	0.0306501	UP	KCNJ15
211835_at	149.653	2.58838	0.039811	UP	IGKC
211924_s_at	2549.41	2.20813	0.000732647	UP	PLAUR
211958_at	309.862	2.15811	7.48e-06	UP	IGFBP5
211959_at	3786.63	3.44466	2.34e-09	UP	IGFBP5
211964_at	5865.2	1.64384	0.00210313	UP	COL4A2
211980_at	6755.18	2.28651	2.31e-05	UP	COL4A1
211981_at	1293.39	2.37039	0.00107839	UP	COL4A1
212000_at	143.104	1.83932	0.012181	UP	SUGP2
212010_s_at	7355.21	1.2704	0.00494439	UP	CDV3
212012_at	1495.03	1.41531	0.0173437	UP	PXDN
212013_at	449.175	1.91432	0.0172684	UP	PXDN
212014_x_at	1625.81	1.4764	0.0233796	UP	CD44
212048_s_at	1817.41	1.19399	0.0202789	UP	YARS
212067_s_at	3261.54	1.49678	0.000141471	UP	C1R
212077_at	6469.83	1.42966	0.0134893	UP	CALD1
212116_at	1299.76	1.03536	0.00884089	UP	TRIM27
212122_at	182.553	1.80938	0.0153421	UP	RHOQ
212171_x_at	1460.2	1.15612	0.0291731	UP	VEGFA
212187_x_at	2716.97	2.05035	0.00696344	UP	PTGDS
212201_at	464.283	1.24258	0.0411979	UP	ANKLE2
212235_at	293.088	1.98754	0.000347	UP	PLXND1
212245_at	2138.31	1.50604	0.000631415	UP	MCFD2
212249_at	423.712	-1.19129	0.00647609	DOWN	PIK3R1
212251_at	2286.78	1.80917	0.0110795	UP	MTDH
212263_at	609.945	2.12248	0.0148932	UP	QKI
212265_at	1367.62	1.3866	0.0384399	UP	QKI
212274_at	431.645	2.17074	0.00236942	UP	LPIN1
212297_at	1419.46	1.58416	0.0139158	UP	ATP13A3
212316_at	409.026	1.62338	0.0357974	UP	NUP210
212350_at	1321.94	1.11117	0.0224245	UP	TBC1D1
212394_at	237.688	-1.0103	0.0157982	DOWN	EMC1
212414_s_at	701.878	1.39653	0.0101494	UP	GLYR1
212441_at	2059.78	1.10702	0.0299389	UP	KIAA0232
212457_at	1231.78	1.18476	0.0347576	UP	TFE3
212489_at	744.71	1.54796	0.032795	UP	COL5A1
212501_at	7298.25	1.79613	0.000463424	UP	CEBPB
212531_at	24309.8	3.52865	1.8e-06	UP	LCN2
212561_at	670.176	1.62765	0.0163574	UP	DENND5A
212582_at	4156.66	1.14339	0.00948248	UP	OSBPL8
212587_s_at	2970.91	1.91986	0.00612485	UP	PTPRC
212588_at	2069.61	1.84506	0.0115638	UP	PTPRC
212608_s_at	540.036	1.37515	0.0428305	UP	NUDT3
212613_at	1049.04	1.40713	0.00935614	UP	BTN3A2
212624_s_at	414.94	2.55348	0.00399714	UP	CHN1
212641_at	422.796	1.3313	0.00341814	UP	HIVEP2
212646_at	1811.57	1.33872	0.0155227	UP	RFTN1
212657_s_at	4065.28	5.56403	3.49e-06	UP	IL1RN
212659_s_at	736.265	3.11057	0.0117844	UP	IL1RN
212707_s_at	265.833	2.04976	0.007755	UP	LOC102725198
212736_at	225.952	1.44142	0.0436627	UP	C16orf45
212750_at	304.992	1.54209	0.0468968	UP	PPP1R16B
212791_at	296.668	1.26778	0.0231856	UP	C1orf216
212792_at	701.779	1.50718	0.000902321	UP	DPY19L1
212822_at	243.402	1.99902	0.00362797	UP	HEG1
212886_at	379.105	1.48745	0.0440968	UP	CCDC69
212902_at	705.772	1.2069	0.0488152	UP	SEC24A
212917_x_at	1105.84	1.01185	0.020795	UP	RECQL
212918_at	816.702	1.17564	0.00394892	UP	RECQL
212923_s_at	535.523	1.052	0.0306501	UP	PXDC1
212942_s_at	1350.16	5.26211	0.000950063	UP	CEMIP
212950_at	469.976	1.78828	0.0174407	UP	GPR116
212951_at	415.958	1.50242	0.0438214	UP	GPR116
213001_at	1062.35	2.10272	0.000820391	UP	ANGPTL2
213004_at	382.676	2.09697	0.00118426	UP	ANGPTL2
213006_at	155.404	2.19113	0.00092593	UP	CEBPD
213038_at	1362.38	1.00857	0.0488152	UP	RNF19B
213060_s_at	360.425	2.32295	0.0377464	UP	CHI3L2
213067_at	119.333	1.63391	0.0410468	UP	MYH10
213094_at	926.076	1.77991	0.00718387	UP	GPR126
213098_at	250.496	1.31281	0.0137397	UP	RQCD1
213113_s_at	765.178	1.61116	0.0415342	UP	SLC43A3
213125_at	355.325	2.4542	4.35e-05	UP	OLFML2B
213138_at	308.304	1.63383	0.0451895	UP	ARID5A
213160_at	478.226	1.53802	0.00574848	UP	DOCK2
213173_at	114.998	1.46359	0.000594948	UP	PCNX
213194_at	963.134	1.90431	0.00421277	UP	ROBO1
213205_s_at	109.554	2.49197	0.0351079	UP	RAD54L2
213224_s_at	1755.89	-1.42709	0.024867	DOWN	BBIP1
213258_at	1084.2	1.23168	0.0384399	UP	TFPI
213293_s_at	2529.69	1.36787	0.00346209	UP	TRIM22
213338_at	909.955	3.40943	5.62e-07	UP	TMEM158
213358_at	455.839	2.2452	0.0107803	UP	MTCL1
213394_at	310.615	1.16495	0.0264033	UP	MAPKBP1
213425_at	1136.97	2.60989	0.000579098	UP	WNT5A
213428_s_at	4437.17	1.48452	0.0208393	UP	COL6A1
213479_at	640.503	3.32609	0.0127845	UP	NPTX2
213507_s_at	6445.12	1.1562	0.0346869	UP	KPNB1
213523_at	335.086	1.07299	0.0259134	UP	CCNE1
213524_s_at	2434.41	3.66119	3.35e-06	UP	G0S2
213541_s_at	179.968	1.08146	0.0158626	UP	ERG
213543_at	108.704	1.27374	0.0114716	UP	SGCD
213554_s_at	1333.12	1.00512	0.0321424	UP	CDV3
213592_at	383.112	1.56699	0.0194126	UP	APLNR
213603_s_at	4110.53	1.12467	0.0474037	UP	RAC2
213618_at	766.929	1.31362	0.0447574	UP	ARAP2
213680_at	298.014	3.95386	0.00250227	UP	KRT6B
213693_s_at	8477.41	1.58902	0.0307739	UP	MUC1
213700_s_at	223.823	1.85249	0.0101494	UP	PKM
213703_at	320.612	1.34472	0.0363746	UP	LINC00342
213746_s_at	1145.76	1.46872	0.0259134	UP	FLNA
213770_at	28.4145	-2.05901	0.0179854	DOWN	KSR1
213790_at	75.3177	4.61777	0.0131426	UP	ADAM12
213816_s_at	88.1078	1.56297	0.0365409	UP	MET
213817_at	247.102	2.15462	0.00169201	UP	IRAK3
213829_x_at	306.564	2.1579	0.000817593	UP	RTEL1
213832_at	626.396	2.66838	0.000330203	UP	KCND3
213869_x_at	720.842	1.65574	0.0149125	UP	THY1
213871_s_at	58.4275	2.03968	0.0311255	UP	DNPH1
213905_x_at	666.749	2.40506	0.00395388	UP	BGN
213924_at	291.86	1.92493	0.00143079	UP	GNAL
213933_at	97.7699	1.85869	0.0408329	UP	PTGER3
213943_at	129.349	1.72039	0.0423721	UP	TWIST1
213947_s_at	453.845	2.26155	0.00300626	UP	NUP210
214014_at	184.437	2.34552	0.0421227	UP	CDC42EP2
214022_s_at	17044.5	1.549	0.0107572	UP	IFITM1
214024_s_at	42.5892	-1.81751	0.0350881	DOWN	DGCR6L
214057_at	427.033	1.1701	0.0173573	UP	MCL1
214133_at	53.2071	2.57917	0.0235336	UP	MUC6
214195_at	86.6813	2.93863	0.0147881	UP	TPP1
214208_at	51.3259	-2.03193	0.0339706	DOWN	KLHL35
214240_at	145.571	2.23857	0.0455281	UP	GAL
214314_s_at	518.22	1.39438	0.0372552	UP	EIF5B
214370_at	158.334	6.4958	3.94e-06	UP	S100A8
214428_x_at	941.783	1.3157	0.0408714	UP	C4A
214438_at	324.267	1.63632	0.0147881	UP	HLX
214453_s_at	412.09	1.42368	0.0497588	UP	IFI44
214456_x_at	783.801	4.15149	0.00676649	UP	SAA1
214467_at	489.803	2.0747	0.00518415	UP	GPR65
214508_x_at	422.107	2.0545	0.00025894	UP	CREM
214511_x_at	568.118	2.40599	0.000238105	UP	FCGR1B
214614_at	815.506	-1.25406	0.00673236	DOWN	MNX1
214617_at	595.04	1.65691	0.00306974	UP	PRF1
214660_at	149.795	1.56628	0.0417705	UP	ITGA1
214734_at	1912.02	-1.81456	0.0174528	DOWN	EXPH5
214752_x_at	1047.21	1.31328	0.0318703	UP	FLNA
214769_at	70.9342	3.16932	0.000448381	UP	CLCN4
214861_at	120.029	1.87854	0.0470868	UP	KDM4C
214918_at	109.853	1.23753	0.0297266	UP	HNRNPM
214967_at	43.0592	2.28639	0.0220527	UP	---
214974_x_at	1164.72	7.5129	1.82e-06	UP	CXCL5
215014_at	165.769	2.85984	0.0176892	UP	KCND3
215033_at	41.2631	3.06806	0.00211425	UP	TM4SF1
215065_at	40.6279	-1.80212	0.0306324	DOWN	PHF8
215078_at	310.96	4.24316	0.00218825	UP	LOC100129518
215104_at	60.0851	2.51155	0.0179355	UP	NRIP2
215127_s_at	1572.85	2.17189	0.00150801	UP	RBMS1
215185_at	110.051	1.64013	0.0416791	UP	LINC00963
215223_s_at	4601.2	3.53705	2.9e-06	UP	LOC100129518
215280_s_at	221.36	-1.29312	0.00488272	DOWN	PPFIA3
215285_s_at	136.688	1.60584	0.0290925	UP	PHTF1
215346_at	535.137	1.21804	0.0375009	UP	CD40
215402_at	32.0202	2.65625	0.0346783	UP	APPBP2
215454_x_at	42.5908	-2.05378	0.0255251	DOWN	SFTPC
215458_s_at	144.311	1.38631	0.0224529	UP	SMURF1
215461_at	39.4609	-2.07783	0.026925	DOWN	ZNRF4
215498_s_at	1131.65	1.5725	0.0134227	UP	LOC100996792
215563_s_at	174.882	-3.58746	0.0243263	DOWN	MST1L
215646_s_at	868.422	1.61733	0.0263474	UP	VCAN
215668_s_at	43.1529	-2.15903	0.0220078	DOWN	PLXNB1
215753_at	28.3767	-2.38185	0.030107	DOWN	---
215853_at	26.3317	-2.9899	0.000631415	DOWN	---
215862_at	43.3723	-2.23755	0.0193339	DOWN	---
215925_s_at	136.955	1.78522	0.0319932	UP	CD72
215977_x_at	449.011	2.10115	0.0324948	UP	GK
215990_s_at	187.535	2.60729	0.028476	UP	BCL6
216080_s_at	226.801	1.49021	0.0264033	UP	FADS3
216129_at	282.438	-1.47391	0.0387314	DOWN	ATP9A
216236_s_at	414.248	2.5025	0.00054186	UP	SLC2A14
216243_s_at	532.975	4.42091	0.000646659	UP	IL1RN
216245_at	38.1068	2.99537	0.00643427	UP	IL1RN
216248_s_at	362.714	1.89262	0.016852	UP	NR4A2
216258_s_at	28.9661	-2.77863	0.0358512	DOWN	SERPINB13
216263_s_at	65.0076	1.57199	0.0260146	UP	NGDN
216310_at	180.345	1.81088	0.00282467	UP	TAOK1
216325_x_at	211.523	2.77827	0.0190618	UP	RTEL1
216331_at	166.419	1.95704	0.00292424	UP	ITGA7
216423_at	46.1169	1.98099	0.0469287	UP	---
216434_at	31.8646	-1.72135	0.0279949	DOWN	TTC38
216439_at	47.4258	-2.73098	0.0392103	DOWN	TNK2
216445_at	21.7348	-3.23716	0.00492086	DOWN	---
216453_at	88.5606	-1.70113	0.0421227	DOWN	ZNF287
216647_at	222.299	-1.2913	0.018112	DOWN	TCF3
216664_at	19.3468	-2.30535	0.038158	DOWN	LOC101929148
216828_at	35.7561	-2.3592	0.0174479	DOWN	LOC100505874
216834_at	1323.41	2.6722	4.29e-06	UP	RGS1
216841_s_at	2106.37	3.4591	3.49e-06	UP	LOC100129518
216860_s_at	92.3458	2.61499	8.43e-05	UP	GDF11
216913_s_at	227.686	1.94795	0.00859267	UP	RRP12
216950_s_at	551.848	2.4282	0.000160097	UP	FCGR1A
217001_x_at	90.4108	-1.66057	0.02241	DOWN	HLA-DOA
217015_at	12.6327	-3.36918	0.0134915	DOWN	RBBP4P4
217028_at	1929.92	1.78467	0.0110697	UP	CXCR4
217029_at	15.3511	-2.33934	0.0172684	DOWN	---
217099_s_at	377.216	1.01048	0.0264032	UP	GEMIN4
217118_s_at	951.364	1.32459	0.00303917	UP	KIAA0930
217157_x_at	7826.58	2.02195	0.0231856	UP	IGK
217201_at	19.5868	-2.92429	0.0061294	DOWN	RASAL2
217250_s_at	36.815	-2.46669	0.030107	DOWN	CHD5
217275_at	47.4947	-1.89786	0.0126368	DOWN	TSSK2
217308_at	23.339	-2.45794	0.020145	DOWN	OR1F2P
217339_x_at	13.8739	-2.59637	0.0311739	DOWN	CTAG1A
217388_s_at	1016.98	3.21832	0.000369257	UP	KYNU
217456_x_at	6375.64	1.06707	0.0405814	UP	HLA-E
217478_s_at	3001.41	1.19386	0.00767622	UP	HLA-DMA
217497_at	156.974	2.25499	0.0288944	UP	TYMP
217523_at	744.067	2.06517	0.0421977	UP	CD44
217529_at	136.725	2.13072	0.021207	UP	ORAI2
217552_x_at	102.017	2.11765	0.0193339	UP	CR1
217590_s_at	1044.68	1.33643	0.0264033	UP	TRPA1
217615_at	37.1906	-2.52651	0.0140663	DOWN	---
217678_at	696.077	3.74578	1.26e-06	UP	SLC7A11
217680_x_at	90.1435	-2.28469	0.007755	DOWN	RPL10
217738_at	3560.91	1.9812	0.00102926	UP	NAMPT
217739_s_at	5270.41	2.64783	9.19e-06	UP	NAMPT
217762_s_at	1884.42	2.48292	0.000246374	UP	RAB31
217763_s_at	2414.83	1.95171	0.00280479	UP	RAB31
217764_s_at	1896.76	1.53377	0.00725315	UP	RAB31
217767_at	2670.35	1.91647	0.0465029	UP	C3
217858_s_at	1653.06	1.1187	0.00250227	UP	ARMCX3
217867_x_at	3106.24	1.69051	0.00383644	UP	BACE2
217911_s_at	2016.63	1.1271	0.0204273	UP	BAG3
217933_s_at	6556.64	1.51348	0.0030544	UP	LAP3
217966_s_at	627.051	2.12538	0.0022116	UP	FAM129A
217967_s_at	1164.73	1.88801	0.00318832	UP	FAM129A
217985_s_at	1881.99	1.3233	0.0120421	UP	BAZ1A
217996_at	1512.63	2.74639	0.000349237	UP	PHLDA1
217997_at	633.038	2.75329	3.24e-05	UP	PHLDA1
217999_s_at	340.719	2.03781	0.0337375	UP	PHLDA1
218000_s_at	185.483	2.59877	0.0348475	UP	PHLDA1
218012_at	364.202	1.08506	0.0288783	UP	TSPYL2
218130_at	925.536	1.42069	0.0139158	UP	C17orf62
218141_at	75.347	2.50328	0.0405814	UP	UBE2O
218193_s_at	1279.16	1.17357	0.0159181	UP	GOLT1B
218223_s_at	543.393	1.87691	0.00793102	UP	PLEKHO1
218296_x_at	285.496	1.36627	0.00550558	UP	MSTO1
218319_at	2201.36	1.07567	0.0395209	UP	PELI1
218340_s_at	310.44	2.24271	0.00647609	UP	UBA6
218358_at	5058.79	1.40211	0.0120421	UP	CRELD2
218404_at	808.34	1.97556	0.0200721	UP	SNX10
218468_s_at	1325.89	5.42917	3.49e-06	UP	GREM1
218469_at	1504.54	4.04215	3.18e-07	UP	GREM1
218472_s_at	791.883	1.03362	0.022035	UP	PELO
218498_s_at	854.088	1.46419	0.0346369	UP	ERO1L
218541_s_at	1743.7	2.81873	0.00267661	UP	C8orf4
218627_at	1110.75	1.74528	0.00187476	UP	DRAM1
218638_s_at	1159.38	1.52423	0.0149791	UP	LOC100130872
218660_at	771.457	1.97702	0.000879285	UP	DYSF
218681_s_at	2162.78	1.18204	0.0428056	UP	SDF2L1
218691_s_at	67.7528	2.35649	0.00485264	UP	PDLIM4
218699_at	665.512	1.06115	0.0367249	UP	RAB29
218700_s_at	419.088	1.31209	0.00373052	UP	RAB29
218751_s_at	326.94	1.64613	0.0286316	UP	FBXW7
218798_at	137.513	2.65407	0.00150801	UP	KRI1
218810_at	1676.15	3.52364	2.9e-06	UP	MIR6732
218812_s_at	281.069	1.31222	0.0252157	UP	ORAI2
218828_at	430.08	1.87186	0.00636535	UP	PLSCR3
218835_at	278.071	1.81171	0.0257812	UP	SFTPA1
218854_at	1070.38	1.86095	0.00908107	UP	DSE
218864_at	76.8059	1.99315	0.0140917	UP	TNS1
218871_x_at	674.617	1.4337	0.00224264	UP	CSGALNACT2
218880_at	733.417	1.37297	0.0217729	UP	FOSL2
218881_s_at	153.906	1.5218	0.0275436	UP	FOSL2
218898_at	675.603	1.0733	0.0157666	UP	FAM57A
218906_x_at	293.839	1.0991	0.0260146	UP	KLC2
218927_s_at	557.601	1.47287	0.000178688	UP	CHST12
218943_s_at	414.678	1.74994	0.00488272	UP	DDX58
218978_s_at	89.0113	2.62468	0.0115592	UP	SLC25A37
219039_at	175.357	2.1969	9.85e-05	UP	SEMA4C
219049_at	355.008	2.38519	0.00332602	UP	CSGALNACT1
219099_at	1321.74	1.27862	0.00265838	UP	C12orf5
219117_s_at	9083.92	1.38624	0.016852	UP	FKBP11
219118_at	3154.34	1.44609	0.0278445	UP	FKBP11
219134_at	281.98	1.83311	0.00492246	UP	ELTD1
219155_at	1030.51	1.31546	0.0179201	UP	PITPNC1
219181_at	662.835	2.04237	0.000107919	UP	LIPG
219210_s_at	236.134	2.30801	0.000631415	UP	RAB8B
219249_s_at	233.997	1.95589	0.00477882	UP	FKBP10
219256_s_at	289.569	1.52835	0.0187733	UP	SH3TC1
219264_s_at	104.188	1.82238	0.00612136	UP	LOC102725016
219270_at	242.967	2.87132	0.00843249	UP	CHAC1
219278_at	365.986	1.37311	0.0290925	UP	MAP3K6
219282_s_at	383.909	1.50688	0.00277832	UP	TRPV2
219290_x_at	903.145	1.9394	0.00773245	UP	DAPP1
219371_s_at	987.412	1.33524	0.00981661	UP	KLF2
219385_at	458.46	1.74402	0.0316082	UP	SLAMF8
219386_s_at	725.373	1.91643	0.0071715	UP	SLAMF8
219410_at	635.55	1.38714	0.020071	UP	TMEM45A
219418_at	999.469	-1.50627	0.00660912	DOWN	NHEJ1
219424_at	128.683	2.30405	0.00595704	UP	EBI3
219434_at	559.303	4.25769	0.00522093	UP	TREM1
219454_at	369.091	3.36217	0.0438339	UP	EGFL6
219489_s_at	686.959	1.66629	0.00467326	UP	NXN
219522_at	170.626	2.95102	0.00164279	UP	FJX1
219568_x_at	94.1232	1.94444	0.00926773	UP	SOX18
219574_at	293.868	1.39301	0.0176623	UP	2019
219584_at	134.357	2.45324	0.0067685	UP	PLA1A
219593_at	666.668	1.54395	0.0179708	UP	SLC15A3
219630_at	7364.21	2.56657	0.000864152	UP	PDZK1IP1
219647_at	53.129	2.57751	0.0218272	UP	POPDC2
219727_at	9785.22	4.1384	0.000179488	UP	DUOX2
219755_at	98.4568	1.70812	0.0469287	UP	CBX8
219777_at	775.883	1.3673	0.00283956	UP	GIMAP6
219795_at	2379.74	6.08511	1.6e-05	UP	SLC6A14
219857_at	157.038	1.79593	0.0260146	UP	PLEKHS1
219885_at	95.8875	2.38421	0.0121282	UP	SLFN12
219935_at	235.75	1.9763	0.0128566	UP	ADAMTS5
219947_at	720.215	2.9449	0.000359774	UP	CLEC4A
220006_at	73.7182	2.09326	0.0274051	UP	EFCC1
220024_s_at	165.193	-1.75577	0.0336132	DOWN	PRX
220034_at	166.363	2.14918	0.00388407	UP	IRAK3
220088_at	367.892	1.78427	0.0157982	UP	C5AR1
220149_at	105.143	-1.42373	0.0255437	DOWN	C2orf54
220162_s_at	111.071	2.09341	0.00986375	UP	CARD9
220264_s_at	58.9853	2.64554	0.00785472	UP	GPR107
220330_s_at	1521.13	1.97237	0.00195179	UP	SAMSN1
220351_at	216.565	3.42637	0.000351732	UP	ACKR4
220358_at	312.826	2.63692	5.1e-07	UP	BATF3
220377_at	137.345	2.80645	0.0326905	UP	KIAA0125
220423_at	70.1777	3.39562	0.000719786	UP	PLA2G2D
220429_at	43.8832	-1.52972	0.0488152	DOWN	NDST3
220479_at	16.916	-2.14625	0.0487093	DOWN	CPS1-IT1
220528_at	52.9743	3.08306	0.0259782	UP	VNN3
220655_at	1511.97	6.83057	3.29e-05	UP	TNIP3
220658_s_at	182.163	2.78736	0.00179506	UP	ARNTL2
220681_at	25.1569	-1.94536	0.0213742	DOWN	PRR34
220700_at	15.8798	3.26107	0.0456285	UP	---
220781_at	20.5137	-2.76616	0.0384399	DOWN	2019
220832_at	89.1014	2.72756	0.0354625	UP	TLR8
220935_s_at	313.547	2.25652	2.23e-08	UP	CDK5RAP2
221031_s_at	356.244	1.52781	0.00742027	UP	APOLD1
221059_s_at	3392.96	1.04636	0.0440981	UP	COTL1
221085_at	81.5448	1.73442	0.0260146	UP	TNFSF15
221182_at	14.7624	-2.92732	0.0317436	DOWN	MROH9
221218_s_at	1255.66	1.35841	0.0457404	UP	TPK1
221308_at	50.9389	2.82974	0.00588227	UP	FRS2
221331_x_at	108.541	2.76847	0.000701761	UP	CTLA4
221345_at	315.298	4.11182	0.0257781	UP	FFAR2
221360_s_at	17.7555	-2.31412	0.0461028	DOWN	GHSR
221538_s_at	600.572	1.48921	0.00645799	UP	PLXNA1
221559_s_at	1021.59	1.05205	0.00443794	UP	MIS12
221563_at	422.624	1.35934	0.00494439	UP	DUSP10
221698_s_at	1059.56	2.29536	0.00239068	UP	CLEC7A
221724_s_at	438.214	1.95187	0.0112183	UP	CLEC4A
221729_at	2842.12	1.89797	0.00180094	UP	COL5A2
221730_at	1450.48	1.92462	0.0120421	UP	COL5A2
221731_x_at	3054.57	1.66926	0.000915243	UP	VCAN
221755_at	457.52	1.657	0.0399873	UP	EHBP1L1
221767_x_at	6222.39	1.49627	0.00668669	UP	HDLBP
221773_at	1187.28	1.19936	0.0171584	UP	ELK3
221781_s_at	562.265	1.49107	0.00142159	UP	DNAJC10
221782_at	777.595	1.35072	0.00259356	UP	DNAJC10
221799_at	522.885	1.04779	0.0154269	UP	CHPF2
221807_s_at	224.986	2.45357	0.00130075	UP	TRABD
221845_s_at	173.872	1.80513	0.011181	UP	CLPB
221870_at	377.93	3.17135	0.00123308	UP	EHD2
221877_at	662.343	1.02708	0.0318025	UP	IRGQ
221898_at	643.402	3.98423	9.94e-06	UP	PDPN
221903_s_at	779.703	1.31352	0.00619667	UP	CYLD
221920_s_at	606.122	1.63278	0.00627756	UP	SLC25A37
222088_s_at	452.622	2.63526	0.000817593	UP	SLC2A14
222162_s_at	618.702	2.87815	3.6e-06	UP	ADAMTS1
222170_at	60.9672	-1.56709	0.0313598	DOWN	ZNF213-AS1
222221_x_at	576.094	1.35214	0.0360739	UP	EHD1
222235_s_at	429.281	2.04319	0.00350263	UP	CSGALNACT2
222263_at	228.481	1.68971	0.0072456	UP	SLC35E1
222326_at	225.94	3.20442	0.000573899	UP	---
222446_s_at	4642.35	1.13062	0.0377007	UP	BACE2
222449_at	1926.59	1.7295	0.00303944	UP	PMEPA1
222486_s_at	99.4411	2.8812	2.97e-05	UP	ADAMTS1
222529_at	1852.03	1.71364	0.0127762	UP	SLC25A37
222583_s_at	202.861	1.23192	0.0071766	UP	NUP50
222593_s_at	489.319	1.10651	0.0396973	UP	SPATS2
222613_at	746.497	1.03978	0.030743	UP	C12orf4
222646_s_at	2218.65	2.17446	0.00331536	UP	ERO1L
222656_at	331.794	1.13073	0.0298421	UP	UBE2W
222753_s_at	2594.71	1.09769	0.0395209	UP	SPCS3
222792_s_at	795.177	1.03292	0.0499358	UP	CCDC59
222793_at	582.126	1.26382	0.00773187	UP	DDX58
222802_at	1078.53	-1.13007	0.0280894	DOWN	EDN1
222856_at	142.049	2.06538	0.00646321	UP	APLN
222858_s_at	825.678	2.13445	0.0181508	UP	DAPP1
222859_s_at	528.912	2.47986	0.00349823	UP	DAPP1
222872_x_at	1078.42	2.1297	0.000178688	UP	NABP1
222904_s_at	2094.7	1.53406	0.0173573	UP	TMC5
222934_s_at	523.05	4.3393	0.000154931	UP	CLEC4E
222962_s_at	105.49	2.93764	2.23e-05	UP	MCM10
222973_at	38.2371	-2.06051	0.0486196	DOWN	---
222974_at	163.174	3.21024	0.0468968	UP	IL22
223054_at	6229.12	1.06826	0.018321	UP	DNAJB11
223121_s_at	79.138	3.48924	0.0199192	UP	SFRP2
223145_s_at	1377.34	1.35533	0.0190618	UP	AKIRIN2
223146_at	154.233	1.37095	0.0214555	UP	SFT2D3
223170_at	2902.67	-1.54423	0.00118358	DOWN	TMEM98
223217_s_at	7290.25	2.00987	0.00136843	UP	NFKBIZ
223218_s_at	9077.6	2.14745	9.32e-07	UP	NFKBIZ
223220_s_at	1658.61	1.55435	0.0274602	UP	PARP9
223235_s_at	1261.75	1.53648	0.0460026	UP	SMOC2
223249_at	2569.58	1.06878	0.0190618	UP	CLDN12
223316_at	334.545	4.06438	0.00316535	UP	CCDC3
223322_at	1274.75	1.53497	0.00661403	UP	RASSF5
223385_at	755.068	-1.9034	0.000382193	DOWN	CYP2S1
223392_s_at	292.971	1.17217	0.0387314	UP	TSHZ3
223422_s_at	185.571	1.74383	0.00245246	UP	ARHGAP24
223492_s_at	469.482	1.10093	0.0373428	UP	LRRFIP1
223501_at	988.954	1.75769	0.00463256	UP	TNFSF13B
223502_s_at	1531.55	2.20049	0.000495514	UP	TNFSF13B
223533_at	159.269	1.66478	0.0258882	UP	LOC101927933
223586_at	272.812	2.69475	0.000396513	UP	ARNTL2
223587_s_at	696.572	-2.18738	0.0416791	DOWN	AMN
223618_at	74.9566	-2.45018	0.0260466	DOWN	FMN2
223638_at	385.356	1.08519	0.0140663	UP	NBPF3
223669_at	14.3643	-3.23477	0.0287131	DOWN	HEMGN
223767_at	302.378	3.71565	7.22e-05	UP	GPR84
223796_at	77.6049	1.90263	0.0131424	UP	CNTNAP3
223834_at	295.11	2.2264	0.015585	UP	CD274
223923_at	68.3257	1.97969	0.0255829	UP	C21orf62
223937_at	111.687	-1.46356	0.00537102	DOWN	FOXP1
223980_s_at	552.567	1.42867	0.0106612	UP	SP110
223987_at	152.835	3.4849	0.0023068	UP	CHRDL2
223991_s_at	510.388	1.39132	0.00456846	UP	GALNT2
224000_at	83.1774	-1.6921	0.0247875	DOWN	C2orf16
224041_at	18.7907	-2.27597	0.0245839	DOWN	TTTY6
224215_s_at	883.759	1.31571	0.0259377	UP	DLL1
224233_s_at	159.719	1.8351	0.0172094	UP	MSTO1
224249_at	9.60388	-3.24457	0.00660912	DOWN	---
224300_x_at	50.735	-2.55999	0.0306501	DOWN	FTCD
224321_at	101.575	2.40845	0.0012594	UP	TMEFF2
224341_x_at	383.764	2.51206	0.000141471	UP	TLR4
224572_s_at	2219.47	-1.62884	0.00100169	DOWN	IRF2BP2
224602_at	3781.65	1.05077	0.0423624	UP	C4orf3
224657_at	2458.56	1.9494	0.00505891	UP	ERRFI1
224701_at	1474.66	1.4234	0.0423469	UP	PARP14
224710_at	644.43	1.02206	0.049025	UP	NARR
224739_at	2931.53	1.79202	0.00192856	UP	PIM3
224796_at	860.411	1.59333	0.00928492	UP	ASAP1
224826_at	939.984	1.58827	0.0107411	UP	GPCPD1
224831_at	668.087	1.3088	0.0399347	UP	CPEB4
224925_at	403.096	1.44066	0.0195341	UP	PREX1
224940_s_at	373.377	1.74104	0.00923563	UP	PAPPA
224942_at	221.956	1.79262	0.00492246	UP	PAPPA
225009_at	7436.76	-1.17872	0.00649513	DOWN	CMTM4
225033_at	495.709	1.95603	0.0308582	UP	ST3GAL1
225037_at	1115.46	1.09782	0.0387719	UP	SLC35C2
225059_at	560.435	1.30405	0.0134915	UP	AGTRAP
225071_at	883.171	1.2202	0.0092252	UP	NUS1
225076_s_at	1262.74	1.32842	0.0104451	UP	ZNFX1
225146_at	210.229	1.72609	0.0166635	UP	FAM219A
225159_s_at	1062.28	1.12486	0.00492246	UP	ELK4
225227_at	2247.96	1.55259	0.000614737	UP	SKIL
225239_at	3228.94	2.37955	0.00795127	UP	MIR612
225251_at	1229.69	1.35717	0.0291731	UP	RAB24
225282_at	879.158	1.06262	0.0385693	UP	SMAP2
225316_at	546.451	1.57668	0.016852	UP	MFSD2A
225344_at	9046.45	2.17271	9.61e-05	UP	NCOA7
225347_at	472.185	1.37824	0.0264033	UP	ARL8A
225367_at	1231.6	1.14952	0.00594315	UP	PGM2
225383_at	704.697	1.43824	0.00110052	UP	ZNF275
225414_at	4495.2	1.02722	0.0391393	UP	RNF149
225415_at	3439.66	1.33687	0.014569	UP	DTX3L
225442_at	877.762	1.49019	0.015422	UP	DDR2
225450_at	389.523	1.52276	0.0243772	UP	AMOTL1
225496_s_at	4041.99	-1.41308	0.0368955	DOWN	SYTL2
225516_at	85.9443	2.45785	0.0384841	UP	SLC7A2
225557_at	635.649	1.90248	0.00182425	UP	CSRNP1
225570_at	399.248	1.24005	0.00783959	UP	SLC41A1
225662_at	585.228	2.43141	0.000107914	UP	ZAK
225664_at	1869.77	2.81557	0.00272834	UP	COL12A1
225671_at	736.232	2.07276	0.00926773	UP	SPNS2
225723_at	766.736	1.34953	0.0441796	UP	CCDC167
225799_at	1901.07	2.44761	0.000347979	UP	LINC00152
225802_at	482.45	-1.23061	0.0126368	DOWN	TOP1MT
225814_at	1769.8	1.05535	0.0387314	UP	XRN1
225842_at	1215.42	2.22189	0.00423888	UP	PHLDA1
225929_s_at	2414.15	1.64471	0.0210189	UP	RNF213
225931_s_at	880.62	1.15677	0.0460076	UP	RNF213
225961_at	223.141	1.70211	0.0238614	UP	KLHL42
225973_at	1391.31	1.98933	0.000613866	UP	TAP2
225987_at	845.761	2.54077	0.00190274	UP	STEAP4
226001_at	765.488	1.98566	0.000367709	UP	KLHL5
226028_at	294.067	1.52776	0.0272426	UP	ROBO4
226077_at	6543.91	1.1068	0.0235336	UP	RNF145
226099_at	1780.97	1.77011	0.0114909	UP	ELL2
226109_at	843.499	1.38391	0.00101849	UP	C21orf91
226113_at	389.936	-1.02142	0.0421227	DOWN	ZNF436
226117_at	1657.71	1.61986	0.0154269	UP	TIFA
226150_at	2897.8	1.19838	0.0142403	UP	PPAPDC1B
226179_at	1143.98	1.77242	0.000654137	UP	SLC25A37
226189_at	820.559	1.63345	0.038085	UP	ITGB8
226218_at	2391.53	2.4792	0.00335424	UP	IL7R
226244_at	141.437	1.93499	0.0213742	UP	CLEC14A
226311_at	547.942	2.72508	0.0384399	UP	ADAMTS2
226313_at	200.565	1.31709	0.0347653	UP	C10orf35
226345_at	1751.17	1.24166	0.0060329	UP	ARL5B
226368_at	416.856	1.39179	0.046958	UP	CHST11
226372_at	638.457	1.38782	0.02466	UP	CHST11
226433_at	491.395	-1.41576	0.015729	DOWN	RNF157
226435_at	526.617	1.67446	0.0481361	UP	PAPLN
226459_at	2001	1.86468	0.0137254	UP	PIK3AP1
226465_s_at	3001.11	1.14632	0.0342778	UP	SON
226470_at	310.386	-1.10237	0.0424381	DOWN	GGT7
226474_at	1563.09	1.77222	0.00313044	UP	NLRC5
226498_at	361.31	1.78946	0.0488356	UP	FLT1
226542_at	479.433	1.90008	0.000283752	UP	RNF24
226603_at	1458.62	2	0.000701761	UP	SAMD9L
226606_s_at	368.121	1.49223	0.017934	UP	MTG2
226621_at	1001.14	1.64087	0.00681636	UP	OSMR
226633_at	1452.94	1.04765	0.0113094	UP	RAB8B
226641_at	568.326	1.63902	0.00459334	UP	ANKRD44
226653_at	73.9567	1.94479	0.0269423	UP	MARK1
226658_at	195.512	2.17007	0.0357974	UP	PDPN
226694_at	2589.5	1.32455	0.00647609	UP	AKAP2
226695_at	496.701	2.85038	0.0442924	UP	PRRX1
226701_at	80.6327	3.12023	0.000198974	UP	GJA5
226722_at	741.563	1.6947	0.00767248	UP	FAM20C
226756_at	1258.3	2.00697	0.00140147	UP	CCDC71L
226761_at	220.694	1.19817	0.0285145	UP	IKZF4
226804_at	52.4309	3.70027	0.00991635	UP	FAM20A
226814_at	450.411	2.93817	1.03e-05	UP	ADAMTS9
226884_at	52.2012	3.39458	0.0105414	UP	LRRN1
226897_s_at	532.026	1.06938	0.0147667	UP	ZC3H7A
226906_s_at	215.544	1.82163	0.00212498	UP	ARHGAP9
226931_at	415.854	1.27806	0.0397806	UP	TMTC1
226968_at	469.713	1.25157	0.0305489	UP	KIF1B
226971_at	36.0858	2.41217	0.0352087	UP	CCDC136
226982_at	611.918	1.24236	0.0175316	UP	ELL2
227013_at	1306.37	1.20348	0.0249498	UP	LATS2
227014_at	494.155	1.36798	0.0396973	UP	ASPHD2
227051_at	542.399	2.09005	0.0146935	UP	BACE2
227059_at	586.089	1.25835	0.0434526	UP	GPC6
227080_at	318.033	1.08646	0.0421227	UP	ZNF697
227099_s_at	2901.41	1.87085	0.00197047	UP	C11orf96
227107_at	763.74	1.37866	0.0341493	UP	PANX1
227125_at	758.837	1.24315	0.000365896	UP	IFNAR2
227140_at	1058.36	5.91046	4.53e-05	UP	INHBA
227152_at	487.749	1.31436	0.00390124	UP	KIAA1551
227168_at	205.37	2.37079	0.0346296	UP	MIAT
227184_at	1272.57	1.99409	0.00502529	UP	PTAFR
227194_at	657.05	5.56673	0.00177144	UP	FAM3B
227200_at	1729.28	1.40381	0.00944913	UP	ETV3
227262_at	463.193	1.87006	0.00830853	UP	HAPLN3
227289_at	265.233	1.65586	0.00311451	UP	PCDH17
227295_at	361.862	1.5595	0.00667281	UP	IKBIP
227346_at	833.725	1.36967	0.0374731	UP	IKZF1
227353_at	483.837	2.26157	0.0179854	UP	TMC8
227368_at	553.336	1.56619	0.00200491	UP	---
227370_at	330.013	1.19056	0.0446442	UP	FAM171B
227372_s_at	2164.32	1.19668	0.0137397	UP	BAIAP2L1
227404_s_at	8433.08	2.20934	0.0267255	UP	EGR1
227458_at	1522.25	3.96553	3.38e-07	UP	CD274
227494_at	52.7898	-2.89832	7.01e-05	DOWN	NR6A1
227523_s_at	671.572	1.23841	0.0251898	UP	PHF20L1
227534_at	435.528	1.6468	0.00218825	UP	AAED1
227618_at	117.73	2.20501	0.0114625	UP	---
227628_at	758.475	1.98494	0.00342147	UP	GPX8
227646_at	159.443	2.23478	0.0231808	UP	EBF1
227654_at	242.808	1.61352	0.0260351	UP	FAM65C
227664_at	27.1731	-2.93532	0.00560982	DOWN	FLJ37453
227677_at	826.533	2.13735	0.000838025	UP	JAK3
227697_at	2654.05	4.71814	2.32e-12	UP	SOCS3
227710_s_at	240.506	-1.08043	0.0463792	DOWN	TPT1-AS1
227794_at	97.0301	2.94644	0.0005059	UP	GLYATL1
227807_at	415.486	1.44328	0.0173696	UP	PARP9
227828_s_at	152.719	2.39547	0.0292453	UP	EVA1A
227845_s_at	263.526	-1.34399	0.00582735	DOWN	SHD
227856_at	631.009	1.47744	8.43e-05	UP	C4orf32
227870_at	418.859	1.46222	0.0138189	UP	IGDCC4
227883_at	29.3825	3.17916	0.0490209	UP	CCDC71L
227922_x_at	81.7162	3.11796	0.00281653	UP	LOC441124
227925_at	75.576	3.4054	0.00130494	UP	ST3GAL4-AS1
227983_at	797.839	1.41864	0.0365409	UP	RILPL2
228011_at	349.738	1.4147	0.0116089	UP	FAM92A1
228128_x_at	370.974	1.3326	0.0489794	UP	PAPPA
228152_s_at	791.717	1.8568	0.00466517	UP	DDX60L
228153_at	800.29	1.98744	0.0233796	UP	RNF144B
228176_at	494.325	1.78304	0.0280894	UP	S1PR3
228202_at	186.018	2.06703	0.0490823	UP	---
228230_at	270.685	1.74986	0.0136481	UP	HELZ2
228271_at	264.091	1.38633	0.0492569	UP	---
228275_at	184.946	3.28519	9.3e-10	UP	LINC00888
228276_at	21.4172	-1.76637	0.0371737	DOWN	SAMD1
228311_at	210.451	2.11015	0.00162185	UP	BCL6B
228325_at	246.503	2.33864	3e-05	UP	SPIDR
228335_at	69.2808	1.61087	0.017967	UP	CLDN11
228344_s_at	37.2567	-2.06699	0.0143344	DOWN	TBX3
228362_s_at	86.6928	3.81373	0.000579098	UP	FAM26F
228382_at	141.919	1.36902	0.0453457	UP	OTULIN
228390_at	256.507	1.60878	0.0497588	UP	RAB30
228410_at	176.81	2.99817	7.01e-05	UP	GAB3
228439_at	1299.59	2.05385	0.00569243	UP	BATF2
228461_at	434.154	1.25639	0.030107	UP	SH3RF3
228658_at	333.514	2.16962	0.01017	UP	MIAT
228720_at	107.823	3.16948	1.04e-06	UP	SORCS2
228745_at	406.304	1.19201	0.0387186	UP	SGTB
228754_at	996.371	1.86513	0.0319214	UP	SLC6A6
228758_at	502.66	3.76952	0.00392117	UP	BCL6
228776_at	265.172	1.83379	0.0177066	UP	GJC1
228795_at	96.2889	1.73944	0.0226527	UP	PRKCB
228825_at	447.4	-1.09897	0.008371	DOWN	PTGR1
228837_at	177.232	1.46909	0.0080367	UP	TCF4
228863_at	335.006	2.15139	0.00350263	UP	PCDH17
228869_at	548.273	2.48304	0.000866457	UP	SNX20
228907_at	239.031	-1.17386	0.0241594	DOWN	---
228955_at	297.536	2.89633	0.0010149	UP	LRP8
228964_at	2074.2	1.31245	0.0125758	UP	PRDM1
228993_s_at	5508.43	-1.69572	0.00167057	DOWN	BBIP1
229041_s_at	279.39	2.24106	0.00649513	UP	ITGB2-AS1
229062_at	45.6161	2.75054	0.0155441	UP	ARL9
229121_at	373.79	2.21867	0.0106612	UP	CMKLR1
229171_at	12.3024	-3.05406	0.00118898	DOWN	CENPBD1
229221_at	214.647	1.76359	0.0405162	UP	CD44
229228_at	108.498	3.24357	0.00202396	UP	CREB5
229244_at	64.6379	2.51288	0.0137129	UP	LSAMP
229290_at	65.1264	-1.84564	0.0473676	DOWN	DAPL1
229357_at	265.923	1.93316	0.00025933	UP	ADAMTS5
229373_at	126.417	3.16403	0.00168131	UP	---
229390_at	2466.83	3.52577	8.23e-07	UP	FAM26F
229391_s_at	1270.51	2.7046	8.18e-05	UP	FAM26F
229402_at	1120.4	-1.69781	0.0115638	DOWN	SAMD13
229414_at	144.721	2.05609	0.00205159	UP	PITPNC1
229415_at	616.065	-1.23357	0.00944913	DOWN	CYCS
229437_at	210.215	2.11311	0.00162344	UP	MIR155
229448_at	40.1675	-2.43392	0.0181787	DOWN	CERS1
229450_at	2225.23	2.33294	0.020262	UP	IFIT3
229454_at	91.474	1.8545	0.00647609	UP	BCLAF1
229521_at	1256.39	1.73374	0.020145	UP	CCDC71L
229530_at	490.666	1.92572	0.0182369	UP	GUCY1A3
229543_at	319.598	2.36088	0.00484516	UP	RP1-93H18.6
229560_at	636.655	2.17001	0.0061294	UP	TLR8
229625_at	632.53	3.63136	9.85e-05	UP	GBP5
229721_x_at	1682.36	1.76939	0.0460026	UP	DERL3
229723_at	1978.97	3.52671	0.00183557	UP	TAGAP
229769_at	21.127	-3.0323	0.00528694	DOWN	TMEM242
229770_at	136.847	2.53945	0.0122004	UP	GLT1D1
229778_at	17.7435	2.83819	0.0480106	UP	SPX
229788_s_at	75.0028	-1.50804	0.0193411	DOWN	---
229802_at	399.211	3.94263	3.49e-06	UP	WISP1
229915_at	41.2185	2.87048	0.018174	UP	FAM26F
229937_x_at	666.106	1.92762	0.0131231	UP	---
229947_at	594.63	5.61618	6.19e-06	UP	PI15
229967_at	294.24	2.51478	0.0101731	UP	CMTM2
230036_at	626.919	1.56798	0.0140891	UP	SAMD9L
230061_at	183.385	1.38777	0.0428305	UP	TM4SF18
230067_at	62.4837	2.74718	0.0204146	UP	FAM124A
230125_at	49.5828	-2.12654	0.0182007	DOWN	GUSB
230147_at	442.628	2.39939	0.00626925	UP	F2RL2
230170_at	275.144	4.28822	0.00145615	UP	OSM
230240_at	64.0495	2.35605	0.049392	UP	---
230385_at	161.102	-1.98571	0.000614737	DOWN	2019
230395_at	231.534	1.76157	0.0389706	UP	METTL9
230406_at	654.679	2.27419	0.0327357	UP	---
230430_at	110.507	-2.13066	0.0323795	DOWN	ENTPD2
230448_at	290.715	1.01501	0.0172094	UP	SLC38A10
230499_at	568.787	1.49225	0.0264033	UP	BIRC3
230511_at	131.023	1.99306	0.00337654	UP	CREM
230585_at	60.2838	2.18405	0.0387861	UP	KCNJ15
230615_at	4798.01	4.26475	0.00993476	UP	DUOXA2
230631_s_at	100.984	1.70136	0.0442924	UP	IL10RB-AS1
230673_at	59.802	2.86024	0.0257812	UP	PKHD1L1
230722_at	242.199	1.4585	0.00497023	UP	BNC2
230727_at	392.121	-1.03431	0.0159021	DOWN	CISD3
230746_s_at	794.098	3.61535	0.00157852	UP	---
230756_at	101.18	1.85044	0.038085	UP	ZNF683
230834_at	69.933	-1.25808	0.0360535	DOWN	---
230860_at	137.304	1.8047	0.017934	UP	CEP19
230915_at	19.112	-2.05834	0.0113186	DOWN	DHRS7C
230966_at	185.797	4.51975	1.85e-08	UP	IL4I1
231034_s_at	2471.24	-2.03393	0.0207659	DOWN	---
231165_at	48.7521	3.49706	0.000201054	UP	---
231224_x_at	65.535	-2.48303	0.00129046	DOWN	PRKAG2
231227_at	390.143	2.78429	0.0094371	UP	---
231269_at	251.527	1.14318	0.0113418	UP	ASCC3
231357_at	12.3021	-2.70292	0.0393269	DOWN	CLEC12B
231406_at	219.124	2.15025	0.000169443	UP	ORAI2
231409_at	30.2653	-2.49862	0.0487093	DOWN	---
231445_at	21.6066	-2.22874	0.0160563	DOWN	PAX1
231460_at	31.0234	-2.56168	0.0038666	DOWN	RP11-320N7.2
231577_s_at	6893.38	3.10076	4.29e-06	UP	GBP1
231578_at	151.412	2.74022	0.0327414	UP	GBP1
231697_s_at	469.62	1.36049	0.030107	UP	---
231766_s_at	251.653	3.33955	0.000556588	UP	COL12A1
231769_at	1019.96	1.90738	0.000295351	UP	FBXO6
231775_at	739.585	1.88164	0.000701761	UP	TNFRSF10A
231786_at	622.61	-1.30639	0.037961	DOWN	HOXA13
231841_s_at	47.274	2.57513	0.0455281	UP	KIAA1462
231879_at	178.837	4.79102	1.52e-06	UP	COL12A1
231910_at	17.9357	-2.22652	0.0461514	DOWN	NUDT14
231951_at	231.345	1.81308	0.0346314	UP	GNAO1
231956_at	466.367	2.20657	0.0119106	UP	RNF213
231978_at	29.3119	2.89319	0.00492246	UP	TPCN2
232041_at	34.1493	2.34443	0.0201358	UP	INADL
232068_s_at	170.491	1.90367	0.0156144	UP	TLR4
232134_at	57.8293	2.83618	0.0262017	UP	---
232270_at	259.286	1.11128	0.0147881	UP	C9orf3
232277_at	203.01	2.7685	0.0105939	UP	SLC28A3
232297_at	232.589	1.78789	0.00104791	UP	KLHL5
232304_at	536.574	2.04755	0.0165087	UP	AK026714
232311_at	286.022	1.811	0.0262076	UP	B2M
232375_at	410.505	1.68429	0.0183116	UP	---
232398_at	59.9114	2.12549	0.00267476	UP	CCDC150
232542_at	87.4279	-1.48194	0.0423469	DOWN	COL9A2
232563_at	104.66	-1.64147	0.00326971	DOWN	ZNF684
232629_at	825.887	6.27151	6.84e-05	UP	PROK2
232668_at	34.8011	2.25987	0.0353895	UP	---
232903_at	49.4538	2.77955	0.00808922	UP	---
232928_at	43.4724	2.54275	0.024763	UP	---
232943_at	35.9726	-2.02797	0.044934	DOWN	---
232951_at	44.6079	2.19514	0.0145174	UP	---
233085_s_at	624.175	1.89553	0.00238673	UP	NABP1
233174_at	31.4531	2.92696	0.0256185	UP	LOC100287015
233220_at	132.905	3.58641	0.000292876	UP	GRIN3A
233355_at	43.7644	1.87742	0.00290295	UP	LINC00176
233412_x_at	37.2819	-2.47138	0.0402424	DOWN	---
233527_at	426.479	-2.03456	0.0152811	DOWN	LOC101929340
233681_at	19.4187	-3.66221	0.00155434	DOWN	KRTAP3-3
233701_at	55.8042	-1.80664	0.0481361	DOWN	---
233761_at	137.059	-1.28092	0.0346314	DOWN	---
233974_s_at	355.572	-1.31434	0.046279	DOWN	FAM129B
233986_s_at	112.903	3.21908	2.95e-05	UP	PLEKHG2
234006_s_at	85.5283	1.45983	0.0400874	UP	TMEM234
234033_at	55.1903	2.72444	0.00659595	UP	---
234050_at	246.508	2.62494	0.020997	UP	TAGAP
234113_at	175.099	2.36662	0.000791832	UP	---
234224_at	64.1916	2.80949	0.015965	UP	---
234339_s_at	2710.49	-1.10442	0.0473777	DOWN	GLTSCR2
234408_at	60.2529	3.39141	0.000438171	UP	IL17F
234496_x_at	53.3069	-2.69901	0.00703964	DOWN	NYX
234610_at	75.1213	2.52839	0.000375883	UP	HSPA12B
234795_at	33.3622	-2.25686	0.0193595	DOWN	---
234803_at	17.3029	-2.84785	0.0489794	DOWN	CSTL1
234812_at	13.0262	-3.34132	0.024867	DOWN	LRRC59
234889_at	35.253	-2.24041	0.0218445	DOWN	MTND1P33
234987_at	1860.64	1.40511	0.0121122	UP	SAMHD1
235037_at	375.577	1.27037	0.0146935	UP	TMEM41A
235061_at	233.989	1.6897	0.00859267	UP	PPM1K
235075_at	98.0575	4.16466	0.0346369	UP	DSG3
235082_at	45.9561	2.30221	0.0245262	UP	PCNX
235122_at	242.32	2.66385	0.000110614	UP	HIVEP3
235157_at	221.674	2.27672	0.00250227	UP	---
235175_at	551.237	2.387	8.79e-05	UP	GBP4
235202_x_at	69.9321	1.87219	0.0260146	UP	IKBIP
235229_at	805.147	3.60612	5.48e-07	UP	---
235245_at	425.75	1.60727	0.0365691	UP	TMEM92
235252_at	649.666	1.12962	0.0188047	UP	KSR1
235291_s_at	202.392	1.45191	0.025756	UP	FLJ32255
235303_at	68.0479	-1.09577	0.0481361	DOWN	TRMT10B
235304_at	123.204	-1.25071	0.0354476	DOWN	CTD-2528L19.6
235306_at	736.631	1.38625	0.0161437	UP	GIMAP8
235368_at	345.152	1.34903	0.00759307	UP	ADAMTS5
235371_at	380.892	-1.38148	0.0190618	DOWN	GXYLT2
235391_at	413.658	1.32241	0.0146935	UP	FAM92A1
235407_at	220.466	1.51521	0.000382193	UP	RABGEF1
235411_at	58.9596	2.12839	0.0137129	UP	PGBD1
235419_at	163.571	1.80039	0.0455281	UP	---
235508_at	359.136	1.63913	0.0439167	UP	PML
235529_x_at	2747.48	1.2075	0.0228496	UP	SAMHD1
235568_at	307.313	3.39719	0.0115638	UP	MCEMP1
235574_at	161.787	3.37479	0.000590627	UP	GBP4
235670_at	231.311	2.64189	0.000326125	UP	STX11
235680_at	225.52	1.60495	0.0231962	UP	---
235740_at	280.827	1.20803	0.0290787	UP	MCTP1
235741_at	29.8816	-2.35812	0.00586371	DOWN	PPIA
235751_s_at	69.1269	3.7103	0.00145615	UP	VMO1
235773_at	66.9676	1.58163	0.0285468	UP	ZIK1
235835_at	22.159	2.62248	0.022035	UP	CTD-2619J13.17
235838_at	14.9665	-1.90982	0.049025	DOWN	NLGN2
235850_at	269.305	-1.46235	0.0405814	DOWN	FAM162A
235920_at	116.372	1.52203	0.0018521	UP	CLUHP3
235964_x_at	2353.26	1.96234	0.00866989	UP	SAMHD1
235969_at	33.8418	2.24774	0.0208393	UP	SCN8A
236019_at	135.223	2.59978	0.000177132	UP	RAB12
236033_at	28.8615	-2.35479	0.00186443	DOWN	ASB12
236039_at	86.8402	2.86054	0.0158404	UP	LYPD5
236045_x_at	997.808	3.65855	0.00987054	UP	---
236065_at	36.4255	3.78086	0.00126022	UP	---
236118_at	466.96	-1.41647	0.0387186	DOWN	GATA6-AS1
236221_at	17.0605	-3.02537	0.0124333	DOWN	AP4B1
236249_at	184.103	1.9733	0.00351078	UP	IKBIP
236322_at	369.719	1.67626	0.0171333	UP	---
236341_at	193.604	3.08977	0.00107839	UP	CTLA4
236356_at	561.988	-1.24542	0.0225974	DOWN	NDUFS1
236357_at	74.2488	1.48767	0.0059936	UP	LMBR1
236439_at	464.374	3.98417	0.00143037	UP	---
236471_at	370.333	1.72311	0.00715679	UP	NFE2L3
236495_at	193.747	3.58067	0.0105939	UP	---
236571_at	231.463	1.88289	0.0487093	UP	---
236602_at	21.0134	-2.61993	0.0369004	DOWN	---
236685_at	335.654	2.01252	0.0441648	UP	---
236747_at	23.9589	-2.53833	0.049392	DOWN	CLIP1-AS1
236777_at	59.6537	1.59494	0.0469287	UP	ZSCAN16-AS1
236787_at	118.13	2.26874	0.0264204	UP	LOC101928173
236792_at	30.1425	-2.331	0.0230714	DOWN	CFL1
236805_at	83.821	-1.58051	0.0165087	DOWN	STKLD1
236880_at	69.5793	-1.7792	0.0326905	DOWN	RAD52
236885_at	24.0759	-1.75859	0.0127762	DOWN	MEX3A
236901_at	91.635	2.47831	0.000399435	UP	---
236963_at	49.7022	3.5568	5.88e-05	UP	---
236988_x_at	61.7988	3.36878	0.01351	UP	ITGB2
237148_at	20.5602	-2.85036	0.010005	DOWN	---
237159_x_at	114.951	1.71953	0.0290925	UP	AP1S3
237163_x_at	117.562	1.47448	0.0487093	UP	LOC390705
237169_at	38.8409	3.51965	0.0256746	UP	TNC
237189_at	69.9982	1.73711	0.00659595	UP	HOXB-AS1
237252_at	89.2817	3.4376	0.000722607	UP	THBD
237271_at	38.9909	-2.44395	0.0393983	DOWN	LOC154872
237453_at	66.0097	-1.46892	0.0337005	DOWN	ZNF529
237673_at	33.5365	-3.47722	5.2e-05	DOWN	---
237745_at	130.007	-1.08637	0.0489794	DOWN	TSC22D1-AS1
237777_at	37.2619	1.71422	0.0281999	UP	PFKFB1
237833_s_at	106.09	1.68385	0.0260146	UP	SNCAIP
237840_at	22.005	-1.57442	0.0452715	DOWN	LINC01118
237912_at	28.8574	-2.73203	0.0134586	DOWN	---
238025_at	1685.86	1.42119	0.00787357	UP	MLKL
238027_at	102.057	1.47907	0.00793102	UP	SPATA24
238059_at	20.8515	-3.15095	0.000547271	DOWN	---
238141_s_at	24.6344	-2.20992	0.00691138	DOWN	LOC100996246
238275_at	24.8923	-2.20094	0.0142077	DOWN	HAP1
238327_at	476.994	1.21124	0.015284	UP	ODF3B
238423_at	202.726	1.46929	0.00693824	UP	SYTL3
238429_at	237.957	1.78357	0.00773245	UP	TMEM71
238439_at	2956.63	2.42788	0.00118426	UP	ANKRD22
238512_at	275.805	1.47099	0.0394953	UP	WNT2B
238524_at	208.508	1.14706	0.0387186	UP	DENND2D
238531_x_at	159.782	1.57705	0.0235919	UP	---
238581_at	515.701	3.88408	0.0175834	UP	GBP5
238613_at	182.511	1.23122	0.0421227	UP	ZAK
238629_x_at	101.718	2.68494	0.00371817	UP	---
238649_at	127.588	1.73067	0.0123393	UP	PITPNC1
238669_at	511.075	1.64048	0.0336132	UP	PTGS1
238674_at	62.707	3.20403	0.0240159	UP	---
238689_at	148.233	2.27201	0.0388537	UP	GPR110
238714_at	305.911	1.47541	0.0118803	UP	---
238725_at	2497.98	2.26096	0.000145002	UP	IRF1
238746_at	147.295	-1.3817	0.0243926	DOWN	PXMP4
238852_at	65.827	3.23538	0.0260146	UP	PRRX1
238859_at	118.218	1.83809	0.000160514	UP	FAM149B1
238941_at	22.0535	-2.40331	0.0231962	DOWN	TRIM50
238949_at	675.347	1.99157	0.0011033	UP	RNF145
238954_at	57.8006	1.95337	0.00573584	UP	---
238968_at	31.1941	-2.25695	0.0469287	DOWN	---
238980_x_at	51.5779	-1.97306	0.00045847	DOWN	ENTHD2
238987_at	190.91	2.03744	0.00239693	UP	B4GALT1
239177_at	74.0392	1.8635	0.011006	UP	IRGQ
239196_at	1214.18	2.03177	0.00582317	UP	ANKRD22
239234_at	114.216	2.16898	0.0113094	UP	---
239297_at	163.31	-1.29732	0.0199847	DOWN	KIAA1456
239303_at	205.028	-1.6133	0.0044932	DOWN	PIWIL2
239325_at	27.075	2.17411	0.0365404	UP	DNAJC27-AS1
239433_at	99.8904	1.75858	0.0250876	UP	LRRC8E
239451_at	241.152	1.33088	0.0204146	UP	---
239531_at	152.155	-1.12036	0.0240663	DOWN	---
239555_at	106.184	2.29991	0.0283467	UP	---
239629_at	1505.33	1.9437	0.0470713	UP	---
239764_at	39.4489	1.669	0.0286579	UP	ITPR1-AS1
239835_at	313.259	1.09941	0.0173003	UP	KBTBD8
239876_at	217.904	1.89407	0.0409728	UP	---
239946_at	167.701	1.6838	0.045096	UP	---
239979_at	447.186	2.12215	0.0273326	UP	---
240176_at	99.8454	3.30853	1.95e-05	UP	RP11-803D5.4
240223_at	30.3815	-2.11847	0.0146935	DOWN	SLC2A9
240232_at	240.112	2.80336	0.00550966	UP	---
240241_at	136.854	1.02378	0.040833	UP	---
240287_at	163.877	3.34459	0.0345848	UP	IRG1
240303_at	3500.6	2.03942	0.0139158	UP	TMC5
240421_x_at	62.9631	1.64635	0.00942967	UP	SAV1
240533_at	43.37	2.10415	0.0101938	UP	---
240535_at	126.465	-1.1671	0.0395732	DOWN	---
240581_at	26.873	-3.19977	0.00353627	DOWN	AJ606316
240690_at	1001.6	-1.47672	0.0346218	DOWN	---
240763_at	21.5862	-2.22067	0.0330367	DOWN	---
240832_at	13.337	-3.47622	0.00352132	DOWN	---
240833_at	20.6349	-2.67539	0.00991635	DOWN	---
241031_at	573.721	3.43655	7.68e-05	UP	C2CD4A
241153_at	16.1386	-2.21859	0.049392	DOWN	---
241189_at	20.4349	-2.3786	0.0182369	DOWN	---
241272_at	53.5763	3.1784	0.00166169	UP	---
241285_at	171.725	-1.31109	0.0011033	DOWN	---
241308_at	27.6646	2.4454	0.0402799	UP	LINC01255
241353_s_at	373.311	1.06083	0.017934	UP	LOC100507507
241473_at	43.9561	3.10869	0.00078987	UP	---
241567_at	12.2792	-3.76794	0.0203051	DOWN	---
241578_x_at	13.6675	-3.46389	0.00980264	DOWN	---
241583_x_at	18.7114	3.44007	0.0387186	UP	---
241661_at	31.4185	-2.14864	0.0287131	DOWN	JMJD1C
241732_at	28.0555	-2.67608	0.0157982	DOWN	---
241811_x_at	14.9379	-2.82132	0.0468968	DOWN	SLC6A4
241872_at	78.3783	2.83751	0.017967	UP	---
241891_at	233.067	2.67983	0.000732647	UP	---
241893_at	137.021	2.25586	0.00659595	UP	---
241969_at	35.1418	-2.47543	0.033909	DOWN	ARID5B
242008_at	387.827	1.58039	0.0249337	UP	---
242029_at	86.2933	2.73079	0.0171192	UP	---
242060_x_at	123.292	1.92931	0.0200721	UP	PHF11
242077_x_at	125.505	-1.39601	0.0373538	DOWN	MB21D1
242222_at	126.761	-2.07165	0.048107	DOWN	LINC01106
242287_at	104.362	1.66578	0.0196225	UP	CLIP1
242335_at	234.859	1.65304	0.00350403	UP	SLC25A37
242388_x_at	267.212	2.58179	0.00243695	UP	TAGAP
242414_at	1528.21	-1.42326	0.0333517	DOWN	LOC101929880
242493_at	24.1283	-2.79514	0.049392	DOWN	PTPRD
242521_at	352.91	1.02565	0.0273326	UP	LOC100505812
242563_at	38.3665	4.70544	8.43e-05	UP	---
242717_at	63.0207	-1.68424	0.0441796	DOWN	---
242775_at	233.874	-1.06732	0.0463512	DOWN	---
242813_at	108.772	1.68187	0.0285463	UP	---
242827_x_at	280.308	2.58733	0.0251064	UP	---
242898_at	137.872	-2.05049	0.00150801	DOWN	EIF2AK2
242911_at	123.284	1.70295	0.0195567	UP	MED13L
242993_at	151.164	-1.33677	0.0158404	DOWN	---
242996_at	84.6974	1.92822	0.0499093	UP	MTRF1
243030_at	186.34	2.07599	0.00878737	UP	---
243090_at	22.8579	2.63591	0.0288783	UP	---
243220_at	68.4136	-1.30808	0.00679249	DOWN	---
243271_at	423.251	3.06874	0.0011033	UP	---
243296_at	2892.24	3.8644	5.1e-07	UP	NAMPT
243313_at	36.4743	-1.98021	0.0420178	DOWN	SYNPO2L
243392_at	13.8768	-2.53289	0.030107	DOWN	USP49
243395_at	515.852	3.25671	1.74e-05	UP	---
243478_at	20.5562	3.14168	0.0174479	UP	CHST2
243496_at	125.669	2.1966	0.00171807	UP	RAB18
243538_at	45.1889	1.75882	0.0262576	UP	---
243608_at	62.102	2.60595	0.00628536	UP	COG2
243703_x_at	21.7042	-2.70178	0.0496224	DOWN	LIPE-AS1
243720_at	189.352	2.03838	0.00582735	UP	---
243819_at	82.2719	2.49071	0.0324948	UP	---
243861_at	32.8769	2.86971	0.0285145	UP	FNIP1
243902_at	52.1965	2.10514	0.00192946	UP	---
243907_at	59.9233	-1.72049	0.0174528	DOWN	GREB1L
243916_x_at	852.602	1.41655	0.0252447	UP	UBLCP1
243947_s_at	87.9062	-1.32698	0.0136481	DOWN	---
243949_at	11.31	-3.59122	0.0100099	DOWN	---
244032_at	458.5	-2.00014	0.0434162	DOWN	RP11-33O4.1
244057_s_at	62.7139	2.20198	0.00823745	UP	VSTM4
244232_at	10.9018	-2.60723	0.0414685	DOWN	---
244251_at	207.845	1.82399	0.00875732	UP	LCP2
244313_at	325.885	2.37741	1.48e-05	UP	CR1
244373_at	102.006	1.95417	0.0457404	UP	---
244523_at	118.655	1.3099	0.0255064	UP	MMD
244550_at	123.284	1.29028	0.0252835	UP	---
244598_at	207.234	2.02122	0.0010954	UP	LCP2
244626_at	116.248	-1.99544	0.0371766	DOWN	---
244665_at	133.992	3.35111	4.83e-05	UP	---
244811_at	221.135	1.16125	0.0262471	UP	PHIP
244845_at	45.585	2.2791	0.0488152	UP	---
244890_at	29.6445	-1.92952	0.0080367	DOWN	---
33304_at	2709.83	1.77633	0.0127845	UP	ISG20
35150_at	750.788	1.26683	0.0324948	UP	CD40
35254_at	1016.26	1.13879	0.00337831	UP	TRAFD1
36711_at	3615.62	2.69657	1.37e-06	UP	MAFF
36742_at	2219.76	1.70557	0.030743	UP	TRIM15
37408_at	1166.96	1.03589	0.00290295	UP	MRC2
38037_at	523.679	3.87915	0.000701761	UP	HBEGF
38241_at	808.466	1.28677	0.0233796	UP	BTN3A3
38671_at	858.931	1.26694	0.016852	UP	PLXND1
39402_at	3960.11	5.04066	3.16e-14	UP	IL1B
40420_at	769.13	1.1786	0.023647	UP	STK10
41037_at	328.007	1.51398	0.0127762	UP	TEAD4
41469_at	13013.1	3.72211	0.000403032	UP	PI3
47550_at	107.48	1.46712	0.0241425	UP	LZTS1
52255_s_at	244.05	1.56819	0.015965	UP	COL5A3
56197_at	1104.53	1.11907	0.00205159	UP	PLSCR3
81737_at	130.157	-1.8482	0.0105939	DOWN	LOC100505915
823_at	297.191	1.50014	0.0376306	UP	CX3CL1
AFFX-HUMISGF3A/M97935_3_at	4405.85	1.70468	0.000325716	UP	STAT1
AFFX-HUMISGF3A/M97935_MA_at	637.074	2.30133	0.000171736	UP	STAT1
AFFX-HUMISGF3A/M97935_MB_at	699.712	2.10375	0.00190423	UP	STAT1
