# Supplementary material for: Profiling the lncRNA-miRNA-mRNA ceRNA network to reveal potential crosstalk between inflammatory bowel disease and colorectal cancer
Source: PeerJ. 2019 Aug 26;7:e7451. doi: 10.7717/peerj.7451 (PMC6714963; doi:10.7717/peerj.7451)
Supplement: Table S3 [file peerj-07-7451-s003.xlsx]

## Sheet: Supplymentary Table 3 DEG_GSE41
Probe.Set.ID	Mean	log2(FC)	Pvalue	change	Gene.Symbol
1558329_at	96.0056	1.46016	0.0497715	UP	TONSL
217624_at	41.3868	1.13104	0.0497665	UP	PDAP1
224343_x_at	11.4247	-1.25931	0.0496886	DOWN	YME1L1
225575_at	503.087	-1.08756	0.0495318	DOWN	LIFR
1561737_at	44.8035	-1.01809	0.0494628	DOWN	---
1554296_at	16.5202	-1.36424	0.0492401	DOWN	CYP19A1
1557094_at	40.2346	-1.09914	0.0492222	DOWN	LOC100996760
228148_at	42.5527	1.25783	0.0492153	UP	ZNF584
206669_at	78.0651	1.19562	0.0490441	UP	GAD1
233827_s_at	394.627	1.13788	0.0483482	UP	SUPT16H
228004_at	1285.09	1.05072	0.047756	UP	LINC00261
1562582_at	12.6431	1.28468	0.0474561	UP	AK054988
1556822_s_at	22.6907	1.00035	0.0474038	UP	ZNF837
1558887_at	42.1107	1.09255	0.0473507	UP	ZNF321P
205654_at	811.125	-1.05591	0.0473413	DOWN	C4BPA
1552914_a_at	94.9824	1.12835	0.0471872	UP	CD276
242948_x_at	10.3326	-1.26426	0.0471872	DOWN	---
236883_at	83.9657	-1.16341	0.0469151	DOWN	---
236216_at	55.2726	-1.07477	0.0465811	DOWN	---
231879_at	490	1.08163	0.0465524	UP	COL12A1
213369_at	490.824	1.36703	0.0464078	UP	CDHR1
227834_at	33.941	-1.00603	0.0463568	DOWN	TXLNB
230302_at	75.2026	1.05728	0.0461023	UP	RP11-48B3.4
240439_at	55.7173	-1.10495	0.0460738	DOWN	RP11-420K14.2
204281_at	393.2	1.18546	0.0459597	UP	TEAD4
229529_at	251.359	-1.06102	0.0457599	DOWN	TCF21
240691_at	15.428	-1.08072	0.0455936	DOWN	---
223123_s_at	48.8077	1.23925	0.0455366	UP	PITHD1
230193_at	22.1852	-1.2191	0.0454499	DOWN	WDR66
205627_at	795.364	-1.04276	0.0453154	DOWN	CDA
241399_at	49.2413	1.16308	0.0453154	UP	FAM19A2
206033_s_at	90.6078	1.31308	0.0453041	UP	DSC3
233372_at	19.9894	-1.11151	0.0451519	DOWN	---
214868_at	84.6434	1.04432	0.0447737	UP	PIWIL1
41469_at	8546.89	-1.1043	0.0446834	DOWN	PI3
210828_s_at	65.8729	1.19724	0.0446707	UP	ARNT
231814_at	971.663	1.42571	0.0446511	UP	MUC12
1561937_x_at	2626	-1.06696	0.0445463	DOWN	IGHA1
220810_at	15.3562	-1.51461	0.0443566	DOWN	CLCA3P
244592_at	126.647	-1.09973	0.0443502	DOWN	---
220505_at	18.4193	-1.07401	0.0442904	DOWN	C9orf53
242372_s_at	300.346	1.9525	0.0442904	UP	MFSD4
237993_at	44.9231	-1.09875	0.0442824	DOWN	CHCHD5
211199_s_at	37.1972	1.20697	0.0441897	UP	ICOSLG
1553486_a_at	81.3631	-1.16943	0.0440526	DOWN	C17orf78
229868_s_at	35.1192	1.07595	0.0437561	UP	GDF15
239271_at	55.17	1.08759	0.0437561	UP	SMAD2
209602_s_at	28.0855	-1.49657	0.043741	DOWN	GATA3
1563856_at	18.5648	-1.12741	0.0436119	DOWN	---
229378_at	92.4799	1.11821	0.0433328	UP	STOX1
219693_at	214.04	-1.07163	0.0431876	DOWN	AGPAT4
1554997_a_at	549.367	1.71482	0.0431669	UP	PTGS2
1562332_at	46.006	-1.10411	0.0431029	DOWN	---
238116_at	18.7347	-1.13837	0.0426714	DOWN	DYNLRB2
239818_x_at	153.294	1.18808	0.0423925	UP	TRIB1
240273_at	34.3677	1.18867	0.0419004	UP	RP11-39H13.1
234853_s_at	21.3894	1.18741	0.0418019	UP	EFCAB6
219742_at	126.962	1.04808	0.0416025	UP	PRR7
241121_at	59.2023	1.04603	0.041531	UP	---
1564640_at	13.0884	-1.32742	0.0412126	DOWN	MGA
1554636_at	37.8469	-1.16653	0.0410579	DOWN	---
224271_x_at	23.9955	1.0502	0.0410235	UP	FRMD8P1
207580_at	17.9383	-1.32222	0.0409258	DOWN	MAGEB4
220039_s_at	76.2677	1.15681	0.0408521	UP	CDKAL1
220503_at	28.9948	-1.90453	0.0407604	DOWN	SLC13A1
234790_at	30.988	1.12512	0.0405453	UP	---
230430_at	74.7807	1.08464	0.0404144	UP	ENTPD2
200831_s_at	1091.95	1.15905	0.0400785	UP	SCD
217564_s_at	90.3569	-1.13515	0.040063	DOWN	CPS1
240657_at	26.7684	-1.13332	0.0385446	DOWN	---
1561861_a_at	40.0123	-1.06886	0.0384629	DOWN	---
1553589_a_at	4777.52	-1.23453	0.0383374	DOWN	PDZK1IP1
233471_at	23.57	1.10815	0.0382877	UP	PTPN5
206975_at	21.6042	-1.00751	0.0375326	DOWN	LTA
242660_at	98.6512	-1.53165	0.037335	DOWN	MALRD1
211804_s_at	198.4	1.16398	0.0369291	UP	CDK2
210548_at	106.675	-1.45449	0.0369154	DOWN	CCL23
229591_at	30.3736	1.11806	0.0368587	UP	LRP5
219630_at	5453.29	-1.14828	0.0368054	DOWN	PDZK1IP1
220582_at	12.94	-1.18814	0.036766	DOWN	---
232934_at	21.7872	-1.06379	0.0367314	DOWN	---
206237_s_at	114.895	-1.31495	0.0365014	DOWN	NRG1
214827_at	41.7338	1.58473	0.0364658	UP	PARD6B
219422_at	30.123	1.04586	0.0364658	UP	ESPN
238466_at	54.1146	1.12765	0.0364658	UP	---
207104_x_at	343.536	-1.12923	0.036291	DOWN	LILRB1
206126_at	125.121	-1.69845	0.0362543	DOWN	CXCR5
232947_at	25.1673	-1.36398	0.0362543	DOWN	---
1555753_x_at	59.6681	-1.22982	0.0360718	DOWN	ERVH-6
205890_s_at	3840.72	-1.07829	0.0360105	DOWN	GABBR1
211303_x_at	120.127	-1.2459	0.0357942	DOWN	FOLH1B
217648_at	29.0489	-1.0561	0.0356109	DOWN	---
231299_at	41.7465	1.47777	0.0355904	UP	AGAP3
1563655_at	23.6886	-1.02264	0.0355831	DOWN	TNNT2
206741_at	122.853	1.14883	0.0355571	UP	SSUH2
238741_at	174.043	-1.00882	0.0354337	DOWN	FAM83A
228352_at	67.0983	-1.25395	0.0353397	DOWN	UNC13D
242935_at	46.824	1.00736	0.0352373	UP	SBF2
1557430_at	22.579	1.4876	0.035186	UP	SMIM17
236628_at	24.6784	-1.08404	0.0351192	DOWN	---
1552851_at	15.3632	1.4209	0.035086	UP	ZSCAN4
1558406_a_at	33.1252	1.11828	0.0349745	UP	---
233988_x_at	33.3143	1.05708	0.0348423	UP	SCUBE1
238355_at	16.6011	1.70222	0.0348052	UP	---
243194_at	53.9569	-1.00775	0.0344685	DOWN	ZNF551
215989_at	26.9282	1.33692	0.034375	UP	CBX2
237472_at	43.3061	1.4724	0.034375	UP	SOX1
236038_at	89.5007	-1.03094	0.0343711	DOWN	RNF150
210861_s_at	85.8555	1.59682	0.0343287	UP	WISP3
216168_at	35.7414	-1.08963	0.0342813	DOWN	---
244115_at	59.829	1.02695	0.0342536	UP	FAM126A
229947_at	397.078	1.12125	0.0341657	UP	PI15
207091_at	65.5278	-1.11718	0.0340772	DOWN	P2RX7
208791_at	1630.5	-1.327	0.0340707	DOWN	CLU
234823_at	36.5401	-1.00859	0.0340682	DOWN	---
211276_at	45.2338	-1.00176	0.0340389	DOWN	TCEAL2
241716_at	34.2203	1.60244	0.0339518	UP	HSPD1
211518_s_at	273.151	1.46495	0.0337983	UP	BMP4
1556794_at	45.0693	1.12105	0.0336497	UP	---
235665_at	13.5428	-1.01003	0.0335539	DOWN	AC018766.6
236433_at	27.0785	1.17087	0.0335386	UP	LOC100506713
236092_at	68.1806	1.06935	0.033538	UP	---
216913_s_at	206.819	1.18987	0.033386	UP	RRP12
209807_s_at	64.0561	1.08291	0.0333647	UP	NFIX
205156_s_at	139.814	1.15943	0.0332952	UP	ASIC1
228599_at	244.601	-1.34099	0.0330322	DOWN	MS4A1
205044_at	150.574	-1.28164	0.0329934	DOWN	GABRP
214216_s_at	113.385	1.19995	0.0329285	UP	LARP4B
242548_x_at	19.6362	-1.1518	0.0328047	DOWN	ANKRD37
231887_s_at	203.251	1.37963	0.0327749	UP	PALD1
238746_at	91.7525	1.13842	0.0326896	UP	PXMP4
216454_at	12.6014	-1.35706	0.0326667	DOWN	TRMT1
1554335_at	26.6178	-1.19843	0.0325725	DOWN	CYTH4
239568_at	69.26	-1.16677	0.0323903	DOWN	PLEKHH2
209995_s_at	396.582	-1.8389	0.0323224	DOWN	TCL1A
205064_at	125.361	-1.45825	0.0322707	DOWN	SPRR1B
230392_at	92.4333	-1.13554	0.0322707	DOWN	---
241162_at	31.7948	-1.05704	0.0322185	DOWN	---
227339_at	244.183	1.297	0.0319999	UP	RGMB
231452_at	47.4331	-1.05062	0.0318655	DOWN	HRASLS5
207368_at	29.4552	1.12976	0.0318018	UP	HTR1D
1556889_s_at	14.6403	-1.30852	0.031741	DOWN	LOC101927121
209881_s_at	183.512	-1.07068	0.0313667	DOWN	LAT
207697_x_at	469.077	-1.03128	0.0313121	DOWN	LILRB2
1560240_at	24.9773	-1.16701	0.0313071	DOWN	LINC01293
208206_s_at	310.612	-1.01784	0.0312776	DOWN	RASGRP2
1557225_at	86.7836	1.13546	0.0311728	UP	ASPG
215621_s_at	245.014	-1.65827	0.0310416	DOWN	IGHD
223489_x_at	198.057	1.07286	0.0309178	UP	EXOSC3
228649_at	222.355	1.06021	0.030694	UP	NOTUM
220333_at	158.918	1.11886	0.0306178	UP	PAQR5
205869_at	91.49	1.7812	0.0305716	UP	PRSS1
230342_at	15.1926	1.15721	0.0305522	UP	FOXK1
210113_s_at	87.6117	-1.40715	0.0303817	DOWN	NLRP1
1438_at	1098.25	1.0178	0.0302958	UP	EPHB3
1557475_at	15.3518	1.44715	0.0302691	UP	LINC00507
244606_at	29.7686	1.25718	0.0302568	UP	---
1558976_x_at	27.2209	1.01676	0.030199	UP	UBALD1
230684_at	67.2674	1.07642	0.0301697	UP	GTPBP10
223691_at	66.3569	-1.04501	0.0300574	DOWN	RGS22
231645_s_at	18.9949	-1.27749	0.0300309	DOWN	---
210044_s_at	158.044	-1.22162	0.0297423	DOWN	LYL1
215967_s_at	142.533	-1.17436	0.0295124	DOWN	LY9
231351_at	71.1993	1.03172	0.0294476	UP	---
237156_at	72.9295	-1.37583	0.0293808	DOWN	---
219667_s_at	399.749	-1.22221	0.0291297	DOWN	BANK1
214928_at	77.949	-1.10423	0.029114	DOWN	OBSL1
1552772_at	119.373	-1.34417	0.0289321	DOWN	CLEC4D
237230_at	42.7141	-1.08792	0.0288733	DOWN	GPHA2
206754_s_at	643.455	1.37407	0.0288366	UP	CYP2B6
237020_at	14.6832	-1.09059	0.0288322	DOWN	CATSPERD
232261_at	24.1952	1.16137	0.0287889	UP	---
233436_at	29.8673	1.12681	0.028787	UP	MTBP
233011_at	75.3182	-1.08495	0.0285493	DOWN	ANXA1
205499_at	379.012	1.08876	0.0285184	UP	SRPX2
231442_at	15.8541	-1.29563	0.0284562	DOWN	ZPBP2
236421_at	44.8551	-1.11162	0.0284137	DOWN	ANKRD45
231131_at	19.0174	-1.22407	0.0283812	DOWN	FAM133A
211636_at	112.061	-1.22375	0.0282662	DOWN	IGHA1
235042_at	70.5032	-1.05557	0.0282585	DOWN	XIRP1
235736_at	104.815	1.20863	0.028164	UP	SMKR1
210165_at	12.5062	1.13719	0.0279683	UP	DNASE1
223235_s_at	1152.53	1.14571	0.0278426	UP	SMOC2
216557_x_at	8783.89	-1.24352	0.0275821	DOWN	IGHA1
235050_at	52.7907	1.02001	0.0275819	UP	SLC2A12
230831_at	136.928	1.38362	0.0274345	UP	FRMD5
216984_x_at	17130.2	-1.03725	0.0274235	DOWN	CKAP2
225233_at	177.734	1.00689	0.0272221	UP	MSI2
242625_at	602.555	-1.12252	0.0271679	DOWN	RSAD2
1567240_x_at	44.3414	-1.2128	0.0271542	DOWN	OR2L2
211794_at	275.656	-1.09559	0.027062	DOWN	FYB
211634_x_at	7029.99	-1.26637	0.0264417	DOWN	IGHM
206749_at	39.5585	-1.24318	0.0262773	DOWN	CD1B
1562766_at	10.6426	-1.1501	0.0262292	DOWN	---
230661_at	77.3433	1.34096	0.0262028	UP	---
212466_at	95.5366	1.1123	0.0261962	UP	SPRED2
239950_at	73.5151	1.55664	0.0261962	UP	HOXA11-AS
1563903_x_at	52.1215	-1.00847	0.026108	DOWN	---
217426_at	16.1749	1.09114	0.0260253	UP	---
206337_at	584.082	-1.0171	0.0258212	DOWN	CCR7
240754_at	37.4181	-1.10556	0.0257815	DOWN	LOC284933
221102_s_at	401.241	1.1691	0.0257537	UP	TRPM6
1563809_a_at	108.519	1.02238	0.0256195	UP	MCF2L
235914_at	109.185	-1.16525	0.0256195	DOWN	SYNPO
1566832_at	15.6615	1.03084	0.0251691	UP	TOP1P2
1570105_at	69.1588	-1.11436	0.0251628	DOWN	RP5-963E22.5
232166_at	75.8823	1.04002	0.0249962	UP	KIAA1377
224753_at	405.784	1.01522	0.0249069	UP	CDCA5
211635_x_at	5189.96	-1.56911	0.0249048	DOWN	IGHA1
1563821_at	78.6031	1.06077	0.0248393	UP	LINC00858
216614_at	31.826	-1.56498	0.0248214	DOWN	---
207398_at	18.1686	1.30588	0.0247808	UP	HOXD13
1556355_x_at	89.277	1.07158	0.0246036	UP	RGL3
221911_at	218.831	1.168	0.0246036	UP	ETV1
229542_at	13.9518	1.26184	0.0246036	UP	C20orf85
238674_at	86.282	-1.02276	0.0246036	DOWN	---
221462_x_at	72.2731	1.12758	0.0245491	UP	KLK15
215946_x_at	15994.3	-1.0795	0.0244285	DOWN	IGLL3P
206389_s_at	124.227	1.29733	0.024297	UP	PDE3A
222546_s_at	226.556	1.21355	0.0241813	UP	EPS8L2
201130_s_at	1777.43	1.02038	0.0241305	UP	CDH1
205210_at	104.162	1.27936	0.0241256	UP	TGFBRAP1
243882_at	66.853	-1.42631	0.0239557	DOWN	---
210439_at	104.767	-1.58075	0.0238768	DOWN	ICOS
232956_at	16.9001	-1.16498	0.0238737	DOWN	---
222253_s_at	43.749	-1.15583	0.0238675	DOWN	POM121L9P
213674_x_at	555.651	-2.43954	0.0238269	DOWN	IGHD
1553565_s_at	167.054	1.12625	0.0235982	UP	DDAH1
211879_x_at	51.9279	1.17073	0.023447	UP	PCDHGA3
205164_at	280.486	1.26814	0.0234357	UP	GCAT
221040_at	111.53	1.13012	0.0234062	UP	CAPN10
238914_at	12.9871	-1.65681	0.0233417	DOWN	DCC
213747_at	41.2412	1.33083	0.0232452	UP	---
216360_x_at	197.935	1.05962	0.0232059	UP	RRP12
1564548_at	28.4795	-1.21247	0.0231925	DOWN	LOC642620
230809_at	10.48	-1.14383	0.0231852	DOWN	---
236045_x_at	426.263	-1.24853	0.0231515	DOWN	---
1552908_at	42.3107	-1.0242	0.0230897	DOWN	GCSAML
1555383_a_at	1049.57	1.08318	0.0230708	UP	POF1B
231859_at	50.5597	-1.10528	0.0230449	DOWN	C14orf132
208438_s_at	559.313	-1.09304	0.0229201	DOWN	FGR
205531_s_at	60.1491	1.18472	0.0228657	UP	GLS2
211442_x_at	106.696	1.13086	0.0228552	UP	CYP3A43
205778_at	150.374	-2.19841	0.022752	DOWN	KLK7
214598_at	1692.27	2.33507	0.0227383	UP	CLDN8
1556854_at	18.2704	-1.16109	0.0227154	DOWN	ATP11A-AS1
208792_s_at	1210.62	-1.10904	0.0227154	DOWN	CLU
203946_s_at	292.996	1.4841	0.0227144	UP	ARG2
235885_at	66.745	-1.16996	0.022642	DOWN	P2RY12
240389_at	839.818	1.58534	0.022609	UP	TRPM6
236198_at	121.853	-1.2994	0.0225475	DOWN	LINC01215
204364_s_at	282.857	1.1446	0.0224718	UP	REEP1
231203_at	138.717	-1.15147	0.0224644	DOWN	LOC100505478
215072_x_at	26.1745	1.25594	0.0224628	UP	EDRF1
1555264_a_at	50.4804	1.14233	0.0224114	UP	LINC00598
234390_x_at	339.123	-1.024	0.0224051	DOWN	IGHV3-54
228678_at	70.9009	-1.18844	0.0223916	DOWN	DENND6B
1567357_at	15.9111	-1.26935	0.0223266	DOWN	NAV2
216853_x_at	3957.26	-1.49925	0.0223266	DOWN	IGLJ3
215437_x_at	38.5509	1.15011	0.0223186	UP	BAZ2A
208492_at	76.1482	1.32424	0.0222756	UP	RFXAP
230615_at	2193.74	-1.83138	0.022257	DOWN	DUOXA2
209776_s_at	116.426	1.44151	0.0222396	UP	LOC101928717
233986_s_at	96.9686	-1.07405	0.0222087	DOWN	PLEKHG2
237923_at	40.4375	1.26192	0.0221812	UP	---
206604_at	137.076	1.16653	0.0221571	UP	OVOL1
203213_at	2014.18	1.06533	0.0219551	UP	CDK1
1565769_at	22.4126	-1.2757	0.0218705	DOWN	---
1569941_at	21.8863	1.4005	0.021696	UP	---
206293_at	35.2588	1.66464	0.021696	UP	SULT2A1
217258_x_at	4281.98	-1.1874	0.021696	DOWN	IGLV1-44
236220_at	86.0682	1.01077	0.021696	UP	SLC16A10
1559917_a_at	135.699	1.34122	0.021475	UP	CBR3-AS1
219841_at	73.4071	-1.63874	0.0214454	DOWN	AICDA
206259_at	37.5244	1.14736	0.0213313	UP	PROC
222043_at	258.201	-1.51688	0.021235	DOWN	CLU
242474_s_at	36.9393	1.27222	0.0210999	UP	VMA21
1555166_a_at	34.618	1.12526	0.0210111	UP	ZNF396
236681_at	75.7199	1.24877	0.0209358	UP	HOXD13
225571_at	206.197	-1.13124	0.020898	DOWN	LIFR
211217_s_at	234.932	1.18898	0.0208799	UP	KCNQ1
234904_x_at	26.0151	-1.40726	0.0208114	DOWN	ELAVL4
244041_at	16.6784	1.0237	0.0206191	UP	STX6
216257_at	24.7174	-1.08346	0.0205976	DOWN	SERPINB13
1560678_at	20.0846	1.25158	0.0205301	UP	---
1552532_a_at	47.2264	1.50515	0.020502	UP	ATP6V1C2
242684_at	54.488	1.01858	0.0204958	UP	ZNF425
228737_at	209.575	-1.0103	0.0204537	DOWN	TOX2
1557491_at	88.0213	-1.14279	0.020443	DOWN	LOC100240728
1566981_at	28.9579	-1.15556	0.0204392	DOWN	---
238405_at	46.9786	-1.36316	0.0204392	DOWN	---
211643_x_at	10557.7	-1.0887	0.020369	DOWN	IGK
216846_at	227.505	-1.59339	0.020369	DOWN	CYAT1
1553235_at	51.5611	-1.36732	0.0203273	DOWN	PCDHAC1
1566462_at	15.0864	-1.04484	0.0203067	DOWN	---
220756_s_at	58.241	-1.57393	0.0202807	DOWN	SLC52A1
223573_s_at	38.3817	-1.05788	0.0202569	DOWN	PPP2R2C
211748_x_at	3502.67	-1.38024	0.0201085	DOWN	PTGDS
205937_at	179.447	1.15102	0.0197398	UP	CGREF1
212210_at	33.0576	1.05846	0.0196439	UP	INTS1
205534_at	224.21	-1.049	0.019641	DOWN	PCDH7
203691_at	7092.36	-1.3984	0.019576	DOWN	PI3
234571_at	54.582	-1.1307	0.0194656	DOWN	---
243000_at	145.239	1.03483	0.0194656	UP	CDK6
220384_at	10.0718	-1.3617	0.0194405	DOWN	NME8
232105_at	44.0223	1.53098	0.0194405	UP	BLACAT1
228524_at	132.557	1.16953	0.0194167	UP	ADCK5
209828_s_at	113.412	-1.42699	0.0193577	DOWN	IL16
216573_at	417.424	-1.14192	0.0192671	DOWN	IGLV1-44
236917_at	33.2786	1.11266	0.0192099	UP	LRRC34
234864_s_at	72.4103	1.14396	0.0191725	UP	TRPM6
229960_at	25.7444	1.03111	0.0191383	UP	MAP3K6
242165_at	34.8577	-1.03367	0.0191257	DOWN	LRIG2
224402_s_at	60.1399	-1.30227	0.0190163	DOWN	FCRL4
1564471_at	19.7768	1.12678	0.019011	UP	LOC100130815
204561_x_at	106.506	-1.17111	0.019011	DOWN	APOC2
235359_at	112.319	-1.31323	0.019011	DOWN	NRROS
244444_at	24.9802	-1.73088	0.0189636	DOWN	PKD1L2
236489_at	32.8554	-1.66017	0.0189084	DOWN	GPR110
214559_at	10.6739	-1.15703	0.0188525	DOWN	DRD3
1558549_s_at	344.972	-1.21623	0.0188501	DOWN	VNN1
216708_x_at	161.976	-1.05879	0.0186779	DOWN	---
215103_at	238.653	-1.15322	0.0186757	DOWN	CYP2C18
230858_at	30.5721	-1.00853	0.0186634	DOWN	LINC00673
1553317_s_at	72.2868	-1.08774	0.0185617	DOWN	GPR82
241668_s_at	39.0301	-1.28955	0.018437	DOWN	LOC101928728
1560404_a_at	16.0776	1.49806	0.0184194	UP	DPH6
226856_at	92.428	-1.17324	0.0184063	DOWN	MUSTN1
242909_at	32.342	1.66016	0.0183785	UP	---
1560911_at	117.629	-1.14117	0.0182007	DOWN	LOC100133461
214382_at	79.7883	1.39248	0.018076	UP	UNC93A
208545_x_at	27.5009	1.5627	0.018022	UP	TAF4
1562969_at	85.0249	1.06204	0.0180159	UP	DNMBP
233040_at	39.0451	1.15134	0.0179294	UP	PLEKHA5
210445_at	66.3782	1.66397	0.0178399	UP	FABP6
243680_at	46.295	-1.29204	0.0178399	DOWN	LOC100506476
208806_at	129.918	-1.16426	0.0177965	DOWN	CHD3
233376_at	60.4996	-1.04285	0.0177473	DOWN	---
223987_at	180.804	-1.31455	0.0177454	DOWN	CHRDL2
230971_x_at	20.0669	1.2989	0.0176839	UP	GLTPD2
233823_at	99.2361	1.11635	0.0174631	UP	FAM184B
214613_at	33.569	1.01634	0.0172323	UP	GPR3
242183_at	26.3415	1.35763	0.0171609	UP	IRGQ
210631_at	47.0754	1.24644	0.017128	UP	LOC101930150
236203_at	172.434	-1.51976	0.0170797	DOWN	HLA-DQA1
1559255_a_at	30.6283	-1.29763	0.0169865	DOWN	---
232154_at	91.7128	-1.07038	0.016845	DOWN	ADM5
1555062_s_at	85.4438	1.0966	0.0167136	UP	GTPBP3
1555952_at	54.5077	1.03024	0.0167136	UP	LOC101928717
229040_at	133.259	-1.11145	0.016443	DOWN	ITGB2-AS1
229290_at	68.5859	1.41405	0.0164327	UP	DAPL1
220918_at	133.628	-1.16942	0.0164325	DOWN	RUNX1-IT1
215949_x_at	3437.5	-1.19562	0.0162724	DOWN	IGHM
1557217_a_at	16.2232	1.56891	0.0162097	UP	FANCB
240422_at	423.402	1.03687	0.0161295	UP	---
203770_s_at	83.7799	-1.46323	0.0161205	DOWN	STS
228410_at	134.535	-1.17643	0.0161023	DOWN	GAB3
235458_at	309.07	-1.13975	0.0160384	DOWN	HAVCR2
236723_at	66.2213	1.02529	0.0159943	UP	---
1552511_a_at	79.4549	1.60129	0.0159242	UP	CPA6
206221_at	17.051	1.31809	0.0159242	UP	RASA3
213695_at	281.562	1.10649	0.0158452	UP	PON3
217929_s_at	178.788	1.11343	0.0158298	UP	KIAA0319L
216811_at	40.4815	-1.0548	0.0156664	DOWN	---
220059_at	274.006	-1.33231	0.0156049	DOWN	STAP1
220674_at	36.1167	-1.2911	0.0156046	DOWN	CD22
231597_x_at	20.8064	1.22438	0.0154363	UP	---
224225_s_at	108.616	-1.01076	0.0154339	DOWN	ETV7
216959_x_at	60.7721	1.04232	0.0154037	UP	NRCAM
237409_at	16.1159	-1.09661	0.0151137	DOWN	---
231801_at	28.738	1.16392	0.0150543	UP	NFATC2
229638_at	75.4932	1.3864	0.0150281	UP	IRX3
235568_at	310.928	-1.40507	0.0150281	DOWN	MCEMP1
237477_at	11.0006	1.66257	0.0150173	UP	PDCL2
1552553_a_at	121.371	-1.14688	0.014998	DOWN	NLRC4
232903_at	48.0336	-1.4311	0.0149622	DOWN	---
205439_at	39.4789	1.67818	0.0149188	UP	GSTT2
211050_x_at	168.058	1.13026	0.0149068	UP	LOC100134822
211506_s_at	2437.05	1.9996	0.0148753	UP	CXCL8
228056_s_at	137.74	-1.79809	0.0148753	DOWN	NAPSB
239062_at	66.1053	-1.1933	0.0148753	DOWN	TNRC6C-AS1
1560683_at	20.9206	-1.31678	0.0148693	DOWN	NBEAP1
211640_x_at	1532.79	-1.47998	0.0148693	DOWN	IGHG1
1560396_at	232.125	-1.01781	0.0148624	DOWN	KLHL6
214240_at	277.989	1.11293	0.0148325	UP	GAL
211798_x_at	6198.73	-1.12708	0.0148096	DOWN	IGLJ3
1566168_at	66.9795	-1.0204	0.0147612	DOWN	---
206760_s_at	19.8855	-1.27293	0.0146877	DOWN	FCER2
217281_x_at	5219.62	-1.15931	0.0145951	DOWN	IGH
205262_at	58.6764	1.3022	0.0145639	UP	KCNH2
230419_at	66.6732	1.40482	0.0145537	UP	SOX9-AS1
215702_s_at	540.149	1.12527	0.0145096	UP	CFTR
222511_x_at	113.657	1.10961	0.0145096	UP	FAF1
215049_x_at	1463.03	-1.05887	0.0144195	DOWN	CD163
233993_at	75.7459	-1.21396	0.0144195	DOWN	MUC3
1558930_at	84.4939	1.21123	0.0143863	UP	LINC00460
242786_at	76.4619	1.16559	0.0143226	UP	SBF2-AS1
221796_at	222.469	1.71216	0.014187	UP	NTRK2
210585_s_at	162.361	1.08404	0.0139818	UP	TNPO2
219971_at	103.005	-1.6116	0.0139656	DOWN	IL21R
219872_at	192.555	1.05662	0.0138206	UP	FAM198B
231226_at	36.376	-1.16402	0.0138206	DOWN	MED14OS
233181_at	47.8486	1.02511	0.0138206	UP	---
1555349_a_at	1551.56	-1.14145	0.0138111	DOWN	ITGB2
234469_at	25.5156	-1.20161	0.0137383	DOWN	OR51B4
205498_at	425.301	1.22339	0.0136315	UP	GHR
213008_at	376.088	1.20935	0.013579	UP	FANCI
214603_at	27.9828	1.98089	0.013579	UP	MAGEA2
216394_x_at	39.8152	-1.213	0.013579	DOWN	---
203645_s_at	1571.44	-1.0065	0.0135206	DOWN	CD163
1558299_at	89.9406	-1.53235	0.0133434	DOWN	---
206560_s_at	196.16	-1.10399	0.0133383	DOWN	MIA
214528_s_at	23.411	1.62718	0.013206	UP	PAX8
1555559_s_at	68.4493	1.33862	0.0131608	UP	USP25
239010_at	30.4075	1.62601	0.0131438	UP	DUXAP10
223757_at	433.516	1.13915	0.0130814	UP	DIO3OS
211663_x_at	890.682	-1.10533	0.0129845	DOWN	PTGDS
1566880_at	37.1651	-1.44939	0.0129635	DOWN	---
242009_at	32.9005	1.57445	0.0129109	UP	SLC6A4
238561_s_at	143.789	1.05157	0.0128246	UP	UTP23
206421_s_at	343.822	-2.49341	0.0127365	DOWN	SERPINB7
205767_at	595.748	1.85186	0.0126963	UP	EREG
229376_at	328.022	1.00489	0.0126688	UP	PROX1
227860_at	284.453	-1.15776	0.0125931	DOWN	CPXM1
220745_at	136.128	-1.02228	0.0125776	DOWN	IL19
234092_s_at	388.743	-1.021	0.0124875	DOWN	TM6SF2
243297_at	40.0573	-1.00073	0.0124426	DOWN	---
209699_x_at	1289	-1.07997	0.0124226	DOWN	AKR1C2
1558888_x_at	46.4912	1.19598	0.012401	UP	ZNF321P
232501_at	82.6218	1.01725	0.0123314	UP	RNF150
237130_at	36.9721	1.17496	0.012233	UP	---
239579_at	151.751	1.40351	0.0122013	UP	EPHX4
206296_x_at	257.976	-1.21595	0.0121439	DOWN	MAP4K1
217428_s_at	147.251	2.29317	0.0121439	UP	COL10A1
214460_at	17.8419	-1.31032	0.0120465	DOWN	LSAMP
219795_at	1975.14	-2.02321	0.0119503	DOWN	SLC6A14
222608_s_at	803.307	1.04912	0.0119292	UP	ANLN
39318_at	396.392	-1.77472	0.0118619	DOWN	TCL1A
201796_s_at	210.643	1.10151	0.0117367	UP	VARS
205400_at	139.839	-1.02592	0.0117356	DOWN	WAS
230570_at	251.413	1.27806	0.0117356	UP	EIF3H
207144_s_at	33.3716	1.21817	0.0116824	UP	CITED1
227702_at	284.077	1.47185	0.0116574	UP	CYP4X1
1556348_at	34.4586	1.10868	0.0115715	UP	HEATR1
205598_at	39.2229	1.34326	0.0115283	UP	TRAIP
222705_s_at	125.983	1.21579	0.0114709	UP	SLC25A15
220254_at	39.6234	1.40059	0.011461	UP	LRP12
219654_at	182.919	1.05741	0.0114164	UP	PTPLA
210146_x_at	375.614	-1.06014	0.0113784	DOWN	LILRB2
214846_s_at	79.6409	1.55776	0.0112984	UP	ALPK3
205113_at	61.1549	-1.09675	0.0112878	DOWN	NEFM
237958_at	146.824	-1.02016	0.0112155	DOWN	---
214612_x_at	77.6547	1.52473	0.0111608	UP	MAGEA6
239790_s_at	51.1249	1.54713	0.0110604	UP	---
226446_at	479.714	1.36176	0.0110316	UP	HES6
1558160_at	14.0018	-1.63038	0.0110284	DOWN	CCDC171
203854_at	1013.04	-1.09344	0.0109994	DOWN	CFI
1553781_at	17.5104	1.50902	0.0109895	UP	ZC3HAV1L
228671_at	216.584	1.36943	0.0107118	UP	TMEM201
230814_at	39.1747	-1.26158	0.0107118	DOWN	C19orf81
216244_at	19.5253	-1.61034	0.0106904	DOWN	IL1RN
227764_at	43.8581	1.55979	0.0106763	UP	LYPD6
243358_at	131.018	1.28038	0.0106483	UP	IGF1R
1554332_a_at	266.61	1.17702	0.0106334	UP	SLCO4A1-AS1
230877_at	131.795	-2.16271	0.0106187	DOWN	IGHD
1554413_s_at	25.2093	-1.65642	0.0105848	DOWN	SNX29P1
210521_s_at	14.1404	-1.35876	0.0105848	DOWN	FETUB
206529_x_at	91.732	-1.28656	0.0104542	DOWN	SLC26A4
221234_s_at	206.735	-1.2222	0.0104542	DOWN	BACH2
241860_at	91.8131	-1.15731	0.0104182	DOWN	---
234589_at	33.8139	1.22206	0.010398	UP	TMEM106A
1555515_a_at	61.8344	1.45477	0.0103373	UP	FAM189B
212671_s_at	4600.66	-1.01179	0.0101593	DOWN	HLA-DQA1
1566966_at	19.1333	-1.54226	0.0101356	DOWN	---
203687_at	95.0104	-1.37038	0.0100856	DOWN	CX3CL1
218484_at	275.217	1.39638	0.0100716	UP	NDUFA4L2
1564907_s_at	82.663	1.26669	0.0100005	UP	MATR3
241606_s_at	131.23	1.01796	0.00979284	UP	TRUB1
1569062_s_at	22.9975	1.47402	0.00972463	UP	IQGAP3
243765_at	65.7615	-1.01469	0.00970781	DOWN	---
231098_at	134.763	-1.14501	0.0096775	DOWN	---
204581_at	163.48	-1.91884	0.00965127	DOWN	CD22
1556194_a_at	125.435	1.09875	0.00962285	UP	HSPA4L
236768_at	12.42	-1.5587	0.00959514	DOWN	LINC01233
1563902_at	69.0159	-1.15969	0.00959468	DOWN	---
213068_at	321.986	-1.27119	0.00959127	DOWN	DPT
239257_at	41.3534	-1.00025	0.00951175	DOWN	MOV10L1
202977_s_at	37.5841	1.06683	0.00950677	UP	CREBZF
235447_at	78.9484	1.02925	0.00947804	UP	TRUB1
244610_x_at	84.0903	-1.02573	0.00936391	DOWN	---
221357_at	61.084	-1.38739	0.00933176	DOWN	CHRM4
206206_at	408.09	-1.1691	0.00931403	DOWN	CD180
208352_x_at	35.921	-1.40146	0.00929754	DOWN	ANK1
212187_x_at	2722.09	-1.27819	0.00929222	DOWN	PTGDS
203722_at	254.667	1.83269	0.00927117	UP	ALDH4A1
1560762_at	110.123	-1.0215	0.00924428	DOWN	LINC00996
1562511_at	64.0062	-1.23467	0.00919681	DOWN	LYST
241328_at	43.7404	-1.27224	0.00915306	DOWN	ZMAT1
1553219_a_at	155.806	1.19197	0.00906381	UP	AMMECR1
1554530_at	77.169	1.73107	0.00906098	UP	VSTM2A
205612_at	153.779	-1.0388	0.00906098	DOWN	MMRN1
206666_at	415.527	-1.12387	0.00906098	DOWN	GZMK
228758_at	287.405	-1.20618	0.00906098	DOWN	BCL6
214493_s_at	95.4446	1.00091	0.00897506	UP	INADL
205213_at	272.941	-1.54994	0.00895911	DOWN	ACAP1
215925_s_at	211.225	-1.33084	0.00895911	DOWN	CD72
206255_at	62.3257	-2.01556	0.00894436	DOWN	BLK
1553989_a_at	160.234	1.05208	0.00892577	UP	ATP6V1C2
204051_s_at	143.279	1.1888	0.00889928	UP	SFRP4
206570_s_at	59.9918	1.16732	0.00882411	UP	PSG11
236280_at	331.177	-1.27366	0.00881588	DOWN	---
217308_at	22.4816	-1.26172	0.00880361	DOWN	OR1F2P
209261_s_at	194.969	1.3933	0.00877427	UP	NR2F6
224468_s_at	847.481	1.00212	0.00871933	UP	C19orf48
235139_at	97.5982	-1.22107	0.00865403	DOWN	GNGT2
1554576_a_at	324.079	1.67463	0.00862464	UP	ETV4
219466_s_at	82.4454	1.68891	0.00858058	UP	APOA2
219969_at	97.9938	1.06245	0.00854783	UP	TXLNG
215427_s_at	72.1534	1.09686	0.00852057	UP	ZCCHC14
224342_x_at	4984.27	-1.18511	0.00851643	DOWN	BMS1P20
1553115_at	66.7453	1.22341	0.00848626	UP	NKD1
207237_at	70.6535	-1.37868	0.00847661	DOWN	KCNA3
237775_x_at	20.5992	1.06985	0.00847593	UP	---
240118_at	178.083	-1.16504	0.00841537	DOWN	---
207137_at	45.3562	1.14229	0.00840069	UP	TONSL
208209_s_at	858.607	-1.65568	0.00840012	DOWN	C4BPB
220139_at	14.4441	1.22092	0.00835699	UP	DNMT3L
223632_s_at	128.537	1.60109	0.00834671	UP	BC005081
226372_at	586.498	-1.03016	0.00830865	DOWN	CHST11
211708_s_at	388.79	2.15533	0.00820207	UP	SCD
229915_at	62.4542	-1.14358	0.00818225	DOWN	FAM26F
244526_at	38.83	-1.30306	0.00817234	DOWN	RASGRP3
244579_at	98.4985	-1.51335	0.00816505	DOWN	---
241682_at	284.368	1.08972	0.00811243	UP	KLHL23
224407_s_at	211.244	1.08877	0.00808789	UP	MST4
213071_at	192.495	-1.30702	0.00796726	DOWN	DPT
211122_s_at	577.952	-1.79384	0.0079349	DOWN	CXCL11
219519_s_at	211.429	-1.5494	0.0078515	DOWN	SIGLEC1
210327_s_at	94.2184	1.44647	0.00775957	UP	AGXT
228598_at	120.559	1.59312	0.00775239	UP	DPP10
1560963_a_at	26.0412	1.13377	0.00769031	UP	LOC100506379
211893_x_at	165.102	-1.37656	0.00767044	DOWN	CD6
240591_at	64.0106	-1.21166	0.00766963	DOWN	LOC102723645
211207_s_at	101.773	1.58607	0.0076588	UP	ACSL6
230543_at	130.094	1.49518	0.00765792	UP	---
231763_at	87.6188	1.24755	0.00761259	UP	POLR3A
1560128_x_at	189.247	-1.04739	0.00754277	DOWN	C5orf56
222928_s_at	52.8944	-1.30951	0.00754178	DOWN	FAM160B2
215102_at	21.4217	1.24417	0.00750922	UP	DPY19L1P1
217235_x_at	10779.3	-1.20636	0.00740013	DOWN	IGLL5
242571_at	197.216	1.03773	0.00739814	UP	REPS2
1561355_at	56.0194	-1.73642	0.00736289	DOWN	LOC692247
213094_at	929.564	-1.04867	0.00736289	DOWN	GPR126
218888_s_at	907.487	1.07815	0.00736289	UP	NETO2
235147_at	1012.72	1.02794	0.00736289	UP	---
215554_at	23.6782	-1.17924	0.00733112	DOWN	GPLD1
226974_at	1014.28	1.01763	0.00732392	UP	NEDD4L
231070_at	203.9	1.1594	0.0073215	UP	IYD
226498_at	332.42	1.0098	0.00727667	UP	FLT1
228828_at	93.0507	-1.22695	0.00722369	DOWN	BZRAP1-AS1
234764_x_at	8337.8	-1.30365	0.00721607	DOWN	CKAP2
235391_at	525.25	1.1321	0.00716399	UP	FAM92A1
241994_at	3369.9	-1.21972	0.00716399	DOWN	XDH
208744_x_at	1746.51	1.13971	0.00714255	UP	HSPH1
209591_s_at	313	1.57494	0.00710516	UP	BMP7
211906_s_at	114.269	-2.03388	0.00707409	DOWN	SERPINB4
222973_at	63.0144	1.0425	0.00707409	UP	---
236293_at	342.298	-1.32895	0.00705716	DOWN	RHOH
219753_at	246.382	-1.02797	0.00699572	DOWN	STAG3
209999_x_at	128.027	-1.70568	0.00699021	DOWN	SOCS1
211010_s_at	55.9525	-1.1757	0.00699021	DOWN	NCR3
238962_at	110.352	1.13092	0.00697526	UP	ZNF681
244840_x_at	74.2741	-1.57	0.00697178	DOWN	DOCK4
240397_x_at	24.0113	-1.17674	0.00696943	DOWN	---
206866_at	25.596	-1.25429	0.00696851	DOWN	CDH4
207979_s_at	225.959	-1.08655	0.00696851	DOWN	CD8B
234223_at	34.1297	-1.07535	0.00695195	DOWN	---
223820_at	281.754	-1.06354	0.00693779	DOWN	RBP5
215783_s_at	343.325	-1.035	0.00692211	DOWN	ALPL
219755_at	74.1047	1.37397	0.00691085	UP	CBX8
215721_at	31.2969	-1.37741	0.00676354	DOWN	IGHG1
202018_s_at	865.393	-2.99822	0.00668709	DOWN	LTF
202873_at	178.056	1.02398	0.00668656	UP	ATP6V1C1
230686_s_at	102.306	1.34175	0.00668656	UP	SLC13A3
220136_s_at	31.8146	1.98322	0.00668298	UP	CRYBA2
232224_at	287.57	-1.1598	0.00667943	DOWN	MASP1
1568719_s_at	76.7849	1.15033	0.0066578	UP	SLC22A23
241337_at	56.1763	-1.45425	0.0066578	DOWN	LOC101929465
1553888_at	49.5541	-1.42452	0.00664008	DOWN	LDHAL6A
228821_at	92.6713	1.78875	0.00664008	UP	ST6GAL2
216829_at	1091.25	-1.37762	0.00663608	DOWN	IGK
232339_at	42.6174	-1.04039	0.00663312	DOWN	DCAF8
1554804_a_at	212.384	1.06284	0.00656605	UP	CLDN19
211881_x_at	5500.62	-1.29356	0.00656605	DOWN	IGLJ3
244111_at	20.4775	-1.53459	0.00656605	DOWN	KRT222
213964_x_at	45.0852	1.16715	0.00653047	UP	RPARP-AS1
234884_x_at	2258.2	-1.05917	0.00653047	DOWN	CKAP2
242280_x_at	163.904	-1.03666	0.00647223	DOWN	CPEB4
1563674_at	330.821	-1.02403	0.006464	DOWN	FCRL2
206214_at	1186.88	-1.16705	0.00645941	DOWN	PLA2G7
222946_s_at	55.0461	1.56001	0.00640372	UP	AUNIP
233250_x_at	45.2519	1.2065	0.00638064	UP	FOXRED2
239381_at	434.966	-1.47724	0.00638064	DOWN	KLK7
206146_s_at	41.4631	-1.04541	0.00632063	DOWN	RHAG
1553890_s_at	73.879	-1.04125	0.00628684	DOWN	NTN5
244032_at	198.839	1.16518	0.00621911	UP	RP11-33O4.1
215145_s_at	78.4864	1.79212	0.00621181	UP	CNTNAP2
217180_at	88.4841	-1.27893	0.00620039	DOWN	---
1569188_s_at	83.8483	1.12314	0.0061982	UP	---
209792_s_at	1117.71	-2.98515	0.00614439	DOWN	KLK10
204033_at	704.148	1.034	0.00602124	UP	TRIP13
237625_s_at	620.648	-1.21971	0.0060198	DOWN	---
37145_at	431.861	-1.38821	0.00598854	DOWN	GNLY
207194_s_at	63.5889	-1.02364	0.00590269	DOWN	ICAM4
242222_at	59.6455	1.35939	0.00587824	UP	LINC01106
1552596_at	116.891	-1.23465	0.00584505	DOWN	GAS2L2
220017_x_at	451.526	-1.23733	0.00580458	DOWN	CYP2C9
204789_at	353.273	-1.13981	0.00580043	DOWN	FMNL1
214336_s_at	385.747	1.07505	0.00578261	UP	COPA
241772_at	21.5474	-1.50072	0.005745	DOWN	---
230966_at	198.338	-1.55248	0.00574178	DOWN	IL4I1
244061_at	105.725	-1.23994	0.00571373	DOWN	---
242200_at	67.3575	1.03278	0.00570882	UP	ADAMTSL5
1569700_s_at	94.1055	-1.38257	0.00567579	DOWN	AK7
214768_x_at	14833.4	-1.22349	0.00564134	DOWN	IGKC
1552280_at	165.932	-1.28913	0.00560979	DOWN	TIMD4
204702_s_at	862.834	1.05866	0.00560979	UP	NFE2L3
206997_s_at	93.295	1.09043	0.0056011	UP	HS6ST1
236340_at	82.1459	1.62977	0.00556935	UP	C7orf13
214049_x_at	335.085	-1.07799	0.00550515	DOWN	CD7
226167_at	69.4543	1.70184	0.0054693	UP	SYT7
204320_at	190.56	1.54778	0.00545693	UP	COL11A1
224403_at	41.4673	-1.63679	0.00545198	DOWN	FCRL4
1555716_a_at	392.512	1.01604	0.00544603	UP	CXADR
209504_s_at	685.1	1.26441	0.00541503	UP	PLEKHB1
241842_x_at	74.917	1.26981	0.00529125	UP	C19orf45
222144_at	29.5964	-1.20053	0.00520923	DOWN	KIF17
208126_s_at	587.901	-1.26193	0.00514659	DOWN	CYP2C18
1559361_at	162.288	1.1364	0.005051	UP	LOC101927668
210301_at	1144.07	-1.09366	0.005051	DOWN	XDH
214727_at	211.851	1.14325	0.0050258	UP	BRCA2
1553972_a_at	485.573	1.00991	0.00500022	UP	CBS
203626_s_at	186.985	1.35688	0.00491474	UP	SKP2
217179_x_at	6201.51	-1.20265	0.0048946	DOWN	---
240777_at	48.7459	-1.57793	0.00488901	DOWN	SYNE2
230582_at	20.1665	-1.06333	0.00487807	DOWN	HECA
202376_at	1948.95	-2.06926	0.0048746	DOWN	SERPINA3
232313_at	27.4619	-1.17085	0.0048746	DOWN	TMEM132C
221755_at	378.506	-1.03754	0.00483947	DOWN	EHBP1L1
239653_at	142.365	1.21804	0.00480275	UP	---
217148_x_at	16897.5	-1.04922	0.00479527	DOWN	IGLC1
209567_at	1000.32	1.0299	0.00471363	UP	RRS1
241122_s_at	12.5977	-1.18656	0.00464739	DOWN	MUSK
210116_at	173.616	-1.10857	0.00462837	DOWN	SH2D1A
205237_at	489.548	-1.39493	0.00461316	DOWN	FCN1
230955_s_at	65.7432	1.25575	0.00458423	UP	NOL4L
220432_s_at	189.174	1.01322	0.00458407	UP	CYP39A1
228262_at	118.026	1.85046	0.00458349	UP	MAP7D2
212563_at	761.676	1.05491	0.00456871	UP	BOP1
37953_s_at	105.625	1.16134	0.00455844	UP	ASIC1
209603_at	39.1501	-1.3411	0.004543	DOWN	GATA3
210279_at	392.912	-1.44973	0.004543	DOWN	GPR18
208555_x_at	225.071	1.06263	0.00452118	UP	CST2
234992_x_at	234.969	1.10961	0.00450715	UP	ECT2
221003_s_at	39.7302	1.40335	0.00450238	UP	CAB39L
1566764_at	193.104	1.37176	0.00446004	UP	MACC1
227218_at	83.5436	-1.19445	0.0044365	DOWN	RLTPR
212827_at	1403.16	-1.79433	0.0044116	DOWN	IGHM
219000_s_at	393.586	1.02165	0.00440683	UP	DSCC1
65588_at	472.583	1.2058	0.00438865	UP	SNHG17
209720_s_at	222.352	-2.68929	0.00431809	DOWN	SERPINB3
1562492_at	27.7593	1.57182	0.00431554	UP	LOC340090
220049_s_at	16.6071	-1.12305	0.0043068	DOWN	PDCD1LG2
217070_at	40.9915	1.56251	0.00430521	UP	MTHFR
223055_s_at	330.27	1.34756	0.00428453	UP	XPO5
1556429_a_at	33.9072	1.96619	0.00428333	UP	TBC1D31
224221_s_at	435.12	1.24055	0.00427912	UP	VAV3
241661_at	79.5623	1.28884	0.0042684	UP	JMJD1C
1557014_a_at	76.8959	1.31204	0.00420191	UP	FAM201A
205495_s_at	373.789	-1.58329	0.00419809	DOWN	GNLY
243917_at	105.242	-2.15742	0.00418086	DOWN	CLIC5
1555935_s_at	363.615	1.2557	0.00407768	UP	HUNK
239589_at	26.9492	1.56159	0.00407768	UP	---
230896_at	89.089	-1.55392	0.00405487	DOWN	BEND4
237027_at	44.2454	-1.08711	0.00400389	DOWN	LSAMP-AS1
230925_at	1143.81	-1.00334	0.00399597	DOWN	APBB1IP
228153_at	693.118	-1.06751	0.00393452	DOWN	RNF144B
230944_at	185.088	1.36457	0.00392998	UP	C6orf223
219550_at	114.231	-1.54094	0.00386489	DOWN	ROBO3
235988_at	58.3678	-1.76241	0.00386489	DOWN	GPR110
227030_at	526.36	-1.58982	0.00385338	DOWN	IKZF3
240555_at	33.5389	-1.12473	0.00384864	DOWN	---
1554768_a_at	951.596	1.1871	0.0038411	UP	MAD2L1
231362_at	21.8085	-1.23426	0.00383705	DOWN	---
1555220_a_at	16.0991	1.3066	0.0038046	UP	AKR1E2
241902_at	15.489	1.88467	0.00379993	UP	MKX
220625_s_at	88.4652	2.02853	0.00378486	UP	ELF5
206093_x_at	406.408	-1.15979	0.00377079	DOWN	TNXA
1553296_at	730.638	-1.56995	0.00371979	DOWN	GPR128
221288_at	15.5452	1.6138	0.00371979	UP	GPR22
230015_at	102.987	-1.07583	0.00371979	DOWN	PRCD
244313_at	381.529	-1.30425	0.00371979	DOWN	CR1
222281_s_at	117.18	-1.45659	0.0036598	DOWN	C1orf186
232479_at	43.7546	1.36257	0.00363075	UP	FERMT1
203444_s_at	80.8877	1.53457	0.00357989	UP	MTA2
205653_at	307.633	-1.25006	0.00357989	DOWN	CTSG
228581_at	57.2856	-1.47984	0.00357989	DOWN	KCNJ10
234730_s_at	82.0601	1.49374	0.00357989	UP	RIPK4
231093_at	428.911	-1.47154	0.003541	DOWN	FCRL3
228055_at	617.448	-1.1676	0.00353769	DOWN	NAPSB
205941_s_at	100.668	1.93174	0.00350711	UP	COL10A1
224460_s_at	187.604	1.01021	0.00350711	UP	L2HGDH
203878_s_at	472.828	1.16818	0.0034772	UP	MMP11
1562691_at	42.9624	-1.29663	0.00345459	DOWN	FGF10-AS1
215439_x_at	132.107	-1.03153	0.00344159	DOWN	---
1569040_s_at	382.076	-1.32985	0.00339862	DOWN	ANKRD36BP2
222285_at	91.9773	-2.04472	0.00339283	DOWN	IGHD
224525_s_at	80.4143	1.03841	0.00337374	UP	OLA1
1565082_x_at	128.152	1.25967	0.00334814	UP	SRC
214725_at	59.5765	2.10626	0.00332486	UP	SBSPON
232990_at	62.369	1.14381	0.0033126	UP	FAM104B
208608_s_at	141.557	1.55048	0.00330142	UP	SNTB1
205543_at	162.906	1.17286	0.00327375	UP	HSPA4L
1560397_s_at	211.954	-1.54537	0.00327202	DOWN	KLHL6
231200_at	128.086	1.42477	0.00321559	UP	LSM14B
216430_x_at	868.313	-1.29525	0.00321332	DOWN	IGLV1-44
230980_x_at	40.3929	-1.63902	0.00321332	DOWN	MIR142
210915_x_at	2281.07	-1.13125	0.00320109	DOWN	TRBC1
205321_at	1243.99	1.29368	0.00319836	UP	EIF2S3
237798_at	41.5095	-1.04894	0.00319412	DOWN	---
241605_at	35.5224	-1.24842	0.00318675	DOWN	TRUB1
216129_at	222.939	1.04351	0.00315761	UP	ATP9A
213537_at	935.387	-1.16164	0.00311429	DOWN	HLA-DPA1
236307_at	103.698	-1.56688	0.00309934	DOWN	---
209723_at	1288.55	-1.15055	0.00308437	DOWN	SERPINB9
210244_at	55.1439	-1.08166	0.00308231	DOWN	CAMP
214450_at	76.0313	-1.79411	0.00303662	DOWN	CTSW
220320_at	90.0506	-1.39643	0.00301966	DOWN	DOK3
201195_s_at	1299.15	1.4889	0.00298722	UP	SLC7A5
204953_at	23.4138	-1.35373	0.00298722	DOWN	SNAP91
230514_s_at	60.9283	1.30531	0.00297212	UP	LYZL1
217601_at	39.6192	1.26298	0.00292027	UP	NUP188
206150_at	1256.89	-1.03637	0.00290622	DOWN	CD27
1559079_at	51.3196	-1.21006	0.00289406	DOWN	LINC00567
214511_x_at	421.097	-1.25889	0.00289336	DOWN	FCGR1B
210557_x_at	130.705	1.22512	0.00289105	UP	CSF1
205484_at	257.347	-1.62451	0.00287093	DOWN	SIT1
212282_at	1764.42	1.08051	0.00283127	UP	TMEM97
223963_s_at	96.2978	1.00775	0.00283127	UP	IGF2BP2
238526_at	129.911	1.4757	0.00279807	UP	RAB3IP
221638_s_at	272.969	1.06324	0.00278505	UP	STX16
1562414_at	31.4246	1.4345	0.00273737	UP	LOC100509814
210163_at	488.571	-2.09222	0.0027333	DOWN	CXCL11
211796_s_at	1840.98	-1.0867	0.00267178	DOWN	TRBC1
227552_at	267.147	-1.03729	0.00264543	DOWN	2019-09-01
229450_at	1617.21	-1.11578	0.00264543	DOWN	IFIT3
1569566_at	77.6696	-1.04265	0.00264091	DOWN	TBC1D1
204675_at	842.264	1.1408	0.00263891	UP	SRD5A1
212797_at	388.668	1.06879	0.0026321	UP	SORT1
237992_at	41.1851	2.0089	0.00260351	UP	---
205844_at	1002.65	-1.81447	0.00259431	DOWN	VNN1
235026_at	184.865	1.10585	0.00257846	UP	C12orf66
224210_s_at	198.614	1.01079	0.00255035	UP	PXMP4
241742_at	23.6005	-1.67174	0.00254285	DOWN	PRAM1
237069_s_at	20.9032	-1.55212	0.00253925	DOWN	TRPM1
203876_s_at	106.096	1.73906	0.00253112	UP	MMP11
243780_at	531.426	-1.55776	0.00253112	DOWN	CTA-250D10.23
229725_at	155.005	1.81566	0.00250868	UP	ACSL6
210052_s_at	1724.33	1.15111	0.00250176	UP	TPX2
221981_s_at	29.9113	1.39598	0.00242639	UP	WDR59
238655_at	115.677	1.11475	0.00240162	UP	ACAD10
206804_at	337.765	-1.18635	0.00238704	DOWN	CD3G
205863_at	964.708	-2.25066	0.00236631	DOWN	S100A12
214939_x_at	140.632	1.52785	0.00236192	UP	MLLT4
232607_at	32.9621	-1.57838	0.00236192	DOWN	---
216549_s_at	63.8483	1.36217	0.00233865	UP	TBC1D22B
238959_at	183.792	1.19098	0.00232866	UP	LARP4
201111_at	1125.07	1.17497	0.00232023	UP	CSE1L
204192_at	839.363	-1.55233	0.00229545	DOWN	CD37
204653_at	145.9	1.30111	0.00229545	UP	TFAP2A
227952_at	138.879	-1.77012	0.00227281	DOWN	ZNF595
205504_at	374.605	-1.23662	0.00226533	DOWN	BTK
1554899_s_at	1898.07	-1.11633	0.00224417	DOWN	FCER1G
220548_at	32.9867	-1.58416	0.00223076	DOWN	PKDREJ
219947_at	487.868	-1.01559	0.00222361	DOWN	CLEC4A
214443_at	161.767	1.03625	0.00218869	UP	PVR
239911_at	86.1364	1.34406	0.00216359	UP	ONECUT2
208392_x_at	301.249	-1.15636	0.00212757	DOWN	SP110
235385_at	198.938	-1.14767	0.00212324	DOWN	2019-03-01
204385_at	586.114	-1.23217	0.00211813	DOWN	KYNU
218600_at	210.447	-1.09176	0.00211404	DOWN	LIMD2
226471_at	91.3187	1.26545	0.00204738	UP	GGT7
220639_at	552.194	-1.9088	0.00202729	DOWN	TM4SF20
205932_s_at	215.045	1.14605	0.00201961	UP	MSX1
1552623_at	261.089	-1.02525	0.00200013	DOWN	HSH2D
217251_x_at	46.067	-1.53288	0.00199055	DOWN	---
223553_s_at	955.51	-1.14618	0.00196811	DOWN	DOK3
204232_at	3365.83	-1.022	0.00195855	DOWN	FCER1G
240232_at	145.797	-1.50901	0.00195089	DOWN	---
244829_at	42.0633	-1.38071	0.00194423	DOWN	LINC00518
217133_x_at	109.607	1.18846	0.00193757	UP	CYP2B6
217469_at	58.6538	-1.41733	0.00189469	DOWN	IGH
1554803_s_at	62.5921	1.34592	0.00188516	UP	TRIM72
202803_s_at	2894.71	-1.15594	0.00186791	DOWN	ITGB2
229041_s_at	338.872	-1.58625	0.00186791	DOWN	ITGB2-AS1
1554101_a_at	162.476	1.04446	0.00184669	UP	TMTC4
1554452_a_at	750.31	1.20874	0.00184669	UP	HILPDA
205903_s_at	126.533	-1.84433	0.00184669	DOWN	KCNN3
216212_s_at	852.435	1.0851	0.00184669	UP	DKC1
227344_at	463.825	-1.10492	0.00184669	DOWN	IKZF1
230964_at	64.7401	1.65827	0.00183108	UP	FREM2
210765_at	81.2227	1.32429	0.00180357	UP	CSE1L
212750_at	517.242	-1.18156	0.00180357	DOWN	PPP1R16B
219463_at	128.706	-1.4472	0.00180357	DOWN	LAMP5
201416_at	716.484	1.15126	0.00179583	UP	SOX4
219555_s_at	468.648	1.35248	0.00179419	UP	CENPN
215777_at	790.413	-1.41652	0.00178664	DOWN	IGLV4-60
226869_at	48.4392	1.67355	0.00178473	UP	MEGF6
238365_s_at	64.9138	-1.9584	0.00177253	DOWN	C1orf228
206278_at	169.412	-1.02686	0.00176625	DOWN	PTAFR
202510_s_at	1611.5	-1.14741	0.0017649	DOWN	TNFAIP2
225578_at	1302.17	1.09835	0.00176362	UP	MZT1
222267_at	141.762	1.20749	0.00175622	UP	TMEM209
206380_s_at	113.581	-2.01525	0.00174475	DOWN	CFP
229441_at	140.198	1.4305	0.00174475	UP	PRSS23
230866_at	252.32	-1.09557	0.00174475	DOWN	CYSLTR1
1568638_a_at	128.869	-1.30957	0.00173705	DOWN	IDO2
231181_at	98.6424	-1.10996	0.00173049	DOWN	---
211712_s_at	47.3263	1.75979	0.00172979	UP	ANXA9
206638_at	26.0603	-1.78851	0.00171783	DOWN	HTR2B
232792_at	71.9042	-1.47432	0.00170583	DOWN	TRIM69
210766_s_at	1837.84	1.07275	0.00168992	UP	CSE1L
229560_at	569.801	-1.23013	0.00167999	DOWN	TLR8
213562_s_at	356.47	1.20267	0.00166633	UP	SQLE
205361_s_at	1597.22	1.06053	0.00165619	UP	PFDN4
210413_x_at	327.256	-1.40873	0.00165619	DOWN	SERPINB3
201107_s_at	42.2801	1.7269	0.00165195	UP	THBS1
228532_at	480.706	-1.12822	0.00165002	DOWN	C1orf162
243752_s_at	25.7144	1.90875	0.00164244	UP	CYTH3
210663_s_at	564.409	-1.50157	0.0016077	DOWN	KYNU
230897_at	89.6218	-1.13869	0.00159372	DOWN	CCDC30
1563069_at	24.6956	-1.51936	0.00159205	DOWN	AP001605.4
205153_s_at	457.661	-1.02074	0.00159176	DOWN	CD40
224451_x_at	1192.82	-1.09436	0.00158417	DOWN	ARHGAP9
1556814_a_at	55.2824	-1.47386	0.00157967	DOWN	CTA-292E10.6
223744_s_at	541.101	1.57049	0.00156489	UP	SIAE
210262_at	27.6985	-1.9041	0.00156135	DOWN	CRISP2
217231_s_at	23.0468	-1.42414	0.00156135	DOWN	MAST1
220005_at	462.022	-1.25053	0.00153641	DOWN	P2RY13
205868_s_at	56.5502	1.87824	0.00149061	UP	PTPN11
208602_x_at	84.8091	-1.78031	0.00148553	DOWN	CD6
237033_at	55.3404	-1.6777	0.00147374	DOWN	FAM159A
210103_s_at	510.551	1.45564	0.00146858	UP	FOXA2
210321_at	197.757	-1.18863	0.00144934	DOWN	GZMH
210991_s_at	244.028	-1.19613	0.00144934	DOWN	RIMS3
235845_at	168.051	1.58064	0.00144934	UP	SP5
211162_x_at	298.915	2.21632	0.00144547	UP	SCD
235735_at	158.774	-1.37857	0.00143942	DOWN	TNFSF8
209434_s_at	401.694	1.02001	0.0014268	UP	PPAT
216365_x_at	1408.68	-1.59387	0.00142396	DOWN	CKAP2
207892_at	104.012	-1.40311	0.00141869	DOWN	CD40LG
237056_at	290.276	-1.30694	0.00141869	DOWN	INSC
227210_at	262.886	-1.07949	0.00141329	DOWN	SFMBT2
243811_at	46.7519	-1.35557	0.00141329	DOWN	HOXB1
209670_at	1217.83	-1.03611	0.00139853	DOWN	TRAC
207982_at	72.0906	-1.37189	0.00137996	DOWN	HIST1H1T
212105_s_at	213.675	1.02996	0.0013728	UP	DHX9
226473_at	156.577	1.8068	0.00136783	UP	CBX2
1552740_at	41.0938	1.98628	0.00136462	UP	C2orf15
220633_s_at	169.6	1.75692	0.001354	UP	HP1BP3
210132_at	385.173	1.27052	0.0013485	UP	EFNA3
205569_at	906.226	-1.48442	0.00132629	DOWN	LAMP3
1557733_a_at	69.5398	-1.07414	0.00131498	DOWN	CHRM3-AS2
211138_s_at	268.84	-1.00325	0.00131498	DOWN	KMO
224406_s_at	505.054	-1.32017	0.00131498	DOWN	FCRL5
228518_at	448.363	-1.70323	0.00131498	DOWN	IGHG1
211603_s_at	258.841	1.66796	0.00129367	UP	ETV4
204446_s_at	1251.89	-1.00368	0.00129089	DOWN	ALOX5
210001_s_at	728.591	-1.25884	0.00129089	DOWN	SOCS1
1554242_a_at	86.006	1.97374	0.0012842	UP	COCH
210727_at	88.1542	1.53965	0.0012606	UP	CALCA
206952_at	20.8437	-2.98393	0.00125165	DOWN	G6PC
206478_at	460.98	-1.09979	0.00124528	DOWN	KIAA0125
236351_at	233.535	1.4995	0.00118782	UP	DPP10-AS1
205297_s_at	386.99	-1.37154	0.00117504	DOWN	CD79B
1557260_a_at	25.633	-1.79343	0.00117205	DOWN	ZNF382
213683_at	85.4658	1.64842	0.0011499	UP	ACSL6
217552_x_at	170.174	-1.34343	0.00114817	DOWN	CR1
221581_s_at	550.668	-1.29898	0.00113367	DOWN	LAT2
217145_at	419.007	-1.48152	0.00112548	DOWN	IGK
210932_s_at	98.477	1.08219	0.00112195	UP	RNF6
204960_at	634.621	-1.51591	0.00111162	DOWN	PTPRCAP
232596_at	61.657	1.96783	0.00111113	UP	DIAPH3
203304_at	733.226	1.07942	0.00109443	UP	BAMBI
230975_at	35.1824	-1.29044	0.00109157	DOWN	RP11-109E10.1
205278_at	30.9786	2.2323	0.00108697	UP	GAD1
230276_at	170.916	-1.07155	0.0010757	DOWN	FAM49A
211795_s_at	790.405	-1.00505	0.00107408	DOWN	FYB
229625_at	370.94	-1.25929	0.00106362	DOWN	GBP5
204720_s_at	133.63	1.23292	0.00104268	UP	DNAJC6
237205_at	17.3166	2.3104	0.00102409	UP	LINC00238
217595_at	198.396	1.00186	0.00100363	UP	GSPT1
221133_s_at	44.3281	-2.19049	0.00100363	DOWN	CLDN18
203760_s_at	1065.17	-1.1489	0.00099465	DOWN	SLA
209719_x_at	432.839	-1.69425	0.000973806	DOWN	SERPINB3
219452_at	53.1207	-2.00119	0.000967085	DOWN	DPEP2
229686_at	489.776	-1.43364	0.000963603	DOWN	P2RY8
203761_at	1229.5	-1.01838	0.000940671	DOWN	SLA
213793_s_at	319.579	1.0988	0.000936986	UP	HOMER1
210393_at	273.139	1.90363	0.000917964	UP	LGR5
216283_s_at	111.514	1.46415	0.000917964	UP	PVR
211658_at	1548.34	1.13586	0.000914295	UP	PRDX2
220819_at	160.945	1.28126	0.00090209	UP	FRMD1
205267_at	2576.75	-1.32623	0.000897806	DOWN	LOC101928620
205049_s_at	1290.66	-1.53343	0.000894478	DOWN	CD79A
223663_at	510.399	-1.03984	0.000889897	DOWN	CCDC88B
227346_at	911.416	-1.21134	0.000881264	DOWN	IKZF1
234366_x_at	5038.77	-1.68434	0.000877389	DOWN	CKAP2
228362_s_at	83.6807	-1.82334	0.000871065	DOWN	FAM26F
242520_s_at	10.744	-2.10632	0.000865746	DOWN	C1orf228
201397_at	637.481	1.50335	0.000861552	UP	PHGDH
221122_at	519.745	-1.38421	0.00085766	DOWN	HRASLS2
210567_s_at	233.83	1.24235	0.000856433	UP	SKP2
1554339_a_at	231.195	1.08746	0.000830005	UP	COG3
1555779_a_at	1632.17	-1.33099	0.000829228	DOWN	CD79A
202954_at	2437.53	1.30467	0.000829228	UP	UBE2C
241068_at	130.037	-1.2193	0.000826451	DOWN	IGSF6
218223_s_at	534.492	-1.25341	0.000817419	DOWN	PLEKHO1
229597_s_at	347.203	-1.28509	0.000791554	DOWN	WDFY4
1553765_a_at	27.2726	1.91279	0.000790417	UP	KLHL32
228045_at	425.866	1.01933	0.000775996	UP	SUGT1
223640_at	541.767	-1.00641	0.000769721	DOWN	HCST
1561367_a_at	149.285	1.86552	0.000766874	UP	LINC00540
201116_s_at	671.937	1.34011	0.000760167	UP	CPE
208451_s_at	1568.17	-1.20569	0.000753337	DOWN	C4A
216224_s_at	50.6244	1.47379	0.000753337	UP	HDAC6
211527_x_at	660.719	1.25249	0.000752478	UP	VEGFA
206486_at	233.492	-1.21529	0.000738837	DOWN	LAG3
1553812_at	31.0943	-1.39413	0.00071827	DOWN	TLE6
201801_s_at	667.454	1.61638	0.000717851	UP	SLC29A1
208607_s_at	300.422	-2.17502	0.000713539	DOWN	SAA1
205867_at	74.3072	1.55054	0.000711052	UP	PTPN11
235749_at	207.309	1.22976	0.000705099	UP	UGGT2
204127_at	1374.54	1.24955	0.000694532	UP	RFC3
238581_at	285.165	-1.5366	0.000694327	DOWN	GBP5
205590_at	513.479	-1.12738	0.00068424	DOWN	RASGRP1
240045_at	178.961	2.29844	0.000682058	UP	---
242020_s_at	227.889	-1.30415	0.000674921	DOWN	ZBP1
214135_at	408.698	-1.76327	0.000666727	DOWN	CLDN18
219878_s_at	352.459	-1.02284	0.000664237	DOWN	KLF13
228171_s_at	394.266	1.04465	0.000664237	UP	PLEKHG4
222890_at	138.33	1.38203	0.000661852	UP	CCDC113
201478_s_at	2156.14	1.0362	0.000652307	UP	DKC1
221777_at	485.778	1.09173	0.000650553	UP	RITA1
237215_s_at	533.313	1.64108	0.000649406	UP	TFRC
241006_at	56.2435	-1.3796	0.000643831	DOWN	---
208037_s_at	945.246	-1.28681	0.00063888	DOWN	MADCAM1
227174_at	356.783	2.1986	0.000630974	UP	WDR72
221539_at	1368.95	1.05811	0.000625518	UP	EIF4EBP1
224499_s_at	88.2376	-2.24706	0.000606344	DOWN	AICDA
206398_s_at	533.099	-1.53997	0.000604879	DOWN	CD19
203879_at	782.84	-1.2366	0.000604809	DOWN	PIK3CD
219424_at	158.747	-1.49221	0.000603054	DOWN	EBI3
201117_s_at	894.549	1.35877	0.000598507	UP	CPE
214032_at	240.862	-1.22702	0.000589046	DOWN	ZAP70
243810_at	82.9917	-1.26412	0.000585386	DOWN	---
228691_at	103.875	-1.52121	0.000583998	DOWN	RP11-843B15.2
230917_at	216.505	-1.38953	0.000564365	DOWN	PLCG2
1555867_at	144.66	1.97021	0.000556702	UP	GNG4
205671_s_at	396.801	-1.86292	0.000556702	DOWN	HLA-DOB
213880_at	751.729	2.26166	0.000556702	UP	LGR5
217227_x_at	5676.77	-1.56264	0.000556702	DOWN	IGLV1-44
224404_s_at	494.542	-1.55898	0.000556702	DOWN	FCRL5
223303_at	651.847	-1.06396	0.000539593	DOWN	FERMT3
218232_at	4951.04	-1.1638	0.000534881	DOWN	C1QA
209823_x_at	2521.3	-1.37905	0.000531902	DOWN	HLA-DQB1
232675_s_at	362.114	1.01688	0.000531902	UP	UCKL1
1566141_at	32.8115	-1.59284	0.000522339	DOWN	---
228977_at	763.851	1.16751	0.0005189	UP	LOC729680
225402_at	852.423	1.22642	0.000515184	UP	TP53RK
213915_at	541.88	-1.44342	0.000513843	DOWN	NKG7
240624_x_at	35.6737	-1.75437	0.000513172	DOWN	RP1-170O19.17
232252_at	247.196	1.94174	0.000507752	UP	DUSP27
1553113_s_at	804.753	1.00706	0.000505937	UP	CDK8
1554679_a_at	1923.31	1.24692	0.000503838	UP	LAPTM4B
219364_at	29.1512	-1.59216	0.000499262	DOWN	DHX58
213475_s_at	424.145	-1.07402	0.000495681	DOWN	ITGAL
217176_s_at	107.471	1.02597	0.00049487	UP	ZFX
206582_s_at	427.195	1.43733	0.000470179	UP	GPR56
220789_s_at	674.629	1.15946	0.000469236	UP	SNORA5B
204606_at	793.472	-1.80486	0.000467215	DOWN	CCL21
242546_at	107.883	1.44821	0.00046686	UP	DUXAP10
211868_x_at	4990.28	-1.67598	0.000464781	DOWN	IGH
236235_at	295.66	1.19536	0.000464188	UP	ITCH
205673_s_at	216.639	1.20331	0.000460745	UP	ASB9
219328_at	79.4243	1.49973	0.00045946	UP	DDX31
223562_at	532.14	-1.1867	0.00045946	DOWN	PARVG
223565_at	1689.71	-1.59394	0.00045946	DOWN	MZB1
228258_at	489.387	-1.25762	0.00045946	DOWN	TBC1D10C
207412_x_at	134.476	2.75624	0.000429828	UP	CELP
201112_s_at	3413.39	1.10932	0.000425853	UP	CSE1L
205719_s_at	83.2622	2.33113	0.000421678	UP	LOC101929036
213888_s_at	466.083	-1.25188	0.000406436	DOWN	TRAF3IP3
212349_at	394.504	1.01909	0.00039795	UP	POFUT1
1554685_a_at	95.931	2.231	0.000390463	UP	CEMIP
221969_at	385.498	-1.7269	0.000390463	DOWN	PAX5
226438_at	610.761	1.01102	0.000390463	UP	SNTB1
221577_x_at	1599.92	1.97893	0.000380772	UP	GDF15
214181_x_at	677.013	-1.03545	0.000374583	DOWN	LST1
220418_at	37.2169	-1.91912	0.000369244	DOWN	UBASH3A
229715_at	503.786	1.24235	0.000365764	UP	NCR3LG1
229437_at	199.935	-1.26996	0.000355481	DOWN	MIR155
236191_at	194.179	-1.58099	0.000355481	DOWN	---
215014_at	215.513	-1.33722	0.000351374	DOWN	KCND3
202953_at	2916	-1.18836	0.000349577	DOWN	C1QB
206420_at	650.072	-1.1151	0.000349577	DOWN	IGSF6
207339_s_at	782.916	-1.34427	0.000347895	DOWN	LTB
226459_at	1351.3	-1.07656	0.000346259	DOWN	PIK3AP1
235903_at	38.6143	1.59228	0.000340932	UP	ANKS6
235210_s_at	389.252	1.88882	0.000340312	UP	SBSPON
227153_at	402.717	1.05367	0.000327506	UP	IMMP2L
1553079_at	201.133	-1.97935	0.000316296	DOWN	TRIM40
200903_s_at	3220.74	1.0882	0.000300596	UP	AHCY
226219_at	893.664	-1.16573	0.000300596	DOWN	ARHGAP30
216517_at	497.068	-1.28122	0.00029861	DOWN	IGKC
222695_s_at	136.508	1.78908	0.00029861	UP	AXIN2
226435_at	448.214	-1.1798	0.000293709	DOWN	PAPLN
243969_at	25.6355	-1.55332	0.000292129	DOWN	SLC24A4
213832_at	555.891	-1.26991	0.000282967	DOWN	KCND3
242881_x_at	166.048	1.87038	0.000280778	UP	BC017398
210442_at	101.877	-1.35729	0.000279756	DOWN	IL1RL1
231647_s_at	300.742	-1.44741	0.000278011	DOWN	FCRL5
235209_at	284.39	2.34962	0.000278011	UP	SBSPON
205194_at	409.664	1.29091	0.000268463	UP	PSPH
214219_x_at	153.653	-2.13086	0.000259927	DOWN	MAP4K1
235816_s_at	60.79	-1.85226	0.000259927	DOWN	RGL4
215035_at	102.72	-2.07338	0.000256806	DOWN	IGLV6-57
223503_at	260.688	-1.54358	0.000254279	DOWN	TMEM163
205901_at	343.701	-1.01822	0.000253129	DOWN	PNOC
203923_s_at	1069.48	-1.28346	0.000251766	DOWN	CYBB
209683_at	246.907	-1.30229	0.000251766	DOWN	FAM49A
208335_s_at	634.626	-1.8038	0.000249018	DOWN	ACKR1
239246_at	378.289	1.01507	0.000239343	UP	FARP1
210100_s_at	128.872	1.67665	0.00023656	UP	ABCA2
37892_at	176.952	2.56384	0.000226022	UP	COL11A1
222760_at	1780.95	1.11854	0.000222437	UP	ZNF703
205422_s_at	25.8324	2.40425	0.000218384	UP	ITGBL1
1557910_at	6386.06	1.13249	0.000217931	UP	HSP90AB1
214708_at	121.961	1.86999	0.000217931	UP	SNTB1
215465_at	70.1657	-2.1149	0.000210125	DOWN	ABCA12
229121_at	309.327	-1.76916	0.000210125	DOWN	CMKLR1
229721_x_at	1825.83	-1.24059	0.000208109	DOWN	DERL3
224857_s_at	885.665	1.06756	0.000207497	UP	POLR1D
209055_s_at	582.491	1.02157	0.000206142	UP	CDC5L
234306_s_at	392.749	-1.32588	0.000205185	DOWN	SLAMF7
223062_s_at	1418.11	1.74621	0.000199355	UP	PSAT1
209685_s_at	729.758	-1.01623	0.000199091	DOWN	PRKCB
219159_s_at	1093.21	-1.40161	0.000199091	DOWN	SLAMF7
225261_x_at	1888.41	1.12796	0.000192687	UP	NELFCD
220238_s_at	216.636	1.40916	0.000191778	UP	KLHL7
235229_at	830.241	-1.69098	0.00018938	DOWN	---
1568870_at	34.4036	-1.89793	0.000189251	DOWN	SLC24A4
206715_at	222.297	-1.02363	0.000187724	DOWN	TFEC
226983_at	65.8054	1.7582	0.000187724	UP	ZNF777
205391_x_at	26.514	-1.69919	0.000187517	DOWN	ANK1
214099_s_at	108.844	-1.54655	0.000185083	DOWN	LOC100996724
1555561_a_at	166.478	1.02688	0.000181971	UP	UGGT2
209595_at	643.958	1.13502	0.000181971	UP	GTF2F2
215602_at	110.446	-1.25128	0.000181354	DOWN	FGD2
211654_x_at	3091.65	-1.23469	0.000179362	DOWN	HLA-DQB1
209879_at	732.818	-1.10099	0.000164826	DOWN	SELPLG
232151_at	344.326	1.37106	0.000164826	UP	MACC1
235932_x_at	34.0814	-1.93267	0.000162337	DOWN	HMCN2
1564339_a_at	68.3441	2.00631	0.000161996	UP	CHRM3
205124_at	58.497	-1.9602	0.00016101	DOWN	MEF2B
244262_x_at	16.0637	-1.84968	0.00016101	DOWN	---
211656_x_at	3485.98	-1.31437	0.000157973	DOWN	HLA-DQB1
212686_at	425.605	1.13988	0.000157973	UP	PPM1H
207677_s_at	576.143	-1.37151	0.000154577	DOWN	NCF4
216541_x_at	1827.98	-2.37224	0.000154577	DOWN	IGHG1
216950_s_at	408.007	-1.48141	0.000154577	DOWN	FCGR1A
227353_at	782.459	-1.02286	0.000154577	DOWN	TMC8
239078_at	56.665	1.84571	0.000154498	UP	BROX
233029_at	86.8738	2.2062	0.00015294	UP	OBSCN
218507_at	1014.81	1.49864	0.000152826	UP	HILPDA
206978_at	506.276	-1.10328	0.000151235	DOWN	CCR2
218793_s_at	984.303	1.22048	0.000150108	UP	SCML1
215921_at	230.203	1.54769	0.000148011	UP	NPIPA5
212587_s_at	2140.81	-1.33091	0.000148005	DOWN	PTPRC
203868_s_at	1380.73	-1.09842	0.000140517	DOWN	VCAM1
221286_s_at	2724.09	-1.73563	0.000139075	DOWN	MZB1
240915_at	129.578	-1.98042	0.000138785	DOWN	IGHV1-69
205554_s_at	1952.14	-1.25776	0.000136471	DOWN	DNASE1L3
222265_at	86.1482	1.98629	0.000133538	UP	TNS4
227189_at	940.123	-1.29158	0.000133395	DOWN	CPNE5
209083_at	1718.82	-1.17164	0.000128126	DOWN	CORO1A
229481_at	100.161	1.84192	0.000128126	UP	NKD1
212998_x_at	3092.38	-1.29068	0.000126927	DOWN	HLA-DQB1
228090_at	269.016	1.09621	0.00012346	UP	NMNAT3
204661_at	1619	-1.54187	0.000107839	DOWN	CD52
202431_s_at	2278.22	1.50802	0.000106814	UP	MYC
206232_s_at	48.3736	1.80588	0.00010443	UP	B4GALT6
235574_at	199.335	-1.21765	0.000104178	DOWN	GBP4
224176_s_at	347.055	1.92724	9.8e-05	UP	AXIN2
1567627_at	33.1474	-1.29625	9.74e-05	DOWN	CD74
218963_s_at	498.22	2.97145	9.69e-05	UP	KRT23
214832_at	81.9701	1.78835	9.51e-05	UP	HNF4A
208087_s_at	118.234	-1.86284	8.89e-05	DOWN	ZBP1
1561615_s_at	129.408	-1.26026	8.81e-05	DOWN	SLC8A1
230656_s_at	1042.97	1.19461	8.81e-05	UP	CIRH1A
206067_s_at	44.8427	2.61581	8.8e-05	UP	WT1
211087_x_at	54.8636	1.65766	8.73e-05	UP	MAPK14
211367_s_at	1944.69	-1.0328	8.09e-05	DOWN	CASP1
218704_at	904.529	1.52203	8.08e-05	UP	RNF43
235670_at	251.725	-1.00045	8.08e-05	DOWN	STX11
207457_s_at	227.315	2.04206	8.03e-05	UP	LY6G6D
207500_at	1334.77	-1.65052	7.96e-05	DOWN	CASP5
204866_at	449.482	1.13022	7.57e-05	UP	JADE3
34210_at	1677.48	-1.64942	7.57e-05	DOWN	CD52
227168_at	133.332	-1.46598	6.89e-05	DOWN	MIAT
220892_s_at	775.374	1.80567	6.22e-05	UP	PSAT1
233220_at	139.372	-1.61133	6.1e-05	DOWN	GRIN3A
204815_s_at	93.1006	1.98974	6e-05	UP	DHX34
239966_at	90.8149	-1.22154	5.74e-05	DOWN	---
223253_at	880.809	1.25268	5.49e-05	UP	EPDR1
224243_at	86.6074	-1.50441	5.47e-05	DOWN	APOA5
207383_s_at	26.7213	2.38501	5.08e-05	UP	RHBDL1
225676_s_at	2413.93	1.0982	4.98e-05	UP	DCAF13
217777_s_at	1161.21	1.14266	4.58e-05	UP	PTPLAD1
214084_x_at	513.368	-1.41263	4.18e-05	DOWN	NCF1
204912_at	1066.68	-1.13819	3.68e-05	DOWN	IL10RA
236741_at	82.9421	2.59099	3.57e-05	UP	WDR72
238898_at	164.373	1.89875	3.57e-05	UP	LOC101060264
206670_s_at	50.5596	2.47324	3.51e-05	UP	GAD1
217388_s_at	995.337	-2.10373	3.5e-05	DOWN	KYNU
204961_s_at	661.136	-1.62348	3.43e-05	DOWN	NCF1
205047_s_at	1359.97	1.56119	3.05e-05	UP	ASNS
209030_s_at	679.44	-1.04995	2.88e-05	DOWN	CADM1
222858_s_at	623.1	-1.04431	2.86e-05	DOWN	DAPP1
203560_at	3649.02	1.15571	2.72e-05	UP	GGH
233510_s_at	281.445	-1.33744	2.6e-05	DOWN	PARVG
208394_x_at	208.657	1.99536	2.59e-05	UP	ESM1
204525_at	53.9354	1.30312	2.45e-05	UP	PHF14
204265_s_at	1336.63	-1.0542	2.43e-05	DOWN	GPSM3
209901_x_at	861.86	-1.53828	2.43e-05	DOWN	AIF1
234415_x_at	126.727	-2.27065	2.31e-05	DOWN	---
222838_at	1257.85	-1.47181	2.24e-05	DOWN	SLAMF7
206584_at	1249.74	-1.11855	2.04e-05	DOWN	LY96
208879_x_at	323.396	1.44925	2.02e-05	UP	PRPF6
217326_x_at	97.8919	-1.74212	1.97e-05	DOWN	BV03S1J2.2
223514_at	149.524	-2.04313	1.97e-05	DOWN	CARD11
219733_s_at	76.2705	2.59622	1.93e-05	UP	SLC27A5
238021_s_at	325.534	3.12113	1.93e-05	UP	CRNDE
200628_s_at	1999.87	-1.13109	1.92e-05	DOWN	WARS
241726_at	107.256	1.93067	1.92e-05	UP	---
206286_s_at	952.652	2.06902	1.89e-05	UP	TDGF1
219690_at	561.871	-1.07408	1.89e-05	DOWN	IGFLR1
207356_at	1050.7	-3.17282	1.82e-05	DOWN	DEFB4A
220377_at	123.563	-2.4215	1.69e-05	DOWN	KIAA0125
206170_at	302.102	-1.06717	1.62e-05	DOWN	ADRB2
221909_at	41.9017	2.53802	1.62e-05	UP	RNFT2
218984_at	1200.27	1.15336	1.57e-05	UP	PUS7
229215_at	854.935	2.15611	1.52e-05	UP	ASCL2
204698_at	1878.8	-1.69618	1.51e-05	DOWN	ISG20
214900_at	253.197	1.02969	1.5e-05	UP	ZKSCAN1
218145_at	1233.06	2.0046	1.5e-05	UP	TRIB3
239205_s_at	107.882	-1.3492	1.49e-05	DOWN	CR1
203208_s_at	1338.3	1.05491	1.47e-05	UP	MTFR1
205692_s_at	673.032	-1.47597	1.47e-05	DOWN	CD38
233880_at	146.955	-1.5557	1.43e-05	DOWN	RNF213
1555790_a_at	1502.4	1.02558	1.4e-05	UP	TMEM192
1555788_a_at	288.244	2.56487	1.33e-05	UP	TRIB3
225802_at	472.696	1.32646	1.32e-05	UP	TOP1MT
223385_at	1200.07	1.33617	1.27e-05	UP	CYP2S1
223642_at	105.037	3.75676	1.27e-05	UP	ZIC2
226878_at	929.999	-1.04053	1.27e-05	DOWN	HLA-DOA
1554321_a_at	358.228	1.31009	1.21e-05	UP	NFS1
232578_at	88.4654	-3.5472	1.21e-05	DOWN	CLDN18
235175_at	541.792	-1.07258	1.21e-05	DOWN	GBP4
209166_s_at	2106.13	-1.21744	1.09e-05	DOWN	MAN2B1
210538_s_at	1426.21	-1.12157	1.08e-05	DOWN	BIRC3
218744_s_at	28.7757	2.38911	1.08e-05	UP	PACSIN3
213320_at	528	1.24374	1.05e-05	UP	PRMT3
206210_s_at	35.9247	-3.09318	1.04e-05	DOWN	CETP
206224_at	188.967	3.50962	9.77e-06	UP	CST1
1555765_a_at	116.019	3.17251	9.46e-06	UP	GNG4
204849_at	586.497	1.46828	9.33e-06	UP	TCFL5
220307_at	47.0604	-1.83241	9.29e-06	DOWN	CD244
1553043_a_at	482.522	-1.29128	8.77e-06	DOWN	CD300LF
213095_x_at	966.626	-1.34467	8.62e-06	DOWN	AIF1
206942_s_at	29.9262	2.1202	8.62e-06	UP	PMCH
205184_at	427.473	1.9531	8.55e-06	UP	GNG4
1554887_at	40.6578	2.92616	8.25e-06	UP	LOC101927746
1564706_s_at	23.6749	2.53916	8.25e-06	UP	GLS2
222696_at	1666.41	1.46879	7.57e-06	UP	AXIN2
209426_s_at	1363.53	1.41523	7.5e-06	UP	AMACR
210143_at	434.233	-3.9013	7.17e-06	DOWN	ANXA10
210629_x_at	685.471	-1.04004	6.87e-06	DOWN	LST1
38964_r_at	3000.21	-1.0252	6.87e-06	DOWN	WAS
204279_at	4785.05	-1.12745	6.79e-06	DOWN	PSMB9
224701_at	1352.97	-1.0031	6.39e-06	DOWN	PARP14
202307_s_at	2985.5	-1.19437	5.98e-06	DOWN	TAP1
209822_s_at	334.81	1.46947	5.51e-06	UP	VLDLR
204128_s_at	465.396	2.02549	5.32e-06	UP	RFC3
201452_at	55.2829	1.61562	5.24e-06	UP	RHEB
234942_s_at	1096.19	1.30823	4.81e-06	UP	DNTTIP1
204533_at	1452.81	-1.79092	4.67e-06	DOWN	CXCL10
205295_at	413.757	3.05034	4.67e-06	UP	CKMT2
215051_x_at	1226.53	-1.36198	4.67e-06	DOWN	AIF1
226678_at	117.547	-1.96481	4.2e-06	DOWN	UNC13D
221653_x_at	334.51	-1.64547	3.98e-06	DOWN	APOL2
232311_at	220.334	-1.0978	3.98e-06	DOWN	B2M
225887_at	1266.36	1.26679	3.85e-06	UP	PROSER1
206696_at	72.7597	2.25902	3.5e-06	UP	GPR143
203438_at	127.885	2.87106	3.36e-06	UP	STC2
214054_at	374.428	-1.07536	3.3e-06	DOWN	DOK2
206513_at	422.576	-1.0967	2.78e-06	DOWN	AIM2
229937_x_at	483.296	-1.30977	2.78e-06	DOWN	---
220655_at	573.288	-3.26823	2.3e-06	DOWN	TNIP3
242116_x_at	117.267	1.33536	2.11e-06	UP	---
202509_s_at	201.649	-1.59065	2e-06	DOWN	TNFAIP2
1552584_at	328.591	-1.35335	1.99e-06	DOWN	IL12RB1
219593_at	875.62	-1.38539	1.73e-06	DOWN	SLC15A3
209937_at	123.989	-2.89525	1.68e-06	DOWN	TM4SF4
242907_at	1197.19	-1.25252	1.55e-06	DOWN	GBP2
226360_at	710.183	1.4447	1.55e-06	UP	ZNRF3
210037_s_at	1243	-2.31045	1.32e-06	DOWN	NOS2
229168_at	223.932	-1.02639	1.27e-06	DOWN	COL23A1
208025_s_at	505.678	1.05163	1.25e-06	UP	HMGA2
201061_s_at	4101.66	-1.1463	1.23e-06	DOWN	STOM
210157_at	108.756	1.57146	1.22e-06	UP	URI1
219505_at	2227.36	-1.39291	1.22e-06	DOWN	CECR1
223834_at	250.929	-1.07296	1.22e-06	DOWN	CD274
228439_at	1030.32	-1.32526	1.22e-06	DOWN	BATF2
230805_at	159.454	-2.72163	1.22e-06	DOWN	MIR142
214456_x_at	620.321	-3.17565	1.21e-06	DOWN	SAA1
204205_at	563.126	-1.18623	1.14e-06	DOWN	APOBEC3G
235643_at	305.445	-1.8457	1.07e-06	DOWN	SAMD9L
205910_s_at	160.425	4.37238	1.06e-06	UP	CEL
226603_at	1224.61	-1.29335	1.06e-06	DOWN	SAMD9L
209424_s_at	1173.71	1.4149	1.02e-06	UP	AMACR
238022_at	132.84	2.6646	1.02e-06	UP	CRNDE
220118_at	36.9452	-1.76855	9.7e-07	DOWN	ZBTB32
33304_at	2290.43	-1.35819	7.31e-07	DOWN	ISG20
204858_s_at	1213.16	-1.48763	7.26e-07	DOWN	TYMP
218187_s_at	1305.97	1.36902	6.86e-07	UP	C8orf33
230687_at	142.302	3.3864	5.4e-07	UP	SLC13A3
243271_at	286.607	-1.37568	5.37e-07	DOWN	---
202270_at	2099.26	-1.55461	4.35e-07	DOWN	GBP1
211505_s_at	2423.34	1.02742	3.99e-07	UP	STAU1
219716_at	1147.79	-1.07689	3.96e-07	DOWN	APOL6
223502_s_at	833.307	-1.55422	2.25e-07	DOWN	TNFSF13B
238327_at	520.127	-1.04269	2e-07	DOWN	ODF3B
230406_at	474.14	-1.45277	1.6e-07	DOWN	---
208725_at	122.141	3.16999	1.31e-07	UP	EIF2S2
209969_s_at	1013.55	-1.80451	1.18e-07	DOWN	STAT1
223501_at	889.095	-1.22648	9.83e-08	DOWN	TNFSF13B
230499_at	757.331	-1.01139	9.76e-08	DOWN	BIRC3
202531_at	2576.14	-1.22565	3.99e-08	DOWN	IRF1
204821_at	820.805	-1.20165	1.53e-08	DOWN	BTN3A3
209425_at	769.649	1.62987	1.02e-08	UP	AMACR
230036_at	678.705	-1.23889	9.13e-09	DOWN	SAMD9L
204158_s_at	1508.32	-1.1674	6.98e-09	DOWN	TCIRG1
229391_s_at	1035.83	-2.10668	6.98e-09	DOWN	FAM26F
226474_at	1433.12	-1.009	6.82e-09	DOWN	NLRC5
231577_s_at	3968.6	-1.84526	6.82e-09	DOWN	GBP1
207607_at	23.8514	4.6495	3.49e-09	UP	ASCL2
206011_at	1997.26	-1.40254	3.24e-09	DOWN	CASP1
217478_s_at	3714.41	-1.25246	3.24e-09	DOWN	HLA-DMA
202748_at	1795.11	-1.01599	2.92e-09	DOWN	GBP2
203932_at	3387.96	-1.49075	1.08e-09	DOWN	HLA-DMB
1553970_s_at	200.681	5.10314	6.92e-10	UP	CEL
200629_at	4229.96	-1.5193	6.92e-10	DOWN	WARS
205101_at	315.021	-1.26586	6.92e-10	DOWN	CIITA
220423_at	173.944	-4.08918	6.92e-10	DOWN	PLA2G2D
227458_at	802.805	-1.96582	6.92e-10	DOWN	CD274
203915_at	1966.36	-2.51901	3.78e-10	DOWN	CXCL9
1556267_at	46.5791	-3.33384	1.02e-10	DOWN	MYRFL
229543_at	319.441	-1.70828	1.02e-10	DOWN	RP1-93H18.6
238725_at	1346.9	-1.33623	1.02e-10	DOWN	IRF1
201649_at	2748.39	-1.16198	8.93e-11	DOWN	UBE2L6
220351_at	240.067	-2.02118	6.94e-11	DOWN	ACKR4
224498_x_at	136.415	3.30048	4.05e-11	UP	AXIN2
202269_x_at	3427.2	-1.85759	3.99e-11	DOWN	GBP1
229390_at	2288.23	-2.31057	3.16e-11	DOWN	FAM26F
240890_at	369.433	-1.18792	2.42e-11	DOWN	LOC643733
222868_s_at	777.299	-1.35695	6.25e-13	DOWN	IL18BP
209546_s_at	1375.07	-2.24493	7.46e-16	DOWN	APOL1
210029_at	1959.43	-3.0724	7.46e-16	DOWN	IDO1
1552701_a_at	2375.38	-1.26654	4.05e-16	DOWN	CARD16
204070_at	3201.21	-2.0647	7.44e-20	DOWN	RARRES3
