# Supplementary material for: Profiling the lncRNA-miRNA-mRNA ceRNA network to reveal potential crosstalk between inflammatory bowel disease and colorectal cancer
Source: PeerJ. 2019 Aug 26;7:e7451. doi: 10.7717/peerj.7451 (PMC6714963; doi:10.7717/peerj.7451)
Supplement: Table S4 [file peerj-07-7451-s004.xlsx]

## Sheet: Supplymentary Table 4 DEG_GSE41
Probe.Set.ID	Mean	log2(FC)	Pvalue	change	Gene.Symbol
1320_at	98.2352	-1.54647	0.0146235	DOWN	PTPN21
1552286_at	163.399	1.12819	0.00326007	UP	ATP6V1E2
1552334_at	220.378	-0.628651	0.0285752	NOT	TRIOBP
1552430_at	31.7336	-1.00779	0.0376146	DOWN	WDR17
1552470_a_at	112.191	-1.03601	0.00970838	DOWN	ABHD11
1552491_at	71.0236	1.27475	0.00671007	UP	IDI2
1552511_a_at	79.4549	-2.5578	0.000344793	DOWN	CPA6
1552519_at	539.191	-1.20799	0.00134227	DOWN	ACVR1C
1552553_a_at	121.371	1.38108	0.0118595	UP	NLRC4
1552626_a_at	374.564	1.61579	3.14e-05	UP	TMEM163
1552701_a_at	2375.38	1.3615	1.36e-13	UP	CARD16
1552703_s_at	2186.07	1.287	1.56e-11	UP	CARD16
1552768_at	30.4466	-1.02424	0.0302274	DOWN	CAMKK1
1553148_a_at	487.136	-0.874766	0.00455395	NOT	SNX13
1553297_a_at	1175.34	2.45248	5.44e-07	UP	CSF3R
1553364_at	38.9984	-1.28689	0.0179576	DOWN	PNPLA1
1553396_a_at	425.553	-1.80903	0.00521593	DOWN	CCDC13
1553420_at	157.194	-2.10653	0.000768154	DOWN	SATB2-AS1
1553622_a_at	31.8896	-1.57993	0.0248235	DOWN	FSIP1
1553675_at	165.027	-1.01117	0.0268772	DOWN	KLC4
1553681_a_at	746.026	0.845364	0.00588806	NOT	PRF1
1553828_at	2007.5	-1.3343	0.0286418	DOWN	NXPE1
1553846_at	16.1358	-1.09781	0.0113451	DOWN	SPERT
1553992_s_at	271.354	-0.59798	0.0315055	NOT	NBR2
1554014_at	296.773	0.620375	0.0132686	NOT	CHD2
1554027_a_at	118.885	-1.11881	0.0272559	DOWN	SLC4A4
1554094_at	271.017	-1.27799	0.0112234	DOWN	ENTPD5
1554106_at	391.028	-1.48556	0.000116335	DOWN	NBEAL1
1554140_at	64.6422	-1.24983	0.0174198	DOWN	WDR78
1554141_s_at	96.4365	-1.39591	0.0132595	DOWN	WDR78
1554212_s_at	75.8258	1.43238	0.00610577	UP	KCNS2
1554342_s_at	384.337	-0.574258	0.0255415	NOT	HELQ
1554344_s_at	1064.88	0.510951	0.00969244	NOT	AQP12A
1554384_at	96.2341	-1.1145	0.0158562	DOWN	PADI2
1554385_a_at	576.863	-1.70573	8.07e-07	DOWN	PADI2
1554449_at	179.896	-1.26649	0.0422975	DOWN	MIER3
1554462_a_at	1800.73	0.843072	0.00803395	NOT	DNAJB9
1554511_at	34.0665	-1.03899	0.0448663	DOWN	WWC1
1554522_at	253.459	-1.51804	0.000195081	DOWN	CNNM2
1554530_at	77.169	-3.68673	4.89e-08	DOWN	VSTM2A
1554723_x_at	5.32027	-2.07956	0.00298976	DOWN	---
1554827_a_at	21.8446	-0.799113	0.00290028	NOT	ADCY7
1554899_s_at	1898.07	1.47162	0.000327283	UP	FCER1G
1554943_at	530.834	-1.29512	5.17e-05	DOWN	VIL1
1554945_x_at	617.952	-1.19417	5.85e-05	DOWN	VIL1
1555103_s_at	23.7855	1.96319	0.00970838	UP	FGF7
1555166_a_at	34.618	-1.53382	0.00462112	DOWN	ZNF396
1555214_a_at	38.1573	2.00571	0.00798237	UP	CLEC7A
1555262_a_at	45.1067	-1.27511	0.030633	DOWN	MAGI1
1555306_a_at	275.365	-0.614841	0.00134211	NOT	ECE2
1555345_at	51.2351	-1.81857	0.0355503	DOWN	SLC38A4
1555349_a_at	1551.56	1.93672	9.48e-05	UP	ITGB2
1555471_a_at	53.8442	-1.34493	0.0153651	DOWN	FMN2
1555472_at	19.6791	-1.5724	0.000515254	DOWN	SORBS2
1555490_s_at	421.325	-1.39941	0.00608107	DOWN	PDZD3
1555564_a_at	457.726	3.22098	8.99e-11	UP	CFI
1555579_s_at	414.022	1.15234	0.000123962	UP	PTPRM
1555630_a_at	1083.56	1.2405	4.69e-07	UP	NARR
1555638_a_at	721.536	1.10889	0.0133084	UP	SAMSN1
1555723_at	131.156	-1.11215	0.00319846	DOWN	---
1555724_s_at	3054.08	1.34944	0.000278745	UP	TAGLN
1555725_a_at	878.192	1.48633	0.000699067	UP	RGS5
1555736_a_at	861.417	1.16675	1.93e-05	UP	AGTRAP
1555738_at	21.4013	-1.18297	0.0388453	DOWN	CMTM1
1555756_a_at	311.336	1.43416	0.000599616	UP	CLEC7A
1555762_s_at	412.463	0.833089	0.00258563	NOT	RBM15
1555896_a_at	1123.01	1.18207	5.24e-08	UP	ADAM15
1555950_a_at	5204.55	3.06525	1.36e-13	UP	CD55
1555997_s_at	179.549	1.67959	0.000120178	UP	IGFBP5
1556159_at	26.9341	-2.16573	0.00251756	DOWN	---
1556213_a_at	90.7256	-1.54727	0.0019833	DOWN	BTG3
1556221_a_at	204.963	-1.09164	0.00588246	DOWN	RP11-757F18.5
1556267_at	46.5791	3.22324	1.79e-07	UP	MYRFL
1556283_s_at	425.878	0.616683	0.000173585	NOT	FGFR1OP2
1556314_a_at	243.285	0.89254	0.00690697	NOT	RP11-389C8.2
1556318_s_at	55.8733	-1.00625	0.0233277	DOWN	CAND1
1556320_at	51.4094	-0.570977	0.0340147	NOT	STOML1
1556417_a_at	30.8129	-1.48077	0.0162005	DOWN	---
1556499_s_at	13968.1	0.826953	0.000822546	NOT	COL1A1
1556507_at	1714.44	0.581937	0.0144587	NOT	LINC01210
1556643_at	214.185	1.38403	0.000232054	UP	LOC100507535
1556986_at	162.612	-1.37074	8.6e-06	DOWN	OR2H1
1557002_x_at	103.22	1.27261	0.00849903	UP	ESPNL
1557119_a_at	602.411	-1.0853	0.000455247	DOWN	ZNF575
1557131_at	37.812	-1.19405	0.0188612	DOWN	SSSCA1-AS1
1557154_at	79.6567	1.40883	0.00857652	UP	---
1557177_at	25.0467	1.76166	0.0040927	UP	LOC100506258
1557197_a_at	240.336	-1.12687	0.00078087	DOWN	LGALS3
1557225_at	86.7836	-1.8038	0.00150289	DOWN	ASPG
1557226_a_at	103.446	-1.62323	0.00997676	DOWN	ASPG
1557236_at	458.353	1.08963	0.000147085	UP	APOL6
1557270_at	323.712	-1.01048	0.000854738	DOWN	---
1557293_at	329.095	-1.20669	0.0128768	DOWN	LINC00969
1557326_at	7.38572	-1.81696	0.00717322	DOWN	---
1557466_at	123.075	-0.617278	0.0378202	NOT	FLJ31104
1557475_at	15.3518	-2.03596	0.0052807	DOWN	LINC00507
1557661_at	72.9735	-0.876769	0.0372892	NOT	---
1557714_at	51.755	-1.01325	0.020431	DOWN	CTBP1
1557780_at	25.3949	-1.83957	6.67e-05	DOWN	---
1557918_s_at	537.691	-1.464	0.000152294	DOWN	SLC16A1
1557924_s_at	99.4914	1.41531	0.00451851	UP	ALPL
1557938_s_at	930.97	1.18731	9.63e-05	UP	PTRF
1558027_s_at	402.183	-0.80498	0.00076607	NOT	PRKAB2
1558148_x_at	199.485	-0.544877	0.00782784	NOT	BAIAP2-AS1
1558154_at	321.048	-1.03614	0.0015873	DOWN	AF289551
1558220_at	411.523	-1.39206	0.00220882	DOWN	---
1558323_at	169.272	-2.68958	2.17e-05	DOWN	TMEM72
1558324_a_at	483.885	-2.21129	0.0031169	DOWN	TMEM72
1558397_at	337.863	2.21486	3.4e-09	UP	PECAM1
1558406_a_at	33.1252	-1.24285	0.0493156	DOWN	---
1558517_s_at	241.12	0.952015	0.00318815	NOT	LOC101927933
1558540_s_at	57.9424	1.32125	0.0158867	UP	SLC2A11
1558549_s_at	344.972	2.96127	1.51e-08	UP	VNN1
1558613_at	232.957	-1.03931	0.000300435	DOWN	---
1558653_at	30.6313	2.7431	0.0002913	UP	MLK7-AS1
1558887_at	42.1107	-2.17173	0.000105934	DOWN	ZNF321P
1558888_x_at	46.4912	-2.06631	3.96e-05	DOWN	ZNF321P
1558976_x_at	27.2209	-1.14609	0.0381706	DOWN	UBALD1
1559051_s_at	192.864	1.20894	1.61e-05	UP	MB21D1
1559094_at	155.322	-0.991154	0.0008101	NOT	FBXO9
1559239_s_at	30.9776	-1.45404	0.0214637	DOWN	ACAT1
1559282_at	28.1647	-1.40582	0.0235946	DOWN	---
1559291_at	37.2246	-1.89368	0.00530642	DOWN	LINC00032
1559322_at	218.173	-1.04898	0.00636722	DOWN	LOC727916
1559351_at	83.8289	-1.6361	0.00480239	DOWN	---
1559533_at	30.0402	-1.1593	0.0246999	DOWN	---
1559651_at	14.671	-1.52555	0.00978412	DOWN	CSNK1A1P1
1559731_x_at	59.3889	-1.20031	0.0393981	DOWN	MACROD1
1559737_at	13.0981	-1.97128	0.000447818	DOWN	---
1559739_at	171.96	-1.3505	0.000525649	DOWN	CHPT1
1559800_a_at	13.2043	-1.24023	0.0119838	DOWN	AX748066
1559884_at	38.3643	-2.71242	0.00213125	DOWN	CDKN2B-AS1
1560010_a_at	432.78	-1.74729	0.0285752	DOWN	SATB2-AS1
1560034_a_at	85.3182	0.987127	0.00065927	NOT	---
1560402_at	161.546	-0.663057	0.0100181	NOT	GAS5
1560412_at	72.383	-1.17343	0.0399475	DOWN	LOC100507506
1560678_at	20.0846	-1.50093	0.015385	DOWN	---
1560692_at	59.3172	-1.24522	0.0203655	DOWN	VSTM2A
1560720_at	64.3284	-1.051	0.0180649	DOWN	MKNK1
1560765_a_at	28.8857	-1.31741	0.028964	DOWN	BC043540
1560869_a_at	83.2542	-1.27637	0.0396539	DOWN	---
1560896_a_at	34.0922	-2.05328	0.00121162	DOWN	---
1560971_a_at	29.9576	-1.16695	0.00118608	DOWN	---
1561041_at	45.5436	-1.45442	0.00374448	DOWN	TNRC6C
1561067_at	25.6159	-1.80963	4.37e-06	DOWN	---
1561094_a_at	14.6385	-1.50318	0.0496418	DOWN	SLC22A25
1561261_at	27.6019	-1.316	0.0334708	DOWN	CTD-2587M23.1
1561342_at	49.1291	-1.38667	0.0364916	DOWN	LOC150005
1561355_at	56.0194	2.01498	0.00788643	UP	LOC692247
1561574_at	21.5378	-1.43546	0.00472841	DOWN	---
1561593_at	24.5331	-1.66557	0.00655978	DOWN	BC032916
1561909_at	119.489	-0.726989	0.0367863	NOT	BC052578
1562020_s_at	45.3138	2.41926	0.000132082	UP	NT5DC4
1562057_at	7.57123	-1.09877	0.02316	DOWN	---
1562110_at	77.1928	-1.04894	0.0156306	DOWN	BC022892
1562152_at	7.5593	-1.23014	0.00809145	DOWN	LOC101928298
1562270_at	64.5942	-1.00287	0.0344825	DOWN	ARHGEF7
1562286_at	12.0321	-2.75302	4.21e-06	DOWN	---
1562414_at	31.4246	-1.55491	0.00514152	DOWN	LOC100509814
1562416_at	415.056	-0.758734	0.0228705	NOT	---
1562492_at	27.7593	-1.78842	0.00473219	DOWN	LOC340090
1562576_at	21.3002	-1.47521	0.0405222	DOWN	---
1562628_at	18.0236	-1.65696	0.00803557	DOWN	KRT40
1562788_at	23.2542	-1.16681	0.00270932	DOWN	LINC01342
1562823_at	18.4205	-1.72251	0.0259114	DOWN	ROR1-AS1
1562961_at	17.9673	-1.26965	0.0487946	DOWN	CTD-2293H3.1
1562970_at	45.987	-1.20606	0.0290986	DOWN	---
1563032_at	8.34936	-1.76055	0.00857652	DOWN	---
1563033_x_at	10.5033	-1.74731	0.0093745	DOWN	---
1563053_at	7.22053	-1.23546	0.0210176	DOWN	LOC729083
1563179_at	9.83512	-1.23072	0.0306644	DOWN	RP3-400B16.4
1563182_at	230.191	-1.06488	0.00263747	DOWN	ACVR1C
1563591_at	10.6304	-1.537	0.0124459	DOWN	LOC100506403
1563635_at	64.0416	-1.47146	0.00341147	DOWN	ITGA9-AS1
1563668_at	59.3719	-1.45323	0.00481764	DOWN	MORN1
1563692_at	536.546	-2.08992	0.0165335	DOWN	---
1563792_at	922.372	-1.23646	0.0107848	DOWN	AMN
1563821_at	78.6031	-1.28933	0.0184296	DOWN	LINC00858
1564039_at	32.6148	-1.20272	0.0382991	DOWN	ZSCAN23
1564070_s_at	131.214	-1.16904	0.00474788	DOWN	HOTTIP
1564323_at	357.871	-1.86587	0.00262125	DOWN	LOC101928405
1564435_a_at	15.763	-1.60104	0.00226246	DOWN	KRT72
1565800_x_at	7.92408	-1.85229	0.0445967	DOWN	RAB3IP
1565814_at	35.253	-1.10394	0.018855	DOWN	TRIM36
1566127_at	21.5117	-1.26632	0.0323476	DOWN	AC010095.5
1566145_s_at	129.451	-1.15073	0.0354437	DOWN	LOC101928669
1566269_at	32.179	-1.35329	0.020006	DOWN	RALGAPA1
1566278_at	43.763	-1.38911	0.025778	DOWN	---
1566442_at	23.6456	-1.84722	0.000548511	DOWN	---
1566478_at	7.67252	-1.45468	0.0123878	DOWN	C17orf104
1566571_at	75.218	-1.16372	0.00953457	DOWN	---
1566638_at	37.7147	-1.46995	0.0304494	DOWN	---
1566698_at	21.2647	-1.63143	0.0122621	DOWN	---
1566771_at	36.1704	1.32025	0.0188447	UP	---
1566924_at	63.8663	-1.18419	0.0304494	DOWN	---
1567064_at	15.1871	-1.68477	0.0108563	DOWN	OR1Q1
1567706_at	64.3678	-1.6466	5.79e-05	DOWN	---
1568592_at	1290.16	1.10246	8.85e-07	UP	TRIM69
1568699_at	163.933	0.490127	0.0198469	NOT	IFT43
1568719_s_at	76.7849	-1.30444	0.00815537	DOWN	SLC22A23
1569029_at	60.5534	-1.01436	0.0206439	DOWN	METAP1D
1569142_at	131.717	-0.947925	0.0306495	NOT	TRIM13
1569238_a_at	89.0721	-1.07226	0.020497	DOWN	---
1569277_at	55.0768	-1.25533	0.00223545	DOWN	ZNF91
1569542_at	121.046	-1.93353	6.43e-07	DOWN	GPR125
1569743_at	23.7642	-1.00151	0.00641067	DOWN	---
1569768_at	9.01538	-1.53455	0.0320097	DOWN	---
1569796_s_at	48.7679	1.83131	0.000215413	UP	ATRNL1
1569867_at	342.115	-0.490699	0.0340147	NOT	EME2
1569871_at	747.127	0.937424	2.17e-05	NOT	LMF1
1569932_at	112.06	-1.09519	0.0199832	DOWN	NHSL2
1569941_at	21.8863	-1.53072	0.0343602	DOWN	---
1570397_x_at	11.7454	-1.30692	0.0118543	DOWN	FAM66C
1570585_at	50.9375	-1.15313	0.0343602	DOWN	MPZL3
200615_s_at	1720.56	0.786828	0.000885538	NOT	AP2B1
200622_x_at	1804.96	0.390024	0.0173682	NOT	CALM1
200628_s_at	1999.87	1.98395	3.06e-12	UP	WARS
200629_at	4229.96	2.43857	7.38e-19	UP	WARS
200660_at	10501.7	1.93238	3.24e-07	UP	S100A11
200670_at	8795.16	0.953747	1.16e-05	NOT	XBP1
200675_at	9108.94	0.609928	0.0168522	NOT	CD81
200697_at	2740.38	1.11523	4.77e-06	UP	HK1
200782_at	6136.62	1.06727	1.75e-07	UP	ANXA5
200788_s_at	3588.28	1.21915	2.55e-07	UP	PEA15
200805_at	1617.13	0.385083	0.00940338	NOT	LMAN2
200808_s_at	2154.09	1.27195	0.000141757	UP	ZYX
200814_at	5230.85	0.670686	3.23e-06	NOT	PSME1
200825_s_at	5088.24	1.00425	5.96e-06	UP	HYOU1
200844_s_at	7721.04	-1.11218	5.34e-06	DOWN	PRDX6
200845_s_at	8825.94	-1.3345	4.73e-05	DOWN	PRDX6
200859_x_at	2474.45	1.20928	0.00182624	UP	FLNA
200880_at	3255.37	0.518024	0.0337139	NOT	DNAJA1
200884_at	5437.63	-1.65584	0.0016698	DOWN	CKB
200887_s_at	6263.11	1.37449	1.64e-12	UP	STAT1
200890_s_at	1909.19	0.601554	0.00988946	NOT	SSR1
200945_s_at	6308.57	0.376929	0.000131957	NOT	SEC31A
200961_at	3518.59	-0.649466	0.00383655	NOT	SEPHS2
200964_at	8297.93	0.568371	0.00472676	NOT	UBA1
200967_at	11766.4	0.421306	0.0385818	NOT	PPIB
200971_s_at	12368.1	0.410399	0.0106636	NOT	LOC101928061
200985_s_at	4913.76	0.824456	0.00152313	NOT	CD59
200986_at	2194.85	1.51971	1.16e-06	UP	SERPING1
201004_at	14751	0.58881	0.00378854	NOT	SSR4
201012_at	4058.22	2.05997	4.6e-08	UP	ANXA1
201034_at	7195.37	-0.602484	0.000937197	NOT	ADD3
201037_at	3040.41	0.991352	0.00122698	NOT	PFKP
201042_at	2026.74	2.0689	6.77e-10	UP	TGM2
201061_s_at	4101.66	1.8013	2.87e-12	UP	STOM
201063_at	3713.01	0.975464	3.72e-05	NOT	RCN1
201103_x_at	5456.88	-0.332086	0.0317392	NOT	NBPF10
201159_s_at	140.025	0.984898	0.0152581	NOT	NMT1
201162_at	8343.11	1.33235	5.88e-05	UP	IGFBP7
201169_s_at	574.051	1.56395	0.00298976	UP	BHLHE40
201170_s_at	3377.79	1.41919	1.99e-05	UP	BHLHE40
201174_s_at	1775.98	0.494012	0.010756	NOT	TERF2IP
201231_s_at	11510.2	0.641674	0.040287	NOT	ENO1
201239_s_at	5130.64	0.389404	0.0352623	NOT	SPCS2
201251_at	8672.48	1.24232	7.22e-05	UP	PKM
201261_x_at	874.425	1.8441	0.000284713	UP	BGN
201315_x_at	10412.2	2.11809	1.33e-10	UP	IFITM2
201341_at	2575.46	0.788401	0.00478245	NOT	ENC1
201389_at	857.314	2.29478	2.2e-06	UP	ITGA5
201393_s_at	2771.11	0.639659	0.0105507	NOT	IGF2R
201438_at	6962.87	2.21364	4.9e-10	UP	COL6A3
201460_at	1937.94	0.750592	3.22e-05	NOT	MAPKAPK2
201461_s_at	716.027	0.803235	0.00431602	NOT	MAPKAPK2
201462_at	970.214	0.784425	0.0222439	NOT	SCRN1
201506_at	7079.96	1.13204	0.00287237	UP	TGFBI
201543_s_at	1260.59	0.922169	2.95e-05	NOT	SAR1A
201564_s_at	246.204	1.81045	0.000925292	UP	FSCN1
201601_x_at	8361.47	1.80177	1.15e-06	UP	IFITM1
201605_x_at	1723.2	0.911269	5.25e-05	NOT	CNN2
201631_s_at	5855.62	1.6253	0.00135961	UP	IER3
201641_at	1001.38	1.45277	0.000167778	UP	BST2
201645_at	1984	2.71614	2.82e-07	UP	TNC
201648_at	5264.28	0.493072	0.00576687	NOT	JAK1
201649_at	2748.39	1.80328	3.58e-19	UP	UBE2L6
201659_s_at	2341.48	0.649459	0.00220703	NOT	ARL1
201666_at	10109.5	2.55592	1.95e-10	UP	TIMP1
201719_s_at	2220.06	0.980102	0.000450455	NOT	EPB41L2
201744_s_at	7299.29	1.18024	7.79e-05	UP	LUM
201762_s_at	8441.5	1.22031	2.4e-11	UP	MIR7703
201780_s_at	1565.9	0.564623	0.00352274	NOT	RNF13
201809_s_at	885.698	1.69202	1.11e-06	UP	ENG
201818_at	1128.17	3.02623	4.09e-12	UP	LPCAT1
201850_at	1687.12	0.947612	0.024599	NOT	CAPG
201858_s_at	4011.84	1.84672	5.09e-05	UP	SRGN
201859_at	8655.87	1.18092	3.63e-05	UP	SRGN
201885_s_at	5896.54	0.527444	0.016548	NOT	CYB5R3
201906_s_at	1993.31	-0.790129	0.00252948	NOT	CTDSPL
201923_at	7053.22	0.869673	0.000860592	NOT	PRDX4
201925_s_at	3385.21	3.24829	3.66e-13	UP	CD55
201926_s_at	5099.77	3.17738	2.91e-13	UP	CD55
201940_at	1217.66	0.421066	0.0340954	NOT	CPD
201954_at	5997.12	1.10892	1.51e-06	UP	ARPC1B
201959_s_at	1186.01	0.89672	0.000450455	NOT	MYCBP2
201960_s_at	2026.09	1.00225	6.55e-05	UP	MYCBP2
201963_at	1779.29	1.80462	0.00054775	UP	ACSL1
202007_at	2121.65	1.26298	1.16e-05	UP	NID1
202018_s_at	865.393	5.7726	6.35e-07	UP	LTF
202030_at	767.407	0.581244	0.00315602	NOT	BCKDK
202068_s_at	2188.91	0.800523	0.0238307	NOT	LDLR
202083_s_at	348.826	1.1974	6.52e-07	UP	SEC14L1
202084_s_at	2259.64	0.770183	3.89e-05	NOT	SEC14L1
202086_at	1172.05	1.48591	0.00104581	UP	MX1
202112_at	1514.02	2.5092	5.93e-14	UP	VWF
202116_at	677.529	0.711377	0.00465178	NOT	DPF2
202125_s_at	1593.58	-0.666549	0.00022197	NOT	TRAK2
202134_s_at	207.861	2.43322	1.37e-19	UP	WWTR1
202153_s_at	1378.14	0.803939	0.000646035	NOT	NUP62
202161_at	559.902	0.888589	0.00265172	NOT	PKN1
202179_at	642.557	0.654437	0.00232316	NOT	BLMH
202202_s_at	1170.84	0.932522	0.000755943	NOT	LAMA4
202218_s_at	301.223	2.08549	0.0155685	UP	FADS2
202235_at	384.956	-1.33108	0.000384826	DOWN	SLC16A1
202236_s_at	3060.49	-1.43593	0.000263401	DOWN	SLC16A1
202237_at	1951.75	2.53839	1.66e-07	UP	LOC101928916
202238_s_at	1247.85	2.54588	5.44e-07	UP	LOC101928916
202242_at	2197.8	-1.14593	0.00773072	DOWN	TSPAN7
202252_at	3221.49	0.795143	0.00198854	NOT	RAB13
202266_at	8880.77	-1.00263	0.000862915	DOWN	TDP2
202269_x_at	3427.2	2.42531	4.82e-14	UP	GBP1
202270_at	2099.26	2.43266	4.32e-13	UP	GBP1
202275_at	689.964	1.20766	0.000284851	UP	G6PD
202286_s_at	784.239	3.72988	4.62e-06	UP	TACSTD2
202291_s_at	1017.63	1.79148	7.66e-07	UP	MGP
202295_s_at	5872.59	1.41447	0.000100894	UP	CTSH
202307_s_at	2985.5	1.85555	1.07e-10	UP	TAP1
202310_s_at	10484.8	2.09749	4.04e-06	UP	COL1A1
202311_s_at	1464.05	2.27774	5.85e-05	UP	COL1A1
202329_at	2709.77	0.835935	0.000368542	NOT	CSK
202351_at	3269.76	0.826617	6.68e-06	NOT	ITGAV
202357_s_at	2203.29	2.8694	6.57e-14	UP	CFB
202375_at	1215.89	0.937574	0.00025746	NOT	SEC24D
202376_at	1948.95	5.45638	1.36e-13	UP	SERPINA3
202391_at	3930.81	1.89448	1.13e-06	UP	BASP1
202400_s_at	316.873	0.908545	0.000673759	NOT	SRF
202404_s_at	7221.76	2.50774	4.18e-08	UP	COL1A2
202409_at	691.219	1.52154	5.06e-05	UP	IGF2
202418_at	2657.07	0.519469	0.0220038	NOT	YIF1A
202450_s_at	2963.34	1.63248	1.2e-06	UP	CTSK
202464_s_at	1822.89	2.39771	4.15e-06	UP	PFKFB3
202478_at	1147.37	2.16095	4.59e-09	UP	TRIB2
202488_s_at	5896.59	-1.33614	0.00368859	DOWN	FXYD3
202497_x_at	906.339	2.56848	0.000305785	UP	SLC2A3
202499_s_at	766.048	2.46562	2.43e-05	UP	SLC2A3
202509_s_at	201.649	1.32473	0.00114822	UP	TNFAIP2
202551_s_at	2256.36	0.450099	0.0312107	NOT	CRIM1
202558_s_at	783.875	1.07312	2.78e-05	UP	HSPA13
202625_at	2226.02	1.6194	1.06e-11	UP	LYN
202626_s_at	1781.96	1.63363	2.94e-09	UP	LYN
202627_s_at	594.845	2.14885	0.000180879	UP	SERPINE1
202628_s_at	675.685	4.34766	1.84e-11	UP	SERPINE1
202637_s_at	1330.23	2.26821	8.69e-07	UP	ICAM1
202638_s_at	1325.42	2.58415	3.83e-09	UP	ICAM1
202651_at	1778.11	1.00214	4.49e-05	UP	LPGAT1
202659_at	2675.47	1.00296	3.82e-08	UP	PSMB10
202663_at	341.027	0.89379	0.0219701	NOT	WIPF1
202664_at	1357.61	1.15555	0.000479319	UP	WIPF1
202671_s_at	1797.87	0.916971	0.000182921	NOT	PDXK
202679_at	809.582	0.750776	0.000416083	NOT	NPC1
202727_s_at	6599.48	0.600146	0.00145542	NOT	IFNGR1
202731_at	3291.95	-1.06274	0.00648041	DOWN	MIR4680
202743_at	931.427	1.50205	3.28e-12	UP	PIK3R3
202748_at	1795.11	1.30878	2.21e-11	UP	GBP2
202759_s_at	2218.48	0.882024	1.56e-05	NOT	AKAP2
202766_s_at	1159.73	1.63729	9.09e-06	UP	FBN1
202794_at	2428.08	0.629435	0.0027723	NOT	INPP1
202800_at	153.33	2.59353	0.00287265	UP	SLC1A3
202803_s_at	2894.71	1.81772	6.5e-06	UP	ITGB2
202804_at	1508.17	1.113	3.07e-05	UP	ABCC1
202827_s_at	564.767	2.41644	1.51e-05	UP	MMP14
202834_at	1126.79	1.20037	0.0165664	UP	AGT
202835_at	221.333	-0.783314	0.00674065	NOT	TXNL4A
202841_x_at	790.543	0.812274	0.000468355	NOT	OGFR
202842_s_at	4001.65	0.903732	2.76e-05	NOT	DNAJB9
202843_at	636.28	0.978637	5.24e-06	NOT	DNAJB9
202856_s_at	2912.82	1.33689	0.0017751	UP	MIR6787
202859_x_at	7726.36	4.84236	7.31e-10	UP	CXCL8
202878_s_at	1926.98	1.72499	1.48e-06	UP	CD93
202887_s_at	3770.33	1.93047	4.13e-06	UP	DDIT4
202895_s_at	211.011	1.02318	0.00403561	UP	SIRPA
202897_at	679.601	1.44869	7.76e-05	UP	SIRPA
202898_at	653.734	0.90892	6.21e-05	NOT	SDC3
202912_at	3417.68	2.30427	4.92e-07	UP	ADM
202917_s_at	7945.47	5.67863	4.23e-19	UP	S100A8
202938_x_at	317.793	-0.768454	0.0344573	NOT	RRP7A
202998_s_at	2049.52	2.09385	3.76e-06	UP	LOXL2
203024_s_at	2700.6	0.505981	0.00528158	NOT	C5orf15
203036_s_at	43.9471	-1.12305	0.0498333	DOWN	MTSS1
203065_s_at	876.975	1.64011	2.66e-07	UP	CAV1
203066_at	1298.83	1.59407	8.37e-07	UP	CHST15
203083_at	893.828	3.16922	1.18e-05	UP	THBS2
203085_s_at	1072.72	1.45554	0.000403673	UP	TGFB1
203114_at	404.02	0.722779	0.00915067	NOT	SSSCA1
203126_at	2269.95	-0.795312	0.0089926	NOT	IMPA2
203136_at	4906.67	0.647752	0.00076007	NOT	RABAC1
203140_at	1291.64	1.97036	2.63e-05	UP	BCL6
203149_at	946.638	1.14091	4.65e-06	UP	PVRL2
203279_at	1263.04	0.448904	0.0169526	NOT	EDEM1
203323_at	769.663	0.765832	0.00132065	NOT	CAV2
203324_s_at	725.518	1.19675	6.29e-05	UP	CAV2
203367_at	406.261	1.40325	0.000172147	UP	DUSP14
203370_s_at	477.901	0.801187	0.0142988	NOT	PDLIM7
203390_s_at	332.956	1.01027	0.00326125	UP	KIF3C
203402_at	346.608	0.989873	0.0283174	NOT	KCNAB2
203414_at	1426.25	0.683128	0.00325813	NOT	MMD
203416_at	4705.08	1.21404	0.000137669	UP	CD53
203417_at	637.875	1.34783	0.00238217	UP	MFAP2
203435_s_at	281.877	3.01727	0.00728916	UP	MME
203441_s_at	120.936	0.68551	0.026499	NOT	CDH2
203456_at	495.369	1.14226	0.000173085	UP	PRAF2
203471_s_at	1445.11	1.86485	0.000589382	UP	PLEK
203484_at	6031.55	0.467712	0.0374843	NOT	SEC61G
203499_at	943.071	1.20984	0.000981285	UP	EPHA2
203507_at	404.384	1.1201	0.000443828	UP	CD68
203518_at	607.18	0.747405	0.00170609	NOT	LYST
203530_s_at	1236.48	0.38776	0.0125341	NOT	STX4
203535_at	3106.09	5.30596	2.91e-13	UP	S100A9
203541_s_at	74.9359	-1.02096	0.0259882	DOWN	KLF9
203545_at	1491.48	0.502687	0.00111026	NOT	ALG8
203548_s_at	314.853	3.41541	2.94e-07	UP	LPL
203556_at	1048	1.20358	7.78e-07	UP	ZHX2
203562_at	472.713	0.607555	0.00861836	NOT	FEZ1
203576_at	1364.69	-0.918949	0.000158309	NOT	BCAT2
203591_s_at	504.079	3.11053	8.64e-06	UP	CSF3R
203595_s_at	948.089	1.04989	5.29e-06	UP	IFIT5
203596_s_at	606.751	0.945819	3.45e-07	NOT	IFIT5
203605_at	1677.79	0.565503	2.74e-05	NOT	SRP54
203620_s_at	680.999	0.835737	0.000338801	NOT	FCHSD2
203632_s_at	368.969	1.69182	2.2e-09	UP	GPRC5B
203659_s_at	880.675	-0.37114	0.00457559	NOT	TRIM13
203675_at	2210.35	0.861654	0.00128228	NOT	NUCB2
203687_at	95.0104	2.73289	1.16e-06	UP	CX3CL1
203691_at	7092.36	4.3217	1.2e-13	UP	PI3
203693_s_at	701.929	0.672323	0.00332706	NOT	E2F3
203697_at	826.908	-1.01653	0.00572293	DOWN	FRZB
203702_s_at	346.604	1.10754	0.00340452	UP	TTLL4
203722_at	254.667	2.07164	0.0134459	UP	ALDH4A1
203745_at	1222.22	-0.573082	0.00854048	NOT	HCCS
203753_at	1296.82	0.882308	0.000440127	NOT	TCF4
203761_at	1229.5	1.45109	1.88e-05	UP	SLA
203769_s_at	549.506	0.574727	0.0395568	NOT	STS
203770_s_at	83.7799	2.89061	6.77e-06	UP	STS
203771_s_at	146.059	1.47177	0.00060698	UP	BLVRA
203773_x_at	737.71	1.16259	0.000146369	UP	BLVRA
203817_at	620.666	1.86015	9.26e-09	UP	GUCY1B3
203819_s_at	108.938	2.52256	0.00620602	UP	IGF2BP3
203854_at	1013.04	3.30217	7.4e-15	UP	CFI
203879_at	782.84	1.72444	1.46e-05	UP	PIK3CD
203882_at	2837.22	0.860666	1.53e-05	NOT	IRF9
203887_s_at	498.256	1.64898	4.67e-06	UP	THBD
203910_at	530.002	1.3318	2.23e-06	UP	ARHGAP29
203915_at	1966.36	3.07547	3.03e-11	UP	CXCL9
203921_at	691.929	1.57318	8.62e-06	UP	CHST2
203922_s_at	431.862	1.18261	0.00274586	UP	CYBB
203932_at	3387.96	1.25475	2.85e-05	UP	HLA-DMB
203934_at	456.88	1.221	5.07e-07	UP	KDR
203936_s_at	4495.05	3.04228	5.08e-06	UP	MMP9
203944_x_at	885.583	0.390131	0.0172783	NOT	BTN2A1
203964_at	2795.99	0.972855	6.68e-06	NOT	NMI
203988_s_at	989.417	1.16888	6.92e-06	UP	FUT8
204006_s_at	787.655	2.92019	5.77e-06	UP	FCGR3A
204007_at	1994.59	3.45413	2.59e-07	UP	FCGR3B
204014_at	190.258	2.45437	3.78e-05	UP	DUSP4
204015_s_at	346.106	2.71577	0.000408157	UP	DUSP4
204058_at	651.23	1.66395	0.000185963	UP	ME1
204059_s_at	1627.7	1.41981	0.000198894	UP	ME1
204070_at	3201.21	1.48165	1.84e-07	UP	RARRES3
204079_at	1121.68	1.13573	2.62e-08	UP	TPST2
204083_s_at	1430.1	1.5416	2.07e-05	UP	TPM2
204122_at	2157.05	0.927877	0.00592705	NOT	TYROBP
204135_at	1650.41	1.13779	2.02e-05	UP	FILIP1L
204153_s_at	604.56	0.708041	0.00511065	NOT	MFNG
204163_at	590.112	1.06829	0.000984724	UP	EMILIN1
204164_at	355.231	0.941521	0.0162126	NOT	SIPA1
204166_at	752.854	1.56949	2.74e-06	UP	SBNO2
204197_s_at	689.696	1.25619	9.7e-05	UP	RUNX3
204205_at	563.126	1.38298	6.13e-07	UP	APOBEC3G
204208_at	301	0.820069	0.0155185	NOT	RNGTT
204217_s_at	265.624	1.00026	1.99e-06	UP	RTN2
204220_at	769.223	1.14141	0.000299595	UP	GMFG
204222_s_at	519.205	0.930827	0.00403242	NOT	GLIPR1
204231_s_at	724.953	-0.689625	0.00572293	NOT	FAAH
204249_s_at	1057.27	1.00493	5.77e-08	UP	LMO2
204259_at	2374.13	4.2697	2.86e-08	UP	MMP7
204265_s_at	1336.63	1.17892	4.28e-05	UP	GPSM3
204266_s_at	676.577	-0.66095	0.040218	NOT	CHKA
204269_at	1324.7	1.72211	1.1e-07	UP	PIM2
204279_at	4785.05	1.98115	1.57e-13	UP	PSMB9
204281_at	393.2	1.67942	0.0120353	UP	TEAD4
204328_at	1048.49	0.678395	0.00193974	NOT	TMC6
204334_at	377.249	0.815015	0.00112049	NOT	KLF7
204336_s_at	879.512	0.885739	0.000323078	NOT	RGS19
204363_at	2711.59	0.817694	0.00431602	NOT	F3
204379_s_at	826.439	-1.29141	0.0018519	DOWN	FGFR3
204385_at	586.114	1.69945	0.00013798	UP	KYNU
204396_s_at	1360.07	0.85115	2.93e-05	NOT	GRK5
204414_at	26.1368	-1.26895	0.0337547	DOWN	LARGE
204415_at	1156.52	1.6989	0.000199179	UP	IFI6
204423_at	362.947	0.72607	0.0136692	NOT	MKLN1
204431_at	487.707	-0.964103	0.00032051	NOT	TLE2
204436_at	1045.9	1.07039	2.59e-05	UP	PLEKHO2
204454_at	336.715	1.062	3.07e-05	UP	LDOC1
204457_s_at	231.559	3.29339	1.37e-07	UP	GAS1
204464_s_at	738.592	1.87916	4.22e-05	UP	EDNRA
204468_s_at	254.062	2.78045	1.48e-09	UP	TIE1
204470_at	6075.23	4.51712	1.31e-15	UP	CXCL1
204475_at	6056.08	4.42605	9.46e-08	UP	MMP1
204480_s_at	2487.6	0.655052	0.0262792	NOT	C9orf16
204502_at	709.942	0.999027	0.00040687	NOT	SAMHD1
204533_at	1452.81	2.59449	1.82e-09	UP	CXCL10
204544_at	509.206	0.920761	3.12e-05	NOT	HPS5
204547_at	1056.36	-1.25365	2.9e-06	DOWN	RAB40B
204563_at	1376.72	2.43157	0.00022527	UP	SELL
204575_s_at	545.968	2.36867	3.2e-09	UP	MMP19
204580_at	9208.78	2.48173	1.37e-05	UP	MMP12
204607_at	5163.16	-2.08008	0.00678286	DOWN	HMGCS2
204619_s_at	698.229	1.14737	0.00102858	UP	VCAN
204639_at	506.037	1.64998	4.56e-05	UP	ADA
204677_at	673.415	1.35632	1.21e-05	UP	CDH5
204682_at	645.421	1.13144	0.00310914	UP	LTBP2
204698_at	1878.8	2.63548	8.27e-10	UP	ISG20
204719_at	789.895	-1.9499	0.00634533	DOWN	ABCA8
204747_at	745.131	1.78201	1.5e-08	UP	IFIT3
204769_s_at	681.331	1.01032	0.00867007	UP	TAP2
204770_at	231.75	0.835524	0.00155528	NOT	TAP2
204789_at	353.273	1.56278	0.000704387	UP	FMNL1
204820_s_at	4029.85	0.996211	1.49e-05	NOT	BTN3A2
204821_at	820.805	1.4591	2.47e-09	UP	BTN3A3
204858_s_at	1213.16	2.12408	1.45e-10	UP	TYMP
204874_x_at	24.0504	-1.03395	0.0326667	DOWN	BAIAP3
204879_at	283.221	4.46905	4.67e-10	UP	PDPN
204924_at	597.799	2.35915	1.88e-05	UP	TLR2
204929_s_at	449.301	0.974572	6.43e-05	NOT	VAMP5
204939_s_at	257.094	1.21798	0.0246324	UP	PLN
204959_at	1216.79	2.68943	2.67e-06	UP	MNDA
204971_at	837.819	1.83177	0.000408157	UP	CSTA
204994_at	775.222	1.14031	0.00111413	UP	MX2
205002_at	113.779	1.75818	0.000339709	UP	AHDC1
205005_s_at	411.918	-0.626376	0.000189766	NOT	NMT2
205013_s_at	341.234	0.774203	0.00060698	NOT	ADORA2A
205019_s_at	1321.47	-1.35397	0.000256281	DOWN	VIPR1
205027_s_at	337.001	1.60185	5.76e-05	UP	MAP3K8
205040_at	60.1182	1.73328	0.0249522	UP	ORM1
205044_at	150.574	2.60273	3.12e-05	UP	GABRP
205074_at	1455.99	-1.11676	0.000591203	DOWN	SLC22A5
205076_s_at	2822.73	-1.00256	0.00800576	DOWN	MTMR11
205097_at	10667.5	-1.91568	0.00339337	DOWN	SLC26A2
205098_at	849.272	1.36467	0.000193636	UP	CCR1
205101_at	315.021	1.51908	1.87e-10	UP	CIITA
205112_at	807.408	-1.0095	0.0350751	DOWN	PLCE1
205114_s_at	1247.57	2.47193	0.000510832	UP	CCL3
205119_s_at	1565.31	3.34586	2.46e-06	UP	FPR1
205124_at	58.497	2.43393	3.72e-05	UP	MEF2B
205153_s_at	457.661	2.09359	5.14e-10	UP	CD40
205154_at	135.432	-2.35985	0.00152283	DOWN	LRRN2
205159_at	1995.52	1.79812	1.48e-06	UP	CSF2RB
205160_at	833.872	-1.15065	3.59e-05	DOWN	PEX11A
205207_at	689.301	2.46537	0.000974829	UP	IL6
205220_at	2062.47	5.67604	2.58e-10	UP	HCAR3
205234_at	155.863	2.9866	1.19e-09	UP	SLC16A4
205237_at	489.548	2.733	1.1e-07	UP	FCN1
205249_at	255.888	1.12888	0.0327788	UP	EGR2
205286_at	275.032	2.60425	8.99e-06	UP	TFAP2C
205288_at	205.269	-1.45026	0.000651224	DOWN	CDC14A
205294_at	269.7	0.389097	0.0373761	NOT	BAIAP2
205303_at	204.694	2.6343	2.2e-09	UP	KCNJ8
205306_x_at	262.995	0.942982	0.0118154	NOT	KMO
205308_at	507.558	0.488735	0.00523634	NOT	ZC2HC1A
205325_at	49.5453	-1.22717	0.00686107	DOWN	PHYHIP
205326_at	738.493	1.34433	2.43e-09	UP	RAMP3
205346_at	84.681	1.96837	4.64e-05	UP	ST3GAL2
205364_at	550.282	-1.14215	0.000981285	DOWN	ACOX2
205376_at	287.317	0.895139	0.000123777	NOT	INPP4B
205379_at	408.855	2.09186	1.33e-07	UP	CBR3
205403_at	2947.36	-1.24281	0.0288953	DOWN	IL1R2
205412_at	4926.13	-1.02122	1.82e-05	DOWN	ACAT1
205467_at	760.254	1.15773	2.12e-08	UP	CASP10
205479_s_at	2049.18	2.55912	8.2e-08	UP	PLAU
205483_s_at	2630.65	1.6761	4.97e-05	UP	ISG15
205484_at	257.347	1.5322	0.021305	UP	SIT1
205495_s_at	373.789	2.42376	5.9e-05	UP	GNLY
205498_at	425.301	-1.61835	0.00386457	DOWN	GHR
205513_at	1424.14	3.85617	5.44e-07	UP	TCN1
205524_s_at	132.17	-1.59473	0.0191566	DOWN	HAPLN1
205535_s_at	57.0215	1.5561	0.00185837	UP	PCDH7
205544_s_at	977.302	2.44128	0.0161581	UP	CR2
205568_at	918.393	6.24587	3.11e-12	UP	AQP9
205569_at	906.226	2.71277	2.86e-08	UP	LAMP3
205572_at	292.753	2.91803	5.84e-08	UP	ANGPT2
205582_s_at	160.688	2.75531	1.56e-05	UP	GGT5
205594_at	561.305	-0.805622	0.000205445	NOT	ZNF652
205612_at	153.779	1.8115	2.2e-05	UP	MMRN1
205613_at	130.428	-1.34502	0.00683577	DOWN	SYT17
205619_s_at	302.864	1.58467	4.67e-07	UP	MEOX1
205654_at	811.125	2.7978	8.8e-08	UP	C4BPA
205656_at	573.795	1.91395	7.79e-08	UP	PCDH17
205671_s_at	396.801	2.24122	0.000249594	UP	HLA-DOB
205680_at	1157.09	4.04849	2.14e-07	UP	MMP10
205681_at	1418.15	3.33543	1.28e-06	UP	BCL2A1
205692_s_at	673.032	2.17928	6.67e-09	UP	CD38
205717_x_at	1401.42	1.03285	0.000138101	UP	PCDHGA1
205720_at	37.5594	-1.11879	0.0142437	DOWN	POMC
205757_at	1067.86	-1.39449	0.00154821	DOWN	ENTPD5
205771_s_at	931.851	-1.05448	0.00290028	DOWN	AKAP7
205776_at	1330.26	-1.02129	0.0382236	DOWN	FMO5
205778_at	150.374	2.54792	0.0253216	UP	KLK7
205779_at	308.696	0.736438	0.0284389	NOT	RAMP2
205781_at	245.848	0.837321	0.0183813	NOT	VPS9D1
205809_s_at	956.383	-1.12047	0.00883579	DOWN	WASL
205815_at	8104.16	6.71737	5.78e-15	UP	REG3A
205828_at	6775.14	5.56917	7.6e-13	UP	MMP3
205831_at	1291.94	0.846744	0.018346	NOT	CD2
205844_at	1002.65	4.42828	4.42e-13	UP	VNN1
205860_x_at	181.801	5.48021	1.89e-09	UP	FOLH1
205866_at	212.946	2.76154	1.3e-14	UP	FCN3
205874_at	334.829	-1.54854	2.85e-05	DOWN	ITPKA
205886_at	8232.17	6.19083	8.51e-13	UP	REG1B
205890_s_at	3840.72	3.61189	1.76e-13	UP	GABBR1
205901_at	343.701	1.39006	6.51e-06	UP	PNOC
205903_s_at	126.533	4.81944	1.36e-14	UP	KCNN3
205916_at	35.1995	1.74409	0.00861836	UP	S100A7
205920_at	107.775	2.60438	0.000798027	UP	SLC6A6
205922_at	342.303	3.62318	2.14e-06	UP	VNN2
205943_at	660.105	2.34103	1.62e-05	UP	TDO2
205950_s_at	13028.8	-1.95513	0.0438502	DOWN	CA1
205965_at	579.085	1.46837	5.58e-06	UP	BATF
206025_s_at	639.512	2.50082	0.00119626	UP	TNFAIP6
206026_s_at	1016.64	3.21254	3.12e-05	UP	TNFAIP6
206027_at	200.692	0.994456	0.0264364	NOT	S100A3
206048_at	270.131	-1.24962	0.01027	DOWN	OVOL2
206049_at	611.471	1.60289	1.48e-06	UP	SELP
206059_at	2843.86	-1.08754	7.5e-06	DOWN	ZNF91
206064_s_at	80.8396	-1.62431	0.00117532	DOWN	PPIL2
206092_x_at	473.454	1.77996	7.12e-05	UP	RTEL1
206121_at	365.284	-1.07216	0.00348976	DOWN	AMPD1
206172_at	471.664	3.93826	2.31e-07	UP	IL13RA2
206194_at	233.741	0.739836	0.00991601	NOT	HOXC4
206206_at	408.09	1.62063	0.00125116	UP	CD180
206210_s_at	35.9247	3.1711	0.000124053	UP	CETP
206211_at	234.542	3.95589	8.92e-08	UP	SELE
206214_at	1186.88	1.32686	0.00799245	UP	PLA2G7
206244_at	107.023	2.56472	5.44e-07	UP	CR1
206247_at	635.023	1.16374	0.000168225	UP	MICB
206272_at	990.094	-0.724917	3.77e-05	NOT	RAB4A
206331_at	353.185	1.15635	6.88e-05	UP	CALCRL
206332_s_at	3023.81	1.01291	1.54e-05	UP	IFI16
206336_at	1631.38	4.54521	5.31e-19	UP	CXCL6
206360_s_at	456.031	0.960125	0.0150225	NOT	SOCS3
206361_at	251.926	-1.03395	0.0132263	DOWN	PTGDR2
206375_s_at	126.141	-2.87662	1.05e-07	DOWN	HSPB3
206380_s_at	113.581	3.98821	6.26e-09	UP	CFP
206385_s_at	1716.13	-1.01583	0.00154399	DOWN	ANK3
206389_s_at	124.227	-1.52076	0.0243691	DOWN	PDE3A
206390_x_at	286.835	1.48459	0.00204633	UP	PF4
206420_at	650.072	1.24817	0.000500373	UP	IGSF6
206421_s_at	343.822	5.36702	2.17e-07	UP	SERPINB7
206453_s_at	2317.07	-1.07502	0.010307	DOWN	NDRG2
206467_x_at	1434.5	2.65337	4.45e-08	UP	RTEL1-TNFRSF6B
206487_at	99.2466	-1.59473	0.00641067	DOWN	SUN1
206502_s_at	247.692	-1.22935	0.0350907	DOWN	INSM1
206503_x_at	91.3827	2.85385	2.59e-07	UP	PML
206513_at	422.576	1.71933	2.04e-11	UP	AIM2
206522_at	202.99	2.35896	0.00888787	UP	MGAM
206539_s_at	1594.79	-1.05262	0.0347112	DOWN	CYP4F12
206569_at	404.987	3.28859	0.000485121	UP	IL24
206570_s_at	59.9918	-1.52911	0.00219818	DOWN	PSG11
206571_s_at	749.839	1.19287	0.000721527	UP	MAP4K4
206618_at	157.429	1.80076	3.51e-07	UP	IL18R1
206623_at	210.876	-1.64227	0.00140639	DOWN	PDE6A
206628_at	894.284	1.77255	1.42e-05	UP	SLC5A1
206632_s_at	814.952	-1.05394	0.0033057	DOWN	APOBEC3B
206633_at	167.383	-1.2322	3.14e-05	DOWN	CHRNA1
206698_at	1781.03	-0.821441	0.0408141	NOT	XK
206702_at	384.319	0.933784	8.26e-10	NOT	TEK
206712_at	72.757	-1.45223	0.00686299	DOWN	GRTP1
206715_at	222.297	1.03462	0.00129498	UP	TFEC
206716_at	49.0623	-1.19941	0.0150758	DOWN	UMOD
206743_s_at	43.1656	1.53403	0.0399186	UP	ASGR1
206749_at	39.5585	1.99044	0.00124487	UP	CD1B
206784_at	6684.68	-2.96415	0.0109701	DOWN	AQP8
206796_at	226.216	2.63663	6.98e-07	UP	WISP1
206818_s_at	549.295	-0.552686	0.00889966	NOT	CNNM2
206869_at	89.7766	-2.3635	0.00355088	DOWN	CHAD
206870_at	309.37	-0.811428	0.00580493	NOT	PPARA
206900_x_at	359.256	-0.521188	0.00443808	NOT	ZNF253
206924_at	306.493	4.79169	1.77e-05	UP	IL11
206941_x_at	47.1727	-2.41727	7.61e-05	DOWN	SEMA3E
206980_s_at	36.5848	0.946276	0.023142	NOT	FLT3LG
206983_at	168.3	1.40079	0.000123491	UP	CCR6
206997_s_at	93.295	-1.46378	0.000824069	DOWN	HS6ST1
207008_at	473.132	3.68352	4.87e-08	UP	CXCR2
207011_s_at	463.706	1.1085	0.00328581	UP	PTK7
207014_at	221.37	-1.05671	0.00988223	DOWN	GABRA2
207016_s_at	350.771	2.18214	0.0227375	UP	ALDH1A2
207030_s_at	714.731	1.48735	0.000100539	UP	CSRP2
207051_at	835.212	-1.55591	0.00298128	DOWN	SLC17A4
207052_at	153.425	-1.9798	1.83e-06	DOWN	HAVCR1
207054_at	6.967	-1.56022	0.0196691	DOWN	IMPG1
207070_at	56.5679	-1.28467	0.018352	DOWN	RGR
207076_s_at	12701.3	1.47763	6.37e-06	UP	ASS1
207096_at	283.709	1.03299	0.00135285	UP	SAA2-SAA4
207104_x_at	343.536	2.12793	0.000168759	UP	LILRB1
207109_at	59.0289	-1.40329	0.0274469	DOWN	POU2F3
207111_at	306.639	0.926856	0.00836928	NOT	EMR1
207137_at	45.3562	-1.09797	0.0387207	DOWN	TONSL
207172_s_at	817.716	0.877028	0.000887908	NOT	CDH11
207173_x_at	2242.82	1.46437	5.47e-07	UP	CDH11
207177_at	153.72	2.39946	0.000635575	UP	PTGFR
207188_at	174.757	-1.2264	0.00562291	DOWN	CDK3
207266_x_at	745.781	1.80855	5.2e-05	UP	RBMS1
207271_x_at	8.46962	-1.00309	0.0306546	DOWN	SPAG11A
207356_at	1050.7	5.24736	6.87e-11	UP	DEFB4A
207375_s_at	910.799	0.959756	8.55e-08	NOT	IL15RA
207379_at	255.905	-1.03435	0.0299803	DOWN	EDIL3
207388_s_at	234.52	0.969563	0.0231775	NOT	PTGES
207419_s_at	831.042	1.34857	6.31e-05	UP	RAC2
207432_at	1505.69	-1.74745	0.0482331	DOWN	BEST2
207436_x_at	865.657	-0.513362	0.00415236	NOT	SORBS1
207442_at	286.094	4.71578	2.66e-06	UP	CSF3
207480_s_at	315.53	0.80333	0.0102225	NOT	MEIS2
207500_at	1334.77	1.79262	0.000205392	UP	CASP5
207509_s_at	257.457	1.79101	0.000297065	UP	LAIR2
207513_s_at	1072.07	0.745676	3.31e-06	NOT	ZNF189
207530_s_at	145.085	-1.56309	0.0176086	DOWN	CDKN2B
207540_s_at	1058.59	0.582452	0.00315725	NOT	SYK
207567_at	113.727	-1.37507	0.0399083	DOWN	SLC13A2
207571_x_at	611.585	1.33326	2.81e-05	UP	THEMIS2
207610_s_at	356.547	1.77652	4.98e-05	UP	EMR2
207677_s_at	576.143	1.12277	0.0123097	UP	NCF4
207697_x_at	469.077	2.80905	2.83e-09	UP	LILRB2
207707_s_at	3192.82	0.578932	0.00429327	NOT	SEC13
207730_x_at	863.59	-0.525357	0.0347018	NOT	---
207734_at	634.251	1.08137	0.000516562	UP	LAX1
207750_at	11.5455	-1.45732	0.0418168	DOWN	EPS15P1
207777_s_at	289.769	1.08665	0.000409948	UP	LOC101928789
207778_at	197.08	2.66146	0.000340312	UP	REG1P
207836_s_at	690.188	1.88738	4.75e-10	UP	RBPMS
207847_s_at	6546.4	1.57212	0.00118938	UP	MUC1
207850_at	2724.74	4.19321	1.01e-10	UP	CXCL3
207877_s_at	353.042	-1.06391	0.0247087	DOWN	NVL
207945_s_at	1481.5	0.381307	0.0331917	NOT	CSNK1D
208012_x_at	1230.65	1.1255	5.05e-07	UP	SP110
208025_s_at	505.678	-1.08901	1.61e-05	DOWN	HMGA2
208043_at	13.6837	-1.08671	0.0183526	DOWN	---
208082_x_at	1071.46	-0.425882	0.0274469	NOT	MKRN4P
208087_s_at	118.234	1.45629	0.014292	UP	ZBP1
208091_s_at	4481.16	0.833399	5.83e-06	NOT	VOPP1
208092_s_at	474.189	1.04923	9.7e-06	UP	FAM49A
208103_s_at	541.798	0.99966	0.00502852	NOT	ANP32E
208131_s_at	283.09	0.956412	0.0358727	NOT	PTGIS
208135_at	167.877	-1.49324	0.0194875	DOWN	HNF1B
208184_s_at	649.872	-0.444408	0.00497611	NOT	LOC102724200
208209_s_at	858.607	4.51918	5.2e-13	UP	C4BPB
208219_at	30.1229	-1.10546	0.0165664	DOWN	ACVR1B
208250_s_at	11775.9	3.47425	3.11e-08	UP	DMBT1
208257_x_at	41.7246	1.50907	0.00288461	UP	PSG1
208306_x_at	16857	1.06939	4.2e-05	UP	HLA-DRB1
208322_s_at	173.906	1.70501	8.26e-05	UP	ST3GAL1
208335_s_at	634.626	2.61338	1.19e-06	UP	ACKR1
208359_s_at	43.8705	-1.25199	0.00231875	DOWN	KCNJ4
208361_s_at	369.718	0.649518	0.0100409	NOT	POLR3D
208367_x_at	43.6002	-1.25021	0.0447941	DOWN	CYP3A4
208383_s_at	4026.78	-2.1754	0.00588246	DOWN	PCK1
208387_s_at	102.317	0.709054	0.0331917	NOT	MMP24
208438_s_at	559.313	2.89017	1.52e-09	UP	FGR
208451_s_at	1568.17	2.33963	4.35e-10	UP	C4A
208510_s_at	1417.79	-1.09959	0.0413101	DOWN	PPARG
208528_x_at	17.9151	-1.12272	0.00642524	DOWN	SSX3
208534_s_at	356.22	1.6219	2.78e-12	UP	LOC102725198
208540_x_at	7388.23	2.11169	9.61e-07	UP	S100A11P1
208596_s_at	2091.63	-1.277	0.0249661	DOWN	UGT1A1
208607_s_at	300.422	3.92775	9.35e-09	UP	SAA1
208634_s_at	2475.18	0.702542	5.34e-05	NOT	MACF1
208636_at	5295.43	1.00723	0.000115342	UP	ACTN1
208658_at	2142.93	0.875497	0.000317257	NOT	PDIA4
208677_s_at	6033.58	-0.987394	0.000556388	NOT	BSG
208782_at	4164.53	1.66999	1.09e-06	UP	FSTL1
208788_at	2433.08	1.69355	1.19e-05	UP	ELOVL5
208790_s_at	316.275	1.26718	0.00030448	UP	PTRF
208791_at	1630.5	2.05538	0.00266329	UP	CLU
208792_s_at	1210.62	1.66783	0.00183214	UP	CLU
208806_at	129.918	2.17818	2.81e-05	UP	CHD3
208829_at	6552.05	0.652077	9.43e-05	NOT	TAPBP
208842_s_at	4087.95	0.374714	0.0265546	NOT	GORASP2
208850_s_at	1044.96	1.44923	0.000255691	UP	THY1
208851_s_at	1152.14	2.08763	7.22e-08	UP	THY1
208874_x_at	1087.62	0.640564	0.0194175	NOT	PPP2R4
208894_at	15844.6	0.881995	0.000752477	NOT	HLA-DRA
208905_at	18387.7	-0.511238	0.00633327	NOT	CYCS
208920_at	1323.03	-1.51442	0.000155747	DOWN	SRI
208944_at	3029.4	0.694561	0.000144244	NOT	TGFBR2
208965_s_at	1085.43	1.07502	2.08e-05	UP	IFI16
208966_x_at	2698.69	1.31143	1.26e-07	UP	IFI16
208981_at	2096.44	1.75263	8.42e-11	UP	PECAM1
208982_at	2339.94	2.25537	3.2e-09	UP	PECAM1
208983_s_at	806.918	1.80586	5.77e-08	UP	PECAM1
208991_at	5763.05	0.875936	1.26e-07	NOT	STAT3
208992_s_at	2322.95	0.901313	6.02e-05	NOT	STAT3
209006_s_at	1435.3	-1.10133	0.00493406	DOWN	LOC101928189
209016_s_at	223.74	4.37186	2.82e-07	UP	KRT7
209021_x_at	1299.83	0.865238	9.79e-05	NOT	ATG13
209030_s_at	679.44	1.03746	0.000479319	UP	CADM1
209035_at	962.894	1.25046	0.000132082	UP	MDK
209037_s_at	465.463	1.20112	5.82e-05	UP	EHD1
209040_s_at	3805.86	1.05694	2.58e-09	UP	PSMB8
209070_s_at	2155.76	2.12492	6.42e-07	UP	RGS5
209071_s_at	3637.1	2.01015	1.26e-08	UP	RGS5
209077_at	1508.76	-0.473603	0.00964836	NOT	TXN2
209081_s_at	1296.43	1.84011	2.65e-06	UP	COL18A1
209082_s_at	1043.38	1.47349	5.04e-06	UP	COL18A1
209083_at	1718.82	1.41392	4.32e-05	UP	CORO1A
209086_x_at	475.564	1.35614	0.000591203	UP	MCAM
209111_at	2259.61	-0.42839	0.00975178	NOT	RNF5
209150_s_at	2251.74	0.470641	0.00720214	NOT	IPO4
209183_s_at	696.263	1.5267	1.54e-05	UP	C10orf10
209191_at	1236.9	1.16383	6.4e-05	UP	TUBB6
209210_s_at	1032.89	0.901787	0.000164719	NOT	FERMT2
209212_s_at	4299.22	-1.03376	0.00417573	DOWN	KLF5
209261_s_at	194.969	-1.51044	0.0166057	DOWN	NR2F6
209278_s_at	653.68	2.99633	0.000581772	UP	TFPI2
209282_at	1026.23	0.566924	4.95e-05	NOT	PRKD2
209306_s_at	1184.08	1.05681	7.16e-05	UP	SWAP70
209307_at	750.774	1.03775	0.000425587	UP	SWAP70
209310_s_at	743.94	0.758914	0.00143914	NOT	CASP4
209312_x_at	16969.9	0.89447	0.000292945	NOT	HLA-DQB1
209360_s_at	847.982	0.823609	0.00199876	NOT	LOC100506403
209387_s_at	2185.67	1.69677	0.000418779	UP	TM4SF1
209395_at	1950.39	5.99299	1.51e-22	UP	CHI3L1
209396_s_at	1832.57	6.65563	1.04e-25	UP	CHI3L1
209424_s_at	1173.71	-1.15125	0.00109437	DOWN	AMACR
209425_at	769.649	-1.52865	7.58e-06	DOWN	AMACR
209426_s_at	1363.53	-1.20687	0.00165855	DOWN	AMACR
209465_x_at	391.837	-1.42516	0.00137691	DOWN	PTN
209473_at	1076.75	1.2812	1.05e-06	UP	ENTPD1
209485_s_at	641.081	-1.08573	0.00710093	DOWN	OSBPL1A
209487_at	1441.46	1.17811	4.67e-06	UP	RBPMS
209488_s_at	1552.95	1.26408	8.46e-08	UP	RBPMS
209505_at	606.259	0.656901	0.0266372	NOT	NR2F1
209544_at	203.801	1.03724	0.000792597	UP	RIPK2
209545_s_at	849.2	1.15824	4.32e-06	UP	RIPK2
209546_s_at	1375.07	3.02451	1.87e-20	UP	APOL1
209581_at	434.93	1.433	0.00433087	UP	PLA2G16
209582_s_at	267.837	0.509453	0.0303727	NOT	CD200
209596_at	2704.01	1.57693	5.99e-05	UP	MXRA5
209619_at	21018.5	0.610447	0.0069198	NOT	CD74
209632_at	384.721	-1.02927	0.00688271	DOWN	PPP2R3A
209640_at	232.73	0.854072	0.000108176	NOT	PML
209683_at	246.907	1.6726	2.73e-05	UP	FAM49A
209685_s_at	729.758	1.25364	4.64e-05	UP	PRKCB
209720_s_at	222.352	5.64102	1.23e-08	UP	SERPINB3
209735_at	1346.31	-1.7819	0.0195187	DOWN	ABCG2
209752_at	12484.3	6.71845	1.01e-17	UP	REG1A
209759_s_at	1262.1	-0.530152	0.024009	NOT	ECI1
209762_x_at	963.835	1.2111	2.5e-08	UP	SP110
209774_x_at	2578.42	3.52949	7.26e-09	UP	CXCL2
209791_at	3309.09	-1.72029	0.00122121	DOWN	PADI2
209792_s_at	1117.71	6.65027	2.78e-09	UP	KLK10
209807_s_at	64.0561	-1.38963	0.0167857	DOWN	NFIX
209818_s_at	121.949	0.877219	0.0399076	NOT	HABP4
209821_at	338.455	2.16578	1.6e-07	UP	IL33
209822_s_at	334.81	-1.48177	8.97e-05	DOWN	VLDLR
209829_at	428.821	2.20952	0.00133429	UP	FAM65B
209835_x_at	2419.35	1.25091	0.000564722	UP	CD44
209844_at	689.462	-2.6839	0.0197626	DOWN	HOXB13
209865_at	1870.15	-0.849371	0.00298354	NOT	SLC35A3
209871_s_at	78.8254	1.95327	0.00531216	UP	APBA2
209874_x_at	540.91	-0.596087	0.0152929	NOT	CNNM2
209875_s_at	1548.41	2.18272	0.00369031	UP	SPP1
209879_at	732.818	1.26195	0.000154979	UP	SELPLG
209900_s_at	1032.57	-1.27363	0.000462823	DOWN	SLC16A1
209921_at	711.07	1.80347	0.000137869	UP	SLC7A11
209934_s_at	727.162	0.781997	1.23e-05	NOT	ATP2C1
209935_at	412.501	0.844663	0.000411765	NOT	ATP2C1
209937_at	123.989	3.07619	1.23e-05	UP	TM4SF4
209960_at	220.613	2.0528	1.17e-09	UP	HGF
209969_s_at	1013.55	2.81351	7.59e-14	UP	STAT1
209970_x_at	4871.56	1.35589	2.7e-09	UP	CASP1
209993_at	1126.83	-1.5243	0.00146673	DOWN	ABCB1
209994_s_at	903.596	-1.49809	0.000637287	DOWN	ABCB1
209999_x_at	128.027	3.56363	7.73e-08	UP	SOCS1
210001_s_at	728.591	2.30931	2.37e-08	UP	SOCS1
210029_at	1959.43	4.01898	1.8e-19	UP	IDO1
210037_s_at	1243	3.20786	1.66e-09	UP	NOS2
210041_s_at	582.261	0.830828	0.00741359	NOT	PGM3
210056_at	284.162	1.7476	1.23e-05	UP	RND1
210086_at	178.307	-1.46167	0.0088426	DOWN	HR
210100_s_at	128.872	-1.20207	0.0412365	DOWN	ABCA2
210101_x_at	4374.22	0.451	0.0191276	NOT	SH3GLB1
210106_at	248.883	-1.89201	0.0159736	DOWN	BLOC1S1-RDH5
210133_at	2522.85	2.10916	4.47e-05	UP	CCL11
210139_s_at	3526.18	0.998814	0.0015501	NOT	PMP22
210143_at	434.233	4.30786	1.73e-05	UP	ANXA10
210163_at	488.571	4.29821	3.43e-09	UP	CXCL11
210164_at	693.098	3.36009	1.29e-09	UP	GZMB
210167_s_at	41.6033	-1.9958	0.00479382	DOWN	TEF
210184_at	276.552	1.7507	0.00117119	UP	ITGAX
210191_s_at	284.519	0.617997	0.000717185	NOT	PHTF1
210229_s_at	75.9606	1.89592	0.0293983	UP	CSF2
210244_at	55.1439	1.08103	0.0141056	UP	CAMP
210327_s_at	94.2184	-1.6764	0.00791685	DOWN	AGXT
210341_at	32.2451	-1.39696	0.0209708	DOWN	MYT1
210344_at	17.9692	-1.08487	0.012865	DOWN	OSBPL7
210354_at	140.357	1.26365	9.56e-05	UP	IFNG
210367_s_at	596.362	1.82076	0.000229043	UP	PTGES
210439_at	104.767	2.56902	0.000734023	UP	ICOS
210448_s_at	676.232	1.53377	2.74e-05	UP	P2RX5
210462_at	24.5758	-1.85754	0.000877395	DOWN	BLZF1
210473_s_at	1379.43	-1.08488	1.38e-05	DOWN	GPR125
210497_x_at	49.1854	-1.46499	0.00129785	DOWN	SSX2
210511_s_at	474.388	5.52824	1.14e-08	UP	INHBA
210534_s_at	291.415	0.966436	0.00926487	NOT	B9D1
210538_s_at	1426.21	1.62547	7.47e-09	UP	BIRC3
210557_x_at	130.705	-1.51053	0.00118903	DOWN	CSF1
210605_s_at	628.8	1.12636	0.00528158	UP	MFGE8
210619_s_at	221.611	2.33095	3.82e-05	UP	HYAL1
210625_s_at	1873.01	-0.712557	0.00785441	NOT	AKAP1
210626_at	150.48	-1.03948	0.0107627	DOWN	AKAP1
210629_x_at	685.471	1.33033	2.98e-07	UP	LST1
210659_at	238.268	0.779381	0.00832806	NOT	CMKLR1
210663_s_at	564.409	3.16393	1.46e-10	UP	KYNU
210724_at	160.196	1.63912	0.00253981	UP	EMR3
210727_at	88.1542	-1.62438	0.00359757	DOWN	CALCA
210754_s_at	2095.5	1.48274	1.71e-08	UP	LYN
210762_s_at	724.1	0.830946	0.00292576	NOT	DLC1
210772_at	303.31	3.45116	1.55e-06	UP	FPR2
210773_s_at	230.618	3.0965	9.8e-07	UP	FPR2
210869_s_at	1052.76	1.93597	3.02e-07	UP	MCAM
210873_x_at	445.488	1.41026	0.0358414	UP	APOBEC3A
210893_at	20.0164	-1.63222	0.00262735	DOWN	---
210916_s_at	918.354	0.983955	0.00384875	NOT	CD44
210933_s_at	631.379	1.37545	0.00410585	UP	FSCN1
210961_s_at	36.1748	-1.09627	0.0496549	DOWN	ADRA1D
210992_x_at	210.273	2.13356	0.00147193	UP	FCGR2C
211003_x_at	380.709	2.96778	1.91e-07	UP	TGM2
211012_s_at	475.901	2.44952	7.4e-06	UP	PML
211062_s_at	128.078	3.17346	2.54e-07	UP	CPZ
211066_x_at	2028.69	0.979461	0.00077714	NOT	PCDHGA1
211100_x_at	235.455	1.57628	0.000273251	UP	LILRA2
211108_s_at	21.7724	1.25963	0.0291077	UP	JAK3
211121_s_at	461.159	0.632092	0.00174635	NOT	DOK1
211122_s_at	577.952	4.44931	7.85e-11	UP	CXCL11
211126_s_at	599.025	1.06163	0.00190912	UP	CSRP2
211211_x_at	66.5665	1.88161	0.00160276	UP	SH2D1A
211224_s_at	71.5847	-2.10154	0.000327283	DOWN	ABCB11
211256_x_at	496.118	0.675536	1.25e-05	NOT	BTN2A1
211302_s_at	657.283	1.79271	0.000220809	UP	PDE4B
211322_s_at	43.3934	-1.56132	4.77e-05	DOWN	SARDH
211340_s_at	1433.26	1.31131	3.92e-05	UP	MCAM
211366_x_at	4492.57	1.49088	1.7e-09	UP	CASP1
211367_s_at	1944.69	1.66981	3.44e-09	UP	CASP1
211368_s_at	3420.96	1.3994	1.56e-08	UP	CASP1
211372_s_at	1486.34	-1.12697	0.0135046	DOWN	IL1R2
211380_s_at	44.9524	-1.11823	0.0174913	DOWN	PRKG1
211389_x_at	39.1954	-1.11744	0.000951269	DOWN	KIR3DS1
211445_x_at	6305.63	-1.05683	0.000581772	DOWN	NACAP1
211458_s_at	1190.73	0.724638	0.0367863	NOT	GABARAPL1
211474_s_at	4615.79	0.584578	0.0137155	NOT	SERPINB6
211495_x_at	1248.74	0.903485	0.000951269	NOT	TNFSF12-TNFSF13
211506_s_at	2437.05	3.9928	2.98e-06	UP	CXCL8
211564_s_at	184.788	3.25664	5.77e-08	UP	PDLIM4
211573_x_at	324.401	1.53661	0.000615319	UP	TGM2
211636_at	112.061	1.617	0.0110285	UP	IGHA1
211654_x_at	3091.65	1.28514	0.000807092	UP	HLA-DQB1
211667_x_at	54.5718	-1.25532	0.0426386	DOWN	TRAV12-2
211668_s_at	1631.33	2.57266	1.68e-06	UP	PLAU
211695_x_at	1433.21	1.54686	0.000781922	UP	MUC1
211734_s_at	219.651	-1.15619	0.00665979	DOWN	FCER1A
211737_x_at	555.24	-1.04076	0.0179709	DOWN	PTN
211756_at	47.1201	2.42703	0.00671209	UP	PTHLH
211780_x_at	1362.17	0.495615	0.000475036	NOT	DCTN1
211798_x_at	6198.73	1.32729	0.0140193	UP	IGLJ3
211936_at	12866.7	0.581283	0.000340027	NOT	HSPA5
211959_at	5087.52	2.64857	1.12e-12	UP	IGFBP5
211964_at	5998.6	1.60846	4.6e-06	UP	COL4A2
211966_at	2589.23	1.69907	0.000150271	UP	COL4A2
211980_at	7100.39	1.96797	6.63e-08	UP	COL4A1
211981_at	2568.72	2.29536	4.25e-07	UP	COL4A1
212000_at	194.396	-0.616189	0.0199281	NOT	SUGP2
212010_s_at	4598.18	0.812081	7.96e-07	NOT	CDV3
212014_x_at	2049.18	1.26414	0.00055289	UP	CD44
212067_s_at	3081.33	1.49137	4.92e-07	UP	C1R
212090_at	1710.3	1.33284	0.000337272	UP	GRINA
212097_at	3108.36	1.14317	0.000215628	UP	CAV1
212127_at	672.945	0.623762	0.0403437	NOT	RANGAP1
212187_x_at	2722.09	2.22179	2.22e-05	UP	PTGDS
212203_x_at	12412	1.83955	6.79e-11	UP	IFITM3
212239_at	1404.67	-0.448339	0.0227021	NOT	PIK3R1
212240_s_at	1386.26	-0.558021	0.0291767	NOT	PIK3R1
212245_at	1717.3	0.870213	8.95e-05	NOT	MCFD2
212262_at	515.046	1.11054	0.000289233	UP	QKI
212265_at	1567.6	1.03323	0.000283868	UP	QKI
212274_at	459.726	0.908832	0.000144244	NOT	LPIN1
212276_at	1049.21	0.996497	7.54e-08	NOT	LPIN1
212285_s_at	1852.76	0.826268	0.000359152	NOT	AGRN
212290_at	1145.59	0.826944	0.00145596	NOT	SLC7A1
212312_at	1261.14	0.828575	0.00350477	NOT	BCL2L1
212334_at	2667.24	0.605514	0.0264734	NOT	GNS
212338_at	5031.59	-0.955333	0.00143422	NOT	MYO1D
212345_s_at	3283.46	0.89645	1.33e-07	NOT	CREB3L2
212347_x_at	593.743	0.695698	0.000146977	NOT	MIR4800
212350_at	1320.53	0.771303	0.00015676	NOT	TBC1D1
212360_at	977.256	0.697516	0.00413771	NOT	AMPD2
212378_at	1072.82	0.730654	0.00198131	NOT	GART
212387_at	1341	0.903225	0.000340312	NOT	TCF4
212414_s_at	872.137	1.21019	0.000450455	UP	GLYR1
212415_at	458.734	1.46304	8.53e-05	UP	2019
212417_at	812.64	-0.495459	0.035855	NOT	SCAMP1
212419_at	871.644	1.07157	2.68e-05	UP	ZCCHC24
212458_at	1425.58	-0.671148	0.000735235	NOT	SPRED2
212481_s_at	2087.29	0.958477	0.000426102	NOT	TPM4
212522_at	2560.06	-0.81035	0.000411865	NOT	PDE8A
212527_at	976.091	0.755709	0.000424665	NOT	DESI1
212531_at	16825.2	3.51214	2.33e-16	UP	LCN2
212570_at	853.093	-1.01106	0.00781504	DOWN	ENDOD1
212573_at	2123.68	-0.839706	0.0306682	NOT	ENDOD1
212587_s_at	2140.81	1.5631	8.69e-05	UP	PTPRC
212593_s_at	7422.42	-1.05277	0.00102297	DOWN	MIR4680
212594_at	2248.38	-1.20584	0.00486679	DOWN	MIR4680
212624_s_at	587.2	2.92568	2.59e-07	UP	CHN1
212641_at	375.305	1.04513	0.000128302	UP	HIVEP2
212642_s_at	679.237	1.06517	6.7e-06	UP	HIVEP2
212646_at	1999.89	1.35914	2.77e-06	UP	RFTN1
212655_at	1248.63	-0.569024	0.0327763	NOT	ZCCHC14
212657_s_at	2386.87	4.47592	2.36e-09	UP	IL1RN
212687_at	2882.34	0.732745	0.00941648	NOT	LIMS1
212701_at	323.59	-1.07163	0.000635575	DOWN	TLN2
212707_s_at	309.411	1.09017	0.000475772	UP	LOC102725198
212733_at	863.19	0.504343	0.00462112	NOT	KIAA0226
212756_s_at	841.424	0.467912	0.0344067	NOT	UBR2
212768_s_at	17086.8	2.04798	0.000124053	UP	OLFM4
212769_at	314.911	0.735043	0.0097337	NOT	TLE3
212771_at	2569.57	-0.526931	0.0262792	NOT	FAM171A1
212812_at	4459.57	-0.584743	0.0152764	NOT	SERINC5
212822_at	459.525	0.857417	0.000678291	NOT	HEG1
212863_x_at	4329.38	-0.439571	0.00451351	NOT	CTBP1
212864_at	759.325	0.47463	0.00903194	NOT	CDS2
212902_at	730.535	0.846303	1.42e-06	NOT	SEC24A
212912_at	911.372	1.08991	2.94e-08	UP	RPS6KA2
212923_s_at	570.531	0.982907	9.94e-05	NOT	PXDC1
212950_at	611.218	1.44174	0.00019145	UP	GPR116
212989_at	849.141	0.804832	0.000320708	NOT	SGMS1
212992_at	311.873	1.22612	0.0219852	UP	AHNAK2
212998_x_at	3092.38	1.08716	0.00843547	UP	HLA-DQB1
213001_at	1504.23	1.68689	3.41e-05	UP	ANGPTL2
213004_at	657.299	1.7084	3.66e-05	UP	ANGPTL2
213010_at	479.734	1.12166	0.00316739	UP	PRKCDBP
213030_s_at	927.92	-0.610081	0.0123878	NOT	PLXNA2
213060_s_at	359.616	1.64534	0.00188083	UP	CHI3L2
213069_at	833.021	1.37445	5.34e-07	UP	HEG1
213091_at	148.669	-1.00461	0.0184389	DOWN	CRTC1
213094_at	929.564	1.74342	3.46e-05	UP	GPR126
213138_at	352.928	1.01859	0.00275319	UP	ARID5A
213142_x_at	683.243	0.722586	0.0400059	NOT	GSAP
213155_at	305.417	-1.8838	0.0136692	DOWN	LOC339166
213157_s_at	189.684	-1.11764	0.000588184	DOWN	LOC339166
213169_at	960.118	-0.834854	0.00386392	NOT	SEMA5A
213172_at	81.2711	1.99267	0.00480445	UP	TTC9
213194_at	874.002	1.60754	1.46e-07	UP	ROBO1
213238_at	580.4	0.803195	6.04e-05	NOT	ATP10D
213264_at	1042.25	-0.856125	0.00215322	NOT	PCBP2
213293_s_at	2323.73	1.36015	3.74e-09	UP	TRIM22
213306_at	209.421	1.28449	1.86e-05	UP	MPDZ
213338_at	1923.59	3.11767	3.87e-09	UP	TMEM158
213358_at	333.227	1.51061	1.8e-06	UP	MTCL1
213369_at	490.824	-2.56983	0.000330044	DOWN	CDHR1
213380_x_at	568.271	-1.4007	0.015117	DOWN	LOC101930052
213407_at	1798.56	-1.2693	0.000735444	DOWN	PHLPP2
213425_at	1382.25	2.02881	2.54e-05	UP	WNT5A
213428_s_at	7043.69	1.29848	0.000322985	UP	COL6A1
213429_at	327.532	1.02979	0.00349046	UP	BICC1
213435_at	4574.12	-1.13402	0.00814705	DOWN	SATB2
213478_at	611.354	0.644773	0.0263451	NOT	KAZN
213537_at	935.387	1.19557	0.0107281	UP	HLA-DPA1
213541_s_at	225.816	0.888055	0.000287412	NOT	ERG
213568_at	236.577	1.39867	0.00641067	UP	OSR2
213570_at	323.397	-0.426888	0.0200815	NOT	EIF4E2
213592_at	548.003	2.25667	3.87e-08	UP	APLNR
213618_at	700.679	0.661403	0.000228327	NOT	ARAP2
213620_s_at	1463.35	1.42585	4.24e-07	UP	ICAM2
213680_at	910.389	3.25023	1.66e-05	UP	KRT6B
213689_x_at	1139.61	0.712965	0.000140435	NOT	FAM69A
213706_at	84.9173	1.91072	0.0177178	UP	GPD1
213710_s_at	969.004	-1.24726	0.00734077	DOWN	CALM1
213715_s_at	50.1124	1.24023	0.0174718	UP	KANK3
213724_s_at	364.028	-1.03252	0.00204463	DOWN	PDK2
213779_at	672.769	0.754978	0.00124019	NOT	EMID1
213817_at	307.494	1.72962	6.47e-05	UP	IRAK3
213832_at	555.891	2.21754	2.75e-09	UP	KCND3
213839_at	1613.87	-1.12883	0.00355086	DOWN	CLMN
213852_at	1546.27	-0.373822	0.0405222	NOT	RBM8A
213857_s_at	4547.36	0.826132	5.3e-05	NOT	CD47
213869_x_at	843.99	1.6277	8.97e-06	UP	THY1
213915_at	541.88	1.73523	0.000228327	UP	NKG7
213929_at	960.757	-1.54536	4.96e-05	DOWN	EXPH5
213958_at	639.958	1.11313	0.00930841	UP	CD6
213962_s_at	40.2194	-1.10806	0.0436277	DOWN	ANKLE2
213997_at	171.869	-2.16169	0.00031568	DOWN	FAM189A1
214005_at	421.345	0.593734	0.0244303	NOT	GGCX
214022_s_at	12049	1.46379	2.11e-07	UP	IFITM1
214084_x_at	513.368	1.47849	0.00023616	UP	NCF1
214121_x_at	243.429	1.25615	0.0064002	UP	PDLIM7
214219_x_at	153.653	2.47838	0.000197296	UP	MAP4K1
214240_at	277.989	1.79152	0.000337112	UP	GAL
214249_at	109.68	-1.58687	0.0167179	DOWN	TRIM2
214250_at	104.821	-1.43893	0.00957436	DOWN	NUMA1
214262_at	37.37	1.28532	0.00271788	UP	MIR6875
214267_s_at	27.8484	-1.25884	0.0283627	DOWN	CADM4
214279_s_at	911.829	-1.11951	0.00968419	DOWN	NDRG2
214290_s_at	2641.79	1.43417	6.75e-06	UP	HIST2H2AA3
214362_at	67.64	-1.03372	0.0308783	DOWN	RGS12
214366_s_at	226.582	0.788237	0.0309081	NOT	ALOX5
214370_at	171.005	5.68359	1.68e-10	UP	S100A8
214388_at	92.7796	-1.26769	0.00670693	DOWN	---
214433_s_at	11274.7	-1.47443	0.00510672	DOWN	SELENBP1
214438_at	470.63	1.53707	2.65e-06	UP	HLX
214446_at	278.66	1.88111	2.23e-06	UP	ELL2
214456_x_at	620.321	5.59807	3.52e-15	UP	SAA1
214493_s_at	95.4446	-1.16761	0.00847681	DOWN	INADL
214511_x_at	421.097	2.31062	2.34e-07	UP	FCGR1B
214542_x_at	163.603	-0.803161	0.00577432	NOT	HIST1H2AG
214574_x_at	913.27	1.39334	8.89e-08	UP	LST1
214594_x_at	1084.38	-0.78688	0.00406053	NOT	ATP8B1
214598_at	1692.27	-3.55508	0.00154399	DOWN	CLDN8
214617_at	759.319	1.29162	0.00109245	UP	PRF1
214730_s_at	2905.01	0.669211	0.000328061	NOT	GLG1
214734_at	1664.51	-1.59562	1.21e-05	DOWN	EXPH5
214800_x_at	9278.13	-0.551705	0.00709231	NOT	BTF3
214815_at	84.5232	-1.05786	0.0148947	DOWN	TRIM33
214832_at	81.9701	-1.29759	0.0265495	DOWN	HNF4A
214838_at	527.92	0.577594	0.00072958	NOT	SFT2D2
214845_s_at	964.258	1.25283	2.14e-05	UP	CALU
214866_at	777.803	1.28053	0.000123019	UP	PLAUR
214900_at	253.197	-0.852962	0.0035281	NOT	ZKSCAN1
214974_x_at	3296.68	6.22611	1.85e-15	UP	CXCL5
215014_at	215.513	3.12365	1.31e-15	UP	KCND3
215018_at	32.2246	-1.31185	0.0426386	DOWN	KIAA1731
215028_at	409.362	-1.2363	0.0463039	DOWN	SEMA6A
215034_s_at	2136.2	1.99855	3.23e-05	UP	TM4SF1
215035_at	102.72	2.37669	0.000255691	UP	IGLV6-57
215051_x_at	1226.53	1.29799	0.000223878	UP	AIF1
215067_x_at	348.1	-1.06592	0.000709507	DOWN	PRDX2
215076_s_at	17773.1	0.965317	0.00233534	NOT	COL3A1
215078_at	95.8888	3.69888	5.36e-08	UP	LOC100129518
215101_s_at	814.567	4.41906	2.02e-06	UP	CXCL5
215162_at	167.416	-0.821305	0.0321178	NOT	RALGAPA1
215185_at	73.2905	2.18561	0.000271964	UP	LINC00963
215223_s_at	2795.98	2.50137	1.19e-06	UP	LOC100129518
215235_at	2144.83	0.443045	0.0323119	NOT	SPTAN1
215270_at	78.483	-1.27185	0.0346318	DOWN	LFNG
215280_s_at	283.299	-0.65768	0.00766603	NOT	PPFIA3
215285_s_at	186.497	0.65267	0.00404792	NOT	PHTF1
215300_s_at	233.753	-1.27146	0.0283459	DOWN	FMO5
215305_at	82.4451	2.36935	0.000383524	UP	PDGFRA
215321_at	216.278	-1.18447	0.00209364	DOWN	RUNDC3B
215346_at	408.677	1.48954	2.59e-05	UP	CD40
215363_x_at	292.985	3.88564	1.05e-06	UP	FOLH1
215403_at	35.3127	-1.06247	0.0320097	DOWN	---
215483_at	257.559	-1.07219	0.0307259	DOWN	AKAP9
215485_s_at	476.241	1.03046	0.0058756	UP	ICAM1
215522_at	17.223	-1.78889	0.00325581	DOWN	SORCS3
215563_s_at	263.887	-1.72167	0.0284186	DOWN	MST1L
215591_at	233.031	-2.12044	5.27e-08	DOWN	SATB2
215599_at	255.74	-1.0428	0.0289663	DOWN	GUSBP3
215619_at	11.3381	-1.4512	0.0401644	DOWN	---
215628_x_at	577.785	-0.447523	0.0350907	NOT	---
215650_at	13.9904	-1.53306	0.0119136	DOWN	---
215657_at	766.919	-1.8859	0.00633327	DOWN	SLC26A3
215658_at	156.786	-1.76058	6.62e-05	DOWN	LINC00675
215660_s_at	324.502	-1.22315	0.000116642	DOWN	MAST2
215706_x_at	2135.97	1.38394	1.47e-05	UP	ZYX
215743_at	169.457	-0.735943	0.016326	NOT	NMT2
215768_at	71.0974	0.869604	0.00803557	NOT	---
215824_at	27.8544	-1.02639	0.0346308	DOWN	---
215836_s_at	1045.16	0.845965	0.0100614	NOT	PCDHGA1
215894_at	461.329	-1.50724	0.00706579	DOWN	PTGDR
215921_at	230.203	-1.71732	0.000234238	DOWN	NPIPA5
215925_s_at	211.225	2.16343	8.76e-05	UP	CD72
215929_at	10.0449	2.34943	0.00409488	UP	LINC00837
216038_x_at	716.295	0.561728	0.0383115	NOT	DAXX
216044_x_at	1050.26	0.512593	0.00791685	NOT	FAM69A
216050_at	77.952	-1.42994	0.0266372	DOWN	---
216094_at	127.295	-1.00997	0.0175033	DOWN	---
216103_at	136.936	-1.35605	0.00104866	DOWN	ACOT11
216129_at	222.939	-1.22398	0.00258274	DOWN	ATP9A
216147_at	53.776	-1.20536	0.0282299	DOWN	---
216250_s_at	1699.98	0.722657	0.0283592	NOT	LPXN
216325_x_at	327.156	2.61631	8.1e-08	UP	RTEL1
216331_at	191.844	1.70844	0.00463476	UP	ITGA7
216439_at	33.914	-1.05698	0.0393136	DOWN	TNK2
216468_s_at	19.2467	-1.43239	0.0272556	DOWN	ZNF682
216517_at	497.068	1.66933	2.47e-05	UP	IGKC
216541_x_at	1827.98	2.23476	0.00278471	UP	IGHG1
216565_x_at	1703.27	1.06008	9.67e-05	UP	RP4-781L3.1
216708_x_at	161.976	1.2576	0.0168433	UP	---
216775_at	49.3062	-1.49716	0.00121911	DOWN	USP53
216794_at	26.4666	-1.1037	0.0397165	DOWN	---
216841_s_at	1393.47	2.36832	2.29e-06	UP	LOC100129518
216910_at	257.594	-1.27025	0.0171415	DOWN	XPNPEP2
216928_at	50.2881	-1.53216	0.00909069	DOWN	TAL1
216950_s_at	408.007	2.1043	9.96e-07	UP	FCGR1A
217027_x_at	470.992	0.766219	0.00621765	NOT	AC004941.5
217028_at	2206.22	1.5148	0.00223148	UP	CXCR4
217067_s_at	21.941	-1.48808	0.00443884	DOWN	DMP1
217118_s_at	1192.02	1.11113	1.02e-07	UP	KIAA0930
217154_s_at	228.27	-1.17351	0.03263	DOWN	EDN3
217184_s_at	148.045	-1.7189	0.000712264	DOWN	LTK
217281_x_at	5219.62	1.32075	0.0181746	UP	IGH
217299_s_at	522.715	0.669707	0.00140862	NOT	NBN
217312_s_at	337.259	1.5298	0.0117187	UP	COL7A1
217387_at	29.0804	-1.48003	0.0312621	DOWN	CAPN6
217388_s_at	995.337	3.64775	2.49e-11	UP	KYNU
217430_x_at	1903.43	2.26893	0.000120825	UP	COL1A1
217456_x_at	5318.46	0.526668	0.0112898	NOT	HLA-E
217459_at	31.849	-1.08949	0.0220615	DOWN	---
217469_at	58.6538	1.62563	0.00219222	UP	IGH
217478_s_at	3714.41	1.39617	1.64e-08	UP	HLA-DMA
217506_at	694.592	-1.08859	9.03e-05	DOWN	---
217540_at	122.244	0.787343	0.0360336	NOT	NXPE3
217541_x_at	332.743	-0.548802	0.0143566	NOT	ZNF816
217552_x_at	170.174	2.2927	2.46e-07	UP	CR1
217655_at	124.369	1.1957	0.00340452	UP	LOC100127972
217684_at	42.7074	-1.46942	0.00348935	DOWN	TYMS
217752_s_at	4011.58	0.464788	0.0091235	NOT	CNDP2
217763_s_at	1442.18	2.09516	9.25e-05	UP	RAB31
217764_s_at	2290.57	1.40413	0.000140224	UP	RAB31
217787_s_at	653.255	0.899398	0.000510568	NOT	GALNT2
217788_s_at	2344.62	0.757271	0.00930502	NOT	GALNT2
217813_s_at	994.463	-0.547725	0.00469985	NOT	SPIN1
217825_s_at	1706.13	0.460961	0.0132078	NOT	UBE2J1
217827_s_at	3142.66	0.708888	0.000511462	NOT	SPG21
217867_x_at	3571.89	1.75345	2.38e-06	UP	BACE2
217875_s_at	347.92	1.39884	0.000309778	UP	PMEPA1
217877_s_at	2223.89	-0.423124	0.0312626	NOT	GPBP1L1
217904_s_at	410.652	1.06591	7.19e-05	UP	BACE1
217911_s_at	2378.16	0.968679	0.00111298	NOT	BAG3
217922_at	1964.89	0.473358	0.00145614	NOT	MAN1A2
217925_s_at	727.271	0.86139	0.000162233	NOT	C6orf106
217937_s_at	179.542	1.25986	0.00340452	UP	HDAC7
217962_at	6601.16	0.424713	0.0153442	NOT	NOP10
217966_s_at	421.379	1.60469	1.21e-05	UP	FAM129A
217996_at	2007.07	2.10446	9.48e-05	UP	PHLDA1
218060_s_at	453.619	0.544663	0.040147	NOT	USB1
218070_s_at	654.459	0.493205	0.00364685	NOT	GMPPA
218100_s_at	1163.77	-0.50306	0.00573669	NOT	IFT57
218107_at	2423.22	0.381425	0.0125341	NOT	WDR26
218136_s_at	635.68	0.680989	0.0161581	NOT	SLC25A37
218140_x_at	2771.36	0.600718	0.00984599	NOT	SRPRB
218187_s_at	1305.97	-0.846243	0.0188612	NOT	C8orf33
218198_at	2092.98	-0.527683	0.0278914	NOT	DHX32
218218_at	1949.17	-1.00359	0.00726892	DOWN	APPL2
218231_at	1772.63	0.786655	0.000176075	NOT	NAGK
218257_s_at	689.604	0.835948	2.56e-06	NOT	UGGT1
218280_x_at	1176.18	0.772402	0.00124487	NOT	HIST2H2AA3
218295_s_at	379.703	0.844426	0.000393643	NOT	NUP50
218296_x_at	284.661	0.659865	0.0313133	NOT	MSTO1
218309_at	10712.9	-1.24514	5.18e-05	DOWN	CAMK2N1
218350_s_at	2540.69	-0.737434	0.0127452	NOT	GMNN
218353_at	2173.58	1.41132	2.19e-05	UP	RGS5
218358_at	3965	1.40771	1.05e-07	UP	CRELD2
218459_at	1297.85	0.59356	0.000713083	NOT	TOR3A
218468_s_at	1900.02	2.97908	5.73e-08	UP	GREM1
218469_at	1818.2	2.4471	4.87e-07	UP	GREM1
218476_at	308.22	-0.429019	0.00741359	NOT	POMT1
218600_at	210.447	2.0751	3.56e-08	UP	LIMD2
218613_at	613.771	-0.669356	0.00387781	NOT	PSD3
218627_at	1230.57	1.38036	8.09e-09	UP	DRAM1
218656_s_at	790.196	0.894304	0.000100033	NOT	LHFP
218657_at	912.776	-1.46186	0.0458722	DOWN	RAPGEFL1
218660_at	852.196	1.45008	2.06e-05	UP	DYSF
218699_at	736.307	1.04414	0.00103442	UP	RAB29
218700_s_at	430.155	1.24176	0.000130907	UP	RAB29
218723_s_at	1101.43	1.71003	4.36e-08	UP	RGCC
218736_s_at	226.118	1.65785	9.83e-07	UP	PALMD
218756_s_at	3491.25	-1.36712	0.00544604	DOWN	DHRS11
218780_at	820.17	-0.658987	0.00435962	NOT	HOOK2
218802_at	987.621	1.02974	2.33e-06	UP	CCDC109B
218806_s_at	1145.32	-1.10769	0.000958174	DOWN	VAV3
218807_at	2810.43	-1.11162	0.00184239	DOWN	VAV3
218810_at	1647.01	2.25102	9.44e-11	UP	MIR6732
218812_s_at	677.482	1.4559	5.25e-05	UP	ORAI2
218834_s_at	436.187	1.37728	0.00713686	UP	TMEM132A
218844_at	477.59	-1.36265	6.83e-05	DOWN	ACSF2
218854_at	864.317	1.25705	0.000998951	UP	DSE
218880_at	968.118	0.969688	0.00121045	NOT	FOSL2
218885_s_at	3611.31	-1.10205	0.015601	DOWN	GALNT12
218900_at	1594.77	-0.874401	0.0306546	NOT	CNNM4
218941_at	482.308	0.290157	0.0361317	NOT	FBXW2
218952_at	450.536	-1.20136	0.0209904	DOWN	PCSK1N
218971_s_at	79.5513	1.89976	0.00250055	UP	WDR91
218975_at	257.779	4.05519	8.15e-07	UP	COL5A3
218977_s_at	311.142	0.824989	1.26e-05	NOT	TRNAU1AP
218978_s_at	154.577	1.35014	0.000186907	UP	SLC25A37
219049_at	493.54	2.15967	1.67e-05	UP	CSGALNACT1
219055_at	638.862	0.603037	0.000634411	NOT	SRBD1
219070_s_at	599.92	0.457811	0.00609769	NOT	MOSPD3
219076_s_at	2054.87	-1.19288	0.000225483	DOWN	PXMP2
219087_at	544.555	1.08797	0.00108299	UP	ASPN
219117_s_at	6847.44	1.49576	7.73e-08	UP	FKBP11
219118_at	3474.55	1.74654	2.99e-08	UP	FKBP11
219134_at	378.034	1.70795	3.4e-06	UP	ELTD1
219155_at	1043.4	1.27818	8.49e-07	UP	PITPNC1
219174_at	494.144	-0.753702	0.00447799	NOT	IFT74
219180_s_at	996.58	-0.647852	0.0315157	NOT	PEX26
219181_at	801.062	1.50337	1.48e-06	UP	LIPG
219195_at	358.254	-1.39656	5.18e-05	DOWN	PPARGC1A
219210_s_at	373.986	0.85845	0.000768154	NOT	RAB8B
219211_at	298.732	0.845035	0.00213752	NOT	USP18
219249_s_at	227.706	2.51387	7.88e-05	UP	FKBP10
219256_s_at	395.412	0.818387	0.00215788	NOT	SH3TC1
219257_s_at	359.288	1.80509	0.000123777	UP	SPHK1
219267_at	628.424	-0.560965	0.000316458	NOT	GLTP
219270_at	295.192	3.41346	5.01e-11	UP	CHAC1
219282_s_at	514.623	1.09339	0.000141101	UP	TRPV2
219297_at	723.579	1.15381	6.66e-06	UP	WDR44
219312_s_at	269.45	-0.724362	0.00749307	NOT	ZBTB10
219349_s_at	372.822	0.508525	0.0211593	NOT	EXOC2
219368_at	137.701	-1.34899	0.00215347	DOWN	NAP1L2
219371_s_at	1624.63	1.42552	0.000108073	UP	KLF2
219402_s_at	2597.73	0.861347	7.03e-06	NOT	DERL1
219403_s_at	920.247	1.23789	0.000440567	UP	HPSE
219410_at	856.433	1.60792	6.39e-05	UP	TMEM45A
219412_at	138.565	2.22981	8.05e-06	UP	RAB38
219418_at	1193.41	-0.963699	1.16e-05	NOT	NHEJ1
219424_at	158.747	1.95223	6.07e-05	UP	EBI3
219434_at	497.267	4.8657	5.82e-08	UP	TREM1
219500_at	277.468	0.745186	0.0061776	NOT	CLCF1
219506_at	1054.25	1.17654	0.000100994	UP	C1orf54
219522_at	241.989	1.79907	2.17e-05	UP	FJX1
219551_at	821.025	0.686974	0.0355805	NOT	EAF2
219569_s_at	246.57	0.728486	0.00815537	NOT	SLC35G2
219620_x_at	1223.52	0.617522	0.0108829	NOT	TOR4A
219630_at	5453.29	2.61164	2.59e-06	UP	PDZK1IP1
219684_at	605.676	0.998169	0.000113266	NOT	RTP4
219690_at	561.871	1.12537	0.000125091	UP	IGFLR1
219693_at	214.04	2.00958	0.000299098	UP	AGPAT4
219701_at	30.4763	2.04752	0.00015991	UP	TMOD2
219704_at	714.617	-1.05732	0.0170876	DOWN	YBX2
219727_at	7256.63	5.07813	1.07e-12	UP	DUOX2
219730_at	19.102	-1.92085	0.00770355	DOWN	LOC100996782
219795_at	1975.14	5.89822	1.21e-13	UP	SLC6A14
219836_at	96.4803	2.20876	6.06e-05	UP	ZBED2
219862_s_at	1045.5	0.624199	0.00377378	NOT	NARF
219871_at	84.6518	-1.05693	0.0310753	DOWN	KLF3-AS1
219884_at	305.515	1.63708	7.48e-07	UP	LHX6
219888_at	451.991	1.24696	0.000100894	UP	SPAG4
219911_s_at	1534.81	1.69763	0.00290819	UP	SLCO4A1
219919_s_at	449.67	-0.62379	0.000987273	NOT	SSH3
219920_s_at	1412.28	0.674568	0.00515228	NOT	AMIGO3
219935_at	311.007	1.4091	5.77e-06	UP	ADAMTS5
219937_at	194.568	-1.65996	0.00970265	DOWN	TRHDE
219947_at	487.868	1.54	2.22e-05	UP	CLEC4A
219948_x_at	1156.74	-2.04429	0.0305365	DOWN	UGT2A3
219965_s_at	65.3007	-1.18093	0.0132006	DOWN	MAGIX
219971_at	103.005	2.88355	3.97e-05	UP	IL21R
219982_s_at	394.84	-0.63585	0.000117311	NOT	SERF1A
220027_s_at	342.076	1.4306	1.08e-06	UP	RASIP1
220041_at	1606.36	-1.44151	0.00124863	DOWN	PIGZ
220043_s_at	75.7442	-1.56033	0.00201913	DOWN	MFI2
220054_at	157.539	1.97738	3.84e-05	UP	IL23A
220062_s_at	62.8425	1.19062	0.00856611	UP	MAGEC2
220091_at	142.193	2.83051	1.57e-05	UP	SLC2A6
220118_at	36.9452	2.01382	1.45e-06	UP	ZBTB32
220125_at	55.3551	-1.17255	0.0499711	DOWN	DNAI1
220136_s_at	31.8146	-2.49109	0.00253137	DOWN	CRYBA2
220140_s_at	738.914	0.452191	0.0249522	NOT	SNX11
220161_s_at	6661.71	-1.17416	0.000857197	DOWN	EPB41L4B
220177_s_at	244.291	1.26636	0.00619927	UP	TMPRSS3
220187_at	78.6039	1.08616	0.0200393	UP	STEAP4
220310_at	844.605	-1.25351	0.0287166	DOWN	TUBAL3
220333_at	158.918	-1.62853	0.00441586	DOWN	PAQR5
220357_s_at	1015.88	-0.768524	0.0386463	NOT	SGK2
220377_at	123.563	2.15669	0.0015466	UP	KIAA0125
220423_at	173.944	4.11515	1.87e-07	UP	PLA2G2D
220495_s_at	2538.67	1.3068	3.26e-07	UP	TXNDC15
220567_at	37.0368	-1.71234	0.0029083	DOWN	IKZF2
220617_s_at	464.565	1.00346	0.0210604	UP	ZNF532
220622_at	972.018	-1.14148	0.0489814	DOWN	LRRC31
220655_at	573.288	5.5605	1.57e-13	UP	TNIP3
220658_s_at	282.294	1.76646	3.62e-06	UP	ARNTL2
220711_at	36.5977	-1.30467	0.0307875	DOWN	---
220723_s_at	883.321	-1.86007	0.0358984	DOWN	CWH43
220736_at	181.181	-1.1227	0.000110626	DOWN	SLC19A3
220750_s_at	594.564	0.723719	0.00458543	NOT	LEPRE1
220754_at	14.4298	-1.42582	0.0156319	DOWN	ARMC9
220786_s_at	120.833	-2.42985	0.00588246	DOWN	SLC38A4
220790_s_at	68.8085	-1.41228	0.0220424	DOWN	MS4A5
220806_x_at	143.689	-1.2772	0.0265837	DOWN	GNG13
220819_at	160.945	-2.34366	6.83e-09	DOWN	FRMD1
220902_at	34.855	-1.44095	0.00282244	DOWN	---
220975_s_at	594.4	0.859859	0.00806133	NOT	C1QTNF1
221003_s_at	39.7302	-1.26708	0.038411	DOWN	CAB39L
221011_s_at	1644.22	1.16031	0.000319433	UP	LBH
221012_s_at	1766.44	0.652946	0.000327662	NOT	TRIM8
221036_s_at	464.567	1.03714	1.56e-05	UP	APH1B
221039_s_at	479.719	0.945085	0.0010365	NOT	ASAP1
221058_s_at	846.678	0.830791	0.000110914	NOT	CKLF
221095_s_at	45.3371	-1.3407	0.00372504	DOWN	KCNE2
221102_s_at	401.241	-2.36997	1.18e-05	DOWN	TRPM6
221134_at	44.8601	-1.09347	0.0499711	DOWN	ANGPT4
221178_at	102.457	-1.177	0.0253913	DOWN	BAIAP2L2
221218_s_at	1157.03	1.4063	4.12e-06	UP	TPK1
221221_s_at	196.905	0.911041	0.0286627	NOT	KLHL3
221245_s_at	3643.25	-1.04294	0.00201913	DOWN	FZD5
221259_s_at	56.5024	-1.4877	0.0231463	DOWN	TEX11
221286_s_at	2724.09	1.90277	0.000283868	UP	MZB1
221304_at	314.381	-1.56368	0.00342431	DOWN	UGT1A1
221305_s_at	794.674	-1.53919	0.0424573	DOWN	UGT1A1
221345_at	164.931	3.31739	3.86e-08	UP	FFAR2
221455_s_at	61.4415	1.2964	0.0143722	UP	LOC101929777
221462_x_at	72.2731	-1.37784	0.0173715	DOWN	KLK15
221463_at	480.444	1.07492	0.00572105	UP	CCL24
221470_s_at	14.6938	-1.81734	0.00848125	DOWN	IL37
221529_s_at	1840.36	1.17911	6.2e-05	UP	PLVAP
221538_s_at	739.528	1.73236	3.51e-07	UP	PLXNA1
221560_at	210.137	1.16164	0.00150486	UP	MARK4
221562_s_at	438.043	-0.578859	0.00780019	NOT	SIRT3
221563_at	555.792	1.09497	3.11e-05	UP	DUSP10
221581_s_at	550.668	1.47172	0.00141042	UP	LAT2
221597_s_at	2071.6	0.607541	0.00214043	NOT	TMEM208
221658_s_at	218.883	3.02196	7.78e-07	UP	IL21R
221667_s_at	406.386	0.793441	0.0395079	NOT	HSPB8
221675_s_at	3429.82	-0.833683	0.000450417	NOT	CHPT1
221676_s_at	2147.15	0.724768	0.0152929	NOT	CORO1C
221698_s_at	777.567	1.50407	0.000768154	UP	CLEC7A
221701_s_at	252.38	0.832328	0.00694711	NOT	STRA6
221729_at	3365.77	1.64851	6.06e-05	UP	COL5A2
221730_at	1739.76	1.73217	0.000913662	UP	COL5A2
221731_x_at	2720.74	1.41213	3.17e-05	UP	VCAN
221773_at	1518.58	1.28815	1.31e-05	UP	ELK3
221779_at	336.15	2.35104	3.39e-06	UP	MICALL1
221782_at	929.772	0.819847	0.00213776	NOT	DNAJC10
221795_at	251.633	-1.09734	0.027167	DOWN	NTRK2
221807_s_at	353.825	1.47231	0.00112426	UP	TRABD
221844_x_at	4489.24	0.535494	0.00119626	NOT	SPCS3
221870_at	509.806	3.09599	6.7e-06	UP	EHD2
221896_s_at	8410.33	-0.984656	0.00223545	NOT	HIGD1A
221898_at	589.16	3.14904	2.58e-10	UP	PDPN
221920_s_at	678.181	1.35417	9.2e-05	UP	SLC25A37
221927_s_at	1712.01	-0.612156	0.027354	NOT	ABHD11
221942_s_at	854.954	1.74011	3.38e-05	UP	GUCY1A3
221992_at	658.829	-1.16854	0.00192294	DOWN	NPIPB15
222062_at	308.622	1.41922	0.000389251	UP	IL27RA
222088_s_at	521.93	1.75401	0.00101987	UP	SLC2A14
222146_s_at	1042.16	0.70729	0.00282244	NOT	TCF4
222169_x_at	263.574	-0.773378	0.0335354	NOT	SH2D3A
222221_x_at	665.591	1.20205	0.00138381	UP	EHD1
222285_at	91.9773	2.19222	0.00791685	UP	IGHD
222288_at	422.361	-1.05869	0.02234	DOWN	---
222313_at	187.457	-1.22418	0.0248832	DOWN	---
222362_at	296.094	-0.873429	0.000475002	NOT	AGFG2
222411_s_at	5417.44	0.684483	2.38e-05	NOT	SSR3
222537_s_at	634.083	0.58923	0.00167426	NOT	CDC42SE1
222548_s_at	302.719	0.949114	0.00505046	NOT	MAP4K4
222596_s_at	60.9719	-1.04568	0.0458312	DOWN	LGR4
222620_s_at	5980.84	0.785874	2.81e-05	NOT	DNAJC1
222621_at	2028.56	0.863019	6.35e-06	NOT	DNAJC1
222646_s_at	2781.4	1.74615	4.03e-05	UP	ERO1L
222650_s_at	454.338	-0.61127	0.0219085	NOT	SLC2A4RG
222670_s_at	1072.29	0.96768	0.0017495	NOT	MAFB
222692_s_at	1242.76	0.915903	9.3e-05	NOT	FNDC3B
222725_s_at	53.3061	2.09421	2.35e-07	UP	PALMD
222749_at	218.036	1.00215	0.0137022	UP	SUFU
222753_s_at	1714.13	1.29786	5.93e-10	UP	SPCS3
222773_s_at	2101.09	-1.13128	0.0319384	DOWN	GALNT12
222802_at	1160.95	-0.776868	0.0230883	NOT	EDN1
222817_at	444.789	1.27	2.74e-06	UP	HSD3B7
222830_at	173.791	2.48204	7.4e-06	UP	GRHL1
222858_s_at	623.1	1.48344	8.15e-08	UP	DAPP1
222859_s_at	492.841	1.5201	2.37e-08	UP	DAPP1
222885_at	537.646	0.952653	0.00417315	NOT	EMCN
222904_s_at	2077.31	1.48078	0.000792597	UP	TMC5
222923_s_at	393.071	0.75067	0.0390978	NOT	KCNE3
222934_s_at	429.683	2.79068	6.2e-05	UP	CLEC4E
222957_at	314.354	-1.09878	0.0157282	DOWN	NEU4
222973_at	63.0144	-1.72988	2.52e-05	DOWN	---
223020_at	5197.98	0.550999	0.00457733	NOT	CLPTM1L
223025_s_at	490.774	0.985875	0.0001	NOT	AP1M1
223086_x_at	4833.33	0.437042	0.0146235	NOT	MRPL51
223093_at	541.038	-0.764019	3.15e-05	NOT	ANKH
223101_s_at	1090.8	0.488462	0.0183813	NOT	ARPC5L
223105_s_at	9481.74	-0.402019	0.000116749	NOT	TMEM14B
223144_s_at	1145.09	0.882996	0.00178952	NOT	AKIRIN2
223165_s_at	1745.89	-0.922904	3.11e-05	NOT	IP6K2
223168_at	1694.63	-1.02228	0.0022921	DOWN	RHOU
223194_s_at	2140.98	-1.02542	0.0056852	DOWN	SLC22A23
223217_s_at	4700.34	1.18132	1.91e-05	UP	NFKBIZ
223220_s_at	1377.84	1.56256	1.56e-11	UP	PARP9
223223_at	1640	-0.724165	0.000991574	NOT	ARV1
223290_at	899.993	-0.836856	1.84e-05	NOT	PDXP
223299_at	3001.11	0.944416	7.19e-09	NOT	SEC11C
223316_at	505.803	3.75982	7.96e-07	UP	CCDC3
223349_s_at	473.748	1.25124	8.69e-06	UP	BOK
223366_at	815.766	-1.29577	0.000192009	DOWN	ZNF704
223385_at	1200.07	-1.20334	0.00109387	DOWN	CYP2S1
223427_s_at	2011.81	-1.29636	0.000510832	DOWN	EPB41L4B
223447_at	11740.9	2.25495	0.00584201	UP	REG4
223451_s_at	1447.08	0.915003	4.6e-06	NOT	CKLF
223452_s_at	633.998	0.615046	0.0197386	NOT	ATL3
223501_at	889.095	1.33441	5.46e-07	UP	TNFSF13B
223502_s_at	833.307	1.84244	7.37e-08	UP	TNFSF13B
223503_at	260.688	2.06674	1.08e-05	UP	TMEM163
223512_at	488.068	0.416133	0.0142034	NOT	SAR1B
223533_at	128.465	1.77206	1.9e-07	UP	LOC101927933
223538_at	1570.6	-1.22931	7.59e-08	DOWN	SERF1A
223539_s_at	906.557	-1.44297	3.23e-08	DOWN	SERF1A
223553_s_at	955.51	1.77263	1.1e-05	UP	DOK3
223557_s_at	43.6284	-1.63903	0.02433	DOWN	TMEFF2
223562_at	532.14	1.4953	8.41e-05	UP	PARVG
223586_at	359.532	2.09734	1.74e-07	UP	ARNTL2
223587_s_at	780.89	-1.94221	0.00185304	DOWN	AMN
223591_at	1082.54	-0.399347	0.00857307	NOT	RNF135
223592_s_at	1793.31	-0.457602	0.0083011	NOT	RNF135
223600_s_at	18.314	-1.0167	0.0283078	DOWN	KIAA1683
223602_at	529.985	-0.791458	1.51e-06	NOT	USP30
223618_at	80.7938	-1.3925	0.0149788	DOWN	FMN2
223657_at	319.801	2.07938	5.38e-09	UP	FAM167B
223686_at	663.389	1.43827	6.36e-05	UP	TPK1
223754_at	1281.97	-1.15683	0.0489495	DOWN	C2orf88
223757_at	433.516	-2.08039	1.69e-05	DOWN	DIO3OS
223786_at	22.384	-1.29404	0.0327603	DOWN	CHST6
223791_at	65.1254	1.59464	0.000629114	UP	FAM27B
223834_at	250.929	1.0096	0.000118867	UP	CD274
223849_s_at	605.855	0.584146	0.000216244	NOT	MOV10
223897_at	33.6068	-1.3539	0.0493569	DOWN	ZNF765
223903_at	241.496	0.678858	0.0256816	NOT	TLR9
223921_s_at	904.484	-0.51052	0.000245912	NOT	GBA2
223935_at	51.8381	-1.59897	0.0172814	DOWN	TRPM5
223987_at	180.804	2.58509	8.45e-06	UP	CHRDL2
223991_s_at	512.28	0.770777	8.28e-05	NOT	GALNT2
224028_at	9.48631	-1.44383	0.0341514	DOWN	CPA6
224198_at	38.4107	-1.06469	0.0251243	DOWN	CELA1
224221_s_at	435.12	-1.63199	0.00080618	DOWN	VAV3
224329_s_at	77.6074	-1.42983	0.0435143	DOWN	CNFN
224342_x_at	4984.27	1.24528	0.0211106	UP	BMS1P20
224345_x_at	7445.64	-0.877514	0.000661765	NOT	FAM162A
224397_s_at	86.9353	1.6794	0.000209113	UP	TMTC1
224404_s_at	494.542	2.09622	2.94e-05	UP	FCRL5
224412_s_at	1476.9	-2.72454	0.000184075	DOWN	TRPM6
224413_s_at	1856.47	0.695108	0.00017838	NOT	TM2D2
224414_s_at	426.401	1.51192	1.54e-06	UP	CARD6
224498_x_at	136.415	-1.42403	0.0475408	DOWN	AXIN2
224520_s_at	42.3199	1.52711	0.018325	UP	BEST3
224559_at	1773.44	-1.20711	0.00133251	DOWN	MALAT1
224628_at	4695.44	0.536166	0.00262125	NOT	ERLEC1
224657_at	2232.21	1.01273	0.0221749	UP	ERRFI1
224659_at	1031.64	0.53608	0.0178487	NOT	SEPN1
224674_at	1516.34	1.01208	0.00251153	UP	TTYH3
224701_at	1352.97	1.69667	1.37e-12	UP	PARP14
224724_at	3170.87	0.752626	0.0185419	NOT	SULF2
224739_at	3029.49	1.42161	4.36e-08	UP	PIM3
224791_at	1566.29	1.21173	0.000561515	UP	ASAP1
224796_at	1100.19	0.998537	0.00173048	NOT	ASAP1
224820_at	1759.34	-0.539173	0.015914	NOT	COX20
224826_at	1128.28	0.878061	0.0196945	NOT	GPCPD1
224831_at	1012.73	0.735777	0.00116391	NOT	CPEB4
224860_at	255.612	-0.659609	0.00193974	NOT	TMEM261
224865_at	1095.37	-0.660274	0.00248813	NOT	FAR1
224871_at	3510.18	-0.490133	0.030362	NOT	TPRG1L
224923_at	551.191	0.649214	0.000173117	NOT	TTC7A
224927_at	1709.22	1.84633	4.99e-07	UP	PPP1R18
224928_at	2571.81	0.627116	0.00564502	NOT	SETD7
224951_at	997.167	0.513869	0.00363434	NOT	CERS5
224955_at	1745.36	0.635172	0.000450455	NOT	TEAD1
224959_at	12304.5	-1.77737	0.000972954	DOWN	SLC26A2
224963_at	9287.2	-2.17519	0.00175209	DOWN	SLC26A2
224998_at	3563.24	-0.832783	0.000734862	NOT	CMTM4
225009_at	4689.87	-0.725196	0.00365043	NOT	CMTM4
225033_at	818.292	1.80172	1.22e-06	UP	ST3GAL1
225045_at	196.609	1.67953	0.00447582	UP	CCDC88A
225071_at	996.305	0.61167	0.00433087	NOT	NUS1
225076_s_at	1144.02	1.37593	1.37e-07	UP	ZNFX1
225124_at	985.433	0.901494	0.0173484	NOT	PPP1R9B
225129_at	1861.93	-0.812332	0.00109859	NOT	CPNE2
225136_at	1597.28	1.0287	0.000856255	UP	PLEKHA2
225137_at	454.805	0.41997	0.0397545	NOT	NFATC3
225144_at	1439.62	0.572416	0.00474788	NOT	BMPR2
225177_at	3258.29	-0.614786	0.015237	NOT	RAB11FIP1
225227_at	1857.27	0.825737	0.000260418	NOT	SKIL
225251_at	976.629	0.950193	0.000140772	NOT	RAB24
225275_at	3779.48	-1.01026	0.0103762	DOWN	EDIL3
225276_at	1634.55	-0.384071	0.0253365	NOT	GSPT1
225285_at	463.993	2.0424	0.000963628	UP	BCAT1
225289_at	2706.66	0.793294	4.73e-05	NOT	STAT3
225343_at	1349.89	0.526095	0.00632851	NOT	TMED8
225344_at	6365.89	1.6191	2.45e-07	UP	NCOA7
225355_at	3277	-1.05708	0.00176093	DOWN	NEURL1B
225369_at	299.976	1.77665	2.84e-06	UP	ESAM
225415_at	3054.14	0.906978	3.74e-09	NOT	DTX3L
225418_at	1333.99	0.733959	0.000168413	NOT	PVRL2
225422_at	1810.21	0.554538	4.18e-05	NOT	CDC26
225429_at	984.637	-0.447181	0.0146235	NOT	PPP6C
225450_at	418.424	1.23002	5.84e-08	UP	AMOTL1
225496_s_at	3320.02	-1.0421	0.0209708	DOWN	SYTL2
225498_at	6445.58	-0.559243	0.00414552	NOT	CHMP4B
225502_at	1089.94	1.07368	0.00270979	UP	DOCK8
225510_at	2417.27	-1.04962	1.11e-05	DOWN	OAF
225530_at	1304.75	0.694141	0.0143245	NOT	MOB3A
225541_at	1500.19	0.80802	0.00785441	NOT	RPL22L1
225545_at	1520.93	-0.672581	6.13e-06	NOT	EEF2K
225566_at	141.754	1.88023	0.000539944	UP	NRP2
225570_at	499.522	1.05022	3.48e-05	UP	SLC41A1
225588_s_at	731.385	-0.443084	0.00562018	NOT	TMEM129
225597_at	540.42	0.767645	0.0048023	NOT	SLC45A4
225623_at	907.146	-0.808542	0.000588184	NOT	CIPC
225624_at	466.81	0.691521	0.00836928	NOT	LOC101929304
225626_at	1297.6	-0.720239	0.0217155	NOT	PAG1
225658_at	1271.67	-0.382641	0.0130181	NOT	SPOPL
225664_at	2356.77	2.68421	1.16e-06	UP	COL12A1
225671_at	1052.29	1.79073	2.4e-06	UP	SPNS2
225706_at	1572.89	1.13835	5.91e-05	UP	GLCCI1
225750_at	3474.03	0.7152	0.0231154	NOT	ERO1L
225757_s_at	433.034	-1.31371	0.0181974	DOWN	CLMN
225760_at	753.641	-0.656806	0.00484181	NOT	MYSM1
225842_at	1150.25	1.92557	0.000107765	UP	PHLDA1
225867_at	378.359	0.981342	0.00208413	NOT	VASN
225897_at	3650.07	-0.608037	0.00253125	NOT	MARCKS
225898_at	611.006	0.945856	0.00143227	NOT	WDR54
225927_at	1199.28	0.599417	0.0221381	NOT	MAP3K1
225929_s_at	1953.4	1.59424	2.11e-09	UP	RNF213
225931_s_at	1034.44	1.18848	7.23e-09	UP	RNF213
225944_at	725.562	-0.834925	0.00140862	NOT	NLN
225987_at	703.92	1.86081	9.2e-05	UP	STEAP4
226001_at	978.189	1.68133	2.83e-07	UP	KLHL5
226017_at	909.106	0.875721	0.000613371	NOT	CMTM7
226028_at	404.021	1.09872	0.00166831	UP	ROBO4
226074_at	422.746	0.976199	0.00125116	NOT	PPM1M
226099_at	1915.76	1.44112	4.75e-10	UP	ELL2
226117_at	1437.69	1.3174	8.39e-06	UP	TIFA
226150_at	2197.9	0.991976	7.28e-07	NOT	PPAPDC1B
226155_at	865.056	0.734141	4.77e-05	NOT	FAM160B1
226196_s_at	723.222	0.369006	0.0255627	NOT	IFT43
226219_at	893.664	1.33915	0.000281225	UP	ARHGAP30
226276_at	3199.69	0.581588	0.0161179	NOT	TMEM167A
226311_at	634.221	3.49943	2.78e-06	UP	ADAMTS2
226322_at	437.196	1.80469	4.17e-11	UP	TMTC1
226348_at	721.601	0.543371	0.015237	NOT	FUT11
226368_at	502.497	1.13589	0.000346245	UP	CHST11
226372_at	586.498	1.81181	1.31e-05	UP	CHST11
226397_s_at	421.114	0.872992	0.00184239	NOT	PHACTR1
226413_at	685.124	-0.536826	0.000553727	NOT	LINC00938
226435_at	448.214	1.30546	0.000511753	UP	PAPLN
226459_at	1351.3	1.32763	9.03e-05	UP	PIK3AP1
226471_at	91.3187	-1.20362	0.0155731	DOWN	GGT7
226474_at	1433.12	1.05627	2.55e-07	UP	NLRC5
226482_s_at	3481.79	-0.683078	0.00101987	NOT	TSTD1
226484_at	359.47	0.506111	0.00447799	NOT	ZBTB47
226594_at	3931.48	-1.68457	0.000735235	DOWN	ENTPD5
226603_at	1224.61	1.62866	4.63e-08	UP	SAMD9L
226605_at	1676.2	-0.572327	0.0403437	NOT	DGKQ
226621_at	1306.04	1.28841	4.21e-07	UP	OSMR
226633_at	1353.29	1.12247	2.97e-05	UP	RAB8B
226673_at	413.742	1.57598	0.000920272	UP	SH2D3C
226677_at	185.602	1.13483	0.00336819	UP	ZNF521
226678_at	117.547	2.18254	9.55e-06	UP	UNC13D
226693_at	617.086	-0.775689	0.00472973	NOT	LINC00969
226694_at	2379.3	1.30597	2.07e-07	UP	AKAP2
226695_at	535.686	3.39208	2.61e-07	UP	PRRX1
226756_at	920.157	1.40379	1.34e-05	UP	CCDC71L
226757_at	718.741	1.45004	0.000686054	UP	IFIT2
226769_at	522.673	1.81862	5.9e-09	UP	FIBIN
226793_at	1007.06	-0.792645	0.00177568	NOT	LINC00294
226795_at	500.549	0.562	0.0356465	NOT	LRCH1
226801_s_at	4093.41	0.424766	0.00910526	NOT	AIDA
226869_at	48.4392	-1.58581	0.0143894	DOWN	MEGF6
226912_at	731.663	-1.14202	7.7e-07	DOWN	ZDHHC23
226919_at	315.179	-0.483442	0.00274586	NOT	LYRM2
226931_at	441.436	1.0919	8.73e-06	UP	TMTC1
226959_at	858.899	-0.833467	0.0162031	NOT	LOC283070
226974_at	1014.28	-1.30632	0.00239797	DOWN	NEDD4L
226978_at	858.238	-0.50984	0.0250938	NOT	PPARA
226982_at	612.522	1.11919	5.44e-07	UP	ELL2
226997_at	317.157	1.78054	0.00235012	UP	ADAMTS12
227013_at	1311.04	1.18921	3.76e-06	UP	LATS2
227014_at	565.129	1.50766	1.3e-09	UP	ASPHD2
227048_at	548.342	-2.16379	0.00055016	DOWN	LAMA1
227051_at	497.14	2.2791	1e-06	UP	BACE2
227060_at	160.272	1.70084	0.00654363	UP	RELT
227076_at	120.54	-1.02354	0.0280452	DOWN	NCAPH2
227140_at	947.257	4.66351	1.02e-07	UP	INHBA
227184_at	1391.53	1.45767	5.32e-07	UP	PTAFR
227218_at	83.5436	1.63003	0.00054775	UP	RLTPR
227224_at	905.262	0.942624	5.37e-05	NOT	RALGPS2
227234_at	227.906	-1.12464	2.42e-10	DOWN	IPO5P1
227235_at	509.099	1.84865	1.72e-05	UP	GUCY1A3
227262_at	579.209	1.49052	1.1e-07	UP	HAPLN3
227274_at	1606.35	-0.588912	0.00508462	NOT	SYNJ2BP
227289_at	342.786	1.83796	1.18e-07	UP	PCDH17
227290_at	437.034	1.03341	5.96e-06	UP	CDYL2
227295_at	352.773	1.15343	1.19e-05	UP	IKBIP
227306_at	243.265	-1.23861	0.00138456	DOWN	RP11-363E7.4
227342_s_at	443.196	1.38921	0.000210947	UP	MYEOV
227347_x_at	459.981	1.05528	0.0325171	UP	HES4
227353_at	782.459	1.19839	9.66e-05	UP	TMC8
227354_at	1357.34	-0.993903	5.12e-05	NOT	PAG1
227360_at	118.172	-1.21208	0.00512148	DOWN	CTC-550B14.7
227385_at	936.009	-0.483214	0.00984064	NOT	PPAPDC2
227405_s_at	515.295	-0.669325	0.0189089	NOT	FZD8
227414_at	403.071	0.6258	0.00463476	NOT	RHBDD1
227420_at	623.055	0.628472	0.0248679	NOT	TNFAIP8L1
227458_at	802.805	2.42104	4.21e-11	UP	CD274
227485_at	554.589	-0.766894	0.012494	NOT	DDX26B
227506_at	1243.72	-2.48361	1.23e-05	DOWN	SLC16A9
227525_at	1382.02	1.17014	3.07e-05	UP	GLCCI1
227562_at	436.157	-0.855954	2.65e-05	NOT	LAMTOR3
227565_at	274.132	0.654703	0.0274196	NOT	KLHL5
227586_at	2570.74	-0.74259	0.000174305	NOT	TMEM170A
227609_at	2012.95	1.21555	0.00205929	UP	EPSTI1
227614_at	1631.69	1.87914	0.00131477	UP	HKDC1
227620_at	456.786	-0.710342	4.76e-05	NOT	SLC44A1
227623_at	242.295	0.987387	0.00134234	NOT	CACNA2D1
227629_at	528.366	-1.00829	0.0066365	DOWN	PRLR
227642_at	2104.02	-1.01638	0.0489814	DOWN	TFCP2L1
227646_at	191.087	1.87807	0.000222329	UP	EBF1
227647_at	4157.03	1.27579	4.73e-05	UP	KCNE3
227654_at	325.25	1.66631	4.85e-06	UP	FAM65C
227677_at	986.598	1.52298	6.37e-06	UP	JAK3
227678_at	783.196	-1.02202	1.49e-05	DOWN	XRCC6BP1
227682_at	1955.26	-0.631972	0.0225109	NOT	SPPL2A
227733_at	216.129	-1.19329	1.86e-05	DOWN	TMEM63C
227749_at	430.021	1.26977	3.28e-06	UP	POU2F2
227754_at	461.318	-0.560101	0.026401	NOT	---
227779_at	318.639	1.80184	2.74e-07	UP	ECSCR
227780_s_at	437.221	1.07374	9.11e-05	UP	ECSCR
227807_at	486.155	0.834738	0.000462823	NOT	PARP9
227846_at	487.872	1.3178	8.49e-05	UP	GPR176
227860_at	284.453	3.11514	2.22e-11	UP	CPXM1
227867_at	2150.03	-1.24853	0.000745331	DOWN	TRABD2A
227901_at	155.718	0.823826	0.0264428	NOT	LOC648987
227907_at	397.228	-0.924239	0.00041502	NOT	TUBGCP4
227950_at	40.1384	1.20823	0.0260818	UP	UBE2H
227959_at	1045.76	-1.1293	0.000456783	DOWN	ANKRD9
227962_at	2164.51	-0.903315	0.000405455	NOT	ACOX1
228009_x_at	2275.66	0.550328	0.0156264	NOT	ZNRD1
228042_at	115.731	1.41719	0.000477357	UP	ADPRH
228063_s_at	179.566	0.719833	0.01415	NOT	NAP1L5
228090_at	269.016	-1.28727	6.82e-05	DOWN	NMNAT3
228101_at	224.937	-1.30734	0.000357396	DOWN	APBA1
228109_at	222.145	0.837034	0.000579919	NOT	RASGRF2
228117_at	37.325	-1.41699	0.0113274	DOWN	LOC102723722
228132_at	319.596	-0.71007	0.00215347	NOT	ABLIM2
228153_at	693.118	1.50058	0.000253442	UP	RNF144B
228155_at	4549.71	-1.06089	0.000110882	DOWN	FAM213A
228176_at	730.307	1.5173	0.00076421	UP	S1PR3
228195_at	1437.36	-1.35864	0.027181	DOWN	C2orf88
228234_at	729.601	0.730633	0.000199478	NOT	TICAM2
228275_at	120.735	3.36192	5.24e-10	UP	LINC00888
228293_at	348.018	-0.993803	0.000815739	NOT	DEPDC7
228302_x_at	1299.92	-1.05899	0.0021071	DOWN	CAMK2N1
228306_at	753.157	-0.345133	0.0180756	NOT	CNIH4
228314_at	566.065	1.11302	8.34e-06	UP	LOC101927933
228325_at	310.049	1.36182	0.000768154	UP	SPIDR
228336_at	1078.37	-0.492455	3.76e-06	NOT	PWWP2A
228339_at	304.658	1.54038	6.68e-08	UP	ECSCR
228362_s_at	83.6807	2.7225	6.68e-06	UP	FAM26F
228383_at	123.732	-1.38527	0.00210105	DOWN	PNPLA7
228390_at	283.964	1.64335	1.11e-05	UP	RAB30
228418_at	431.958	0.535277	0.036124	NOT	EXOC5
228438_at	107.148	1.17012	0.00405315	UP	LOC100132891
228461_at	473.64	1.05831	0.00116877	UP	SH3RF3
228469_at	705.769	-1.18107	0.00235784	DOWN	---
228510_at	137.653	-0.952452	0.0354086	NOT	ATAT1
228527_s_at	88.9453	1.1902	0.0058931	UP	SLC25A37
228531_at	1182.63	1.01125	0.0268772	UP	SAMD9
228581_at	57.2856	2.45505	1.02e-05	UP	KCNJ10
228582_x_at	421.211	-1.26517	0.00207975	DOWN	MALAT1
228598_at	120.559	-2.09396	0.00188083	DOWN	DPP10
228607_at	268.545	0.952843	2.28e-05	NOT	OAS2
228609_at	16.8943	-1.25466	0.0462803	DOWN	LOC102723600
228658_at	458.558	0.798724	0.00740511	NOT	MIAT
228665_at	549.395	1.36003	1.77e-08	UP	CYYR1
228698_at	292.485	0.943857	0.000560683	NOT	SOX7
228716_at	212.906	-1.71726	0.00551799	DOWN	THRB
228725_x_at	1134.74	0.493969	0.00485052	NOT	PRMT2
228758_at	287.405	2.28102	2.78e-06	UP	BCL6
228776_at	354.715	2.26767	2.25e-08	UP	GJC1
228811_at	183.699	-0.768573	0.00871286	NOT	---
228812_at	644.318	0.875907	0.000792285	NOT	REL
228821_at	92.6713	-1.99639	0.00965929	DOWN	ST6GAL2
228835_at	529.205	-1.06722	0.000933199	DOWN	RP4-758J24.5
228863_at	400.298	2.82127	4.82e-14	UP	PCDH17
228918_at	219.004	2.21151	1.1e-06	UP	SLC43A2
228925_at	279.279	-1.03193	0.000473484	DOWN	ADAM1A
228955_at	321.472	1.68897	0.000960512	UP	LRP8
228961_at	1837.71	-1.05211	0.0103928	DOWN	MIER3
228964_at	1905.16	1.05476	9.2e-05	UP	PRDM1
228993_s_at	3315.59	-1.22973	0.00439602	DOWN	BBIP1
228997_at	109.792	-1.03429	0.0302269	DOWN	TRNAU1AP
229012_at	199.384	-1.19433	0.00912823	DOWN	C9orf24
229053_at	165.007	-1.42245	0.00159749	DOWN	SYT17
229079_at	118.453	-1.09939	0.0195807	DOWN	EHMT2
229114_at	759.03	-0.8176	0.00281209	NOT	GAB1
229158_at	746.249	-1.27213	0.0133627	DOWN	WNK4
229242_at	554.861	0.964186	0.000797458	NOT	TNFSF15
229256_at	641.937	0.589032	0.0287977	NOT	PGM2L1
229257_at	535.254	0.662232	0.00767235	NOT	TNRC18
229276_at	376.562	-1.13381	0.0228839	DOWN	IGSF9
229373_at	172.177	2.14139	1.71e-06	UP	---
229383_at	429.536	0.943407	0.00157162	NOT	2019
229390_at	2288.23	2.87961	4.42e-13	UP	FAM26F
229402_at	992.301	-0.981354	0.0323018	NOT	SAMD13
229415_at	599.687	-1.26776	9.42e-06	DOWN	CYCS
229437_at	199.935	1.98395	2.76e-07	UP	MIR155
229450_at	1617.21	2.41598	2.58e-10	UP	IFIT3
229468_at	555.229	-1.10455	4.61e-06	DOWN	CDK3
229473_at	260.218	-1.57701	0.0278914	DOWN	MAMDC4
229499_at	335.719	-1.41772	0.0375646	DOWN	CAPN13
229527_s_at	16.809	-1.24065	0.0203067	DOWN	---
229530_at	499.878	2.15942	3e-07	UP	GUCY1A3
229543_at	319.441	2.04454	2.85e-11	UP	RP1-93H18.6
229546_at	561.994	-1.10592	0.00155108	DOWN	FAM84A
229554_at	344.845	1.50695	0.000271951	UP	LUM
229560_at	569.801	1.77479	3.84e-05	UP	TLR8
229597_s_at	347.203	1.47253	0.000821347	UP	WDFY4
229602_at	195.795	-0.632278	0.00271788	NOT	---
229616_s_at	171.688	2.28491	0.00336211	UP	GRAMD2
229657_at	337.855	-1.62942	0.000686054	DOWN	THRB
229672_at	230.095	-0.714187	0.0101535	NOT	UQCC1
229688_at	88.8087	-1.02715	0.00116567	DOWN	PRDM11
229729_at	170.117	-0.813755	0.0300297	NOT	TMEM8B
229761_at	51.112	-1.24804	0.037482	DOWN	LOC440173
229797_at	125.901	-0.95665	0.00680228	NOT	MCOLN3
229802_at	443.336	3.38889	2.42e-10	UP	WISP1
229810_at	803.969	-0.613784	0.00065927	NOT	RSPH3
229816_at	209.742	-1.26405	0.00275596	DOWN	WDR78
229822_at	84.1304	1.91565	0.00118719	UP	PARVB
229831_at	350.808	-1.52746	0.0157282	DOWN	CNTN3
229942_at	213.304	1.69093	1.9e-06	UP	BNC2
229971_at	175.76	1.57186	1.04e-06	UP	GPR114
230000_at	633.83	0.764171	0.00711048	NOT	RNF213
230031_at	589.125	0.531638	0.00782561	NOT	HSPA5
230036_at	678.705	1.39433	2.99e-08	UP	SAMD9L
230043_at	293.661	-1.85523	4.39e-07	DOWN	MUC20
230050_at	197.602	0.964787	0.000530976	NOT	NACC2
230053_at	86.7933	-1.87542	0.00435962	DOWN	---
230082_at	459.078	-0.604487	0.00198131	NOT	---
230112_at	47.1167	-1.28777	0.00415203	DOWN	2019
230117_at	109.705	-1.83486	0.000478736	DOWN	VSTM2A
230177_at	429.402	-0.987964	0.00640735	NOT	GTF2H2
230276_at	170.916	1.22433	0.00119872	UP	FAM49A
230364_at	499.776	-1.15249	0.000416546	DOWN	CHPT1
230385_at	106.406	-1.42088	0.00333696	DOWN	2019
230406_at	474.14	2.05323	3.06e-11	UP	---
230426_at	556.815	-0.575344	0.00698303	NOT	DLD
230456_at	146.212	-1.59915	0.0076794	DOWN	---
230485_at	537.833	-1.60256	0.000384826	DOWN	PHGR1
230490_x_at	598.809	-0.516409	0.00576912	NOT	RSU1
230499_at	757.331	1.29324	1.75e-09	UP	BIRC3
230514_s_at	60.9283	-1.53178	0.00227959	DOWN	LYZL1
230573_at	543.584	-1.67076	2.32e-06	DOWN	SGK2
230615_at	2193.74	6.55009	1.5e-17	UP	DUOXA2
230666_at	268.957	-1.08448	0.000943903	DOWN	HOXA11-AS
230682_x_at	754.924	-1.01747	0.0106698	DOWN	ABCC3
230712_at	642.425	-1.27072	0.000826812	DOWN	LOC101930059
230740_at	366.326	0.762374	0.000997557	NOT	EHD3
230746_s_at	933.633	3.85104	1.16e-06	UP	---
230757_at	111.592	-1.55996	0.0161581	DOWN	---
230768_at	165.117	-0.745122	0.0010805	NOT	---
230778_at	368.27	-1.11368	0.0419455	DOWN	---
230794_at	18.4108	-1.13365	0.00428048	DOWN	PELI2
230836_at	426.209	1.07401	0.000136143	UP	ST8SIA4
230877_at	131.795	3.37832	0.000265514	UP	IGHD
231001_at	140.429	1.58854	1.4e-06	UP	FIBIN
231070_at	203.9	-1.10275	0.038648	DOWN	IYD
231078_at	110.642	2.80389	4.28e-09	UP	SLC25A37
231114_at	35.8131	1.07863	0.00193974	UP	SPATA22
231125_at	38.8889	-1.57122	0.00519895	DOWN	---
231141_at	25.9162	-1.26177	0.0157707	DOWN	RP11-217B1.2
231260_at	18.151	-1.20015	0.018346	DOWN	ZNF582-AS1
231389_at	11.4564	-1.03213	0.00640269	DOWN	PIH1D3
231505_s_at	227.469	-0.649984	0.037226	NOT	SFXN4
231577_s_at	3968.6	2.93878	1.26e-16	UP	GBP1
231597_x_at	20.8064	-1.33363	0.0249589	DOWN	---
231617_at	18.6244	-1.56721	0.0138036	DOWN	TEX33
231619_at	327.222	-0.824813	0.00430755	NOT	---
231649_at	51.9533	-1.41758	0.0430972	DOWN	---
231679_at	8.42747	-1.49991	0.0409412	DOWN	RP11-161I6.2
231766_s_at	501.241	2.9361	4.85e-05	UP	COL12A1
231776_at	231.254	0.91168	0.0116775	NOT	EOMES
231779_at	434.091	1.80399	1.9e-06	UP	IRAK2
231851_at	728.337	-1.15389	0.00181323	DOWN	RAVER2
231874_at	213.586	-0.738552	0.0344067	NOT	FAM126B
231925_at	714.942	-1.37313	0.00933917	DOWN	RP11-38P22.2
231947_at	216.1	1.09025	0.000335159	UP	MYCT1
231975_s_at	964.378	-1.18285	0.0112659	DOWN	MIER3
232008_s_at	706.645	0.647409	0.00286325	NOT	BBX
232061_at	38.0869	-1.09531	0.0303271	DOWN	SDK2
232114_at	24.0134	1.67135	0.00284005	UP	MED12L
232121_at	26.1938	-1.2832	0.0267012	DOWN	TRDMT1
232145_at	287.524	-0.507492	0.015601	NOT	C2orf68
232166_at	75.8823	-1.11059	0.0474949	DOWN	KIAA1377
232245_at	96.1536	-2.05043	0.0044812	DOWN	SLC25A34
232261_at	24.1952	-1.52949	0.0100723	DOWN	---
232277_at	200.44	1.3896	0.0127947	UP	SLC28A3
232288_at	95.8042	-1.24881	0.000913662	DOWN	LOC102724985
232297_at	299.575	0.913021	0.000175514	NOT	KLHL5
232311_at	220.334	0.869926	0.00299928	NOT	B2M
232352_at	63.1557	2.15866	0.00165905	UP	ISL2
232477_at	25.9136	-1.51032	0.0112234	DOWN	---
232488_at	617.921	-0.759077	0.00992814	NOT	PHYKPL
232501_at	82.6218	-1.08626	0.0251627	DOWN	RNF150
232567_at	146.238	-1.28209	0.0052353	DOWN	ARHGAP8
232594_at	478.051	-1.0646	0.00419041	DOWN	HSBP1L1
232629_at	373.124	6.14301	2.04e-11	UP	PROK2
232694_at	17.0634	-1.10679	0.0196376	DOWN	ZNF395
232707_at	2072.17	-1.3659	0.0282172	DOWN	ISX
232709_at	231.452	0.628106	0.00687681	NOT	---
232753_at	109.742	-1.3141	0.01555	DOWN	ZNF346
232754_at	18.3249	-1.68439	0.00150486	DOWN	---
232851_at	39.1273	-1.42738	0.0422246	DOWN	FBXO3
232859_s_at	110.19	-1.35287	0.00689623	DOWN	MAGI1
232887_at	84.0652	1.09186	0.0053034	UP	PIRT
232914_s_at	3276.52	-0.994476	0.0169118	NOT	SYTL2
232944_at	9.23584	-1.13988	0.0112442	DOWN	---
232976_at	43.6444	1.58769	0.0204913	UP	SNORD116-17
233022_at	38.8276	-1.51578	0.0108563	DOWN	TRPM3
233040_at	39.0451	-1.26338	0.0282586	DOWN	PLEKHA5
233130_at	124.656	-0.935957	0.020497	NOT	THRB-IT1
233187_s_at	13.6117	-1.89457	0.000967507	DOWN	---
233234_at	35.9243	-1.24971	0.0173563	DOWN	KCTD16
233269_at	163.884	-1.28715	0.0277304	DOWN	XXbac-B476C20.9
233319_x_at	286.054	-0.634953	0.00909198	NOT	---
233368_s_at	20.4576	-1.44236	0.00774221	DOWN	DNAJC27
233388_at	360.722	-1.51217	0.000174935	DOWN	---
233477_at	268.883	-1.20495	0.0430364	DOWN	KLK15
233482_at	17.2581	-1.54227	0.0135046	DOWN	C15orf59
233486_at	315.114	-1.03166	0.0266922	DOWN	LOC101928881
233497_at	55.3685	-1.26638	0.0151558	DOWN	---
233502_at	23.1428	-1.19779	0.0473306	DOWN	---
233514_x_at	252.462	-1.02336	0.0431465	DOWN	TEX11
233527_at	308.611	-1.4912	0.000289208	DOWN	LOC101929340
233539_at	229.592	-1.24679	0.00232227	DOWN	NAPEPLD
233581_at	50.8242	-1.11096	0.0328895	DOWN	---
233592_at	76.2398	-1.21099	0.00350548	DOWN	ANKRD18B
233685_at	15.7172	-1.18291	0.0175355	DOWN	---
233720_at	51.2845	-1.52642	0.000673135	DOWN	SORBS2
233724_at	33.7924	-1.26973	0.0199129	DOWN	ARNT
233728_at	18.2876	-1.07788	0.00691381	DOWN	---
233770_at	80.4846	-1.3179	0.00192982	DOWN	RP1-86D1.3
233823_at	99.2361	-1.86132	0.000198167	DOWN	FAM184B
233829_at	134.83	-1.351	0.00245	DOWN	TLDC2
233848_x_at	19.6858	-1.29943	0.0135049	DOWN	ZNF221
233865_at	47.7862	1.25486	0.0135772	UP	NPAS3
233875_at	28.4056	-1.6068	0.00588246	DOWN	---
233877_at	210.076	-1.10149	0.0434214	DOWN	---
233963_at	15.8409	-1.15943	0.02164	DOWN	H2BFXP
233969_at	205.728	4.44945	0.000119868	UP	IGLC1
233972_s_at	18.735	-1.16597	0.00176376	DOWN	FEZF2
233986_s_at	96.9686	2.69573	1.95e-08	UP	PLEKHG2
234050_at	153.394	1.57972	0.0124915	UP	TAGAP
234058_at	34.0984	-1.27811	0.0407677	DOWN	RP11-515O17.3
234065_at	41.3584	-1.1323	0.0470316	DOWN	---
234066_at	265.996	0.737339	0.0178907	NOT	IL1RL1
234165_at	256.558	-1.05689	0.0045652	DOWN	PTGDR
234193_at	99.811	-1.04661	0.00457559	DOWN	---
234219_at	371.43	-1.59452	1.36e-05	DOWN	LOC101928820
234264_at	53.9508	1.69914	0.000643659	UP	---
234291_s_at	363.676	1.35286	0.0226192	UP	SLC6A20
234415_x_at	126.727	3.33841	2.45e-08	UP	---
234519_at	135.435	-0.955582	0.0156719	NOT	NOBOX
234544_at	12.6095	-1.62058	0.0138883	DOWN	ARHGEF12
234581_at	61.8786	-1.0028	0.00194238	DOWN	---
234589_at	33.8139	-1.18641	0.0421025	DOWN	TMEM106A
234646_at	13.8918	-1.14951	0.0427927	DOWN	---
234650_at	114.171	-1.07304	0.00800694	DOWN	---
234688_x_at	54.2175	-1.41807	0.00912823	DOWN	CNTROB
234702_x_at	28.0579	-1.56829	0.0020932	DOWN	CFTR
234709_at	203.265	-1.96375	0.00305347	DOWN	CAPN13
234737_at	56.3409	-1.49363	0.00340115	DOWN	NT5DC3
234764_x_at	8337.8	1.50302	0.00790216	UP	CKAP2
234864_s_at	72.4103	-2.2711	5.94e-06	DOWN	TRPM6
234884_x_at	2258.2	1.26745	0.00472841	UP	CKAP2
234971_x_at	497.797	-1.38777	0.00423376	DOWN	PLCD3
234985_at	454.073	1.33681	0.000709507	UP	LDLRAD3
235004_at	188.645	-1.34096	0.0270292	DOWN	RBM24
235079_at	463.331	-1.3736	3.63e-05	DOWN	ZNF704
235122_at	133.134	1.78152	4.35e-06	UP	HIVEP3
235124_at	368.506	-0.36205	0.0217298	NOT	EIF3J-AS1
235134_at	287.622	-0.662541	0.00400472	NOT	RP11-111M22.3
235147_at	1012.72	-1.35792	0.00167749	DOWN	---
235204_at	686.953	0.502985	0.03977	NOT	ENTPD7
235208_at	324.679	-0.46698	0.00336211	NOT	CCDC112
235229_at	830.241	3.20142	1.98e-11	UP	---
235245_at	484.972	1.32092	2.24e-06	UP	TMEM92
235349_at	642.087	-1.1803	0.000485018	DOWN	RMDN2
235371_at	474.949	-1.16589	0.00235326	DOWN	GXYLT2
235382_at	20.7567	1.86085	0.0102124	UP	AQPEP
235484_at	515.162	-0.789085	9.48e-05	NOT	PTAR1
235500_at	163.209	-1.38209	0.0234644	DOWN	HNRNPC
235529_x_at	2157.43	1.08843	0.000458774	UP	SAMHD1
235536_at	697.576	0.719816	0.0115946	NOT	SNORD89
235568_at	310.928	2.52058	4e-05	UP	MCEMP1
235574_at	199.335	1.75924	3.51e-07	UP	GBP4
235591_at	210.167	-1.07856	0.0170336	DOWN	SSTR1
235643_at	305.445	1.83057	3.64e-05	UP	SAMD9L
235657_at	101.043	2.09125	2.35e-07	UP	---
235670_at	251.725	1.54092	2.86e-08	UP	STX11
235680_at	254.326	0.697099	0.0410736	NOT	---
[truncated: 266 more rows]
