# Supplementary material for: Profiling the lncRNA-miRNA-mRNA ceRNA network to reveal potential crosstalk between inflammatory bowel disease and colorectal cancer
Source: PeerJ. 2019 Aug 26;7:e7451. doi: 10.7717/peerj.7451 (PMC6714963; doi:10.7717/peerj.7451)
Supplement: Table S6 [file peerj-07-7451-s006.xlsx]

## Sheet: Supplymentary Table 6 DE-miRNA_
ID	log2(FC)	AveExpr	P.Value	change
hsa-miR-143	-3.24706	11.2006	6.76e-07	DOWN
hsa-miR-1178	-2.42254	5.12852	2.72e-05	DOWN
hsa-miR-106b	-1.17868	6.9841	6.58e-05	DOWN
hsa-miR-130a	-1.32387	3.88432	0.000166156	DOWN
hsa-miR-133a	-1.68437	6.71615	0.000253702	DOWN
hsa-miR-19a	-1.01434	4.78248	0.000347002	DOWN
hsa-miR-93	-1.24139	5.97811	0.000348849	DOWN
hsa-miR-195	-2.35767	6.24454	0.000379231	DOWN
hsa-miR-186	-2.50833	5.53543	0.000398604	DOWN
hsa-miR-1979	-1.35085	5.90345	0.000418509	DOWN
hsa-miR-374b	-1.8638	5.86661	0.00044999	DOWN
hsa-miR-34a	-1.88639	6.3964	0.000496664	DOWN
hsa-miR-210	-1.18835	4.26043	0.000521521	DOWN
hsa-miR-141	-1.77239	5.9258	0.00058936	DOWN
hsa-miR-497	-1.23623	8.29254	0.0006447	DOWN
hsa-miR-1974	-2.55226	6.47141	0.000651708	DOWN
hsa-miR-1274a	-1.17908	11.527	0.000723088	DOWN
hsa-miR-151-3p	-1.79566	5.77259	0.000968802	DOWN
hsa-miR-140-5p	-1.45255	5.24029	0.000995964	DOWN
hsa-miR-216a	-1.02186	5.41598	0.00102827	DOWN
hsa-miR-374a	-1.80641	4.09524	0.00141428	DOWN
hsa-miR-429	-1.21374	4.72353	0.001433	DOWN
hsa-miR-139-5p	-1.12527	4.91228	0.0014515	DOWN
hsa-miR-152	-1.50184	4.66635	0.00165415	DOWN
hsa-miR-27a	-1.643	6.30977	0.00170195	DOWN
hsa-miR-192	-1.34538	9.80775	0.0017476	DOWN
hsa-miR-296-5p	-1.22742	5.99581	0.00183791	DOWN
hsa-miR-1290	-1.11224	3.0087	0.00188057	DOWN
hsa-miR-127-3p	-1.31326	3.95614	0.00191169	DOWN
hsa-miR-1260	-1.33426	12.6016	0.00219861	DOWN
hsa-miR-423-3p	-1.36462	6.11261	0.00292446	DOWN
hsa-miR-151-5p	-1.21853	7.05841	0.00315332	DOWN
hsa-miR-490-3p	-1.0144	5.17251	0.00335905	DOWN
hsa-miR-32	-1.12371	4.2912	0.00337607	DOWN
hsa-miR-194	-1.98284	9.11113	0.0041972	DOWN
hsa-miR-214	-1.22516	6.23366	0.0042587	DOWN
hsa-miR-378	-1.1526	8.18418	0.00455119	DOWN
hsa-miR-331-3p	-1.25191	6.02834	0.00722745	DOWN
hsa-miR-381	-1.19169	4.26633	0.00910137	DOWN
hsa-miR-376c	-1.02568	5.33523	0.00921024	DOWN
hsa-miR-16	-1.56763	10.9264	0.011115	DOWN
hsa-miR-320c	-1.56691	8.13597	0.021472	DOWN
hsa-miR-708	-1.14283	6.0387	0.0252271	DOWN
hsa-miR-30c	-1.07864	7.24829	0.0411686	DOWN
hsa-miR-579	-1.17379	7.84679	0.0426578	DOWN
hsa-miR-548a-3p	1.12039	4.94596	1.22e-05	UP
hsa-let-7i	1.09371	10.4054	1.58e-05	UP
hsa-miR-300	1.33996	5.57006	3.84e-05	UP
hsa-miR-523	1.71573	6.95424	5.11e-05	UP
hsa-miR-584	1.09877	5.21392	5.51e-05	UP
hsa-miR-193a-3p	1.95755	8.16208	0.000100573	UP
hsa-miR-2117	1.15856	5.62272	0.000101279	UP
hsa-miR-495	1.11442	6.14374	0.000161625	UP
hsa-miR-453	1.489	6.79285	0.000186893	UP
hsa-miR-718	1.06997	4.24919	0.000284796	UP
hsa-miR-10b	1.10977	8.41711	0.000298132	UP
hsa-miR-655	1.39351	6.14308	0.000305051	UP
hsa-let-7b	1.24575	12.1993	0.000337708	UP
hsa-miR-651	1.25608	5.89747	0.000416489	UP
hsa-miR-126	1.23362	11.8917	0.000624988	UP
hsa-miR-181a	1.17458	9.00105	0.000841163	UP
hsa-miR-634	1.09687	4.61905	0.000851474	UP
hsa-miR-455-3p	1.1746	6.76457	0.00125934	UP
hsa-miR-548d-3p	1.07662	5.6385	0.00135798	UP
hsa-miR-206	1.12932	7.05573	0.00136792	UP
hsa-miR-548f	1.089	4.77228	0.00143254	UP
hsa-miR-551b	1.02358	5.87425	0.00337227	UP
hsa-miR-574-5p	1.05109	7.31234	0.00484475	UP
hsa-miR-548g	1.21175	5.2841	0.00792256	UP
hsa-miR-615-5p	1.03908	6.23065	0.00900467	UP
hsa-miR-506	1.08342	4.17246	0.0114059	UP
hsa-let-7d	1.10202	9.77564	0.0433657	UP
