# Supplementary material for: Profiling the lncRNA-miRNA-mRNA ceRNA network to reveal potential crosstalk between inflammatory bowel disease and colorectal cancer
Source: PeerJ. 2019 Aug 26;7:e7451. doi: 10.7717/peerj.7451 (PMC6714963; doi:10.7717/peerj.7451)
Supplement: Table S8 [file peerj-07-7451-s008.xlsx]

## Sheet: Supplymentary Table 8  CRCvsNor
miRNA_ID	log2(FC)	AveExpr	P.Value	change
hsa-miR-3622a	-2.55905	0.110992	5.6e-93	DOWN
hsa-miR-885	-2.34658	0.162137	1.53e-68	DOWN
hsa-miR-6511b-2	-3.94841	0.725339	9.72e-65	DOWN
hsa-miR-504	-4.24095	0.571934	7.73e-62	DOWN
hsa-miR-6803	-2.23661	0.251307	6.15e-61	DOWN
hsa-miR-6511b-1	-4.09849	0.676213	6.46e-61	DOWN
hsa-miR-139	-5.44422	4.71764	1.05e-56	DOWN
hsa-miR-328	-5.42311	3.97882	7.54e-55	DOWN
hsa-miR-6887	-1.80206	0.150947	2.09e-54	DOWN
hsa-let-7d	-3.70762	9.19682	2.09e-50	DOWN
hsa-miR-197	-4.95644	7.9146	5.58e-50	DOWN
hsa-miR-3620	-1.58208	0.134972	5.86e-49	DOWN
hsa-miR-4632	-1.68952	0.16697	6.71e-48	DOWN
hsa-miR-125a	-4.08866	8.14741	1.13e-46	DOWN
hsa-miR-6749	-1.15561	0.0759429	3.33e-46	DOWN
hsa-let-7b	-3.57647	13.1768	1.55e-45	DOWN
hsa-miR-766	-4.27354	2.78002	8.57e-44	DOWN
hsa-miR-129-1	-4.82578	1.066	9.87e-43	DOWN
hsa-miR-6720	-2.63523	0.497516	2.53e-42	DOWN
hsa-miR-1976	-4.30796	3.03462	3.19e-42	DOWN
hsa-miR-7641-2	-2.71572	0.309148	5.37e-42	DOWN
hsa-miR-129-2	-4.55687	1.19541	6.02e-40	DOWN
hsa-miR-1306	-4.09821	2.91538	7.89e-39	DOWN
hsa-miR-5187	-2.00509	0.374094	1.33e-37	DOWN
hsa-miR-4754	-1.45544	0.149664	2.01e-37	DOWN
hsa-miR-423	-3.16994	7.04013	5.27e-37	DOWN
hsa-miR-3173	-2.76018	0.642375	6.03e-37	DOWN
hsa-miR-4732	-2.17739	0.260128	3.86e-35	DOWN
hsa-miR-605	-2.61354	0.59343	6.69e-35	DOWN
hsa-miR-1538	-1.88424	0.278052	8.96e-35	DOWN
hsa-miR-6810	-1.35373	0.149129	9.05e-35	DOWN
hsa-miR-486-2	-6.06182	4.75343	5.84e-34	DOWN
hsa-miR-6812	-1.17871	0.107511	1.01e-33	DOWN
hsa-miR-486-1	-6.05437	4.73935	2.52e-33	DOWN
hsa-miR-346	-1.30319	0.121701	3.05e-33	DOWN
hsa-miR-6793	-2.00881	0.431745	9.77e-33	DOWN
hsa-miR-1224	-4.43193	0.693564	2.02e-32	DOWN
hsa-miR-1343	-2.50645	0.576042	2.27e-32	DOWN
hsa-miR-6833	-1.34727	0.199451	1.76e-31	DOWN
hsa-miR-6808	-1.9485	0.365684	3.61e-31	DOWN
hsa-miR-574	-3.90464	5.69734	4.58e-31	DOWN
hsa-miR-99b	-3.24328	13.671	8.72e-31	DOWN
hsa-miR-7110	-1.17936	0.137353	7.72e-30	DOWN
hsa-miR-181a-1	-3.30499	8.74925	1.18e-29	DOWN
hsa-miR-3154	-1.08942	0.128914	5.4e-29	DOWN
hsa-miR-4728	-3.1503	0.875383	6.47e-29	DOWN
hsa-miR-1226	-3.09599	1.01962	8.37e-29	DOWN
hsa-miR-5090	-1.3844	0.193088	9.7e-29	DOWN
hsa-miR-433	-2.8507	1.10531	4.63e-28	DOWN
hsa-miR-6726	-1.25342	0.148101	8.96e-28	DOWN
hsa-miR-6879	-1.35187	0.18819	2.11e-27	DOWN
hsa-miR-1227	-1.33443	0.181558	3.23e-27	DOWN
hsa-miR-6125	-2.02382	0.479956	5.6e-27	DOWN
hsa-miR-2110	-2.98845	1.66021	8.34e-27	DOWN
hsa-miR-6507	-1.42156	0.20895	1.96e-26	DOWN
hsa-miR-7155	-1.72212	0.342079	2.31e-26	DOWN
hsa-miR-3615	-3.55244	2.40338	3.46e-26	DOWN
hsa-miR-589	-2.53356	5.76997	6.42e-26	DOWN
hsa-miR-193a	-3.54857	6.96028	6.77e-26	DOWN
hsa-miR-4676	-2.37059	0.841965	1.5e-25	DOWN
hsa-miR-671	-2.71291	2.9257	2.31e-25	DOWN
hsa-miR-378a	-3.04349	10.3291	1.27e-24	DOWN
hsa-miR-3944	-1.70604	0.360238	1.67e-24	DOWN
hsa-miR-1295a	-1.52274	0.27315	1.91e-24	DOWN
hsa-miR-642a	-4.393	2.03672	1.93e-24	DOWN
hsa-miR-149	-4.33799	3.46243	2.25e-24	DOWN
hsa-miR-1249	-2.66783	1.19525	3.55e-24	DOWN
hsa-miR-3940	-3.19491	1.41047	1.2e-23	DOWN
hsa-miR-4685	-1.48429	0.305819	2.99e-23	DOWN
hsa-miR-145	-3.96507	11.0224	3.02e-23	DOWN
hsa-miR-181a-2	-2.54815	9.83523	6.5e-23	DOWN
hsa-miR-485	-3.01867	1.89112	7.32e-23	DOWN
hsa-miR-3917	-2.84885	1.30364	7.46e-23	DOWN
hsa-miR-1180	-4.09906	3.32213	9.48e-23	DOWN
hsa-miR-7706	-2.6716	1.61892	9.6e-23	DOWN
hsa-miR-3127	-3.48829	2.81817	3.04e-22	DOWN
hsa-miR-484	-2.79297	5.62552	4.2e-22	DOWN
hsa-miR-1228	-2.25948	0.850255	4.46e-22	DOWN
hsa-miR-1296	-3.35336	2.39575	5.16e-22	DOWN
hsa-miR-92b	-3.44394	5.86421	5.84e-22	DOWN
hsa-miR-7702	-3.00606	0.82927	9.42e-22	DOWN
hsa-miR-193b	-3.26405	4.97365	9.45e-22	DOWN
hsa-miR-4787	-1.62065	0.321047	1.04e-21	DOWN
hsa-miR-5010	-2.01808	0.736444	2.63e-21	DOWN
hsa-miR-324	-2.6841	4.95813	3.49e-21	DOWN
hsa-miR-6892	-2.39532	1.44775	6.92e-21	DOWN
hsa-miR-140	-2.25809	9.26265	1.25e-20	DOWN
hsa-miR-28	-1.45622	12.257	6.87e-20	DOWN
hsa-miR-150	-4.20615	8.39313	9.32e-20	DOWN
hsa-miR-15b	-2.55355	7.67975	1.86e-19	DOWN
hsa-miR-2116	-1.85732	0.761539	2.52e-19	DOWN
hsa-miR-6716	-1.6104	0.531988	1.2e-18	DOWN
hsa-miR-132	-2.23991	6.30494	4.08e-18	DOWN
hsa-miR-133a-2	-4.43208	2.94132	6.2e-18	DOWN
hsa-miR-326	-3.03643	2.19652	1.27e-17	DOWN
hsa-miR-3690-1	-1.51403	0.457687	3.75e-17	DOWN
hsa-miR-6734	-1.02394	0.232969	5.02e-17	DOWN
hsa-miR-3928	-2.3579	1.23081	5.36e-17	DOWN
hsa-miR-7641-1	-2.75429	0.732969	5.87e-17	DOWN
hsa-miR-320c-1	-1.3992	0.476993	7.13e-17	DOWN
hsa-miR-1307	-2.81013	10.5767	7.3e-17	DOWN
hsa-miR-3199-2	-1.2928	0.457538	1.55e-16	DOWN
hsa-miR-487a	-2.01019	1.15206	2.29e-16	DOWN
hsa-miR-133a-1	-4.34451	3.05367	3.93e-16	DOWN
hsa-miR-1468	-2.61223	2.33091	6.29e-16	DOWN
hsa-miR-6777	-1.01364	0.20558	1.1e-15	DOWN
hsa-miR-6842	-2.41264	1.77112	1.36e-15	DOWN
hsa-miR-874	-2.93214	4.13804	1.52e-15	DOWN
hsa-miR-125b-2	-3.19831	6.68072	2.47e-15	DOWN
hsa-miR-125b-1	-3.19343	6.6429	2.48e-15	DOWN
hsa-miR-1229	-1.69522	0.582184	2.91e-15	DOWN
hsa-miR-432	-2.48606	2.54801	3.03e-15	DOWN
hsa-miR-652	-2.19884	4.81293	3.17e-15	DOWN
hsa-miR-3150b	-3.34675	1.69982	7.83e-15	DOWN
hsa-miR-3605	-2.61544	1.7881	1.36e-14	DOWN
hsa-miR-760	-2.17667	0.963998	2.38e-14	DOWN
hsa-miR-6802	-1.17274	0.333565	2.67e-14	DOWN
hsa-miR-744	-2.55098	5.24122	3.75e-14	DOWN
hsa-miR-370	-2.11496	3.13586	1.2e-13	DOWN
hsa-miR-887	-1.97074	1.57226	1.5e-13	DOWN
hsa-miR-375	-3.68755	14.3035	2.01e-13	DOWN
hsa-miR-1254-2	-1.21994	0.417442	6.52e-13	DOWN
hsa-miR-92a-1	-2.49018	13.0805	7.54e-13	DOWN
hsa-miR-92a-2	-2.4507	12.9751	1.09e-12	DOWN
hsa-let-7c	-3.13262	8.48479	1.46e-12	DOWN
hsa-miR-6877	-1.07994	0.341015	2.88e-12	DOWN
hsa-miR-6715b	-2.06393	0.934053	2.89e-12	DOWN
hsa-miR-490	-3.9503	1.21146	2.89e-12	DOWN
hsa-miR-937	-2.43135	1.70014	3.4e-12	DOWN
hsa-miR-361	-1.83435	8.03622	3.79e-12	DOWN
hsa-let-7a-2	-1.66461	12.5172	8.73e-12	DOWN
hsa-miR-6509	-1.26689	0.547743	9.03e-12	DOWN
hsa-miR-200c	-2.2129	13.3659	1.05e-11	DOWN
hsa-let-7a-3	-1.65072	12.526	1.1e-11	DOWN
hsa-let-7a-1	-1.64885	12.5216	1.17e-11	DOWN
hsa-miR-3074	-2.32398	2.84344	1.32e-11	DOWN
hsa-miR-187	-2.52352	0.843148	8.84e-11	DOWN
hsa-miR-296	-3.07397	2.18937	9.02e-11	DOWN
hsa-miR-431	-1.89469	3.34656	1.24e-10	DOWN
hsa-miR-664b	-1.74218	1.71682	1.32e-10	DOWN
hsa-miR-219a-1	-1.8561	2.16645	1.46e-10	DOWN
hsa-miR-6798	-1.04712	0.346938	1.82e-10	DOWN
hsa-miR-3614	-2.14909	2.05558	2.11e-10	DOWN
hsa-miR-505	-1.77253	5.68137	2.16e-10	DOWN
hsa-miR-4746	-2.0473	1.8458	6.56e-10	DOWN
hsa-miR-1270	-1.23166	0.551733	8.27e-10	DOWN
hsa-miR-342	-2.11724	6.01035	1.09e-09	DOWN
hsa-miR-5698	-1.20147	0.473902	1.33e-09	DOWN
hsa-miR-127	-1.65965	9.56295	1.35e-09	DOWN
hsa-miR-323a	-1.88651	2.11379	1.71e-09	DOWN
hsa-miR-339	-2.19682	5.27637	2.37e-09	DOWN
hsa-miR-1292	-1.1911	0.656703	2.51e-09	DOWN
hsa-miR-5001	-1.1801	0.771022	6.51e-09	DOWN
hsa-miR-5091	-1.30551	0.74302	8.24e-09	DOWN
hsa-miR-501	-2.0556	5.65292	1.21e-08	DOWN
hsa-miR-30d	-1.34851	12.2435	2.21e-08	DOWN
hsa-miR-615	-2.22916	0.884817	4.59e-08	DOWN
hsa-miR-1266	-2.33814	3.69709	4.61e-08	DOWN
hsa-miR-1301	-1.59949	2.72785	5.49e-08	DOWN
hsa-miR-331	-1.86556	4.59678	6.14e-08	DOWN
hsa-miR-664a	-1.39911	3.93363	1.46e-07	DOWN
hsa-miR-1287	-1.28158	4.14076	2.17e-07	DOWN
hsa-miR-877	-1.73014	1.5243	2.85e-07	DOWN
hsa-miR-2277	-1.18497	0.840185	4.89e-07	DOWN
hsa-miR-320a	-1.99469	8.45907	5.11e-07	DOWN
hsa-miR-181b-2	-1.48273	6.37246	6.92e-07	DOWN
hsa-miR-4326	-2.34585	2.51138	1.2e-06	DOWN
hsa-miR-1271	-1.50478	1.63087	1.56e-06	DOWN
hsa-miR-891a	-1.62628	0.9384	2.31e-06	DOWN
hsa-miR-939	-1.09668	1.25504	2.33e-06	DOWN
hsa-miR-133b	-2.329	1.76751	2.81e-06	DOWN
hsa-miR-181b-1	-1.31132	6.57317	4.23e-06	DOWN
hsa-miR-3653	-2.03509	3.0072	4.91e-06	DOWN
hsa-miR-4638	-1.019	0.778253	7.73e-06	DOWN
hsa-miR-3130-2	-1.59062	2.01464	9.61e-06	DOWN
hsa-miR-365a	-1.3854	4.60894	1.4e-05	DOWN
hsa-miR-191	-1.20193	9.41603	1.55e-05	DOWN
hsa-let-7e	-1.29579	9.01731	1.97e-05	DOWN
hsa-miR-330	-1.41035	4.5147	2.26e-05	DOWN
hsa-miR-3130-1	-1.54164	1.9859	2.4e-05	DOWN
hsa-miR-365b	-1.32249	4.60157	3.9e-05	DOWN
hsa-miR-3934	-1.1158	1.74885	6.37e-05	DOWN
hsa-miR-767	-2.52813	1.06807	7.41e-05	DOWN
hsa-miR-409	-1.05997	4.9581	8.99e-05	DOWN
hsa-miR-205	-2.62807	1.04257	0.000108387	DOWN
hsa-miR-1248	-1.33837	2.00687	0.000129123	DOWN
hsa-miR-3651	-1.49059	1.57497	0.000148726	DOWN
hsa-miR-3652	-1.25335	1.47601	0.000202441	DOWN
hsa-miR-363	-1.54179	1.87798	0.000235764	DOWN
hsa-miR-500a	-1.18293	8.23611	0.000335183	DOWN
hsa-miR-4449	-1.30289	1.29267	0.000376343	DOWN
hsa-miR-497	-1.06454	3.55477	0.000416154	DOWN
hsa-miR-214	-1.23872	4.37072	0.00043774	DOWN
hsa-miR-3200	-1.32645	2.07925	0.000547915	DOWN
hsa-miR-204	-1.80199	1.60098	0.000978654	DOWN
hsa-miR-940	-1.13769	1.93192	0.00120136	DOWN
hsa-miR-625	-1.31501	8.62773	0.00135679	DOWN
hsa-miR-455	-1.451	7.64975	0.00163209	DOWN
hsa-miR-935	-1.6262	2.3314	0.00292723	DOWN
hsa-miR-483	-2.27042	2.22725	0.0169886	DOWN
hsa-miR-1269b	-1.49411	1.04495	0.0343765	DOWN
hsa-miR-105-2	-1.32097	1.076	0.0390309	DOWN
hsa-miR-21	5.72012	17.4842	2.81e-117	UP
hsa-miR-101-2	4.83411	11.4678	2.69e-76	UP
hsa-miR-101-1	4.8545	11.4513	1.51e-75	UP
hsa-miR-374a	7.12927	9.58146	5.01e-73	UP
hsa-miR-542	4.80132	7.05669	2.57e-53	UP
hsa-miR-98	3.58181	5.59699	1.32e-47	UP
hsa-miR-19b-1	5.44936	6.72618	1.18e-41	UP
hsa-miR-19b-2	5.56015	6.51557	1.43e-40	UP
hsa-miR-889	3.68742	3.86717	1.67e-39	UP
hsa-miR-582	4.79111	8.33864	2.06e-39	UP
hsa-miR-152	3.16965	7.48993	8.22e-38	UP
hsa-miR-141	4.50106	10.639	4.09e-37	UP
hsa-miR-708	4.64917	5.57083	3.2e-36	UP
hsa-miR-374b	3.49833	6.05052	1.74e-35	UP
hsa-miR-29b-1	4.70201	8.47293	3.58e-35	UP
hsa-miR-379	3.76329	9.38522	4.18e-35	UP
hsa-miR-335	4.26408	7.54155	7.85e-34	UP
hsa-miR-424	4.87285	6.81373	9.37e-33	UP
hsa-miR-2355	3.35814	5.01995	2.78e-32	UP
hsa-miR-182	4.23165	13.6818	2.36e-31	UP
hsa-miR-142	6.00382	10.8807	6.61e-31	UP
hsa-miR-452	4.0817	6.59357	4.63e-30	UP
hsa-miR-20a	4.49918	8.77993	7.31e-30	UP
hsa-miR-19a	5.55708	5.46023	1.45e-27	UP
hsa-miR-15a	3.09648	6.84041	1.75e-27	UP
hsa-miR-454	2.998	3.07727	5.93e-27	UP
hsa-miR-590	4.4229	4.46979	7.48e-27	UP
hsa-miR-126	3.40132	10.8972	1.79e-25	UP
hsa-miR-96	3.72157	4.11685	1.8e-25	UP
hsa-miR-16-1	3.74677	8.20145	7.4e-24	UP
hsa-miR-16-2	3.76223	8.22104	7.42e-24	UP
hsa-miR-24-2	1.9697	9.91132	7.77e-24	UP
hsa-miR-135b	5.89641	5.92517	1.93e-23	UP
hsa-miR-144	4.56056	5.73889	2.32e-23	UP
hsa-miR-4677	2.52799	2.84172	6.22e-22	UP
hsa-miR-24-1	1.85344	9.90481	2.1e-21	UP
hsa-miR-450b	3.1558	3.10079	2.95e-21	UP
hsa-miR-148a	3.27038	15.7844	4.07e-20	UP
hsa-miR-369	2.7424	3.57094	5.07e-20	UP
hsa-miR-32	2.94667	5.01704	1.4e-19	UP
hsa-miR-660	3.09957	5.42348	1.69e-19	UP
hsa-miR-203b	4.96669	7.07979	3.82e-19	UP
hsa-miR-3613	3.0449	3.84692	4.74e-18	UP
hsa-miR-136	3.53361	4.80105	9.87e-18	UP
hsa-miR-203a	3.88317	13.9647	5.81e-17	UP
hsa-miR-429	3.16149	8.44622	7.05e-17	UP
hsa-miR-153-2	4.30845	4.85568	1.66e-16	UP
hsa-miR-340	2.12022	4.10894	1.73e-16	UP
hsa-miR-337	2.39492	4.52724	1.99e-16	UP
hsa-miR-30b	2.73314	8.16613	3.32e-16	UP
hsa-miR-17	2.75067	10.273	4.35e-16	UP
hsa-miR-495	2.05531	2.75677	4.88e-16	UP
hsa-miR-411	2.61638	2.95141	3.24e-15	UP
hsa-miR-30e	1.60028	13.0887	3.84e-15	UP
hsa-miR-7-1	2.54759	5.65667	2.05e-14	UP
hsa-miR-217	3.40817	4.71396	4.12e-14	UP
hsa-miR-22	1.40629	15.41	1.38e-13	UP
hsa-miR-10a	2.5735	15.8639	2.51e-13	UP
hsa-miR-376c	2.43969	2.52812	2.58e-13	UP
hsa-miR-218-2	2.54923	2.9416	3.58e-13	UP
hsa-miR-577	5.28245	5.72543	4.99e-13	UP
hsa-miR-190a	2.00936	2.64212	2.33e-12	UP
hsa-miR-301a	3.1923	3.54623	5.32e-12	UP
hsa-let-7f-1	3.07714	11.4258	7.75e-12	UP
hsa-miR-26a-1	1.43775	9.61193	1.5e-11	UP
hsa-let-7f-2	3.02231	11.443	1.88e-11	UP
hsa-miR-26b	1.79856	9.16761	4.69e-11	UP
hsa-miR-215	4.02831	9.03373	8.53e-11	UP
hsa-miR-421	2.05785	2.35084	1.01e-10	UP
hsa-let-7g	1.25973	9.23131	1.1e-10	UP
hsa-miR-143	2.67497	16.7142	1.81e-10	UP
hsa-miR-628	3.43274	3.86617	1.83e-10	UP
hsa-miR-29b-2	2.19825	8.53255	2.43e-10	UP
hsa-miR-26a-2	1.35812	9.6116	2.75e-10	UP
hsa-miR-27a	1.83626	10.5443	5.27e-10	UP
hsa-miR-183	2.23005	12.7583	5.5e-10	UP
hsa-miR-199b	2.48894	11.1496	5.55e-10	UP
hsa-miR-592	4.30813	4.23305	8.72e-10	UP
hsa-miR-1-1	3.20513	3.70578	1.13e-09	UP
hsa-miR-10b	1.68454	14.983	1.16e-09	UP
hsa-miR-450a-1	1.87328	1.84063	1.26e-09	UP
hsa-miR-552	3.98429	6.86944	1.52e-09	UP
hsa-miR-598	2.38446	3.48434	1.65e-09	UP
hsa-miR-29c	2.08515	9.70109	2.64e-09	UP
hsa-miR-450a-2	1.80996	1.77841	3.11e-09	UP
hsa-miR-151a	1.39469	11.1848	1.43e-08	UP
hsa-miR-7-2	2.15949	2.12185	1.9e-08	UP
hsa-miR-651	1.75708	1.92378	3.29e-08	UP
hsa-miR-1-2	2.91964	3.77034	3.35e-08	UP
hsa-miR-493	1.36799	3.7455	6.91e-08	UP
hsa-miR-34a	1.64109	6.67804	7.26e-08	UP
hsa-miR-496	1.41682	1.67353	8.34e-08	UP
hsa-miR-194-1	1.67464	12.8873	9.37e-08	UP
hsa-miR-192	2.33969	15.7914	1.79e-07	UP
hsa-miR-5000	1.2474	1.38298	2.18e-07	UP
hsa-miR-185	1.1211	5.73945	4.09e-07	UP
hsa-miR-95	2.05172	3.72275	4.22e-07	UP
hsa-miR-3677	1.8628	3.15353	5.58e-07	UP
hsa-miR-4662a	2.17102	2.97969	6.2e-07	UP
hsa-miR-653	2.49247	2.44903	6.46e-07	UP
hsa-miR-199a-2	1.86742	10.7465	6.64e-07	UP
hsa-miR-1245a	1.24898	1.22721	9.6e-07	UP
hsa-miR-7-3	1.81276	2.0937	1.02e-06	UP
hsa-miR-376a-1	1.2739	1.2517	1.78e-06	UP
hsa-miR-655	1.25543	1.35753	1.86e-06	UP
hsa-miR-4668	1.61667	1.58849	2.19e-06	UP
hsa-miR-188	1.8735	2.83476	2.28e-06	UP
hsa-miR-5586	1.10794	1.08863	2.28e-06	UP
hsa-miR-494	1.14182	1.24589	6.84e-06	UP
hsa-miR-223	2.03476	8.0157	9.02e-06	UP
hsa-miR-199a-1	1.54603	9.94381	1.48e-05	UP
hsa-miR-196a-2	2.11468	6.80101	1.64e-05	UP
hsa-miR-627	1.32149	1.62674	1.82e-05	UP
hsa-miR-376b	1.20429	1.31426	1.85e-05	UP
hsa-miR-1277	1.19743	1.17656	2e-05	UP
hsa-miR-301b	1.55525	1.68861	2.01e-05	UP
hsa-miR-549a	1.16298	1.14271	3.11e-05	UP
hsa-miR-33a	2.10487	5.43364	3.56e-05	UP
hsa-miR-106a	2.57368	4.83642	4.16e-05	UP
hsa-miR-451a	2.04988	7.68245	4.69e-05	UP
hsa-miR-18a	1.72641	4.82252	6.19e-05	UP
hsa-miR-186	1.01997	8.03994	6.53e-05	UP
hsa-miR-556	1.10447	1.08522	0.000102884	UP
hsa-miR-33b	1.76979	2.57683	0.000109169	UP
hsa-miR-146a	1.52699	7.55379	0.000134702	UP
hsa-miR-338	1.80947	8.40907	0.000157521	UP
hsa-miR-153-1	1.19167	1.1709	0.000162243	UP
hsa-miR-224	1.57097	6.08349	0.000180567	UP
hsa-miR-4791	1.08492	1.06601	0.000439821	UP
hsa-miR-576	1.11329	3.47027	0.000772845	UP
hsa-miR-130a	1.00726	5.0563	0.00206191	UP
hsa-miR-584	1.34241	7.98695	0.00256891	UP
hsa-miR-181d	1.20398	3.91765	0.00327982	UP
hsa-miR-196a-1	1.3824	6.79199	0.00390161	UP
hsa-miR-147b	1.26313	2.28361	0.00426848	UP
hsa-miR-31	1.99452	2.97926	0.0050517	UP
hsa-miR-196b	1.6073	11.105	0.00540214	UP
hsa-miR-412	1.08884	2.32585	0.0109651	UP
hsa-miR-508	1.33981	2.73434	0.0217508	UP
