# Supplementary material for: Profiling the lncRNA-miRNA-mRNA ceRNA network to reveal potential crosstalk between inflammatory bowel disease and colorectal cancer
Source: PeerJ. 2019 Aug 26;7:e7451. doi: 10.7717/peerj.7451 (PMC6714963; doi:10.7717/peerj.7451)
Supplement: Table S10 [file peerj-07-7451-s010.xlsx]

## Sheet: Supplementary Table 10 ceRNA ne
name	score
hsa-miR-127-5p (interacts with) ADM	0.5483
hsa-miR-127-5p (interacts with) ANKRD44	0.1828
hsa-miR-127-5p (interacts with) DPP10-AS1	0.615
hsa-miR-127-5p (interacts with) PCDH7	0.1828
hsa-miR-127-5p (interacts with) PDE3A	0.1828
hsa-miR-127-5p (interacts with) SNX10	0.5483
hsa-miR-130a-5p (interacts with) AGPAT4	0.1828
hsa-miR-130a-5p (interacts with) DOCK4	0.6606
hsa-miR-130a-5p (interacts with) DPP10	0.1828
hsa-miR-130a-5p (interacts with) KLHL5	0.1828
hsa-miR-130a-5p (interacts with) LINC01106	0.744
hsa-miR-130a-5p (interacts with) PCDH7	0.1828
hsa-miR-130a-5p (interacts with) PLAU	0.1828
hsa-miR-130a-5p (interacts with) QKI	0.1828
hsa-miR-130a-5p (interacts with) RNF150	0.1828
hsa-miR-130a-5p (interacts with) SLC6A14	0.1828
hsa-miR-130a-5p (interacts with) VAV3	0.6606
hsa-miR-140-5p (interacts with) ADAMTS1	0.5483
hsa-miR-140-5p (interacts with) AMACR	0.1828
hsa-miR-140-5p (interacts with) C1R	0.2381
hsa-miR-140-5p (interacts with) CEBPD	0.5483
hsa-miR-140-5p (interacts with) CHST15	0.6308
hsa-miR-140-5p (interacts with) CKAP2	0.6308
hsa-miR-140-5p (interacts with) CYP2S1	0.1828
hsa-miR-140-5p (interacts with) DPP10	0.2381
hsa-miR-140-5p (interacts with) DYSF	0.1828
hsa-miR-140-5p (interacts with) GADD45B	0.6308
hsa-miR-140-5p (interacts with) GCH1	0.1828
hsa-miR-140-5p (interacts with) GK	0.6308
hsa-miR-140-5p (interacts with) HELZ2	0.1828
hsa-miR-140-5p (interacts with) HNF4A	0.5483
hsa-miR-140-5p (interacts with) IL1R1	0.1828
hsa-miR-140-5p (interacts with) IYD	0.1828
hsa-miR-140-5p (interacts with) KCND3	0.1828
hsa-miR-140-5p (interacts with) KLHL5	0.6478
hsa-miR-140-5p (interacts with) KLK10	0.6559
hsa-miR-140-5p (interacts with) LINC01106	0.1828
hsa-miR-140-5p (interacts with) NTRK2	0.1828
hsa-miR-140-5p (interacts with) OSMR	0.6308
hsa-miR-140-5p (interacts with) PCDH7	0.6308
hsa-miR-140-5p (interacts with) PI15	0.1828
hsa-miR-140-5p (interacts with) PXMP4	0.1828
hsa-miR-140-5p (interacts with) RAB31	0.2202
hsa-miR-140-5p (interacts with) SERPING1	0.1828
hsa-miR-140-5p (interacts with) STAT1	0.9868
hsa-miR-140-5p (interacts with) STOM	0.6308
hsa-miR-140-5p (interacts with) TAP1	0.5483
hsa-miR-140-5p (interacts with) TCF4	0.6308
hsa-miR-140-5p (interacts with) TDO2	0.2202
hsa-miR-140-5p (interacts with) THBD	0.1828
hsa-miR-140-5p (interacts with) TIFA	0.1828
hsa-miR-140-5p (interacts with) WIPF1	0.5483
hsa-miR-193a-3p (interacts with) AMACR	0.1828
hsa-miR-193a-3p (interacts with) CADM1	0.6478
hsa-miR-193a-3p (interacts with) CXCL2	0.6308
hsa-miR-193a-3p (interacts with) CYP2S1	0.1828
hsa-miR-193a-3p (interacts with) EXPH5	0.6308
hsa-miR-193a-3p (interacts with) GABBR1	0.1828
hsa-miR-193a-3p (interacts with) HMGA2	0.1828
hsa-miR-193a-3p (interacts with) HNF4A	0.5483
hsa-miR-193a-3p (interacts with) ITPR1	0.6308
hsa-miR-193a-3p (interacts with) KLK10	0.1828
hsa-miR-193a-3p (interacts with) LINC01106	0.1828
hsa-miR-193a-3p (interacts with) MMRN1	0.1828
hsa-miR-193a-3p (interacts with) OASL	0.6308
hsa-miR-193a-3p (interacts with) OSMR	0.6308
hsa-miR-193a-3p (interacts with) PLAU	0.9833
hsa-miR-193a-3p (interacts with) PLAUR	0.6308
hsa-miR-193a-3p (interacts with) RAB31	0.1828
hsa-miR-193a-3p (interacts with) RBMS1	0.5483
hsa-miR-193a-3p (interacts with) RGS2	0.1828
hsa-miR-193a-3p (interacts with) SLC6A14	0.1828
hsa-miR-193a-3p (interacts with) STAT1	0.7226
hsa-miR-193a-3p (interacts with) TCF4	0.6478
hsa-miR-193a-3p (interacts with) VAV3	0.1828
hsa-miR-193a-5p (interacts with) DIO3OS	0.605
hsa-miR-193a-5p (interacts with) PAPLN	0.1828
hsa-miR-214-3p (interacts with) ANKRD22	0.1828
hsa-miR-214-3p (interacts with) ANKRD44	0.1828
hsa-miR-214-3p (interacts with) APOD	0.1828
hsa-miR-214-3p (interacts with) C4BPB	0.1828
hsa-miR-214-3p (interacts with) CADM1	0.8785
hsa-miR-214-3p (interacts with) CFB	0.1828
hsa-miR-214-3p (interacts with) CHI3L1	0.1828
hsa-miR-214-3p (interacts with) CSF1	0.6478
hsa-miR-214-3p (interacts with) DOCK4	0.5483
hsa-miR-214-3p (interacts with) GCH1	0.1828
hsa-miR-214-3p (interacts with) GNAL	0.7226
hsa-miR-214-3p (interacts with) HCLS1	0.6478
hsa-miR-214-3p (interacts with) HELZ2	0.5483
hsa-miR-214-3p (interacts with) HMCN2	0.1828
hsa-miR-214-3p (interacts with) HMGA2	0.1828
hsa-miR-214-3p (interacts with) HNF4A	0.5483
hsa-miR-214-3p (interacts with) IDO1	0.1828
hsa-miR-214-3p (interacts with) IFI30	0.6308
hsa-miR-214-3p (interacts with) IGHG1	0.1828
hsa-miR-214-3p (interacts with) IL1R1	0.1828
hsa-miR-214-3p (interacts with) IL1RL1	0.1828
hsa-miR-214-3p (interacts with) IRAK3	0.1828
hsa-miR-214-3p (interacts with) ITPR1	0.6308
hsa-miR-214-3p (interacts with) KLK10	0.1828
hsa-miR-214-3p (interacts with) LINC01106	0.697
hsa-miR-214-3p (interacts with) MEOX1	0.1828
hsa-miR-214-3p (interacts with) MXRA5	0.1828
hsa-miR-214-3p (interacts with) NPTX2	0.6478
hsa-miR-214-3p (interacts with) PAPLN	0.1828
hsa-miR-214-3p (interacts with) PCDH7	0.6308
hsa-miR-214-3p (interacts with) PI3	0.1828
hsa-miR-214-3p (interacts with) PIK3AP1	0.1828
hsa-miR-214-3p (interacts with) PLAUR	0.6308
hsa-miR-214-3p (interacts with) PLEKHO2	0.2202
hsa-miR-214-3p (interacts with) PTGS1	0.6308
hsa-miR-214-3p (interacts with) QKI	0.9833
hsa-miR-214-3p (interacts with) QPRT	0.1828
hsa-miR-214-3p (interacts with) RAB3IP	0.6308
hsa-miR-214-3p (interacts with) RNF150	0.2202
hsa-miR-214-3p (interacts with) SERPING1	0.1828
hsa-miR-214-3p (interacts with) TAP1	0.5483
hsa-miR-214-3p (interacts with) VAV3	0.5483
hsa-miR-27a-3p (interacts with) ADAMTS1	0.6308
hsa-miR-27a-3p (interacts with) AGPAT4	0.1828
hsa-miR-27a-3p (interacts with) ALDH4A1	0.2202
hsa-miR-27a-3p (interacts with) AMOTL1	0.5483
hsa-miR-27a-3p (interacts with) APOD	0.1828
hsa-miR-27a-3p (interacts with) AXIN2	0.6308
hsa-miR-27a-3p (interacts with) BATF2	0.1828
hsa-miR-27a-3p (interacts with) CAB39L	0.9254
hsa-miR-27a-3p (interacts with) CADM1	0.6559
hsa-miR-27a-3p (interacts with) CD55	0.6308
hsa-miR-27a-3p (interacts with) CHRDL1	0.1828
hsa-miR-27a-3p (interacts with) CHST15	0.5483
hsa-miR-27a-3p (interacts with) CLEC2B	0.1828
hsa-miR-27a-3p (interacts with) CSF1	0.6559
hsa-miR-27a-3p (interacts with) CXCL1	0.6308
hsa-miR-27a-3p (interacts with) CXCL11	0.1828
hsa-miR-27a-3p (interacts with) CXCL2	0.6308
hsa-miR-27a-3p (interacts with) DAPP1	0.1828
hsa-miR-27a-3p (interacts with) DIO3OS	0.669
hsa-miR-27a-3p (interacts with) DPP10	0.1828
hsa-miR-27a-3p (interacts with) EXPH5	0.1828
hsa-miR-27a-3p (interacts with) FCGR1A	0.1828
hsa-miR-27a-3p (interacts with) GCH1	0.1828
hsa-miR-27a-3p (interacts with) GIMAP8	0.1828
hsa-miR-27a-3p (interacts with) GK	0.1828
hsa-miR-27a-3p (interacts with) GSPT1	0.6559
hsa-miR-27a-3p (interacts with) HCLS1	0.6308
hsa-miR-27a-3p (interacts with) HELZ2	0.5483
hsa-miR-27a-3p (interacts with) HLX	0.1828
hsa-miR-27a-3p (interacts with) HMGA2	0.6308
hsa-miR-27a-3p (interacts with) HNF4A	0.5483
hsa-miR-27a-3p (interacts with) ITPR1	0.6308
hsa-miR-27a-3p (interacts with) KCNN3	0.5483
hsa-miR-27a-3p (interacts with) LCK	0.1828
hsa-miR-27a-3p (interacts with) LINC01106	0.824
hsa-miR-27a-3p (interacts with) NCOA7	0.6559
hsa-miR-27a-3p (interacts with) NPTX2	0.6478
hsa-miR-27a-3p (interacts with) PCDH7	0.6478
hsa-miR-27a-3p (interacts with) PDE3A	0.6478
hsa-miR-27a-3p (interacts with) PDZK1IP1	0.2202
hsa-miR-27a-3p (interacts with) PLAU	0.1828
hsa-miR-27a-3p (interacts with) PRKCB	0.6559
hsa-miR-27a-3p (interacts with) PSMB9	0.1828
hsa-miR-27a-3p (interacts with) PTGS1	0.6308
hsa-miR-27a-3p (interacts with) QKI	0.6478
hsa-miR-27a-3p (interacts with) RAB3IP	0.2202
hsa-miR-27a-3p (interacts with) RAD52	0.5483
hsa-miR-27a-3p (interacts with) RBMS1	0.1828
hsa-miR-27a-3p (interacts with) RGS1	0.6478
hsa-miR-27a-3p (interacts with) RGS2	0.1828
hsa-miR-27a-3p (interacts with) SH3BP5	0.6308
hsa-miR-27a-3p (interacts with) SLC6A14	0.1828
hsa-miR-27a-3p (interacts with) SLC7A11	0.9837
hsa-miR-27a-3p (interacts with) SNX10	0.6308
hsa-miR-27a-3p (interacts with) STAT1	0.7226
hsa-miR-27a-3p (interacts with) STEAP4	0.1828
hsa-miR-27a-3p (interacts with) STOM	0.6308
hsa-miR-27a-3p (interacts with) TCF4	0.1828
hsa-miR-27a-3p (interacts with) TIFA	0.6308
hsa-miR-27a-3p (interacts with) VAV3	0.6559
hsa-miR-296-5p (interacts with) AGPAT4	0.1828
hsa-miR-296-5p (interacts with) ATP9A	0.5483
hsa-miR-296-5p (interacts with) CXCL10	0.1828
hsa-miR-296-5p (interacts with) DIO3OS	0.725
hsa-miR-296-5p (interacts with) HNF4A	0.5483
hsa-miR-296-5p (interacts with) LAMP3	0.5483
hsa-miR-296-5p (interacts with) PLEKHO2	0.5483
hsa-miR-296-5p (interacts with) SNX20	0.2202
hsa-miR-34a-5p (interacts with) ACKR1	0.1828
hsa-miR-34a-5p (interacts with) ADAMTS1	0.5483
hsa-miR-34a-5p (interacts with) ATP9A	0.5483
hsa-miR-34a-5p (interacts with) AXIN2	0.9007
hsa-miR-34a-5p (interacts with) BCL2A1
hsa-miR-34a-5p (interacts with) BCL6	0.2202
hsa-miR-34a-5p (interacts with) CADM1	0.6308
hsa-miR-34a-5p (interacts with) CFTR	0.1828
hsa-miR-34a-5p (interacts with) CHD3	0.6308
hsa-miR-34a-5p (interacts with) CHST15	0.1828
hsa-miR-34a-5p (interacts with) CLU	0.5483
hsa-miR-34a-5p (interacts with) CXCL10	0.1828
hsa-miR-34a-5p (interacts with) CXCL11	0.1828
hsa-miR-34a-5p (interacts with) CXCL9
hsa-miR-34a-5p (interacts with) DOCK4	0.5483
hsa-miR-34a-5p (interacts with) FKBP11	0.6308
hsa-miR-34a-5p (interacts with) GABBR1	0.1828
hsa-miR-34a-5p (interacts with) GADD45B	0.5483
hsa-miR-34a-5p (interacts with) GBP2	0.6308
hsa-miR-34a-5p (interacts with) GCH1	0.6308
hsa-miR-34a-5p (interacts with) GNAL	0.5483
hsa-miR-34a-5p (interacts with) HELZ2	0.5483
hsa-miR-34a-5p (interacts with) HMGA2	0.5483
hsa-miR-34a-5p (interacts with) HNF4A	0.9833
hsa-miR-34a-5p (interacts with) IDO1	0.1828
hsa-miR-34a-5p (interacts with) IGHG1	0.1828
hsa-miR-34a-5p (interacts with) IL1RN	0.1828
hsa-miR-34a-5p (interacts with) ITPR1	0.5483
hsa-miR-34a-5p (interacts with) LINC01106	0.1828
hsa-miR-34a-5p (interacts with) MMP9	0.9526
hsa-miR-34a-5p (interacts with) OSMR	0.5483
hsa-miR-34a-5p (interacts with) PAPLN	0.5483
hsa-miR-34a-5p (interacts with) PDE3A	0.5483
hsa-miR-34a-5p (interacts with) PLEKHG2	0.1828
hsa-miR-34a-5p (interacts with) PLEKHO2	0.5483
hsa-miR-34a-5p (interacts with) PRKCB	0.1828
hsa-miR-34a-5p (interacts with) RAD52	0.1828
hsa-miR-34a-5p (interacts with) SH3BP5	0.5483
hsa-miR-34a-5p (interacts with) SLC6A14	0.1828
hsa-miR-34a-5p (interacts with) SNX10	0.5483
hsa-miR-34a-5p (interacts with) STAT1
hsa-miR-34a-5p (interacts with) STOM	0.5483
hsa-miR-34a-5p (interacts with) THBD	0.6478
hsa-miR-34a-5p (interacts with) TNFRSF11B	0.6308
hsa-miR-34a-5p (interacts with) VAV3	0.5483
hsa-miR-34a-5p (interacts with) WIPF1	0.1828
hsa-miR-423-5p (interacts with) ANGPTL2	0.1828
hsa-miR-423-5p (interacts with) CHD3	0.1828
hsa-miR-423-5p (interacts with) CYP2S1	0.1828
hsa-miR-423-5p (interacts with) DIO3OS	0.771
hsa-miR-423-5p (interacts with) GABBR1	0.1828
hsa-miR-455-5p (interacts with) BATF2	0.2202
hsa-miR-455-5p (interacts with) CADM1	0.1828
hsa-miR-455-5p (interacts with) CCDC69	0.1828
hsa-miR-455-5p (interacts with) CXCL11	0.1828
hsa-miR-455-5p (interacts with) CXCL9	0.1828
hsa-miR-455-5p (interacts with) DAPP1	0.1828
hsa-miR-455-5p (interacts with) DIO3OS	0.813
hsa-miR-455-5p (interacts with) DOCK4	0.6308
hsa-miR-455-5p (interacts with) EXPH5	0.6478
hsa-miR-455-5p (interacts with) FAM20C	0.1828
hsa-miR-455-5p (interacts with) GAB3	0.1828
hsa-miR-455-5p (interacts with) GCH1	0.1828
hsa-miR-455-5p (interacts with) GHR	0.1828
hsa-miR-455-5p (interacts with) HMGA2	0.6308
hsa-miR-455-5p (interacts with) HNF4A	0.5483
hsa-miR-455-5p (interacts with) IDO1	0.1828
hsa-miR-455-5p (interacts with) IL10RA	0.1828
hsa-miR-455-5p (interacts with) KCNN3	0.1828
hsa-miR-455-5p (interacts with) NCOA7	0.1828
hsa-miR-455-5p (interacts with) PDZK1IP1	0.1828
hsa-miR-455-5p (interacts with) PI15	0.6308
hsa-miR-455-5p (interacts with) PIK3AP1	0.1828
hsa-miR-455-5p (interacts with) PLEKHO2	0.1828
hsa-miR-455-5p (interacts with) QKI	0.7226
hsa-miR-455-5p (interacts with) RAB31	0.6308
hsa-miR-455-5p (interacts with) STAT1	0.7226
hsa-miR-455-5p (interacts with) TBC1D1	0.1828
hsa-miR-455-5p (interacts with) TRIM22	0.1828
hsa-miR-455-5p (interacts with) VAV3	0.6606
hsa-miR-574-5p (interacts with) AMOTL1	0.5483
hsa-miR-574-5p (interacts with) C11orf96	0.1828
hsa-miR-574-5p (interacts with) CHRDL1	0.5483
hsa-miR-574-5p (interacts with) CYP2S1	0.1828
hsa-miR-574-5p (interacts with) DIO3OS	0.686
hsa-miR-574-5p (interacts with) NTRK2	0.1828
hsa-miR-574-5p (interacts with) PRKCB	0.5483
hsa-miR-574-5p (interacts with) RAB3IP
hsa-miR-574-5p (interacts with) SLC7A11	0.6606
hsa-miR-615-3p (interacts with) ADAMTS1	0.5483
hsa-miR-615-3p (interacts with) BCL6	0.6308
hsa-miR-615-3p (interacts with) CHRDL1	0.1828
hsa-miR-615-3p (interacts with) CHST15	0.5483
hsa-miR-615-3p (interacts with) DIO3OS	0.627
hsa-miR-615-3p (interacts with) HELZ2	0.5483
hsa-miR-615-3p (interacts with) HMGA2	0.1828
hsa-miR-615-3p (interacts with) HNF4A	0.5483
hsa-miR-615-3p (interacts with) PTGDS	0.1828
hsa-miR-615-3p (interacts with) RAB31	0.6308
hsa-miR-615-3p (interacts with) STAT1	0.6606
hsa-miR-615-3p (interacts with) TONSL	0.5483
hsa-miR-615-5p (interacts with) DIO3OS	0.61
hsa-miR-615-5p (interacts with) LTB	0.1828
hsa-miR-651-3p (interacts with) AMOTL1	0.5483
hsa-miR-651-3p (interacts with) ANKRD44	0.1828
hsa-miR-651-3p (interacts with) CADM1	0.1828
hsa-miR-651-3p (interacts with) CD55	0.5483
hsa-miR-651-3p (interacts with) CHD3	0.1828
hsa-miR-651-3p (interacts with) CHRDL1	0.5483
hsa-miR-651-3p (interacts with) DOCK4	0.1828
hsa-miR-651-3p (interacts with) DUSP6	0.1828
hsa-miR-651-3p (interacts with) FAM49A	0.1828
hsa-miR-651-3p (interacts with) GK	0.1828
hsa-miR-651-3p (interacts with) IL1RN	0.1828
hsa-miR-651-3p (interacts with) LINC01106	0.75
hsa-miR-651-3p (interacts with) MXRA5	0.1828
hsa-miR-651-3p (interacts with) QKI	0.1828
hsa-miR-651-3p (interacts with) RNF150	0.1828
hsa-miR-651-3p (interacts with) SLC6A14	0.1828
hsa-miR-651-3p (interacts with) SLC7A11	0.1828
hsa-miR-651-3p (interacts with) SNX20	0.1828
hsa-miR-651-3p (interacts with) STAT1	0.1828
hsa-miR-651-3p (interacts with) STEAP4	0.1828
hsa-miR-651-3p (interacts with) TAP2	0.1828
hsa-miR-651-3p (interacts with) VAV3	0.1828
